# Supplementary material for: Epigenetic Therapies in Ovarian Cancer Alter Repetitive Element Expression in a TP53 -Dependent Manner
Source: Oxford University Press journal article supplement (doi:10.1158/0008-5472.can-20-4243), 2021-08-25
Supplement: can-20-4243_supplementary_tables_4-7_suppst4-7.xlsx [file can-20-4243_supplementary_tables_4-7_suppst4-7.xlsx]

## Sheet: Table S4 - OVCA TEtrx Expr
Table S4 - OVCA Cell Line Treated vs Mock TEtranscripts Analysis Results
Cell Line	Treatment	Locus ID	Type	Log2(Fold-Change)
A2780	AZA	Arthur1	DNA	-0.046905
A2780	AZA	Arthur1A	DNA	-0.312867
A2780	AZA	Arthur1B	DNA	0.0674383
A2780	AZA	Arthur1C	DNA	-0.360288
A2780	AZA	Arthur2	DNA	-0.236702
A2780	AZA	BLACKJACK	DNA	-0.0900975
A2780	AZA	Chap1_Mam	DNA	0.0298392
A2780	AZA	Chap1a_Mam	DNA	-0.0121881
A2780	AZA	Charlie10	DNA	0.0825428
A2780	AZA	Charlie10a	DNA	0.130355
A2780	AZA	Charlie10b	DNA	0.219924
A2780	AZA	Charlie11	DNA	0.438105
A2780	AZA	Charlie12	DNA	-0.0583764
A2780	AZA	Charlie13a	DNA	-0.0645295
A2780	AZA	Charlie13b	DNA	-0.0711808
A2780	AZA	Charlie14a	DNA	0.0586438
A2780	AZA	Charlie15a	DNA	0.03031
A2780	AZA	Charlie15b	DNA	-0.150688
A2780	AZA	Charlie16	DNA	-0.174355
A2780	AZA	Charlie16a	DNA	-0.0812325
A2780	AZA	Charlie17	DNA	-0.0840823
A2780	AZA	Charlie17a	DNA	-0.160222
A2780	AZA	Charlie17b	DNA	0.308211
A2780	AZA	Charlie18a	DNA	-0.114747
A2780	AZA	Charlie19a	DNA	0.209215
A2780	AZA	Charlie1	DNA	-0.120394
A2780	AZA	Charlie1a	DNA	-0.121047
A2780	AZA	Charlie1b	DNA	-0.0173091
A2780	AZA	Charlie20a	DNA	0.0326258
A2780	AZA	Charlie21a	DNA	0.0707805
A2780	AZA	Charlie22a	DNA	-0.0763121
A2780	AZA	Charlie23a	DNA	0.0200966
A2780	AZA	Charlie24	DNA	0.0788413
A2780	AZA	Charlie25	DNA	-0.0461796
A2780	AZA	Charlie26a	DNA	-0.0291032
A2780	AZA	Charlie29a	DNA	-0.00342678
A2780	AZA	Charlie29b	DNA	0.0683954
A2780	AZA	Charlie2a	DNA	-0.0498208
A2780	AZA	Charlie2b	DNA	-0.123982
A2780	AZA	Charlie30a	DNA	0.366659
A2780	AZA	Charlie30b	DNA	-0.333079
A2780	AZA	Charlie31a	DNA	-0.166217
A2780	AZA	Charlie32a	DNA	0.383749
A2780	AZA	Charlie3	DNA	-0.389706
A2780	AZA	Charlie4	DNA	-0.12574
A2780	AZA	Charlie4a	DNA	-0.0423867
A2780	AZA	Charlie4z	DNA	-0.0867497
A2780	AZA	Charlie5	DNA	-0.0660759
A2780	AZA	Charlie6	DNA	-0.0145398
A2780	AZA	Charlie7	DNA	-0.0533032
A2780	AZA	Charlie7a	DNA	0.208135
A2780	AZA	Charlie7b_Mars	DNA	0.804888
A2780	AZA	Charlie8	DNA	-0.144755
A2780	AZA	Charlie9	DNA	-0.553337
A2780	AZA	Cheshire	DNA	-0.0265141
A2780	AZA	Chompy-6_Croc	DNA	-0.697603
A2780	AZA	Chompy-7_Croc	DNA	-0.195101
A2780	AZA	DNA1_Mam	DNA	0.0548655
A2780	AZA	Eulor11	DNA	0.389851
A2780	AZA	Eulor1	DNA	-0.245735
A2780	AZA	Eulor8	DNA	0.163573
A2780	AZA	Eulor9A	DNA	0.340484
A2780	AZA	Eulor9B	DNA	-0.00245953
A2780	AZA	Eulor9C	DNA	0.120389
A2780	AZA	EutTc1-N1	DNA	0.262361
A2780	AZA	EutTc1-N2	DNA	0.281327
A2780	AZA	EuthAT-2	DNA	-0.0665988
A2780	AZA	EuthAT-N1	DNA	-0.866487
A2780	AZA	EuthAT-N1a	DNA	-0.321869
A2780	AZA	Eutr11	DNA	-0.273116
A2780	AZA	Eutr15	DNA	-0.0714546
A2780	AZA	Eutr2	DNA	0.620463
A2780	AZA	Eutr2B	DNA	-0.359743
A2780	AZA	FordPrefect	DNA	0.0150897
A2780	AZA	FordPrefect_a	DNA	0.328451
A2780	AZA	HSMAR1	DNA	0.372446
A2780	AZA	HSMAR2	DNA	-0.0674804
A2780	AZA	Kanga11a	DNA	0.468921
A2780	AZA	Kanga1	DNA	0.0580296
A2780	AZA	Kanga1a	DNA	-0.143173
A2780	AZA	Kanga1b	DNA	0.326974
A2780	AZA	Kanga1c	DNA	0.0853029
A2780	AZA	Kanga1d	DNA	0.59052
A2780	AZA	Kanga2_a	DNA	-0.0202492
A2780	AZA	Looper	DNA	0.0343682
A2780	AZA	MADE1	DNA	0.114399
A2780	AZA	MADE2	DNA	0.0933086
A2780	AZA	MARE10	DNA	-0.583037
A2780	AZA	MARE4	DNA	0.0103975
A2780	AZA	MARE8	DNA	-0.0787883
A2780	AZA	MARNA	DNA	-0.13431
A2780	AZA	MER102a	DNA	-0.109608
A2780	AZA	MER102b	DNA	-0.138956
A2780	AZA	MER102c	DNA	-0.0136415
A2780	AZA	MER103C	DNA	-0.0831478
A2780	AZA	MER104	DNA	-0.171335
A2780	AZA	MER105	DNA	-0.0414298
A2780	AZA	MER106A	DNA	-0.0284638
A2780	AZA	MER106B	DNA	0.0150279
A2780	AZA	MER107	DNA	0.0126914
A2780	AZA	MER112	DNA	0.0157296
A2780	AZA	MER113	DNA	-0.161
A2780	AZA	MER113A	DNA	-0.248029
A2780	AZA	MER115	DNA	0.00487335
A2780	AZA	MER117	DNA	-0.0799491
A2780	AZA	MER119	DNA	-0.210397
A2780	AZA	MER121	DNA	-0.102482
A2780	AZA	MER121B	DNA	-0.0383858
A2780	AZA	MER125	DNA	-0.018233
A2780	AZA	MER126	DNA	-0.0507233
A2780	AZA	MER127	DNA	0.272219
A2780	AZA	MER130	DNA	-0.0910042
A2780	AZA	MER132	DNA	0.0679296
A2780	AZA	MER135	DNA	-0.217166
A2780	AZA	MER136	DNA	-0.088191
A2780	AZA	MER1A	DNA	-0.285117
A2780	AZA	MER1B	DNA	-0.0481681
A2780	AZA	MER20	DNA	-0.17629
A2780	AZA	MER20B	DNA	0.000975373
A2780	AZA	MER2	DNA	0.0490373
A2780	AZA	MER2B	DNA	-0.0258326
A2780	AZA	MER30	DNA	-0.0381144
A2780	AZA	MER30B	DNA	-0.371143
A2780	AZA	MER33	DNA	-0.0612452
A2780	AZA	MER3	DNA	0.00276181
A2780	AZA	MER44A	DNA	-0.0804756
A2780	AZA	MER44B	DNA	0.00758389
A2780	AZA	MER44C	DNA	-0.0379343
A2780	AZA	MER44D	DNA	-0.245061
A2780	AZA	MER45A	DNA	-0.307625
A2780	AZA	MER45B	DNA	0.120662
A2780	AZA	MER45C	DNA	-0.0849306
A2780	AZA	MER45R	DNA	0.188216
A2780	AZA	MER46C	DNA	0.103853
A2780	AZA	MER47A	DNA	-0.00246864
A2780	AZA	MER47B	DNA	0.00596008
A2780	AZA	MER47C	DNA	-0.033524
A2780	AZA	MER53	DNA	-0.0600899
A2780	AZA	MER58A	DNA	-0.000927324
A2780	AZA	MER58B	DNA	-0.066601
A2780	AZA	MER58C	DNA	-0.100236
A2780	AZA	MER58D	DNA	0.0219267
A2780	AZA	MER5A1	DNA	-0.109219
A2780	AZA	MER5A	DNA	-0.0242635
A2780	AZA	MER5B	DNA	-0.0355771
A2780	AZA	MER5C1	DNA	-0.0394627
A2780	AZA	MER5C	DNA	0.0364882
A2780	AZA	MER63A	DNA	0.0756755
A2780	AZA	MER63B	DNA	0.580048
A2780	AZA	MER63C	DNA	0.434518
A2780	AZA	MER63D	DNA	-0.106619
A2780	AZA	MER6	DNA	-0.221126
A2780	AZA	MER6A	DNA	0.198304
A2780	AZA	MER6B	DNA	0.187541
A2780	AZA	MER6C	DNA	-0.137008
A2780	AZA	MER75	DNA	0.404733
A2780	AZA	MER75A	DNA	0.202224
A2780	AZA	MER75B	DNA	-0.417499
A2780	AZA	MER81	DNA	-0.0157718
A2780	AZA	MER85	DNA	-0.0634179
A2780	AZA	MER8	DNA	-0.024985
A2780	AZA	MER91A	DNA	-0.161026
A2780	AZA	MER91B	DNA	-0.38114
A2780	AZA	MER91C	DNA	0.0715128
A2780	AZA	MER94	DNA	-0.0156875
A2780	AZA	MER94B	DNA	-0.387758
A2780	AZA	MER96	DNA	0.279795
A2780	AZA	MER96B	DNA	0.141798
A2780	AZA	MER97a	DNA	-0.191351
A2780	AZA	MER97b	DNA	-1.17239
A2780	AZA	MER97c	DNA	-0.249559
A2780	AZA	MER97d	DNA	0.53187
A2780	AZA	MER99	DNA	-0.314411
A2780	AZA	MERX	DNA	-0.871355
A2780	AZA	MamRep137	DNA	-0.135304
A2780	AZA	MamRep1879	DNA	-0.141449
A2780	AZA	MamRep1894	DNA	-0.0662581
A2780	AZA	MamRep38	DNA	-0.339043
A2780	AZA	MamRep4096	DNA	-0.306067
A2780	AZA	MamRep434	DNA	-0.0270277
A2780	AZA	MamRep488	DNA	0.332134
A2780	AZA	MamTip1	DNA	-0.142646
A2780	AZA	MamTip1b	DNA	0.214924
A2780	AZA	MamTip2	DNA	-0.108305
A2780	AZA	MamTip2b	DNA	0.00181872
A2780	AZA	MamTip3	DNA	-0.0491658
A2780	AZA	MamTip3B	DNA	-0.00150934
A2780	AZA	Merlin1_HS	DNA	-0.469733
A2780	AZA	ORSL-2a	DNA	-0.0182346
A2780	AZA	ORSL-2b	DNA	1.5563
A2780	AZA	ORSL	DNA	0.262093
A2780	AZA	OldhAT1	DNA	-0.0639893
A2780	AZA	Ricksha	DNA	0.269128
A2780	AZA	Ricksha_0	DNA	-0.195112
A2780	AZA	Ricksha_a	DNA	0.319463
A2780	AZA	Ricksha_b	DNA	-0.0333613
A2780	AZA	Ricksha_c	DNA	0.0641293
A2780	AZA	Tigger10	DNA	-0.0110363
A2780	AZA	Tigger11a	DNA	-0.207119
A2780	AZA	Tigger12	DNA	0.02105
A2780	AZA	Tigger12A	DNA	-0.102817
A2780	AZA	Tigger12c	DNA	-0.180317
A2780	AZA	Tigger13a	DNA	-0.0347809
A2780	AZA	Tigger14a	DNA	0.0545342
A2780	AZA	Tigger15a	DNA	-0.0695828
A2780	AZA	Tigger16a	DNA	0.0492964
A2780	AZA	Tigger16b	DNA	0.339004
A2780	AZA	Tigger17	DNA	0.120501
A2780	AZA	Tigger17a	DNA	-0.15169
A2780	AZA	Tigger17b	DNA	-0.566561
A2780	AZA	Tigger17c	DNA	0.0542462
A2780	AZA	Tigger17d	DNA	-0.464656
A2780	AZA	Tigger18a	DNA	-0.0211732
A2780	AZA	Tigger19a	DNA	-0.02599
A2780	AZA	Tigger19b	DNA	-0.00144936
A2780	AZA	Tigger1	DNA	-0.0819285
A2780	AZA	Tigger1a_Art	DNA	-0.138529
A2780	AZA	Tigger1a_Mars	DNA	-1.51703
A2780	AZA	Tigger20a	DNA	-0.107856
A2780	AZA	Tigger21a	DNA	-0.383874
A2780	AZA	Tigger22N1	DNA	-0.00623377
A2780	AZA	Tigger23a	DNA	-0.170288
A2780	AZA	Tigger2	DNA	-0.312352
A2780	AZA	Tigger2a	DNA	-0.138733
A2780	AZA	Tigger2b_Pri	DNA	-0.10515
A2780	AZA	Tigger3	DNA	-0.10692
A2780	AZA	Tigger3a	DNA	0.0321818
A2780	AZA	Tigger3b	DNA	0.12876
A2780	AZA	Tigger3c	DNA	0.15242
A2780	AZA	Tigger3d	DNA	0.128501
A2780	AZA	Tigger4	DNA	-0.263904
A2780	AZA	Tigger4a	DNA	0.0239009
A2780	AZA	Tigger4b	DNA	-0.134515
A2780	AZA	Tigger5	DNA	-0.00755725
A2780	AZA	Tigger5b	DNA	-0.106758
A2780	AZA	Tigger6	DNA	0.366273
A2780	AZA	Tigger6a	DNA	-0.0216827
A2780	AZA	Tigger6b	DNA	-0.150375
A2780	AZA	Tigger7	DNA	-0.0460473
A2780	AZA	Tigger8	DNA	0.0857343
A2780	AZA	Tigger9a	DNA	-0.220649
A2780	AZA	Tigger9b	DNA	-0.315246
A2780	AZA	UCON105	DNA	0.363515
A2780	AZA	UCON11	DNA	-0.610135
A2780	AZA	UCON23	DNA	-0.621373
A2780	AZA	UCON29	DNA	-0.141475
A2780	AZA	UCON33	DNA	0.521715
A2780	AZA	UCON34	DNA	-0.201062
A2780	AZA	UCON37	DNA	0.389851
A2780	AZA	UCON38	DNA	0.455992
A2780	AZA	UCON39	DNA	0.601355
A2780	AZA	UCON40	DNA	-0.526626
A2780	AZA	UCON44	DNA	-0.0758604
A2780	AZA	UCON55	DNA	-0.0522213
A2780	AZA	UCON69	DNA	-4.44502
A2780	AZA	UCON73	DNA	-0.337853
A2780	AZA	UCON78	DNA	-0.170865
A2780	AZA	UCON80	DNA	-0.557675
A2780	AZA	UCON81	DNA	-0.780046
A2780	AZA	UCON89	DNA	-0.195103
A2780	AZA	UCON8	DNA	-0.0816119
A2780	AZA	UCON97	DNA	-0.195101
A2780	AZA	UCON99	DNA	0.104453
A2780	AZA	X10b_DNA	DNA	-0.16068
A2780	AZA	X11_DNA	DNA	0.369672
A2780	AZA	X12_DNA	DNA	-0.136346
A2780	AZA	X1_DNA	DNA	-0.350211
A2780	AZA	X23_DNA	DNA	1.80488
A2780	AZA	X24_DNA	DNA	-0.0819022
A2780	AZA	X26_DNA	DNA	0.000159292
A2780	AZA	X2a_DNA	DNA	-0.302917
A2780	AZA	X2b_DNA	DNA	0.24546
A2780	AZA	X30_DNA	DNA	0.118745
A2780	AZA	X32_DNA	DNA	0.217668
A2780	AZA	X33a_DNA	DNA	-0.195111
A2780	AZA	X34_DNA	DNA	0.101282
A2780	AZA	X4a_DNA	DNA	0.25806
A2780	AZA	X4b_DNA	DNA	0.11784
A2780	AZA	X5a_DNA	DNA	0.13673
A2780	AZA	X6a_DNA	DNA	-0.0324934
A2780	AZA	X6b_DNA	DNA	-0.0354109
A2780	AZA	X9a_DNA	DNA	0.073438
A2780	AZA	X9b_DNA	DNA	0.119484
A2780	AZA	Zaphod2	DNA	-0.31797
A2780	AZA	Zaphod3	DNA	0.0101116
A2780	AZA	Zaphod4a	DNA	0.125597
A2780	AZA	Zaphod5a	DNA	0.0190138
A2780	AZA	Zaphod5b	DNA	0.515384
A2780	AZA	Zaphod	DNA	-0.049466
A2780	AZA	hAT-16_Crp	DNA	-0.654532
A2780	AZA	hAT-1_Mam	DNA	-0.262408
A2780	AZA	hAT-4b_Ther	DNA	0.535952
A2780	AZA	hAT-5_Mam	DNA	0.131324
A2780	AZA	hAT-N1_Mam	DNA	0.00983871
A2780	AZA	hAT-N1a_Mam	DNA	-0.199614
A2780	AZA	EUTREP4	DNA?	-0.255233
A2780	AZA	Eulor10	DNA?	-0.610135
A2780	AZA	Eulor12	DNA?	1.29031
A2780	AZA	Eulor2A	DNA?	-0.215011
A2780	AZA	Eulor2B	DNA?	0.0528175
A2780	AZA	Eulor2C	DNA?	0.364317
A2780	AZA	Eulor3	DNA?	0.435655
A2780	AZA	Eulor5A	DNA?	0.315926
A2780	AZA	Eulor5B	DNA?	-0.610141
A2780	AZA	Eulor6A	DNA?	1.21992
A2780	AZA	Eulor6B	DNA?	0.110992
A2780	AZA	Eulor6C	DNA?	-0.088191
A2780	AZA	Eulor6D	DNA?	-0.164737
A2780	AZA	Eulor6E	DNA?	-0.195109
A2780	AZA	Eutr16	DNA?	0.206403
A2780	AZA	MER123	DNA?	0.524781
A2780	AZA	MER124	DNA?	-0.0114535
A2780	AZA	MER131	DNA?	0.100535
A2780	AZA	MER133A	DNA?	-0.658084
A2780	AZA	MER133B	DNA?	-0.654541
A2780	AZA	MER134	DNA?	-0.320004
A2780	AZA	UCON100	DNA?	2.12679
A2780	AZA	UCON14	DNA?	0.482961
A2780	AZA	UCON21	DNA?	0.541855
A2780	AZA	UCON2	DNA?	-0.658083
A2780	AZA	UCON58	DNA?	-0.4636
A2780	AZA	UCON62	DNA?	1.21992
A2780	AZA	UCON7	DNA?	0.366767
A2780	AZA	UCON83	DNA?	-0.0482714
A2780	AZA	ENSG00000000003.12	gene	0.928557
A2780	AZA	ENSG00000000005.5	gene	-1.51702
A2780	AZA	ENSG00000000419.10	gene	0.631522
A2780	AZA	ENSG00000000457.11	gene	0.200923
A2780	AZA	ENSG00000000460.14	gene	-0.252906
A2780	AZA	ENSG00000000971.13	gene	-1.12206
A2780	AZA	ENSG00000001036.11	gene	-0.321537
A2780	AZA	ENSG00000001084.8	gene	0.0577966
A2780	AZA	ENSG00000001167.12	gene	0.378176
A2780	AZA	ENSG00000001460.15	gene	-0.108956
A2780	AZA	ENSG00000001461.14	gene	0.108563
A2780	AZA	ENSG00000001497.14	gene	0.117149
A2780	AZA	ENSG00000001617.9	gene	1.60325
A2780	AZA	ENSG00000001626.12	gene	1.94239
A2780	AZA	ENSG00000001629.7	gene	0.0642972
A2780	AZA	ENSG00000001630.13	gene	0.0948795
A2780	AZA	ENSG00000001631.12	gene	0.0295633
A2780	AZA	ENSG00000002016.14	gene	-0.357385
A2780	AZA	ENSG00000002079.10	gene	4.80484
A2780	AZA	ENSG00000002330.11	gene	-0.310589
A2780	AZA	ENSG00000002549.10	gene	1.20227
A2780	AZA	ENSG00000002586.15	gene	-0.338704
A2780	AZA	ENSG00000002746.12	gene	2.80483
A2780	AZA	ENSG00000002822.13	gene	-0.100153
A2780	AZA	ENSG00000002834.15	gene	0.492234
A2780	AZA	ENSG00000002919.12	gene	0.444712
A2780	AZA	ENSG00000003056.5	gene	-0.146579
A2780	AZA	ENSG00000003096.11	gene	0.200815
A2780	AZA	ENSG00000003137.6	gene	0.983225
A2780	AZA	ENSG00000003147.15	gene	-0.195111
A2780	AZA	ENSG00000003249.11	gene	-0.345355
A2780	AZA	ENSG00000003393.12	gene	0.57796
A2780	AZA	ENSG00000003400.12	gene	1.87605
A2780	AZA	ENSG00000003402.17	gene	-0.480341
A2780	AZA	ENSG00000003436.12	gene	0.934947
A2780	AZA	ENSG00000003509.13	gene	0.271022
A2780	AZA	ENSG00000003756.14	gene	-0.24347
A2780	AZA	ENSG00000003987.11	gene	2.38984
A2780	AZA	ENSG00000003989.14	gene	-0.100132
A2780	AZA	ENSG00000004059.8	gene	0.327409
A2780	AZA	ENSG00000004139.11	gene	-1.404
A2780	AZA	ENSG00000004142.9	gene	-0.0259275
A2780	AZA	ENSG00000004399.10	gene	0.913411
A2780	AZA	ENSG00000004455.14	gene	0.134309
A2780	AZA	ENSG00000004468.10	gene	3.97476
A2780	AZA	ENSG00000004478.6	gene	0.220896
A2780	AZA	ENSG00000004487.13	gene	0.0332051
A2780	AZA	ENSG00000004534.12	gene	0.106223
A2780	AZA	ENSG00000004660.12	gene	-0.201372
A2780	AZA	ENSG00000004700.13	gene	0.435929
A2780	AZA	ENSG00000004766.13	gene	0.342749
A2780	AZA	ENSG00000004776.9	gene	3.38982
A2780	AZA	ENSG00000004777.16	gene	0.252349
A2780	AZA	ENSG00000004779.7	gene	0.727966
A2780	AZA	ENSG00000004838.11	gene	1.29031
A2780	AZA	ENSG00000004848.6	gene	0.0679296
A2780	AZA	ENSG00000004864.11	gene	-0.276437
A2780	AZA	ENSG00000004866.16	gene	-0.038464
A2780	AZA	ENSG00000004897.9	gene	0.272056
A2780	AZA	ENSG00000004939.11	gene	-1.19508
A2780	AZA	ENSG00000004961.12	gene	1.20699
A2780	AZA	ENSG00000004975.9	gene	-0.363976
A2780	AZA	ENSG00000005001.7	gene	4.24731
A2780	AZA	ENSG00000005007.10	gene	-0.23285
A2780	AZA	ENSG00000005020.10	gene	4.06791
A2780	AZA	ENSG00000005022.5	gene	0.587295
A2780	AZA	ENSG00000005059.13	gene	0.937723
A2780	AZA	ENSG00000005075.13	gene	0.240167
A2780	AZA	ENSG00000005100.10	gene	-0.0576101
A2780	AZA	ENSG00000005102.10	gene	-4.13055
A2780	AZA	ENSG00000005108.13	gene	1.85551
A2780	AZA	ENSG00000005156.9	gene	-0.0649874
A2780	AZA	ENSG00000005175.7	gene	0.205357
A2780	AZA	ENSG00000005187.9	gene	-1.1951
A2780	AZA	ENSG00000005189.17	gene	0.103411
A2780	AZA	ENSG00000005194.12	gene	0.460474
A2780	AZA	ENSG00000005206.14	gene	-0.677894
A2780	AZA	ENSG00000005238.17	gene	0.664406
A2780	AZA	ENSG00000005243.7	gene	1.45696
A2780	AZA	ENSG00000005249.10	gene	0.958558
A2780	AZA	ENSG00000005302.15	gene	0.67449
A2780	AZA	ENSG00000005339.10	gene	-0.665504
A2780	AZA	ENSG00000005436.11	gene	-0.0650771
A2780	AZA	ENSG00000005448.14	gene	-0.508529
A2780	AZA	ENSG00000005469.9	gene	0.362744
A2780	AZA	ENSG00000005483.17	gene	-0.131475
A2780	AZA	ENSG00000005486.14	gene	0.308056
A2780	AZA	ENSG00000005513.9	gene	-1.51702
A2780	AZA	ENSG00000005700.12	gene	0.440352
A2780	AZA	ENSG00000005801.14	gene	0.396544
A2780	AZA	ENSG00000005810.15	gene	0.149573
A2780	AZA	ENSG00000005812.8	gene	0.354061
A2780	AZA	ENSG00000005844.15	gene	1.38983
A2780	AZA	ENSG00000005882.9	gene	-0.598468
A2780	AZA	ENSG00000005884.15	gene	-0.0748186
A2780	AZA	ENSG00000005889.13	gene	0.0818413
A2780	AZA	ENSG00000005893.13	gene	0.267469
A2780	AZA	ENSG00000005961.15	gene	-2.03945
A2780	AZA	ENSG00000006007.9	gene	0.368078
A2780	AZA	ENSG00000006015.15	gene	-0.0389934
A2780	AZA	ENSG00000006016.8	gene	1.06792
A2780	AZA	ENSG00000006025.9	gene	-0.410839
A2780	AZA	ENSG00000006042.9	gene	0.956891
A2780	AZA	ENSG00000006047.10	gene	-1.37316
A2780	AZA	ENSG00000006062.11	gene	0.643364
A2780	AZA	ENSG00000006071.9	gene	-2.00246
A2780	AZA	ENSG00000006118.12	gene	-0.816601
A2780	AZA	ENSG00000006125.14	gene	0.0872932
A2780	AZA	ENSG00000006128.9	gene	1.20699
A2780	AZA	ENSG00000006194.8	gene	-0.48845
A2780	AZA	ENSG00000006282.17	gene	-0.883167
A2780	AZA	ENSG00000006283.15	gene	-1.46045
A2780	AZA	ENSG00000006327.11	gene	1.36194
A2780	AZA	ENSG00000006377.10	gene	-0.659517
A2780	AZA	ENSG00000006432.13	gene	-0.346776
A2780	AZA	ENSG00000006451.5	gene	0.338389
A2780	AZA	ENSG00000006453.11	gene	0.110281
A2780	AZA	ENSG00000006459.8	gene	0.0114682
A2780	AZA	ENSG00000006468.11	gene	-0.34282
A2780	AZA	ENSG00000006530.13	gene	0.210525
A2780	AZA	ENSG00000006534.13	gene	1.98546
A2780	AZA	ENSG00000006576.14	gene	0.393146
A2780	AZA	ENSG00000006607.11	gene	0.114592
A2780	AZA	ENSG00000006611.13	gene	2.61223
A2780	AZA	ENSG00000006625.15	gene	-0.128499
A2780	AZA	ENSG00000006634.5	gene	0.269329
A2780	AZA	ENSG00000006638.9	gene	1.26432
A2780	AZA	ENSG00000006652.11	gene	-0.148731
A2780	AZA	ENSG00000006695.8	gene	0.00518575
A2780	AZA	ENSG00000006704.8	gene	0.0444622
A2780	AZA	ENSG00000006712.12	gene	0.294197
A2780	AZA	ENSG00000006715.13	gene	0.0390634
A2780	AZA	ENSG00000006740.14	gene	0.219925
A2780	AZA	ENSG00000006744.16	gene	-0.191152
A2780	AZA	ENSG00000006747.12	gene	1.07714
A2780	AZA	ENSG00000006756.13	gene	-0.195112
A2780	AZA	ENSG00000006757.9	gene	-0.203476
A2780	AZA	ENSG00000006831.9	gene	0.316447
A2780	AZA	ENSG00000006837.9	gene	-0.28
A2780	AZA	ENSG00000007038.8	gene	7.49539
A2780	AZA	ENSG00000007047.12	gene	-0.278598
A2780	AZA	ENSG00000007062.9	gene	0.804885
A2780	AZA	ENSG00000007080.8	gene	-0.107454
A2780	AZA	ENSG00000007168.10	gene	-0.119219
A2780	AZA	ENSG00000007171.14	gene	-0.365031
A2780	AZA	ENSG00000007202.12	gene	0.0551461
A2780	AZA	ENSG00000007237.16	gene	3.97476
A2780	AZA	ENSG00000007255.8	gene	-1.11265
A2780	AZA	ENSG00000007264.11	gene	-1.33172
A2780	AZA	ENSG00000007312.10	gene	7.56939
A2780	AZA	ENSG00000007314.9	gene	1.31946
A2780	AZA	ENSG00000007341.16	gene	-0.481135
A2780	AZA	ENSG00000007350.14	gene	10.417
A2780	AZA	ENSG00000007372.18	gene	-0.195106
A2780	AZA	ENSG00000007376.5	gene	0.0139833
A2780	AZA	ENSG00000007384.13	gene	0.939816
A2780	AZA	ENSG00000007392.14	gene	-0.102661
A2780	AZA	ENSG00000007402.9	gene	0.268835
A2780	AZA	ENSG00000007516.11	gene	6.41736
A2780	AZA	ENSG00000007520.3	gene	0.0957241
A2780	AZA	ENSG00000007541.12	gene	-0.259243
A2780	AZA	ENSG00000007545.13	gene	-0.412057
A2780	AZA	ENSG00000007866.16	gene	0.411654
A2780	AZA	ENSG00000007923.13	gene	-0.153087
A2780	AZA	ENSG00000007944.12	gene	1.7483
A2780	AZA	ENSG00000007968.6	gene	-0.229329
A2780	AZA	ENSG00000008018.8	gene	1.10158
A2780	AZA	ENSG00000008056.10	gene	1.90442
A2780	AZA	ENSG00000008083.11	gene	0.256823
A2780	AZA	ENSG00000008086.8	gene	1.49078
A2780	AZA	ENSG00000008128.20	gene	-0.00246747
A2780	AZA	ENSG00000008130.13	gene	-0.219776
A2780	AZA	ENSG00000008226.17	gene	1.38984
A2780	AZA	ENSG00000008256.13	gene	0.364314
A2780	AZA	ENSG00000008277.12	gene	0.265791
A2780	AZA	ENSG00000008282.5	gene	-0.137259
A2780	AZA	ENSG00000008283.13	gene	0.534435
A2780	AZA	ENSG00000008294.18	gene	0.820028
A2780	AZA	ENSG00000008300.12	gene	-0.432522
A2780	AZA	ENSG00000008311.12	gene	0.940069
A2780	AZA	ENSG00000008324.8	gene	0.590762
A2780	AZA	ENSG00000008382.13	gene	-0.269537
A2780	AZA	ENSG00000008394.10	gene	0.0752451
A2780	AZA	ENSG00000008405.9	gene	0.538224
A2780	AZA	ENSG00000008441.14	gene	-1.39584
A2780	AZA	ENSG00000008513.12	gene	0.804875
A2780	AZA	ENSG00000008516.14	gene	-0.1951
A2780	AZA	ENSG00000008517.14	gene	3.90642
A2780	AZA	ENSG00000008710.15	gene	-0.921336
A2780	AZA	ENSG00000008735.12	gene	-0.633996
A2780	AZA	ENSG00000008838.15	gene	-0.413114
A2780	AZA	ENSG00000008853.14	gene	-0.00650328
A2780	AZA	ENSG00000008869.9	gene	0.0435273
A2780	AZA	ENSG00000008952.14	gene	-0.118168
A2780	AZA	ENSG00000008988.7	gene	0.0417933
A2780	AZA	ENSG00000009307.13	gene	-0.0520198
A2780	AZA	ENSG00000009335.15	gene	0.127035
A2780	AZA	ENSG00000009413.13	gene	0.16869
A2780	AZA	ENSG00000009694.11	gene	2.18503
A2780	AZA	ENSG00000009724.14	gene	0.804888
A2780	AZA	ENSG00000009780.13	gene	-0.132528
A2780	AZA	ENSG00000009830.9	gene	-0.379145
A2780	AZA	ENSG00000009844.13	gene	0.630556
A2780	AZA	ENSG00000009950.13	gene	-0.339501
A2780	AZA	ENSG00000009954.8	gene	-0.0707093
A2780	AZA	ENSG00000010017.11	gene	0.0437755
A2780	AZA	ENSG00000010030.11	gene	4.64618
A2780	AZA	ENSG00000010072.13	gene	0.731156
A2780	AZA	ENSG00000010165.17	gene	0.190945
A2780	AZA	ENSG00000010219.11	gene	0.16885
A2780	AZA	ENSG00000010244.14	gene	-0.174427
A2780	AZA	ENSG00000010256.8	gene	0.371487
A2780	AZA	ENSG00000010270.11	gene	0.227296
A2780	AZA	ENSG00000010278.9	gene	1.56269
A2780	AZA	ENSG00000010282.12	gene	-0.195101
A2780	AZA	ENSG00000010292.10	gene	0.203449
A2780	AZA	ENSG00000010295.17	gene	-0.312765
A2780	AZA	ENSG00000010310.6	gene	-0.657016
A2780	AZA	ENSG00000010318.17	gene	0.182254
A2780	AZA	ENSG00000010319.4	gene	0.290316
A2780	AZA	ENSG00000010322.13	gene	-0.235377
A2780	AZA	ENSG00000010327.8	gene	3.3898
A2780	AZA	ENSG00000010361.11	gene	0.024794
A2780	AZA	ENSG00000010379.13	gene	1.75908
A2780	AZA	ENSG00000010404.15	gene	0.465878
A2780	AZA	ENSG00000010539.9	gene	0.335642
A2780	AZA	ENSG00000010610.7	gene	-0.697603
A2780	AZA	ENSG00000010626.12	gene	0.345456
A2780	AZA	ENSG00000010671.13	gene	-0.1951
A2780	AZA	ENSG00000010704.16	gene	-0.312152
A2780	AZA	ENSG00000010803.14	gene	-0.570495
A2780	AZA	ENSG00000010810.15	gene	-0.110451
A2780	AZA	ENSG00000010818.6	gene	0.41257
A2780	AZA	ENSG00000011007.10	gene	0.024846
A2780	AZA	ENSG00000011009.8	gene	0.768128
A2780	AZA	ENSG00000011021.19	gene	-0.319701
A2780	AZA	ENSG00000011028.11	gene	-0.0136668
A2780	AZA	ENSG00000011052.19	gene	0.622233
A2780	AZA	ENSG00000011105.9	gene	0.819684
A2780	AZA	ENSG00000011114.12	gene	-0.351118
A2780	AZA	ENSG00000011132.9	gene	0.278819
A2780	AZA	ENSG00000011143.14	gene	-0.286021
A2780	AZA	ENSG00000011198.5	gene	0.306433
A2780	AZA	ENSG00000011201.8	gene	2.21991
A2780	AZA	ENSG00000011243.15	gene	-0.0734662
A2780	AZA	ENSG00000011258.13	gene	-0.56386
A2780	AZA	ENSG00000011260.11	gene	0.00122153
A2780	AZA	ENSG00000011275.16	gene	-0.00582024
A2780	AZA	ENSG00000011295.13	gene	-0.127999
A2780	AZA	ENSG00000011304.14	gene	0.179904
A2780	AZA	ENSG00000011332.17	gene	1.46385
A2780	AZA	ENSG00000011347.7	gene	0.500035
A2780	AZA	ENSG00000011376.7	gene	0.0516523
A2780	AZA	ENSG00000011405.11	gene	0.135745
A2780	AZA	ENSG00000011422.9	gene	-1.13371
A2780	AZA	ENSG00000011426.8	gene	0.311823
A2780	AZA	ENSG00000011451.15	gene	-0.396411
A2780	AZA	ENSG00000011454.14	gene	-0.15584
A2780	AZA	ENSG00000011465.14	gene	0.449793
A2780	AZA	ENSG00000011478.9	gene	0.246397
A2780	AZA	ENSG00000011485.12	gene	0.0896859
A2780	AZA	ENSG00000011523.11	gene	-0.647625
A2780	AZA	ENSG00000011566.12	gene	0.187373
A2780	AZA	ENSG00000011600.9	gene	4.97477
A2780	AZA	ENSG00000011638.8	gene	2.54184
A2780	AZA	ENSG00000011677.10	gene	7.70689
A2780	AZA	ENSG00000012048.17	gene	-0.527679
A2780	AZA	ENSG00000012061.13	gene	0.303424
A2780	AZA	ENSG00000012124.12	gene	1.80483
A2780	AZA	ENSG00000012171.15	gene	-0.076467
A2780	AZA	ENSG00000012174.9	gene	-0.221694
A2780	AZA	ENSG00000012211.10	gene	-0.0748188
A2780	AZA	ENSG00000012223.10	gene	1.71177
A2780	AZA	ENSG00000012232.6	gene	0.183772
A2780	AZA	ENSG00000012660.11	gene	-0.370795
A2780	AZA	ENSG00000012779.8	gene	4.24731
A2780	AZA	ENSG00000012822.13	gene	-0.0141105
A2780	AZA	ENSG00000012963.11	gene	0.293261
A2780	AZA	ENSG00000012983.9	gene	0.217401
A2780	AZA	ENSG00000013016.12	gene	0.579654
A2780	AZA	ENSG00000013275.5	gene	0.603989
A2780	AZA	ENSG00000013288.6	gene	-0.306316
A2780	AZA	ENSG00000013293.5	gene	2.3898
A2780	AZA	ENSG00000013297.8	gene	1.58249
A2780	AZA	ENSG00000013306.13	gene	0.169495
A2780	AZA	ENSG00000013364.16	gene	0.992877
A2780	AZA	ENSG00000013374.13	gene	0.68984
A2780	AZA	ENSG00000013375.13	gene	0.281789
A2780	AZA	ENSG00000013392.7	gene	-0.102003
A2780	AZA	ENSG00000013441.13	gene	-0.287845
A2780	AZA	ENSG00000013503.7	gene	0.246571
A2780	AZA	ENSG00000013523.7	gene	-0.294123
A2780	AZA	ENSG00000013561.15	gene	0.502324
A2780	AZA	ENSG00000013563.11	gene	0.190778
A2780	AZA	ENSG00000013573.14	gene	-0.487522
A2780	AZA	ENSG00000013583.6	gene	-0.411859
A2780	AZA	ENSG00000013588.5	gene	1.38985
A2780	AZA	ENSG00000013619.11	gene	-3.95957
A2780	AZA	ENSG00000013810.16	gene	0.171689
A2780	AZA	ENSG00000014123.9	gene	0.343306
A2780	AZA	ENSG00000014138.6	gene	0.226993
A2780	AZA	ENSG00000014164.6	gene	0.22783
A2780	AZA	ENSG00000014216.13	gene	0.530027
A2780	AZA	ENSG00000014641.15	gene	0.461427
A2780	AZA	ENSG00000014824.11	gene	-1.49267e-05
A2780	AZA	ENSG00000014914.17	gene	0.370625
A2780	AZA	ENSG00000014919.10	gene	-0.132784
A2780	AZA	ENSG00000015133.16	gene	-0.56913
A2780	AZA	ENSG00000015153.12	gene	0.396714
A2780	AZA	ENSG00000015171.16	gene	-0.212072
A2780	AZA	ENSG00000015285.8	gene	-3.10198
A2780	AZA	ENSG00000015413.7	gene	4.24731
A2780	AZA	ENSG00000015475.16	gene	0.0290102
A2780	AZA	ENSG00000015479.15	gene	0.0980906
A2780	AZA	ENSG00000015520.12	gene	1.80483
A2780	AZA	ENSG00000015532.7	gene	-0.0666388
A2780	AZA	ENSG00000015568.10	gene	0.239432
A2780	AZA	ENSG00000015676.15	gene	-0.177891
A2780	AZA	ENSG00000016082.12	gene	-0.567282
A2780	AZA	ENSG00000016391.8	gene	-1.23464
A2780	AZA	ENSG00000016402.10	gene	4.24731
A2780	AZA	ENSG00000016864.14	gene	0.123709
A2780	AZA	ENSG00000017260.17	gene	-0.0480041
A2780	AZA	ENSG00000017483.12	gene	2.21992
A2780	AZA	ENSG00000017797.9	gene	0.558645
A2780	AZA	ENSG00000018189.10	gene	0.0915404
A2780	AZA	ENSG00000018236.12	gene	2.48295
A2780	AZA	ENSG00000018408.12	gene	0.385238
A2780	AZA	ENSG00000018510.10	gene	0.296494
A2780	AZA	ENSG00000018610.11	gene	0.674118
A2780	AZA	ENSG00000018625.12	gene	1.94239
A2780	AZA	ENSG00000018699.9	gene	0.292519
A2780	AZA	ENSG00000018869.14	gene	0.88735
A2780	AZA	ENSG00000019144.14	gene	0.672953
A2780	AZA	ENSG00000019186.7	gene	1.80483
A2780	AZA	ENSG00000019485.10	gene	-0.956231
A2780	AZA	ENSG00000019549.6	gene	-0.444404
A2780	AZA	ENSG00000019582.12	gene	4.19391
A2780	AZA	ENSG00000019991.13	gene	-0.178837
A2780	AZA	ENSG00000019995.6	gene	0.0203675
A2780	AZA	ENSG00000020129.13	gene	-0.371757
A2780	AZA	ENSG00000020181.15	gene	-0.328882
A2780	AZA	ENSG00000020256.17	gene	-0.481176
A2780	AZA	ENSG00000020426.8	gene	0.548379
A2780	AZA	ENSG00000020577.11	gene	0.421034
A2780	AZA	ENSG00000020633.16	gene	3.80484
A2780	AZA	ENSG00000020922.10	gene	-0.114783
A2780	AZA	ENSG00000021300.11	gene	0.961006
A2780	AZA	ENSG00000021355.10	gene	5.24228
A2780	AZA	ENSG00000021488.10	gene	-1.517
A2780	AZA	ENSG00000021574.9	gene	0.19263
A2780	AZA	ENSG00000021645.15	gene	0.603255
A2780	AZA	ENSG00000021762.17	gene	-1.46813
A2780	AZA	ENSG00000021776.8	gene	0.323259
A2780	AZA	ENSG00000021826.12	gene	-1.89172
A2780	AZA	ENSG00000022267.14	gene	0.340001
A2780	AZA	ENSG00000022277.10	gene	0.380263
A2780	AZA	ENSG00000022355.12	gene	-1.78003
A2780	AZA	ENSG00000022556.13	gene	0.679681
A2780	AZA	ENSG00000022567.7	gene	-0.166731
A2780	AZA	ENSG00000022840.13	gene	0.0641783
A2780	AZA	ENSG00000022976.13	gene	-0.528058
A2780	AZA	ENSG00000023041.9	gene	-0.0686034
A2780	AZA	ENSG00000023171.12	gene	5.24739
A2780	AZA	ENSG00000023191.14	gene	0.134194
A2780	AZA	ENSG00000023228.11	gene	0.289215
A2780	AZA	ENSG00000023287.10	gene	0.348467
A2780	AZA	ENSG00000023318.7	gene	0.0746631
A2780	AZA	ENSG00000023330.12	gene	0.510303
A2780	AZA	ENSG00000023445.11	gene	3.87812
A2780	AZA	ENSG00000023516.8	gene	0.0917967
A2780	AZA	ENSG00000023572.6	gene	0.311533
A2780	AZA	ENSG00000023608.4	gene	0.476911
A2780	AZA	ENSG00000023697.10	gene	0.362528
A2780	AZA	ENSG00000023734.8	gene	0.16446
A2780	AZA	ENSG00000023839.8	gene	0.389852
A2780	AZA	ENSG00000023892.10	gene	0.95689
A2780	AZA	ENSG00000023902.11	gene	-0.062634
A2780	AZA	ENSG00000023909.7	gene	0.765716
A2780	AZA	ENSG00000024048.8	gene	0.292005
A2780	AZA	ENSG00000024422.9	gene	1.21992
A2780	AZA	ENSG00000024526.14	gene	0.363311
A2780	AZA	ENSG00000024862.14	gene	0.287489
A2780	AZA	ENSG00000025039.12	gene	-0.58313
A2780	AZA	ENSG00000025156.10	gene	0.0156333
A2780	AZA	ENSG00000025293.13	gene	0.627172
A2780	AZA	ENSG00000025423.9	gene	1.08052
A2780	AZA	ENSG00000025434.16	gene	-0.222249
A2780	AZA	ENSG00000025708.10	gene	5.87095
A2780	AZA	ENSG00000025770.16	gene	0.359687
A2780	AZA	ENSG00000025772.7	gene	0.658262
A2780	AZA	ENSG00000025796.11	gene	-0.586616
A2780	AZA	ENSG00000025800.11	gene	0.362655
A2780	AZA	ENSG00000026025.11	gene	-0.15457
A2780	AZA	ENSG00000026036.18	gene	0.0986186
A2780	AZA	ENSG00000026103.17	gene	0.688921
A2780	AZA	ENSG00000026297.13	gene	-0.646808
A2780	AZA	ENSG00000026508.14	gene	5.56933
A2780	AZA	ENSG00000026559.11	gene	-0.679044
A2780	AZA	ENSG00000026652.11	gene	-0.11526
A2780	AZA	ENSG00000026950.14	gene	0.197293
A2780	AZA	ENSG00000027001.7	gene	-0.298861
A2780	AZA	ENSG00000027075.11	gene	-0.0174968
A2780	AZA	ENSG00000027644.4	gene	0.126822
A2780	AZA	ENSG00000027697.10	gene	0.398673
A2780	AZA	ENSG00000027847.11	gene	0.379582
A2780	AZA	ENSG00000027869.9	gene	0.500035
A2780	AZA	ENSG00000028116.14	gene	0.121019
A2780	AZA	ENSG00000028137.14	gene	7.63978
A2780	AZA	ENSG00000028203.15	gene	0.145315
A2780	AZA	ENSG00000028277.18	gene	2.18339
A2780	AZA	ENSG00000028310.15	gene	-0.114297
A2780	AZA	ENSG00000028528.12	gene	-0.223927
A2780	AZA	ENSG00000028839.7	gene	0.63205
A2780	AZA	ENSG00000029153.12	gene	0.570999
A2780	AZA	ENSG00000029363.13	gene	0.306497
A2780	AZA	ENSG00000029364.9	gene	0.371182
A2780	AZA	ENSG00000029534.17	gene	0.541852
A2780	AZA	ENSG00000029639.8	gene	0.260141
A2780	AZA	ENSG00000029725.14	gene	-0.0415876
A2780	AZA	ENSG00000029993.12	gene	0.326803
A2780	AZA	ENSG00000030066.11	gene	-0.220466
A2780	AZA	ENSG00000030110.10	gene	0.926449
A2780	AZA	ENSG00000030419.14	gene	0.961536
A2780	AZA	ENSG00000030582.14	gene	0.304084
A2780	AZA	ENSG00000031003.8	gene	-0.145735
A2780	AZA	ENSG00000031081.8	gene	2.50532
A2780	AZA	ENSG00000031691.6	gene	-0.379988
A2780	AZA	ENSG00000031698.10	gene	0.204852
A2780	AZA	ENSG00000031823.12	gene	-0.188987
A2780	AZA	ENSG00000032219.16	gene	-0.0166187
A2780	AZA	ENSG00000032389.10	gene	0.0712036
A2780	AZA	ENSG00000032444.13	gene	-0.454757
A2780	AZA	ENSG00000032742.15	gene	-0.396237
A2780	AZA	ENSG00000033011.9	gene	-0.613717
A2780	AZA	ENSG00000033030.11	gene	0.0414995
A2780	AZA	ENSG00000033050.5	gene	0.00677026
A2780	AZA	ENSG00000033100.12	gene	-0.101094
A2780	AZA	ENSG00000033122.16	gene	0.679358
A2780	AZA	ENSG00000033170.14	gene	0.201467
A2780	AZA	ENSG00000033178.10	gene	0.276269
A2780	AZA	ENSG00000033327.10	gene	-0.715802
A2780	AZA	ENSG00000033627.12	gene	0.250202
A2780	AZA	ENSG00000033800.11	gene	0.0665917
A2780	AZA	ENSG00000033867.14	gene	0.963458
A2780	AZA	ENSG00000034053.12	gene	-0.461966
A2780	AZA	ENSG00000034152.16	gene	1.27796
A2780	AZA	ENSG00000034239.8	gene	-0.780069
A2780	AZA	ENSG00000034510.5	gene	2.10136
A2780	AZA	ENSG00000034533.9	gene	0.249189
A2780	AZA	ENSG00000034677.9	gene	0.284054
A2780	AZA	ENSG00000034693.12	gene	-0.133712
A2780	AZA	ENSG00000034713.5	gene	0.457221
A2780	AZA	ENSG00000034971.12	gene	1.38985
A2780	AZA	ENSG00000035115.19	gene	-0.868395
A2780	AZA	ENSG00000035141.5	gene	0.171817
A2780	AZA	ENSG00000035403.14	gene	0.721796
A2780	AZA	ENSG00000035499.10	gene	0.540025
A2780	AZA	ENSG00000035664.9	gene	0.689412
A2780	AZA	ENSG00000035681.5	gene	-0.106902
A2780	AZA	ENSG00000035687.9	gene	0.036144
A2780	AZA	ENSG00000035862.10	gene	-0.362408
A2780	AZA	ENSG00000035928.12	gene	0.148807
A2780	AZA	ENSG00000036054.10	gene	0.0999835
A2780	AZA	ENSG00000036257.10	gene	0.290691
A2780	AZA	ENSG00000036530.6	gene	0.804888
A2780	AZA	ENSG00000036549.10	gene	-0.120953
A2780	AZA	ENSG00000036672.13	gene	-0.021083
A2780	AZA	ENSG00000037042.8	gene	0.471379
A2780	AZA	ENSG00000037241.5	gene	0.68032
A2780	AZA	ENSG00000037280.13	gene	-0.506698
A2780	AZA	ENSG00000037474.12	gene	0.507126
A2780	AZA	ENSG00000037637.8	gene	0.0320013
A2780	AZA	ENSG00000037749.9	gene	0.128584
A2780	AZA	ENSG00000037757.11	gene	0.291333
A2780	AZA	ENSG00000037897.14	gene	0.0458957
A2780	AZA	ENSG00000037965.5	gene	-1.155
A2780	AZA	ENSG00000038002.6	gene	0.359747
A2780	AZA	ENSG00000038210.11	gene	0.429595
A2780	AZA	ENSG00000038219.10	gene	-0.04553
A2780	AZA	ENSG00000038274.14	gene	0.250327
A2780	AZA	ENSG00000038295.5	gene	-0.332607
A2780	AZA	ENSG00000038358.12	gene	0.0781062
A2780	AZA	ENSG00000038382.15	gene	-0.160755
A2780	AZA	ENSG00000038427.13	gene	-0.0690339
A2780	AZA	ENSG00000038532.12	gene	-0.119687
A2780	AZA	ENSG00000038945.12	gene	-0.200651
A2780	AZA	ENSG00000039068.16	gene	4.12677
A2780	AZA	ENSG00000039123.13	gene	0.113776
A2780	AZA	ENSG00000039139.9	gene	-1.06958
A2780	AZA	ENSG00000039319.14	gene	0.3691
A2780	AZA	ENSG00000039523.15	gene	0.0168324
A2780	AZA	ENSG00000039560.11	gene	0.75808
A2780	AZA	ENSG00000039650.7	gene	0.0447581
A2780	AZA	ENSG00000040199.16	gene	0.456054
A2780	AZA	ENSG00000040275.14	gene	0.162838
A2780	AZA	ENSG00000040341.15	gene	-0.246644
A2780	AZA	ENSG00000040487.10	gene	0.137463
A2780	AZA	ENSG00000040531.12	gene	-0.195113
A2780	AZA	ENSG00000040608.11	gene	0.0886837
A2780	AZA	ENSG00000040633.10	gene	-0.11474
A2780	AZA	ENSG00000040731.8	gene	0.474289
A2780	AZA	ENSG00000040933.13	gene	0.00423283
A2780	AZA	ENSG00000041357.13	gene	0.907424
A2780	AZA	ENSG00000041515.13	gene	5.56933
A2780	AZA	ENSG00000041802.8	gene	0.280002
A2780	AZA	ENSG00000041880.12	gene	1.23809
A2780	AZA	ENSG00000041982.12	gene	-0.614064
A2780	AZA	ENSG00000041988.13	gene	0.164783
A2780	AZA	ENSG00000042062.9	gene	0.417867
A2780	AZA	ENSG00000042088.11	gene	-0.433968
A2780	AZA	ENSG00000042286.12	gene	0.965353
A2780	AZA	ENSG00000042317.14	gene	0.430039
A2780	AZA	ENSG00000042429.8	gene	0.159144
A2780	AZA	ENSG00000042445.11	gene	0.183674
A2780	AZA	ENSG00000042493.13	gene	1.77172
A2780	AZA	ENSG00000042753.9	gene	0.790289
A2780	AZA	ENSG00000042781.10	gene	0.831687
A2780	AZA	ENSG00000042832.9	gene	0.804885
A2780	AZA	ENSG00000042980.10	gene	5.24739
A2780	AZA	ENSG00000043039.6	gene	0.335405
A2780	AZA	ENSG00000043093.11	gene	0.275559
A2780	AZA	ENSG00000043143.18	gene	1.02114
A2780	AZA	ENSG00000043355.8	gene	-1.14264
A2780	AZA	ENSG00000043514.13	gene	0.11976
A2780	AZA	ENSG00000043591.5	gene	-0.1951
A2780	AZA	ENSG00000044090.6	gene	-0.761615
A2780	AZA	ENSG00000044115.18	gene	0.475942
A2780	AZA	ENSG00000044446.9	gene	-0.246678
A2780	AZA	ENSG00000044459.12	gene	0.0321844
A2780	AZA	ENSG00000044524.8	gene	-0.432881
A2780	AZA	ENSG00000044574.7	gene	-0.0626559
A2780	AZA	ENSG00000046604.10	gene	-1.19998
A2780	AZA	ENSG00000046647.11	gene	-0.187418
A2780	AZA	ENSG00000046651.12	gene	-0.0592895
A2780	AZA	ENSG00000046653.12	gene	0.705353
A2780	AZA	ENSG00000046774.9	gene	6.33879
A2780	AZA	ENSG00000046889.16	gene	-1.01008
A2780	AZA	ENSG00000047056.12	gene	-0.0559505
A2780	AZA	ENSG00000047188.13	gene	-0.0579346
A2780	AZA	ENSG00000047230.12	gene	-0.613672
A2780	AZA	ENSG00000047249.14	gene	0.293297
A2780	AZA	ENSG00000047315.12	gene	0.164892
A2780	AZA	ENSG00000047346.10	gene	0.575753
A2780	AZA	ENSG00000047365.9	gene	2.38985
A2780	AZA	ENSG00000047410.11	gene	-0.320537
A2780	AZA	ENSG00000047457.11	gene	-1.155
A2780	AZA	ENSG00000047578.10	gene	-0.203077
A2780	AZA	ENSG00000047579.17	gene	-0.0364152
A2780	AZA	ENSG00000047597.5	gene	-0.0431061
A2780	AZA	ENSG00000047621.9	gene	0.0255223
A2780	AZA	ENSG00000047634.12	gene	3.54183
A2780	AZA	ENSG00000047644.15	gene	-0.641111
A2780	AZA	ENSG00000047648.19	gene	0.541855
A2780	AZA	ENSG00000047662.4	gene	0.345458
A2780	AZA	ENSG00000047849.19	gene	-0.0408503
A2780	AZA	ENSG00000047932.11	gene	0.0560031
A2780	AZA	ENSG00000048028.9	gene	0.283511
A2780	AZA	ENSG00000048052.19	gene	0.366826
A2780	AZA	ENSG00000048140.15	gene	1.71373e-05
A2780	AZA	ENSG00000048162.17	gene	0.384374
A2780	AZA	ENSG00000048342.13	gene	-1.15759
A2780	AZA	ENSG00000048392.9	gene	1.46584
A2780	AZA	ENSG00000048405.7	gene	-0.121113
A2780	AZA	ENSG00000048471.11	gene	0.31946
A2780	AZA	ENSG00000048540.12	gene	-1.20445
A2780	AZA	ENSG00000048544.5	gene	0.507657
A2780	AZA	ENSG00000048545.11	gene	5.24739
A2780	AZA	ENSG00000048649.11	gene	-0.308721
A2780	AZA	ENSG00000048707.11	gene	0.0690236
A2780	AZA	ENSG00000048740.15	gene	2.21992
A2780	AZA	ENSG00000048828.14	gene	0.269723
A2780	AZA	ENSG00000048991.14	gene	-0.272419
A2780	AZA	ENSG00000049089.11	gene	3.54738
A2780	AZA	ENSG00000049130.11	gene	-0.0321284
A2780	AZA	ENSG00000049167.11	gene	-0.201483
A2780	AZA	ENSG00000049192.12	gene	0.553811
A2780	AZA	ENSG00000049239.10	gene	-0.962235
A2780	AZA	ENSG00000049245.10	gene	0.637221
A2780	AZA	ENSG00000049246.12	gene	-1.03197
A2780	AZA	ENSG00000049249.6	gene	6.24743
A2780	AZA	ENSG00000049283.15	gene	2.80483
A2780	AZA	ENSG00000049323.13	gene	0.00226952
A2780	AZA	ENSG00000049449.6	gene	-0.188614
A2780	AZA	ENSG00000049541.8	gene	0.252812
A2780	AZA	ENSG00000049618.19	gene	-0.547446
A2780	AZA	ENSG00000049656.11	gene	0.856553
A2780	AZA	ENSG00000049759.14	gene	-0.387599
A2780	AZA	ENSG00000049768.12	gene	-0.00245953
A2780	AZA	ENSG00000049769.10	gene	-0.942341
A2780	AZA	ENSG00000049860.11	gene	0.181582
A2780	AZA	ENSG00000049883.12	gene	-0.338566
A2780	AZA	ENSG00000050030.11	gene	-0.245325
A2780	AZA	ENSG00000050130.15	gene	0.293725
A2780	AZA	ENSG00000050165.15	gene	1.13372
A2780	AZA	ENSG00000050327.12	gene	4.24731
A2780	AZA	ENSG00000050344.8	gene	0.0697145
A2780	AZA	ENSG00000050393.9	gene	0.075008
A2780	AZA	ENSG00000050405.11	gene	0.181616
A2780	AZA	ENSG00000050426.13	gene	-0.511786
A2780	AZA	ENSG00000050438.14	gene	1.49676
A2780	AZA	ENSG00000050555.15	gene	0.954265
A2780	AZA	ENSG00000050628.18	gene	5.24739
A2780	AZA	ENSG00000050730.13	gene	-0.23204
A2780	AZA	ENSG00000050748.15	gene	0.035097
A2780	AZA	ENSG00000050767.13	gene	-1.70497
A2780	AZA	ENSG00000050820.14	gene	0.326053
A2780	AZA	ENSG00000051009.8	gene	-0.615151
A2780	AZA	ENSG00000051108.12	gene	-0.657832
A2780	AZA	ENSG00000051128.16	gene	-0.277054
A2780	AZA	ENSG00000051180.14	gene	-0.102004
A2780	AZA	ENSG00000051341.11	gene	0.0630601
A2780	AZA	ENSG00000051382.6	gene	0.951427
A2780	AZA	ENSG00000051523.8	gene	4.55976
A2780	AZA	ENSG00000051596.7	gene	0.358553
A2780	AZA	ENSG00000051620.8	gene	0.478158
A2780	AZA	ENSG00000051825.12	gene	0.0744528
A2780	AZA	ENSG00000052126.12	gene	-0.146637
A2780	AZA	ENSG00000052344.13	gene	2.24545
A2780	AZA	ENSG00000052723.9	gene	-0.0899506
A2780	AZA	ENSG00000052749.11	gene	0.580475
A2780	AZA	ENSG00000052795.10	gene	-0.135672
A2780	AZA	ENSG00000052802.10	gene	0.730376
A2780	AZA	ENSG00000052841.12	gene	-0.358145
A2780	AZA	ENSG00000052850.5	gene	-2.05309
A2780	AZA	ENSG00000053108.14	gene	5.24739
A2780	AZA	ENSG00000053254.13	gene	-0.319264
A2780	AZA	ENSG00000053328.8	gene	0.319465
A2780	AZA	ENSG00000053371.10	gene	0.332134
A2780	AZA	ENSG00000053372.4	gene	0.0785542
A2780	AZA	ENSG00000053438.8	gene	4.1268
A2780	AZA	ENSG00000053501.10	gene	-0.178434
A2780	AZA	ENSG00000053524.9	gene	0.844965
A2780	AZA	ENSG00000053702.12	gene	1.38983
A2780	AZA	ENSG00000053747.13	gene	0.426379
A2780	AZA	ENSG00000053770.9	gene	0.162708
A2780	AZA	ENSG00000053900.8	gene	-0.0629515
A2780	AZA	ENSG00000053918.13	gene	0.219929
A2780	AZA	ENSG00000054116.9	gene	0.198523
A2780	AZA	ENSG00000054118.11	gene	0.219924
A2780	AZA	ENSG00000054148.15	gene	0.0240852
A2780	AZA	ENSG00000054179.9	gene	6.24743
A2780	AZA	ENSG00000054267.18	gene	0.2286
A2780	AZA	ENSG00000054277.10	gene	0.649236
A2780	AZA	ENSG00000054282.13	gene	-0.502781
A2780	AZA	ENSG00000054356.11	gene	2.3898
A2780	AZA	ENSG00000054392.10	gene	1.71742
A2780	AZA	ENSG00000054523.14	gene	0.105711
A2780	AZA	ENSG00000054598.6	gene	-0.0866288
A2780	AZA	ENSG00000054611.11	gene	-0.163001
A2780	AZA	ENSG00000054654.13	gene	-0.231185
A2780	AZA	ENSG00000054690.11	gene	-0.327421
A2780	AZA	ENSG00000054793.11	gene	-0.280807
A2780	AZA	ENSG00000054965.8	gene	-0.0687364
A2780	AZA	ENSG00000054967.10	gene	0.117675
A2780	AZA	ENSG00000054983.14	gene	0.118995
A2780	AZA	ENSG00000055044.8	gene	0.112727
A2780	AZA	ENSG00000055070.14	gene	-0.0748828
A2780	AZA	ENSG00000055118.12	gene	-1.09007
A2780	AZA	ENSG00000055130.13	gene	0.185118
A2780	AZA	ENSG00000055147.15	gene	0.618473
A2780	AZA	ENSG00000055163.16	gene	1.25411
A2780	AZA	ENSG00000055208.15	gene	-0.21098
A2780	AZA	ENSG00000055211.10	gene	-0.048137
A2780	AZA	ENSG00000055332.14	gene	0.312359
A2780	AZA	ENSG00000055483.17	gene	-0.773072
A2780	AZA	ENSG00000055609.15	gene	-0.0828002
A2780	AZA	ENSG00000055732.10	gene	-0.676002
A2780	AZA	ENSG00000055813.5	gene	-1.51703
A2780	AZA	ENSG00000055917.13	gene	-0.316801
A2780	AZA	ENSG00000055950.14	gene	0.0463442
A2780	AZA	ENSG00000055955.13	gene	-1.45813
A2780	AZA	ENSG00000055957.8	gene	-1.00244
A2780	AZA	ENSG00000056050.6	gene	-0.140507
A2780	AZA	ENSG00000056097.13	gene	0.0136798
A2780	AZA	ENSG00000056277.13	gene	-0.126102
A2780	AZA	ENSG00000056291.15	gene	1.38984
A2780	AZA	ENSG00000056487.13	gene	-1.00749
A2780	AZA	ENSG00000056558.8	gene	1.62046
A2780	AZA	ENSG00000056586.13	gene	-0.0647841
A2780	AZA	ENSG00000056736.7	gene	-2.51703
A2780	AZA	ENSG00000056972.16	gene	0.828734
A2780	AZA	ENSG00000056998.16	gene	0.0849001
A2780	AZA	ENSG00000057019.13	gene	-0.284182
A2780	AZA	ENSG00000057252.10	gene	0.310067
A2780	AZA	ENSG00000057294.11	gene	-1.06956
A2780	AZA	ENSG00000057468.6	gene	0.71469
A2780	AZA	ENSG00000057593.11	gene	0.319465
A2780	AZA	ENSG00000057608.14	gene	0.0152555
A2780	AZA	ENSG00000057657.12	gene	3.12681
A2780	AZA	ENSG00000057663.10	gene	0.180191
A2780	AZA	ENSG00000057704.8	gene	-1.67855
A2780	AZA	ENSG00000057757.7	gene	0.381785
A2780	AZA	ENSG00000057935.11	gene	0.0965886
A2780	AZA	ENSG00000058056.6	gene	-0.403274
A2780	AZA	ENSG00000058063.13	gene	0.0906408
A2780	AZA	ENSG00000058085.12	gene	6.09024
A2780	AZA	ENSG00000058091.14	gene	0.582497
A2780	AZA	ENSG00000058262.7	gene	-0.140376
A2780	AZA	ENSG00000058272.13	gene	0.0215995
A2780	AZA	ENSG00000058335.13	gene	0.804882
A2780	AZA	ENSG00000058404.17	gene	-0.417499
A2780	AZA	ENSG00000058453.14	gene	0.691404
A2780	AZA	ENSG00000058600.13	gene	-0.225609
A2780	AZA	ENSG00000058668.12	gene	0.303944
A2780	AZA	ENSG00000058673.13	gene	0.0486205
A2780	AZA	ENSG00000058729.8	gene	-0.0348738
A2780	AZA	ENSG00000058799.11	gene	0.582494
A2780	AZA	ENSG00000058804.11	gene	-0.270686
A2780	AZA	ENSG00000058866.12	gene	0.0343694
A2780	AZA	ENSG00000059122.14	gene	0.122527
A2780	AZA	ENSG00000059145.16	gene	0.28463
A2780	AZA	ENSG00000059377.13	gene	0.319465
A2780	AZA	ENSG00000059378.10	gene	10.3763
A2780	AZA	ENSG00000059573.6	gene	0.0551915
A2780	AZA	ENSG00000059588.7	gene	-0.404922
A2780	AZA	ENSG00000059691.9	gene	-0.0425556
A2780	AZA	ENSG00000059728.8	gene	-0.118841
A2780	AZA	ENSG00000059758.5	gene	0.335523
A2780	AZA	ENSG00000059769.17	gene	0.425508
A2780	AZA	ENSG00000059804.13	gene	-0.280547
A2780	AZA	ENSG00000059915.14	gene	0.869018
A2780	AZA	ENSG00000060069.14	gene	-0.0176547
A2780	AZA	ENSG00000060138.10	gene	-0.170131
A2780	AZA	ENSG00000060140.6	gene	0.067928
A2780	AZA	ENSG00000060237.14	gene	-0.188388
A2780	AZA	ENSG00000060303.5	gene	-2.78003
A2780	AZA	ENSG00000060339.11	gene	0.254715
A2780	AZA	ENSG00000060491.14	gene	0.000396951
A2780	AZA	ENSG00000060558.3	gene	-0.195101
A2780	AZA	ENSG00000060642.8	gene	-0.0576093
A2780	AZA	ENSG00000060656.17	gene	0.87971
A2780	AZA	ENSG00000060688.10	gene	0.30717
A2780	AZA	ENSG00000060718.16	gene	1.53155
A2780	AZA	ENSG00000060749.12	gene	-0.350561
A2780	AZA	ENSG00000060762.16	gene	0.600529
A2780	AZA	ENSG00000060971.15	gene	0.239746
A2780	AZA	ENSG00000060982.12	gene	0.061634
A2780	AZA	ENSG00000061273.15	gene	-0.154471
A2780	AZA	ENSG00000061337.13	gene	2.38985
A2780	AZA	ENSG00000061455.10	gene	0.482962
A2780	AZA	ENSG00000061656.7	gene	-0.780072
A2780	AZA	ENSG00000061676.12	gene	0.231779
A2780	AZA	ENSG00000061794.10	gene	0.284845
A2780	AZA	ENSG00000061918.10	gene	3.80484
A2780	AZA	ENSG00000061936.7	gene	-0.0611592
A2780	AZA	ENSG00000061938.14	gene	-0.801608
A2780	AZA	ENSG00000061987.12	gene	0.191669
A2780	AZA	ENSG00000062038.11	gene	-0.0695748
A2780	AZA	ENSG00000062194.13	gene	0.425412
A2780	AZA	ENSG00000062282.12	gene	-0.462591
A2780	AZA	ENSG00000062370.14	gene	-0.230487
A2780	AZA	ENSG00000062485.16	gene	-0.0509979
A2780	AZA	ENSG00000062524.13	gene	2.84927
A2780	AZA	ENSG00000062582.11	gene	0.0740747
A2780	AZA	ENSG00000062598.15	gene	-0.368273
A2780	AZA	ENSG00000062650.15	gene	0.121274
A2780	AZA	ENSG00000062716.8	gene	1.07342
A2780	AZA	ENSG00000062725.7	gene	0.123708
A2780	AZA	ENSG00000062822.10	gene	0.124676
A2780	AZA	ENSG00000063046.15	gene	-0.532999
A2780	AZA	ENSG00000063127.13	gene	-0.490569
A2780	AZA	ENSG00000063169.8	gene	-1.2655
A2780	AZA	ENSG00000063176.13	gene	-0.522277
A2780	AZA	ENSG00000063177.10	gene	-0.180732
A2780	AZA	ENSG00000063180.6	gene	-0.489374
A2780	AZA	ENSG00000063241.5	gene	0.419597
A2780	AZA	ENSG00000063244.10	gene	0.398085
A2780	AZA	ENSG00000063245.12	gene	-0.299656
A2780	AZA	ENSG00000063322.11	gene	0.00929747
A2780	AZA	ENSG00000063438.14	gene	-0.169116
A2780	AZA	ENSG00000063587.13	gene	0.0572738
A2780	AZA	ENSG00000063601.14	gene	0.112785
A2780	AZA	ENSG00000063660.6	gene	0.307057
A2780	AZA	ENSG00000063761.13	gene	-0.0375714
A2780	AZA	ENSG00000063854.10	gene	0.0851746
A2780	AZA	ENSG00000063978.13	gene	0.381527
A2780	AZA	ENSG00000064012.19	gene	0.311498
A2780	AZA	ENSG00000064042.15	gene	-0.254002
A2780	AZA	ENSG00000064102.12	gene	0.235951
A2780	AZA	ENSG00000064115.8	gene	0.550219
A2780	AZA	ENSG00000064195.7	gene	-0.195101
A2780	AZA	ENSG00000064199.4	gene	0.846951
A2780	AZA	ENSG00000064205.8	gene	1.80483
A2780	AZA	ENSG00000064225.10	gene	0.804889
A2780	AZA	ENSG00000064270.10	gene	-0.195101
A2780	AZA	ENSG00000064300.6	gene	1.31185
A2780	AZA	ENSG00000064309.12	gene	-0.860322
A2780	AZA	ENSG00000064313.9	gene	0.646624
A2780	AZA	ENSG00000064393.13	gene	0.353323
A2780	AZA	ENSG00000064419.11	gene	-0.0384159
A2780	AZA	ENSG00000064489.19	gene	-0.870272
A2780	AZA	ENSG00000064490.11	gene	-0.0787893
A2780	AZA	ENSG00000064545.12	gene	0.0733759
A2780	AZA	ENSG00000064547.11	gene	0.0458992
A2780	AZA	ENSG00000064601.14	gene	0.258427
A2780	AZA	ENSG00000064607.14	gene	-0.235093
A2780	AZA	ENSG00000064651.11	gene	0.0490025
A2780	AZA	ENSG00000064652.8	gene	-0.0334601
A2780	AZA	ENSG00000064666.12	gene	-0.242977
A2780	AZA	ENSG00000064687.10	gene	-0.325743
A2780	AZA	ENSG00000064703.9	gene	-0.216313
A2780	AZA	ENSG00000064726.7	gene	0.366614
A2780	AZA	ENSG00000064763.8	gene	0.293388
A2780	AZA	ENSG00000064787.10	gene	4.09246
A2780	AZA	ENSG00000064835.8	gene	0.0779074
A2780	AZA	ENSG00000064932.13	gene	0.527205
A2780	AZA	ENSG00000064933.14	gene	-0.608642
A2780	AZA	ENSG00000064961.16	gene	0.276364
A2780	AZA	ENSG00000064989.10	gene	-0.883415
A2780	AZA	ENSG00000064995.14	gene	0.455184
A2780	AZA	ENSG00000064999.13	gene	0.0636963
A2780	AZA	ENSG00000065000.13	gene	-0.046055
A2780	AZA	ENSG00000065029.12	gene	-0.34969
A2780	AZA	ENSG00000065054.11	gene	0.501107
A2780	AZA	ENSG00000065057.5	gene	-0.290269
A2780	AZA	ENSG00000065060.14	gene	0.0478829
A2780	AZA	ENSG00000065135.8	gene	0.521767
A2780	AZA	ENSG00000065150.16	gene	-0.2342
A2780	AZA	ENSG00000065154.9	gene	0.436846
A2780	AZA	ENSG00000065183.13	gene	0.335099
A2780	AZA	ENSG00000065243.16	gene	-0.15309
A2780	AZA	ENSG00000065268.8	gene	-0.234032
A2780	AZA	ENSG00000065308.4	gene	0.204564
A2780	AZA	ENSG00000065320.6	gene	3.21991
A2780	AZA	ENSG00000065328.14	gene	0.15228
A2780	AZA	ENSG00000065357.17	gene	0.227251
A2780	AZA	ENSG00000065361.12	gene	-0.348359
A2780	AZA	ENSG00000065413.14	gene	0.0824217
A2780	AZA	ENSG00000065427.12	gene	0.202183
A2780	AZA	ENSG00000065457.8	gene	0.103006
A2780	AZA	ENSG00000065485.15	gene	0.222249
A2780	AZA	ENSG00000065491.8	gene	0.227744
A2780	AZA	ENSG00000065518.7	gene	0.525427
A2780	AZA	ENSG00000065526.8	gene	-0.172564
A2780	AZA	ENSG00000065534.16	gene	1.123
A2780	AZA	ENSG00000065548.15	gene	0.320713
A2780	AZA	ENSG00000065559.12	gene	0.349021
A2780	AZA	ENSG00000065600.10	gene	0.037481
A2780	AZA	ENSG00000065609.12	gene	-0.0576046
A2780	AZA	ENSG00000065613.11	gene	0.35307
A2780	AZA	ENSG00000065615.11	gene	0.850211
A2780	AZA	ENSG00000065618.14	gene	6.56937
A2780	AZA	ENSG00000065621.12	gene	2.0779
A2780	AZA	ENSG00000065665.18	gene	0.707276
A2780	AZA	ENSG00000065675.12	gene	5.24739
A2780	AZA	ENSG00000065717.12	gene	-1.51704
A2780	AZA	ENSG00000065802.9	gene	-0.155134
A2780	AZA	ENSG00000065809.11	gene	0.0263289
A2780	AZA	ENSG00000065833.8	gene	-0.126401
A2780	AZA	ENSG00000065882.13	gene	0.148567
A2780	AZA	ENSG00000065883.12	gene	-0.0864405
A2780	AZA	ENSG00000065911.9	gene	0.107647
A2780	AZA	ENSG00000065923.7	gene	0.476726
A2780	AZA	ENSG00000065970.6	gene	-0.185365
A2780	AZA	ENSG00000065978.15	gene	0.418983
A2780	AZA	ENSG00000065989.13	gene	-0.290001
A2780	AZA	ENSG00000066027.9	gene	0.284054
A2780	AZA	ENSG00000066032.16	gene	-0.619084
A2780	AZA	ENSG00000066044.11	gene	-0.031554
A2780	AZA	ENSG00000066056.11	gene	5.83238
A2780	AZA	ENSG00000066084.10	gene	0.327119
A2780	AZA	ENSG00000066117.12	gene	-0.183526
A2780	AZA	ENSG00000066135.10	gene	0.106171
A2780	AZA	ENSG00000066136.17	gene	-0.426095
A2780	AZA	ENSG00000066185.10	gene	0.319465
A2780	AZA	ENSG00000066230.8	gene	-5.33813
A2780	AZA	ENSG00000066248.12	gene	-1.28862
A2780	AZA	ENSG00000066279.14	gene	-0.0490245
A2780	AZA	ENSG00000066294.12	gene	2.80483
A2780	AZA	ENSG00000066322.10	gene	0.843157
A2780	AZA	ENSG00000066379.12	gene	-0.365037
A2780	AZA	ENSG00000066382.14	gene	-2.46811
A2780	AZA	ENSG00000066405.10	gene	2.3898
A2780	AZA	ENSG00000066422.4	gene	0.406746
A2780	AZA	ENSG00000066427.19	gene	-0.0288132
A2780	AZA	ENSG00000066455.10	gene	0.254937
A2780	AZA	ENSG00000066468.18	gene	4.83232
A2780	AZA	ENSG00000066557.5	gene	0.416553
A2780	AZA	ENSG00000066583.9	gene	1.06792
A2780	AZA	ENSG00000066629.14	gene	-0.297968
A2780	AZA	ENSG00000066651.15	gene	0.368154
A2780	AZA	ENSG00000066654.10	gene	0.354642
A2780	AZA	ENSG00000066697.12	gene	0.0206152
A2780	AZA	ENSG00000066735.12	gene	-0.680537
A2780	AZA	ENSG00000066739.9	gene	-0.073731
A2780	AZA	ENSG00000066777.6	gene	0.175106
A2780	AZA	ENSG00000066827.13	gene	1.46636
A2780	AZA	ENSG00000066855.13	gene	0.716967
A2780	AZA	ENSG00000066923.15	gene	1.38508
A2780	AZA	ENSG00000066926.8	gene	0.510027
A2780	AZA	ENSG00000066933.13	gene	0.113248
A2780	AZA	ENSG00000067057.14	gene	0.588678
A2780	AZA	ENSG00000067064.8	gene	0.52593
A2780	AZA	ENSG00000067066.14	gene	1.89531
A2780	AZA	ENSG00000067082.12	gene	-0.658454
A2780	AZA	ENSG00000067113.14	gene	0.327409
A2780	AZA	ENSG00000067141.14	gene	-0.849401
A2780	AZA	ENSG00000067167.5	gene	-0.0454704
A2780	AZA	ENSG00000067177.12	gene	0.00717234
A2780	AZA	ENSG00000067182.5	gene	0.295148
A2780	AZA	ENSG00000067191.13	gene	-0.310589
A2780	AZA	ENSG00000067208.12	gene	0.329066
A2780	AZA	ENSG00000067221.11	gene	0.319463
A2780	AZA	ENSG00000067225.15	gene	0.280577
A2780	AZA	ENSG00000067248.7	gene	0.288057
A2780	AZA	ENSG00000067334.11	gene	0.182869
A2780	AZA	ENSG00000067365.12	gene	-0.33837
A2780	AZA	ENSG00000067369.11	gene	0.0480012
A2780	AZA	ENSG00000067445.18	gene	7.77102
A2780	AZA	ENSG00000067533.5	gene	0.0658351
A2780	AZA	ENSG00000067560.8	gene	0.0116167
A2780	AZA	ENSG00000067596.8	gene	0.435938
A2780	AZA	ENSG00000067601.7	gene	0.0576551
A2780	AZA	ENSG00000067606.13	gene	-0.185527
A2780	AZA	ENSG00000067704.9	gene	0.491837
A2780	AZA	ENSG00000067715.11	gene	0.361282
A2780	AZA	ENSG00000067798.11	gene	-0.976845
A2780	AZA	ENSG00000067829.16	gene	-0.19054
A2780	AZA	ENSG00000067836.10	gene	-0.130262
A2780	AZA	ENSG00000067840.10	gene	0.0519807
A2780	AZA	ENSG00000067842.15	gene	4.83232
A2780	AZA	ENSG00000067900.6	gene	0.200181
A2780	AZA	ENSG00000067955.11	gene	-0.402947
A2780	AZA	ENSG00000067992.10	gene	-0.471953
A2780	AZA	ENSG00000068001.11	gene	-0.0648906
A2780	AZA	ENSG00000068024.14	gene	-1.28074
A2780	AZA	ENSG00000068028.15	gene	-0.425892
A2780	AZA	ENSG00000068078.15	gene	1.00652
A2780	AZA	ENSG00000068079.5	gene	1.58952
A2780	AZA	ENSG00000068097.12	gene	-0.246375
A2780	AZA	ENSG00000068120.12	gene	0.54302
A2780	AZA	ENSG00000068137.12	gene	0.103279
A2780	AZA	ENSG00000068305.15	gene	-0.274524
A2780	AZA	ENSG00000068308.11	gene	-0.0455909
A2780	AZA	ENSG00000068323.14	gene	0.538493
A2780	AZA	ENSG00000068354.13	gene	0.0318526
A2780	AZA	ENSG00000068366.17	gene	0.722709
A2780	AZA	ENSG00000068383.16	gene	0.415675
A2780	AZA	ENSG00000068394.10	gene	0.585796
A2780	AZA	ENSG00000068400.11	gene	0.212606
A2780	AZA	ENSG00000068438.12	gene	0.532071
A2780	AZA	ENSG00000068489.10	gene	-0.350494
A2780	AZA	ENSG00000068615.14	gene	-0.382736
A2780	AZA	ENSG00000068650.16	gene	-0.631905
A2780	AZA	ENSG00000068654.13	gene	-0.239834
A2780	AZA	ENSG00000068697.6	gene	-0.14097
A2780	AZA	ENSG00000068724.13	gene	0.639828
A2780	AZA	ENSG00000068745.12	gene	0.31946
A2780	AZA	ENSG00000068781.18	gene	-0.387756
A2780	AZA	ENSG00000068784.10	gene	-0.263192
A2780	AZA	ENSG00000068796.14	gene	-0.200072
A2780	AZA	ENSG00000068831.16	gene	-1.2296
A2780	AZA	ENSG00000068878.12	gene	0.583579
A2780	AZA	ENSG00000068885.12	gene	-0.0875046
A2780	AZA	ENSG00000068903.17	gene	0.364845
A2780	AZA	ENSG00000068912.11	gene	0.380642
A2780	AZA	ENSG00000068971.11	gene	0.155961
A2780	AZA	ENSG00000068976.11	gene	-0.84904
A2780	AZA	ENSG00000068985.4	gene	8.60467
A2780	AZA	ENSG00000069011.13	gene	0.0430468
A2780	AZA	ENSG00000069020.16	gene	0.695263
A2780	AZA	ENSG00000069122.16	gene	4.24731
A2780	AZA	ENSG00000069188.14	gene	1.95173
A2780	AZA	ENSG00000069248.11	gene	-0.194294
A2780	AZA	ENSG00000069275.12	gene	-0.0461996
A2780	AZA	ENSG00000069329.13	gene	0.00662247
A2780	AZA	ENSG00000069345.9	gene	-0.0634025
A2780	AZA	ENSG00000069399.10	gene	0.660498
A2780	AZA	ENSG00000069424.12	gene	0.274374
A2780	AZA	ENSG00000069431.8	gene	0.804888
A2780	AZA	ENSG00000069493.12	gene	-0.630562
A2780	AZA	ENSG00000069509.5	gene	0.727029
A2780	AZA	ENSG00000069667.13	gene	-0.0251858
A2780	AZA	ENSG00000069702.8	gene	1.01477
A2780	AZA	ENSG00000069712.10	gene	0.231475
A2780	AZA	ENSG00000069812.9	gene	0.726886
A2780	AZA	ENSG00000069849.8	gene	0.477758
A2780	AZA	ENSG00000069869.13	gene	0.285234
A2780	AZA	ENSG00000069943.7	gene	-0.0707221
A2780	AZA	ENSG00000069956.9	gene	0.138858
A2780	AZA	ENSG00000069966.16	gene	-0.546585
A2780	AZA	ENSG00000069974.13	gene	0.513916
A2780	AZA	ENSG00000069998.10	gene	0.132461
A2780	AZA	ENSG00000070010.16	gene	0.360157
A2780	AZA	ENSG00000070018.6	gene	0.201729
A2780	AZA	ENSG00000070019.4	gene	-2.63767
A2780	AZA	ENSG00000070047.9	gene	0.0405146
A2780	AZA	ENSG00000070061.12	gene	0.234138
A2780	AZA	ENSG00000070081.13	gene	-0.197667
A2780	AZA	ENSG00000070087.11	gene	-0.23009
A2780	AZA	ENSG00000070159.11	gene	4.06791
A2780	AZA	ENSG00000070182.15	gene	2.38983
A2780	AZA	ENSG00000070190.10	gene	4.24731
A2780	AZA	ENSG00000070193.4	gene	-0.119561
A2780	AZA	ENSG00000070214.13	gene	-0.114786
A2780	AZA	ENSG00000070269.11	gene	-0.464533
A2780	AZA	ENSG00000070366.11	gene	-0.154095
A2780	AZA	ENSG00000070367.13	gene	0.427168
A2780	AZA	ENSG00000070371.13	gene	-0.177411
A2780	AZA	ENSG00000070404.7	gene	0.282467
A2780	AZA	ENSG00000070413.16	gene	-0.363814
A2780	AZA	ENSG00000070423.15	gene	0.286651
A2780	AZA	ENSG00000070444.12	gene	-0.794574
A2780	AZA	ENSG00000070476.12	gene	-0.423932
A2780	AZA	ENSG00000070495.12	gene	0.50592
A2780	AZA	ENSG00000070501.9	gene	0.479987
A2780	AZA	ENSG00000070540.10	gene	0.719369
A2780	AZA	ENSG00000070601.7	gene	-0.195101
A2780	AZA	ENSG00000070610.12	gene	0.155523
A2780	AZA	ENSG00000070614.12	gene	-0.439089
A2780	AZA	ENSG00000070669.14	gene	0.332542
A2780	AZA	ENSG00000070718.9	gene	-0.386836
A2780	AZA	ENSG00000070729.11	gene	2.3898
A2780	AZA	ENSG00000070731.7	gene	0.264323
A2780	AZA	ENSG00000070748.15	gene	-2.63767
A2780	AZA	ENSG00000070756.11	gene	-0.51938
A2780	AZA	ENSG00000070759.14	gene	1.48296
A2780	AZA	ENSG00000070761.5	gene	0.113235
A2780	AZA	ENSG00000070770.6	gene	-0.320171
A2780	AZA	ENSG00000070778.10	gene	1.33096
A2780	AZA	ENSG00000070785.14	gene	0.64155
A2780	AZA	ENSG00000070808.13	gene	3.61219
A2780	AZA	ENSG00000070814.15	gene	-0.147863
A2780	AZA	ENSG00000070831.13	gene	0.641592
A2780	AZA	ENSG00000070882.10	gene	0.15792
A2780	AZA	ENSG00000070886.8	gene	-0.088191
A2780	AZA	ENSG00000070915.7	gene	6.70688
A2780	AZA	ENSG00000070950.7	gene	0.0602322
A2780	AZA	ENSG00000070961.12	gene	-0.297308
A2780	AZA	ENSG00000070985.11	gene	-2.6545
A2780	AZA	ENSG00000071051.11	gene	-0.109796
A2780	AZA	ENSG00000071054.13	gene	0.22008
A2780	AZA	ENSG00000071073.10	gene	0.380748
A2780	AZA	ENSG00000071082.8	gene	-0.359277
A2780	AZA	ENSG00000071127.14	gene	0.647647
A2780	AZA	ENSG00000071189.19	gene	0.123062
A2780	AZA	ENSG00000071205.9	gene	0.351301
A2780	AZA	ENSG00000071242.9	gene	-0.967696
A2780	AZA	ENSG00000071243.13	gene	0.0309946
A2780	AZA	ENSG00000071246.8	gene	-0.378236
A2780	AZA	ENSG00000071282.9	gene	1.29031
A2780	AZA	ENSG00000071462.9	gene	0.362882
A2780	AZA	ENSG00000071537.11	gene	-0.839994
A2780	AZA	ENSG00000071539.11	gene	0.295257
A2780	AZA	ENSG00000071553.14	gene	-0.0599538
A2780	AZA	ENSG00000071564.12	gene	-0.215092
A2780	AZA	ENSG00000071575.9	gene	2.38983
A2780	AZA	ENSG00000071626.14	gene	-0.0945407
A2780	AZA	ENSG00000071655.15	gene	-0.469735
A2780	AZA	ENSG00000071794.13	gene	0.368151
A2780	AZA	ENSG00000071859.12	gene	0.183271
A2780	AZA	ENSG00000071889.14	gene	0.405279
A2780	AZA	ENSG00000071894.12	gene	-0.284489
A2780	AZA	ENSG00000071909.16	gene	0.219929
A2780	AZA	ENSG00000071967.9	gene	-0.205144
A2780	AZA	ENSG00000071991.6	gene	1.80487
A2780	AZA	ENSG00000071994.8	gene	0.26753
A2780	AZA	ENSG00000072041.14	gene	3.34093
A2780	AZA	ENSG00000072042.10	gene	0.202911
A2780	AZA	ENSG00000072062.11	gene	0.129265
A2780	AZA	ENSG00000072071.14	gene	-0.373286
A2780	AZA	ENSG00000072110.11	gene	0.353311
A2780	AZA	ENSG00000072121.13	gene	-0.0934492
A2780	AZA	ENSG00000072133.8	gene	-0.120475
A2780	AZA	ENSG00000072134.13	gene	-0.0922499
A2780	AZA	ENSG00000072135.10	gene	-0.38513
A2780	AZA	ENSG00000072163.16	gene	-1.06956
A2780	AZA	ENSG00000072182.10	gene	-1.00244
A2780	AZA	ENSG00000072195.12	gene	-0.901379
A2780	AZA	ENSG00000072201.11	gene	1.01492
A2780	AZA	ENSG00000072210.16	gene	0.177782
A2780	AZA	ENSG00000072274.10	gene	0.832866
A2780	AZA	ENSG00000072310.14	gene	-0.25841
A2780	AZA	ENSG00000072364.10	gene	0.977157
A2780	AZA	ENSG00000072401.12	gene	0.336798
A2780	AZA	ENSG00000072415.6	gene	0.457257
A2780	AZA	ENSG00000072422.14	gene	0.23069
A2780	AZA	ENSG00000072501.15	gene	0.0473929
A2780	AZA	ENSG00000072506.10	gene	0.792341
A2780	AZA	ENSG00000072518.18	gene	0.139474
A2780	AZA	ENSG00000072571.17	gene	0.523878
A2780	AZA	ENSG00000072609.15	gene	0.647786
A2780	AZA	ENSG00000072657.6	gene	-1.254
A2780	AZA	ENSG00000072682.16	gene	0.363552
A2780	AZA	ENSG00000072736.16	gene	-0.312888
A2780	AZA	ENSG00000072756.14	gene	-0.0506573
A2780	AZA	ENSG00000072778.17	gene	0.31757
A2780	AZA	ENSG00000072786.10	gene	0.425473
A2780	AZA	ENSG00000072803.15	gene	0.260338
A2780	AZA	ENSG00000072818.9	gene	1.65288
A2780	AZA	ENSG00000072832.12	gene	0.804885
A2780	AZA	ENSG00000072840.10	gene	-0.659099
A2780	AZA	ENSG00000072849.8	gene	0.0241994
A2780	AZA	ENSG00000072858.8	gene	1.80487
A2780	AZA	ENSG00000072864.10	gene	0.217163
A2780	AZA	ENSG00000072952.16	gene	2.80486
A2780	AZA	ENSG00000072954.4	gene	1.1721
A2780	AZA	ENSG00000072958.6	gene	0.167217
A2780	AZA	ENSG00000073008.12	gene	0.181487
A2780	AZA	ENSG00000073050.9	gene	-0.716209
A2780	AZA	ENSG00000073060.13	gene	0.370086
A2780	AZA	ENSG00000073111.11	gene	-0.0265339
A2780	AZA	ENSG00000073146.13	gene	-0.0849283
A2780	AZA	ENSG00000073150.11	gene	0.21993
A2780	AZA	ENSG00000073169.11	gene	-0.27877
A2780	AZA	ENSG00000073282.10	gene	2.18339
A2780	AZA	ENSG00000073331.15	gene	-1.71867
A2780	AZA	ENSG00000073350.11	gene	0.0367033
A2780	AZA	ENSG00000073417.12	gene	-0.0728309
A2780	AZA	ENSG00000073464.9	gene	2.12679
A2780	AZA	ENSG00000073536.15	gene	-0.649678
A2780	AZA	ENSG00000073578.14	gene	0.445612
A2780	AZA	ENSG00000073584.16	gene	-0.33823
A2780	AZA	ENSG00000073598.5	gene	-2.63767
A2780	AZA	ENSG00000073605.16	gene	-0.097353
A2780	AZA	ENSG00000073614.9	gene	0.166837
A2780	AZA	ENSG00000073670.11	gene	-0.130664
A2780	AZA	ENSG00000073711.8	gene	0.00157832
A2780	AZA	ENSG00000073712.11	gene	-0.236957
A2780	AZA	ENSG00000073756.9	gene	3.89232
A2780	AZA	ENSG00000073792.13	gene	-0.276552
A2780	AZA	ENSG00000073803.11	gene	0.385348
A2780	AZA	ENSG00000073849.12	gene	-0.601254
A2780	AZA	ENSG00000073861.2	gene	6.05478
A2780	AZA	ENSG00000073905.8	gene	-1.78005
A2780	AZA	ENSG00000073910.17	gene	0.453414
A2780	AZA	ENSG00000073921.15	gene	0.0220383
A2780	AZA	ENSG00000073969.16	gene	0.308306
A2780	AZA	ENSG00000074047.18	gene	-1.01008
A2780	AZA	ENSG00000074054.15	gene	-0.230308
A2780	AZA	ENSG00000074071.11	gene	-0.18784
A2780	AZA	ENSG00000074181.6	gene	-0.28854
A2780	AZA	ENSG00000074201.6	gene	-0.0575862
A2780	AZA	ENSG00000074211.11	gene	1.03116
A2780	AZA	ENSG00000074219.11	gene	-0.238481
A2780	AZA	ENSG00000074266.15	gene	0.146106
A2780	AZA	ENSG00000074276.8	gene	-1.00245
A2780	AZA	ENSG00000074317.8	gene	0.219931
A2780	AZA	ENSG00000074319.10	gene	0.288193
A2780	AZA	ENSG00000074356.14	gene	-0.0754808
A2780	AZA	ENSG00000074370.15	gene	0.664025
A2780	AZA	ENSG00000074410.11	gene	-0.215013
A2780	AZA	ENSG00000074416.11	gene	1.38983
A2780	AZA	ENSG00000074527.9	gene	5.83238
A2780	AZA	ENSG00000074582.10	gene	-0.00818169
A2780	AZA	ENSG00000074590.11	gene	1.40634
A2780	AZA	ENSG00000074603.16	gene	0.034781
A2780	AZA	ENSG00000074621.11	gene	-0.594244
A2780	AZA	ENSG00000074657.11	gene	-0.423652
A2780	AZA	ENSG00000074660.13	gene	1.86901
A2780	AZA	ENSG00000074695.5	gene	-0.117853
A2780	AZA	ENSG00000074696.10	gene	0.225073
A2780	AZA	ENSG00000074706.11	gene	-3.2226
A2780	AZA	ENSG00000074755.12	gene	0.0133749
A2780	AZA	ENSG00000074800.11	gene	0.323515
A2780	AZA	ENSG00000074803.15	gene	-3.2226
A2780	AZA	ENSG00000074842.5	gene	0.205327
A2780	AZA	ENSG00000074855.8	gene	-0.946852
A2780	AZA	ENSG00000074935.11	gene	-0.213163
A2780	AZA	ENSG00000074964.14	gene	0.244172
A2780	AZA	ENSG00000074966.8	gene	-0.277571
A2780	AZA	ENSG00000075043.15	gene	0.318009
A2780	AZA	ENSG00000075089.7	gene	1.04363
A2780	AZA	ENSG00000075131.7	gene	0.201645
A2780	AZA	ENSG00000075142.11	gene	0.546905
A2780	AZA	ENSG00000075151.17	gene	-0.179523
A2780	AZA	ENSG00000075188.6	gene	0.248924
A2780	AZA	ENSG00000075213.8	gene	-0.643871
A2780	AZA	ENSG00000075218.16	gene	0.362042
A2780	AZA	ENSG00000075223.11	gene	1.03979
A2780	AZA	ENSG00000075234.14	gene	-0.038501
A2780	AZA	ENSG00000075239.11	gene	0.18396
A2780	AZA	ENSG00000075240.14	gene	-0.266372
A2780	AZA	ENSG00000075275.14	gene	-1.37812
A2780	AZA	ENSG00000075290.7	gene	1.54184
A2780	AZA	ENSG00000075292.16	gene	0.0202916
A2780	AZA	ENSG00000075303.10	gene	0.182327
A2780	AZA	ENSG00000075336.9	gene	0.0762728
A2780	AZA	ENSG00000075340.20	gene	-0.871817
A2780	AZA	ENSG00000075388.3	gene	4.24731
A2780	AZA	ENSG00000075391.14	gene	-0.191825
A2780	AZA	ENSG00000075399.10	gene	-0.221583
A2780	AZA	ENSG00000075407.15	gene	-0.270085
A2780	AZA	ENSG00000075413.15	gene	0.290812
A2780	AZA	ENSG00000075415.10	gene	0.0960786
A2780	AZA	ENSG00000075420.10	gene	0.112085
A2780	AZA	ENSG00000075426.9	gene	1.0242
A2780	AZA	ENSG00000075539.11	gene	0.384614
A2780	AZA	ENSG00000075568.14	gene	0.106531
A2780	AZA	ENSG00000075618.15	gene	0.852803
A2780	AZA	ENSG00000075624.11	gene	0.626065
A2780	AZA	ENSG00000075643.5	gene	1.07258
A2780	AZA	ENSG00000075651.13	gene	1.37425
A2780	AZA	ENSG00000075673.9	gene	1.38983
A2780	AZA	ENSG00000075702.14	gene	-0.258307
A2780	AZA	ENSG00000075711.18	gene	-0.225695
A2780	AZA	ENSG00000075785.10	gene	-0.0911975
A2780	AZA	ENSG00000075790.8	gene	0.510408
A2780	AZA	ENSG00000075826.14	gene	-1.4286
A2780	AZA	ENSG00000075856.9	gene	0.0738822
A2780	AZA	ENSG00000075884.10	gene	0.804875
A2780	AZA	ENSG00000075886.10	gene	9.07998
A2780	AZA	ENSG00000075891.19	gene	-1.84905
A2780	AZA	ENSG00000075914.10	gene	-0.03941
A2780	AZA	ENSG00000075945.10	gene	-0.401031
A2780	AZA	ENSG00000075975.13	gene	-0.081135
A2780	AZA	ENSG00000076003.4	gene	-0.189202
A2780	AZA	ENSG00000076043.7	gene	0.639127
A2780	AZA	ENSG00000076053.8	gene	0.223339
A2780	AZA	ENSG00000076067.9	gene	-0.157377
A2780	AZA	ENSG00000076108.9	gene	-0.0522582
A2780	AZA	ENSG00000076201.12	gene	-0.635379
A2780	AZA	ENSG00000076242.12	gene	6.91336
A2780	AZA	ENSG00000076248.8	gene	0.318034
A2780	AZA	ENSG00000076258.7	gene	-0.315404
A2780	AZA	ENSG00000076321.8	gene	0.0204546
A2780	AZA	ENSG00000076344.13	gene	0.804875
A2780	AZA	ENSG00000076351.10	gene	-0.338071
A2780	AZA	ENSG00000076382.14	gene	0.220909
A2780	AZA	ENSG00000076513.14	gene	-0.159649
A2780	AZA	ENSG00000076554.13	gene	0.214576
A2780	AZA	ENSG00000076555.13	gene	-0.340492
A2780	AZA	ENSG00000076604.12	gene	0.578207
A2780	AZA	ENSG00000076641.4	gene	0.541853
A2780	AZA	ENSG00000076650.4	gene	-0.0431103
A2780	AZA	ENSG00000076662.7	gene	1.02728
A2780	AZA	ENSG00000076685.16	gene	0.582261
A2780	AZA	ENSG00000076706.12	gene	2.969
A2780	AZA	ENSG00000076716.8	gene	-0.486878
A2780	AZA	ENSG00000076770.12	gene	0.838517
A2780	AZA	ENSG00000076826.7	gene	-0.548743
A2780	AZA	ENSG00000076864.17	gene	-0.578438
A2780	AZA	ENSG00000076924.9	gene	0.311149
A2780	AZA	ENSG00000076928.15	gene	0.561844
A2780	AZA	ENSG00000076944.12	gene	0.384556
A2780	AZA	ENSG00000076984.15	gene	-0.362223
A2780	AZA	ENSG00000077044.7	gene	-0.198553
A2780	AZA	ENSG00000077063.8	gene	0.0458992
A2780	AZA	ENSG00000077092.16	gene	1.38983
A2780	AZA	ENSG00000077097.11	gene	0.266974
A2780	AZA	ENSG00000077147.12	gene	0.279208
A2780	AZA	ENSG00000077150.15	gene	1.15992
A2780	AZA	ENSG00000077152.7	gene	0.40857
A2780	AZA	ENSG00000077157.18	gene	-0.0229591
A2780	AZA	ENSG00000077232.14	gene	0.1085
A2780	AZA	ENSG00000077235.15	gene	0.106194
A2780	AZA	ENSG00000077238.11	gene	0.691993
A2780	AZA	ENSG00000077254.12	gene	0.224332
A2780	AZA	ENSG00000077264.12	gene	2.48295
A2780	AZA	ENSG00000077274.8	gene	2.02727
A2780	AZA	ENSG00000077312.6	gene	0.430277
A2780	AZA	ENSG00000077327.13	gene	2.38984
A2780	AZA	ENSG00000077348.6	gene	-0.180898
A2780	AZA	ENSG00000077380.13	gene	-0.467674
A2780	AZA	ENSG00000077454.13	gene	-0.216806
A2780	AZA	ENSG00000077458.10	gene	0.0460377
A2780	AZA	ENSG00000077463.12	gene	0.234573
A2780	AZA	ENSG00000077498.8	gene	4.24731
A2780	AZA	ENSG00000077514.6	gene	0.21517
A2780	AZA	ENSG00000077522.10	gene	-0.576361
A2780	AZA	ENSG00000077549.15	gene	0.415644
A2780	AZA	ENSG00000077585.11	gene	0.397978
A2780	AZA	ENSG00000077616.8	gene	-0.149327
A2780	AZA	ENSG00000077684.13	gene	0.297955
A2780	AZA	ENSG00000077713.16	gene	-0.124437
A2780	AZA	ENSG00000077721.13	gene	0.18001
A2780	AZA	ENSG00000077782.17	gene	-0.901274
A2780	AZA	ENSG00000077800.9	gene	1.80483
A2780	AZA	ENSG00000077935.14	gene	5.26427
A2780	AZA	ENSG00000077942.15	gene	-0.583976
A2780	AZA	ENSG00000077943.7	gene	-1.69761
A2780	AZA	ENSG00000078018.17	gene	0.151105
A2780	AZA	ENSG00000078043.13	gene	-0.232253
A2780	AZA	ENSG00000078053.14	gene	0.389853
A2780	AZA	ENSG00000078061.10	gene	0.0884336
A2780	AZA	ENSG00000078070.9	gene	-0.0172656
A2780	AZA	ENSG00000078081.5	gene	-1.78007
A2780	AZA	ENSG00000078098.11	gene	1.38983
A2780	AZA	ENSG00000078114.16	gene	-0.0966197
A2780	AZA	ENSG00000078124.9	gene	-0.123344
A2780	AZA	ENSG00000078140.11	gene	0.0489129
A2780	AZA	ENSG00000078142.9	gene	-0.208998
A2780	AZA	ENSG00000078177.11	gene	-0.167672
A2780	AZA	ENSG00000078237.5	gene	0.99097
A2780	AZA	ENSG00000078246.13	gene	0.650631
A2780	AZA	ENSG00000078269.11	gene	1.46385
A2780	AZA	ENSG00000078304.17	gene	0.309599
A2780	AZA	ENSG00000078319.8	gene	0.193929
A2780	AZA	ENSG00000078328.17	gene	-1.36501
A2780	AZA	ENSG00000078369.15	gene	-0.156639
A2780	AZA	ENSG00000078403.14	gene	-0.20915
A2780	AZA	ENSG00000078487.15	gene	-0.848246
A2780	AZA	ENSG00000078549.12	gene	1.80483
A2780	AZA	ENSG00000078579.8	gene	-0.19285
A2780	AZA	ENSG00000078596.8	gene	0.26786
A2780	AZA	ENSG00000078618.17	gene	0.278577
A2780	AZA	ENSG00000078668.11	gene	0.555273
A2780	AZA	ENSG00000078674.15	gene	-0.193945
A2780	AZA	ENSG00000078687.14	gene	-1.03175
A2780	AZA	ENSG00000078699.19	gene	-0.236314
A2780	AZA	ENSG00000078747.10	gene	0.274731
A2780	AZA	ENSG00000078795.14	gene	2.67934
A2780	AZA	ENSG00000078804.10	gene	0.493685
A2780	AZA	ENSG00000078808.14	gene	-0.0628352
A2780	AZA	ENSG00000078814.13	gene	-1.39673
A2780	AZA	ENSG00000078900.12	gene	-2.07775
A2780	AZA	ENSG00000078902.13	gene	-0.254007
A2780	AZA	ENSG00000078967.10	gene	0.163118
A2780	AZA	ENSG00000079101.14	gene	1.12681
A2780	AZA	ENSG00000079102.14	gene	2.3898
A2780	AZA	ENSG00000079112.7	gene	0.804875
A2780	AZA	ENSG00000079134.9	gene	0.0350755
A2780	AZA	ENSG00000079150.15	gene	-1.08264
A2780	AZA	ENSG00000079156.14	gene	-0.202044
A2780	AZA	ENSG00000079215.11	gene	0.202002
A2780	AZA	ENSG00000079246.13	gene	0.113158
A2780	AZA	ENSG00000079257.5	gene	0.987751
A2780	AZA	ENSG00000079263.16	gene	0.274377
A2780	AZA	ENSG00000079277.17	gene	0.910778
A2780	AZA	ENSG00000079308.14	gene	-0.365034
A2780	AZA	ENSG00000079313.9	gene	-0.149309
A2780	AZA	ENSG00000079332.12	gene	0.312988
A2780	AZA	ENSG00000079335.15	gene	0.369839
A2780	AZA	ENSG00000079337.13	gene	1.86902
A2780	AZA	ENSG00000079385.19	gene	2.66838
A2780	AZA	ENSG00000079387.11	gene	-0.0132389
A2780	AZA	ENSG00000079432.5	gene	-0.412778
A2780	AZA	ENSG00000079435.7	gene	1.27696
A2780	AZA	ENSG00000079459.10	gene	0.0221988
A2780	AZA	ENSG00000079462.5	gene	-0.162492
A2780	AZA	ENSG00000079482.12	gene	-0.0503782
A2780	AZA	ENSG00000079616.10	gene	-0.150491
A2780	AZA	ENSG00000079691.16	gene	0.787239
A2780	AZA	ENSG00000079739.13	gene	-0.548969
A2780	AZA	ENSG00000079785.12	gene	0.161075
A2780	AZA	ENSG00000079805.14	gene	0.0453258
A2780	AZA	ENSG00000079819.14	gene	0.206985
A2780	AZA	ENSG00000079841.16	gene	2.16745
A2780	AZA	ENSG00000079931.12	gene	0.357432
A2780	AZA	ENSG00000079950.11	gene	-0.0157899
A2780	AZA	ENSG00000079974.15	gene	-0.31059
A2780	AZA	ENSG00000079999.11	gene	-0.046329
A2780	AZA	ENSG00000080007.7	gene	7.80472
A2780	AZA	ENSG00000080031.7	gene	0.256266
A2780	AZA	ENSG00000080166.13	gene	-0.00245953
A2780	AZA	ENSG00000080189.12	gene	-0.291975
A2780	AZA	ENSG00000080200.7	gene	0.209888
A2780	AZA	ENSG00000080224.15	gene	-0.239506
A2780	AZA	ENSG00000080293.7	gene	-2.63767
A2780	AZA	ENSG00000080298.13	gene	-0.314998
A2780	AZA	ENSG00000080345.15	gene	0.117062
A2780	AZA	ENSG00000080371.5	gene	0.273923
A2780	AZA	ENSG00000080493.11	gene	0.804889
A2780	AZA	ENSG00000080503.17	gene	1.65288
A2780	AZA	ENSG00000080546.11	gene	0.853467
A2780	AZA	ENSG00000080561.11	gene	0.250298
A2780	AZA	ENSG00000080573.6	gene	4.24731
A2780	AZA	ENSG00000080603.14	gene	-0.423706
A2780	AZA	ENSG00000080608.9	gene	0.379299
A2780	AZA	ENSG00000080644.13	gene	-0.394421
A2780	AZA	ENSG00000080709.12	gene	0.603255
A2780	AZA	ENSG00000080802.16	gene	-0.0656464
A2780	AZA	ENSG00000080815.16	gene	0.450222
A2780	AZA	ENSG00000080819.4	gene	0.145005
A2780	AZA	ENSG00000080822.14	gene	0.00774524
A2780	AZA	ENSG00000080823.19	gene	0.480407
A2780	AZA	ENSG00000080824.16	gene	1.06135
A2780	AZA	ENSG00000080839.9	gene	-0.201921
A2780	AZA	ENSG00000080845.15	gene	-0.428704
A2780	AZA	ENSG00000080854.12	gene	0.974812
A2780	AZA	ENSG00000080947.12	gene	-0.664841
A2780	AZA	ENSG00000080986.10	gene	0.384796
A2780	AZA	ENSG00000081014.8	gene	0.631595
A2780	AZA	ENSG00000081019.11	gene	-0.225371
A2780	AZA	ENSG00000081026.16	gene	-0.177411
A2780	AZA	ENSG00000081052.11	gene	-2.63767
A2780	AZA	ENSG00000081059.17	gene	0.016392
A2780	AZA	ENSG00000081087.12	gene	0.615616
A2780	AZA	ENSG00000081138.11	gene	0.804885
A2780	AZA	ENSG00000081148.11	gene	-1.26222
A2780	AZA	ENSG00000081154.9	gene	0.0980407
A2780	AZA	ENSG00000081177.16	gene	-0.134992
A2780	AZA	ENSG00000081181.5	gene	-0.558925
A2780	AZA	ENSG00000081189.11	gene	-1.94779
A2780	AZA	ENSG00000081237.16	gene	4.24731
A2780	AZA	ENSG00000081248.8	gene	1.80483
A2780	AZA	ENSG00000081307.10	gene	0.225729
A2780	AZA	ENSG00000081320.8	gene	0.185062
A2780	AZA	ENSG00000081377.14	gene	0.332905
A2780	AZA	ENSG00000081386.10	gene	-0.0995358
A2780	AZA	ENSG00000081479.10	gene	1.15852
A2780	AZA	ENSG00000081665.11	gene	1.26432
A2780	AZA	ENSG00000081692.10	gene	0.480823
A2780	AZA	ENSG00000081721.9	gene	-0.244095
A2780	AZA	ENSG00000081760.14	gene	0.480213
A2780	AZA	ENSG00000081791.6	gene	-0.238299
A2780	AZA	ENSG00000081803.13	gene	0.38985
A2780	AZA	ENSG00000081818.3	gene	-1.16709
A2780	AZA	ENSG00000081842.15	gene	1.08052
A2780	AZA	ENSG00000081853.14	gene	3.32844
A2780	AZA	ENSG00000081870.9	gene	0.830882
A2780	AZA	ENSG00000081913.11	gene	-0.432977
A2780	AZA	ENSG00000081923.8	gene	1.41257
A2780	AZA	ENSG00000081985.8	gene	2.3898
A2780	AZA	ENSG00000082014.14	gene	-0.717242
A2780	AZA	ENSG00000082068.6	gene	0.383336
A2780	AZA	ENSG00000082126.15	gene	1.05864
A2780	AZA	ENSG00000082146.10	gene	-0.320925
A2780	AZA	ENSG00000082153.15	gene	0.62886
A2780	AZA	ENSG00000082196.18	gene	-0.53534
A2780	AZA	ENSG00000082212.9	gene	0.149178
A2780	AZA	ENSG00000082213.15	gene	0.259788
A2780	AZA	ENSG00000082258.10	gene	-0.0847739
A2780	AZA	ENSG00000082269.14	gene	-0.0910969
A2780	AZA	ENSG00000082293.10	gene	1.38983
A2780	AZA	ENSG00000082397.13	gene	0.0780098
A2780	AZA	ENSG00000082438.13	gene	-1.46843
A2780	AZA	ENSG00000082458.9	gene	-0.383748
A2780	AZA	ENSG00000082482.11	gene	0.389853
A2780	AZA	ENSG00000082497.9	gene	-1.1951
A2780	AZA	ENSG00000082512.12	gene	-0.126745
A2780	AZA	ENSG00000082515.14	gene	0.00434235
A2780	AZA	ENSG00000082516.8	gene	0.00611543
A2780	AZA	ENSG00000082641.13	gene	-0.0186607
A2780	AZA	ENSG00000082684.12	gene	-3.63763
A2780	AZA	ENSG00000082701.12	gene	-0.179081
A2780	AZA	ENSG00000082781.9	gene	0.142606
A2780	AZA	ENSG00000082805.17	gene	-0.0799364
A2780	AZA	ENSG00000082898.14	gene	-0.0424379
A2780	AZA	ENSG00000082996.17	gene	-0.0518806
A2780	AZA	ENSG00000083067.20	gene	-0.758466
A2780	AZA	ENSG00000083093.7	gene	-0.0274354
A2780	AZA	ENSG00000083097.12	gene	0.294868
A2780	AZA	ENSG00000083099.8	gene	-0.0912777
A2780	AZA	ENSG00000083123.12	gene	-0.760244
A2780	AZA	ENSG00000083168.7	gene	-0.247249
A2780	AZA	ENSG00000083223.15	gene	0.288957
A2780	AZA	ENSG00000083290.17	gene	-0.713963
A2780	AZA	ENSG00000083312.15	gene	0.12547
A2780	AZA	ENSG00000083444.14	gene	-0.617346
A2780	AZA	ENSG00000083454.19	gene	1.31946
A2780	AZA	ENSG00000083457.9	gene	-0.1046
A2780	AZA	ENSG00000083520.12	gene	0.249759
A2780	AZA	ENSG00000083535.13	gene	0.0725572
A2780	AZA	ENSG00000083544.11	gene	0.023139
A2780	AZA	ENSG00000083635.7	gene	0.256937
A2780	AZA	ENSG00000083642.16	gene	-0.0203995
A2780	AZA	ENSG00000083720.10	gene	-0.01579
A2780	AZA	ENSG00000083750.10	gene	-0.505349
A2780	AZA	ENSG00000083799.15	gene	1.1575
A2780	AZA	ENSG00000083807.7	gene	-0.406616
A2780	AZA	ENSG00000083812.9	gene	-0.247793
A2780	AZA	ENSG00000083814.10	gene	4.77449
A2780	AZA	ENSG00000083817.8	gene	-0.361623
A2780	AZA	ENSG00000083828.13	gene	-0.0627149
A2780	AZA	ENSG00000083838.13	gene	-0.543722
A2780	AZA	ENSG00000083844.8	gene	-0.229383
A2780	AZA	ENSG00000083845.6	gene	-0.156214
A2780	AZA	ENSG00000083857.11	gene	0.00412204
A2780	AZA	ENSG00000083896.10	gene	0.140336
A2780	AZA	ENSG00000083937.6	gene	-0.0188973
A2780	AZA	ENSG00000084070.9	gene	0.725198
A2780	AZA	ENSG00000084072.14	gene	-0.207126
A2780	AZA	ENSG00000084073.6	gene	0.319108
A2780	AZA	ENSG00000084090.11	gene	0.382213
A2780	AZA	ENSG00000084092.6	gene	-0.418993
A2780	AZA	ENSG00000084093.13	gene	-0.128709
A2780	AZA	ENSG00000084110.8	gene	-1.0431
A2780	AZA	ENSG00000084112.12	gene	0.0897952
A2780	AZA	ENSG00000084207.13	gene	1.23102
A2780	AZA	ENSG00000084234.14	gene	0.346286
A2780	AZA	ENSG00000084444.11	gene	-0.290903
A2780	AZA	ENSG00000084453.14	gene	2.1268
A2780	AZA	ENSG00000084463.5	gene	-0.0568343
A2780	AZA	ENSG00000084623.9	gene	0.558029
A2780	AZA	ENSG00000084628.7	gene	-0.417499
A2780	AZA	ENSG00000084636.15	gene	3.86376
A2780	AZA	ENSG00000084652.13	gene	0.156268
A2780	AZA	ENSG00000084676.13	gene	-0.211814
A2780	AZA	ENSG00000084693.13	gene	0.0318516
A2780	AZA	ENSG00000084710.11	gene	-0.253836
A2780	AZA	ENSG00000084731.11	gene	0.310778
A2780	AZA	ENSG00000084733.8	gene	0.0689838
A2780	AZA	ENSG00000084754.8	gene	0.143857
A2780	AZA	ENSG00000084764.8	gene	-0.047013
A2780	AZA	ENSG00000084774.11	gene	-0.802671
A2780	AZA	ENSG00000085063.12	gene	0.845949
A2780	AZA	ENSG00000085117.9	gene	0.804888
A2780	AZA	ENSG00000085185.13	gene	-0.52741
A2780	AZA	ENSG00000085224.18	gene	0.0750479
A2780	AZA	ENSG00000085231.11	gene	0.406592
A2780	AZA	ENSG00000085274.13	gene	0.170306
A2780	AZA	ENSG00000085276.15	gene	1.80489
A2780	AZA	ENSG00000085365.15	gene	-0.085658
A2780	AZA	ENSG00000085377.11	gene	-0.256437
A2780	AZA	ENSG00000085382.9	gene	-0.957291
A2780	AZA	ENSG00000085415.13	gene	0.336326
A2780	AZA	ENSG00000085433.13	gene	0.975557
A2780	AZA	ENSG00000085449.12	gene	0.0497291
A2780	AZA	ENSG00000085465.12	gene	-0.472645
A2780	AZA	ENSG00000085491.13	gene	0.59322
A2780	AZA	ENSG00000085511.17	gene	-0.0290247
A2780	AZA	ENSG00000085514.13	gene	-0.278528
A2780	AZA	ENSG00000085552.14	gene	-1.10199
A2780	AZA	ENSG00000085563.12	gene	5.24739
A2780	AZA	ENSG00000085644.11	gene	-1.06958
A2780	AZA	ENSG00000085662.11	gene	0.00612074
A2780	AZA	ENSG00000085719.9	gene	-0.00955803
A2780	AZA	ENSG00000085721.10	gene	0.10647
A2780	AZA	ENSG00000085733.13	gene	0.063756
A2780	AZA	ENSG00000085741.10	gene	-1.00246
A2780	AZA	ENSG00000085760.12	gene	0.407551
A2780	AZA	ENSG00000085788.11	gene	0.0526392
A2780	AZA	ENSG00000085831.13	gene	0.279796
A2780	AZA	ENSG00000085832.14	gene	-0.430261
A2780	AZA	ENSG00000085840.10	gene	0.218369
A2780	AZA	ENSG00000085871.6	gene	0.40896
A2780	AZA	ENSG00000085872.12	gene	-0.475221
A2780	AZA	ENSG00000085978.19	gene	0.212949
A2780	AZA	ENSG00000085982.11	gene	-0.456955
A2780	AZA	ENSG00000085998.11	gene	0.0787203
A2780	AZA	ENSG00000085999.9	gene	-0.181038
A2780	AZA	ENSG00000086015.18	gene	0.162465
A2780	AZA	ENSG00000086061.13	gene	0.850175
A2780	AZA	ENSG00000086062.10	gene	0.00220792
A2780	AZA	ENSG00000086065.11	gene	0.551039
A2780	AZA	ENSG00000086102.16	gene	-0.100326
A2780	AZA	ENSG00000086159.10	gene	-0.780046
A2780	AZA	ENSG00000086189.7	gene	0.596041
A2780	AZA	ENSG00000086200.14	gene	0.0985649
A2780	AZA	ENSG00000086205.14	gene	0.234573
A2780	AZA	ENSG00000086232.10	gene	-0.403983
A2780	AZA	ENSG00000086289.9	gene	0.549631
A2780	AZA	ENSG00000086300.13	gene	0.918469
A2780	AZA	ENSG00000086475.12	gene	-0.176966
A2780	AZA	ENSG00000086504.13	gene	0.695608
A2780	AZA	ENSG00000086506.2	gene	0.126822
A2780	AZA	ENSG00000086544.2	gene	0.00233284
A2780	AZA	ENSG00000086570.10	gene	0.804885
A2780	AZA	ENSG00000086589.9	gene	-0.112803
A2780	AZA	ENSG00000086598.8	gene	0.167425
A2780	AZA	ENSG00000086619.11	gene	0.701793
A2780	AZA	ENSG00000086666.16	gene	0.388231
A2780	AZA	ENSG00000086712.10	gene	0.293796
A2780	AZA	ENSG00000086717.16	gene	-1.3326
A2780	AZA	ENSG00000086730.14	gene	0.126822
A2780	AZA	ENSG00000086758.13	gene	-0.178499
A2780	AZA	ENSG00000086827.6	gene	0.106238
A2780	AZA	ENSG00000086848.12	gene	-0.400487
A2780	AZA	ENSG00000086967.9	gene	1.21992
A2780	AZA	ENSG00000086991.10	gene	-0.43918
A2780	AZA	ENSG00000087008.13	gene	0.463271
A2780	AZA	ENSG00000087053.16	gene	0.193452
A2780	AZA	ENSG00000087074.7	gene	0.298268
A2780	AZA	ENSG00000087076.6	gene	-1.08222
A2780	AZA	ENSG00000087077.9	gene	0.0137153
A2780	AZA	ENSG00000087085.11	gene	0.570424
A2780	AZA	ENSG00000087086.11	gene	0.720831
A2780	AZA	ENSG00000087087.16	gene	-0.0769966
A2780	AZA	ENSG00000087088.17	gene	0.589762
A2780	AZA	ENSG00000087095.10	gene	0.200401
A2780	AZA	ENSG00000087111.18	gene	0.412569
A2780	AZA	ENSG00000087116.11	gene	0.556962
A2780	AZA	ENSG00000087152.13	gene	-0.0552906
A2780	AZA	ENSG00000087157.16	gene	-0.0551371
A2780	AZA	ENSG00000087191.10	gene	-0.00791064
A2780	AZA	ENSG00000087206.14	gene	0.12107
A2780	AZA	ENSG00000087237.8	gene	3.12676
A2780	AZA	ENSG00000087245.10	gene	2.3898
A2780	AZA	ENSG00000087253.9	gene	2.12679
A2780	AZA	ENSG00000087258.11	gene	4.83232
A2780	AZA	ENSG00000087263.14	gene	-0.12414
A2780	AZA	ENSG00000087266.13	gene	-0.501973
A2780	AZA	ENSG00000087269.13	gene	0.0894093
A2780	AZA	ENSG00000087274.14	gene	0.334361
A2780	AZA	ENSG00000087299.9	gene	0.0352864
A2780	AZA	ENSG00000087301.6	gene	-0.617463
A2780	AZA	ENSG00000087302.6	gene	-0.0383513
A2780	AZA	ENSG00000087303.14	gene	-1.08465
A2780	AZA	ENSG00000087338.4	gene	0.358761
A2780	AZA	ENSG00000087365.12	gene	0.223074
A2780	AZA	ENSG00000087448.7	gene	-0.415267
A2780	AZA	ENSG00000087460.21	gene	-0.458305
A2780	AZA	ENSG00000087470.15	gene	0.143266
A2780	AZA	ENSG00000087495.14	gene	-2.63767
A2780	AZA	ENSG00000087502.15	gene	-0.0538451
A2780	AZA	ENSG00000087510.6	gene	5.24739
A2780	AZA	ENSG00000087586.15	gene	0.728121
A2780	AZA	ENSG00000087589.14	gene	2.02727
A2780	AZA	ENSG00000087842.8	gene	0.94812
A2780	AZA	ENSG00000087884.12	gene	0.121745
A2780	AZA	ENSG00000087903.10	gene	-0.802373
A2780	AZA	ENSG00000087995.13	gene	-0.0032958
A2780	AZA	ENSG00000088002.9	gene	0.804875
A2780	AZA	ENSG00000088035.13	gene	-0.274471
A2780	AZA	ENSG00000088038.15	gene	-0.318535
A2780	AZA	ENSG00000088053.9	gene	-0.780046
A2780	AZA	ENSG00000088179.6	gene	0.0791699
A2780	AZA	ENSG00000088205.10	gene	0.292321
A2780	AZA	ENSG00000088247.13	gene	-0.489535
A2780	AZA	ENSG00000088256.6	gene	-0.032656
A2780	AZA	ENSG00000088280.16	gene	0.168596
A2780	AZA	ENSG00000088298.10	gene	0.714689
A2780	AZA	ENSG00000088305.16	gene	0.879006
A2780	AZA	ENSG00000088320.3	gene	1.80483
A2780	AZA	ENSG00000088325.13	gene	0.390654
A2780	AZA	ENSG00000088340.13	gene	-0.716122
A2780	AZA	ENSG00000088356.5	gene	0.582495
A2780	AZA	ENSG00000088367.18	gene	0.358752
A2780	AZA	ENSG00000088386.13	gene	0.804875
A2780	AZA	ENSG00000088387.15	gene	-0.054936
A2780	AZA	ENSG00000088448.12	gene	-0.22277
A2780	AZA	ENSG00000088451.8	gene	0.609461
A2780	AZA	ENSG00000088538.12	gene	-0.389534
A2780	AZA	ENSG00000088543.12	gene	0.533083
A2780	AZA	ENSG00000088682.11	gene	0.0475722
A2780	AZA	ENSG00000088726.13	gene	4.24731
A2780	AZA	ENSG00000088727.10	gene	1.25555
A2780	AZA	ENSG00000088756.10	gene	-0.725701
A2780	AZA	ENSG00000088766.9	gene	0.286756
A2780	AZA	ENSG00000088808.14	gene	0.0574668
A2780	AZA	ENSG00000088812.15	gene	-0.146758
A2780	AZA	ENSG00000088826.15	gene	0.377466
A2780	AZA	ENSG00000088832.12	gene	-0.240556
A2780	AZA	ENSG00000088833.15	gene	0.257399
A2780	AZA	ENSG00000088836.10	gene	0.375495
A2780	AZA	ENSG00000088854.12	gene	0.356573
A2780	AZA	ENSG00000088876.9	gene	-0.0894274
A2780	AZA	ENSG00000088881.18	gene	-1.72118
A2780	AZA	ENSG00000088882.7	gene	4.24731
A2780	AZA	ENSG00000088888.15	gene	-0.389689
A2780	AZA	ENSG00000088899.12	gene	-0.227534
A2780	AZA	ENSG00000088926.11	gene	1.38983
A2780	AZA	ENSG00000088930.7	gene	0.00790802
A2780	AZA	ENSG00000088970.13	gene	0.424703
A2780	AZA	ENSG00000088986.8	gene	0.159531
A2780	AZA	ENSG00000088992.15	gene	0.515384
A2780	AZA	ENSG00000089006.14	gene	0.162154
A2780	AZA	ENSG00000089009.13	gene	-0.274827
A2780	AZA	ENSG00000089022.11	gene	-0.424024
A2780	AZA	ENSG00000089041.14	gene	1.54184
A2780	AZA	ENSG00000089048.12	gene	0.117176
A2780	AZA	ENSG00000089050.12	gene	-0.105038
A2780	AZA	ENSG00000089053.10	gene	-0.26909
A2780	AZA	ENSG00000089057.12	gene	-0.114675
A2780	AZA	ENSG00000089060.9	gene	0.952986
A2780	AZA	ENSG00000089063.12	gene	0.0949337
A2780	AZA	ENSG00000089091.14	gene	-0.56648
A2780	AZA	ENSG00000089094.14	gene	-0.417936
A2780	AZA	ENSG00000089101.15	gene	1.80487
A2780	AZA	ENSG00000089123.13	gene	-0.139115
A2780	AZA	ENSG00000089127.10	gene	1.50532
A2780	AZA	ENSG00000089154.8	gene	0.121136
A2780	AZA	ENSG00000089157.13	gene	-0.186628
A2780	AZA	ENSG00000089159.13	gene	1.26432
A2780	AZA	ENSG00000089163.4	gene	1.38985
A2780	AZA	ENSG00000089177.15	gene	0.0568156
A2780	AZA	ENSG00000089195.12	gene	0.425815
A2780	AZA	ENSG00000089199.7	gene	-0.417499
A2780	AZA	ENSG00000089220.4	gene	-0.0311689
A2780	AZA	ENSG00000089234.13	gene	0.308967
A2780	AZA	ENSG00000089248.6	gene	-0.484792
A2780	AZA	ENSG00000089280.16	gene	-0.704473
A2780	AZA	ENSG00000089289.13	gene	-0.157741
A2780	AZA	ENSG00000089327.12	gene	-0.279382
A2780	AZA	ENSG00000089335.18	gene	-0.497261
A2780	AZA	ENSG00000089351.12	gene	-0.41499
A2780	AZA	ENSG00000089472.14	gene	0.0679296
A2780	AZA	ENSG00000089486.14	gene	0.0829887
A2780	AZA	ENSG00000089505.15	gene	-1.86753
A2780	AZA	ENSG00000089597.14	gene	-0.265789
A2780	AZA	ENSG00000089639.8	gene	0.823266
A2780	AZA	ENSG00000089682.14	gene	0.174632
[truncated: 383,076+ more rows]

## Sheet: Table S5 - OVCA TEtrx Counts
Table S5 - OVCA Treatment vs Mock Count of Cell Lines - TEtranscripts Upregulated Loci
family	class	treatment	count
(TCTATC)n	Simple_repeat	AZA	4
(TTCATA)n	Simple_repeat	AZA	4
UCON85	Unknown	AZA	4
(GAATG)n	Simple_repeat	AZA/ITF	4
(TCCCCT)n	Simple_repeat	AZA/ITF	4
(TCTATC)n	Simple_repeat	AZA/ITF	4
GSAT	Satellite	AZA/ITF	4
HERV9-int	LTR	AZA/ITF	4
UCON85	Unknown	AZA/ITF	4
(CCTCTG)n	Simple_repeat	ITF	4
(AATTC)n	Simple_repeat	AZA	3
(AGAAC)n	Simple_repeat	AZA	3
(AGAACA)n	Simple_repeat	AZA	3
(AGCTTC)n	Simple_repeat	AZA	3
(ATCAA)n	Simple_repeat	AZA	3
(ATCTC)n	Simple_repeat	AZA	3
(ATTTCT)n	Simple_repeat	AZA	3
(CAACAT)n	Simple_repeat	AZA	3
(CATAT)n	Simple_repeat	AZA	3
(CCGCC)n	Simple_repeat	AZA	3
(CTATA)n	Simple_repeat	AZA	3
(CTCCCTC)n	Simple_repeat	AZA	3
(CTGCG)n	Simple_repeat	AZA	3
(CTTCTT)n	Simple_repeat	AZA	3
(GAATG)n	Simple_repeat	AZA	3
(TAACTTA)n	Simple_repeat	AZA	3
(TAAGA)n	Simple_repeat	AZA	3
(TAATAGT)n	Simple_repeat	AZA	3
(TAGAAT)n	Simple_repeat	AZA	3
(TATTGT)n	Simple_repeat	AZA	3
(TCCCGG)n	Simple_repeat	AZA	3
(TGTTTTA)n	Simple_repeat	AZA	3
(TTTAAG)n	Simple_repeat	AZA	3
HERVK11D-int	LTR	AZA	3
L1P4c	LINE	AZA	3
LTR1B1	LTR	AZA	3
U1	snRNA	AZA	3
UCON15	Unknown	AZA	3
(AAAATA)n	Simple_repeat	AZA/ITF	3
(AACAAA)n	Simple_repeat	AZA/ITF	3
(ACACAA)n	Simple_repeat	AZA/ITF	3
(ACTG)n	Simple_repeat	AZA/ITF	3
(AGAACA)n	Simple_repeat	AZA/ITF	3
(AGAAGC)n	Simple_repeat	AZA/ITF	3
(AGCC)n	Simple_repeat	AZA/ITF	3
(AGGTG)n	Simple_repeat	AZA/ITF	3
(ATCCTC)n	Simple_repeat	AZA/ITF	3
(ATCTC)n	Simple_repeat	AZA/ITF	3
(CACACT)n	Simple_repeat	AZA/ITF	3
(CACAGC)n	Simple_repeat	AZA/ITF	3
(CAGAGGT)n	Simple_repeat	AZA/ITF	3
(CAGGA)n	Simple_repeat	AZA/ITF	3
(CATCTT)n	Simple_repeat	AZA/ITF	3
(CCATCC)n	Simple_repeat	AZA/ITF	3
(CCCCGG)n	Simple_repeat	AZA/ITF	3
(CCCGGCG)n	Simple_repeat	AZA/ITF	3
(CCCTTT)n	Simple_repeat	AZA/ITF	3
(CCGAC)n	Simple_repeat	AZA/ITF	3
(CCGCC)n	Simple_repeat	AZA/ITF	3
(CCGCCG)n	Simple_repeat	AZA/ITF	3
(CCGCCT)n	Simple_repeat	AZA/ITF	3
(CCTGCCC)n	Simple_repeat	AZA/ITF	3
(CCTGCTC)n	Simple_repeat	AZA/ITF	3
(CGA)n	Simple_repeat	AZA/ITF	3
(CGCA)n	Simple_repeat	AZA/ITF	3
(CGCCCT)n	Simple_repeat	AZA/ITF	3
(CGCCGC)n	Simple_repeat	AZA/ITF	3
(CTACTG)n	Simple_repeat	AZA/ITF	3
(CTCTCCC)n	Simple_repeat	AZA/ITF	3
(CTTGCT)n	Simple_repeat	AZA/ITF	3
(GAGAGCT)n	Simple_repeat	AZA/ITF	3
(GAGCCC)n	Simple_repeat	AZA/ITF	3
(GAGGATG)n	Simple_repeat	AZA/ITF	3
(GAGGCCA)n	Simple_repeat	AZA/ITF	3
(GCCTCA)n	Simple_repeat	AZA/ITF	3
(GCGAG)n	Simple_repeat	AZA/ITF	3
(GCGCGG)n	Simple_repeat	AZA/ITF	3
(GCGGCG)n	Simple_repeat	AZA/ITF	3
(GCTCCT)n	Simple_repeat	AZA/ITF	3
(GGAAGAT)n	Simple_repeat	AZA/ITF	3
(GGAAT)n	Simple_repeat	AZA/ITF	3
(GGAGCAG)n	Simple_repeat	AZA/ITF	3
(GGAGGCA)n	Simple_repeat	AZA/ITF	3
(GGCAGC)n	Simple_repeat	AZA/ITF	3
(GGCAGG)n	Simple_repeat	AZA/ITF	3
(GGGCA)n	Simple_repeat	AZA/ITF	3
(GTGAG)n	Simple_repeat	AZA/ITF	3
(TCCTGC)n	Simple_repeat	AZA/ITF	3
(TGTCTG)n	Simple_repeat	AZA/ITF	3
(TGTTCTC)n	Simple_repeat	AZA/ITF	3
(TTCTTTC)n	Simple_repeat	AZA/ITF	3
(TTGCTG)n	Simple_repeat	AZA/ITF	3
(TTTCCCT)n	Simple_repeat	AZA/ITF	3
ACRO1	Satellite	AZA/ITF	3
ALR/Alpha	Satellite	AZA/ITF	3
HERV-Fc1-int	LTR	AZA/ITF	3
HERVI-int	LTR	AZA/ITF	3
HERVKC4-int	LTR	AZA/ITF	3
L1P4b	LINE	AZA/ITF	3
LTR109A2	LTR	AZA/ITF	3
LTR10B1	LTR	AZA/ITF	3
tRNA-Gln-CAA	tRNA	AZA/ITF	3
UCON17	Unknown	AZA/ITF	3
(AAGAATG)n	Simple_repeat	ITF	3
(AAGAGGC)n	Simple_repeat	ITF	3
(AATATG)n	Simple_repeat	ITF	3
(ACAAG)n	Simple_repeat	ITF	3
(AGAAC)n	Simple_repeat	ITF	3
(AGAGAGC)n	Simple_repeat	ITF	3
(CAATT)n	Simple_repeat	ITF	3
(CAGGAT)n	Simple_repeat	ITF	3
(CAGTAG)n	Simple_repeat	ITF	3
(CATAAT)n	Simple_repeat	ITF	3
(CATCTC)n	Simple_repeat	ITF	3
(CCATCC)n	Simple_repeat	ITF	3
(CCCAC)n	Simple_repeat	ITF	3
(CCCCTC)n	Simple_repeat	ITF	3
(CCGCC)n	Simple_repeat	ITF	3
(CCTCCCT)n	Simple_repeat	ITF	3
(CCTGCTC)n	Simple_repeat	ITF	3
(CTCTG)n	Simple_repeat	ITF	3
(CTTGAC)n	Simple_repeat	ITF	3
(CTTTCAT)n	Simple_repeat	ITF	3
(GAAC)n	Simple_repeat	ITF	3
(GCAGCA)n	Simple_repeat	ITF	3
(GCCCGCC)n	Simple_repeat	ITF	3
(GCGCGG)n	Simple_repeat	ITF	3
(GGAGGCA)n	Simple_repeat	ITF	3
(GGCGC)n	Simple_repeat	ITF	3
(GTTTCTT)n	Simple_repeat	ITF	3
(TAATAGT)n	Simple_repeat	ITF	3
(TCTACC)n	Simple_repeat	ITF	3
(TCTGTG)n	Simple_repeat	ITF	3
(TCTTAC)n	Simple_repeat	ITF	3
(TGGG)n	Simple_repeat	ITF	3
(TTCATTC)n	Simple_repeat	ITF	3
(TTTCCCT)n	Simple_repeat	ITF	3
HERVK11D-int	LTR	ITF	3
L1P4c	LINE	ITF	3
LSU-rRNA_Hsa	rRNA	ITF	3
SSU-rRNA_Hsa	rRNA	ITF	3
UCON17	Unknown	ITF	3
UCON85	Unknown	ITF	3
(AAAAAAC)n	Simple_repeat	AZA	2
(AAAAACA)n	Simple_repeat	AZA	2
(AAAGAA)n	Simple_repeat	AZA	2
(AAATTT)n	Simple_repeat	AZA	2
(AACAAC)n	Simple_repeat	AZA	2
(AACAATT)n	Simple_repeat	AZA	2
(AACATT)n	Simple_repeat	AZA	2
(AACTGA)n	Simple_repeat	AZA	2
(AAGAG)n	Simple_repeat	AZA	2
(AAGATAT)n	Simple_repeat	AZA	2
(AATATG)n	Simple_repeat	AZA	2
(ACAAG)n	Simple_repeat	AZA	2
(ACAAGA)n	Simple_repeat	AZA	2
(ACCA)n	Simple_repeat	AZA	2
(ACCAG)n	Simple_repeat	AZA	2
(ACCT)n	Simple_repeat	AZA	2
(ACGC)n	Simple_repeat	AZA	2
(AGAGA)n	Simple_repeat	AZA	2
(AGAGCA)n	Simple_repeat	AZA	2
(AGATTT)n	Simple_repeat	AZA	2
(AGCAG)n	Simple_repeat	AZA	2
(AGGCC)n	Simple_repeat	AZA	2
(AGTTTTT)n	Simple_repeat	AZA	2
(ATAAGAA)n	Simple_repeat	AZA	2
(ATAATAT)n	Simple_repeat	AZA	2
(ATAATTT)n	Simple_repeat	AZA	2
(ATACAA)n	Simple_repeat	AZA	2
(ATACAGA)n	Simple_repeat	AZA	2
(ATAGAA)n	Simple_repeat	AZA	2
(ATAGT)n	Simple_repeat	AZA	2
(ATATAGT)n	Simple_repeat	AZA	2
(ATATGC)n	Simple_repeat	AZA	2
(ATCTAT)n	Simple_repeat	AZA	2
(ATCTTAA)n	Simple_repeat	AZA	2
(ATGAAT)n	Simple_repeat	AZA	2
(ATGAT)n	Simple_repeat	AZA	2
(ATTAACT)n	Simple_repeat	AZA	2
(ATTACA)n	Simple_repeat	AZA	2
(ATTATAA)n	Simple_repeat	AZA	2
(ATTCC)n	Simple_repeat	AZA	2
(ATTTCA)n	Simple_repeat	AZA	2
(ATTTCAT)n	Simple_repeat	AZA	2
(ATTTG)n	Simple_repeat	AZA	2
(ATTTTAC)n	Simple_repeat	AZA	2
(CAATT)n	Simple_repeat	AZA	2
(CACCCC)n	Simple_repeat	AZA	2
(CACCCGC)n	Simple_repeat	AZA	2
(CACCG)n	Simple_repeat	AZA	2
(CACG)n	Simple_repeat	AZA	2
(CACTC)n	Simple_repeat	AZA	2
(CACTTTT)n	Simple_repeat	AZA	2
(CAGAGGT)n	Simple_repeat	AZA	2
(CAGCAT)n	Simple_repeat	AZA	2
(CAGCT)n	Simple_repeat	AZA	2
(CAGTAG)n	Simple_repeat	AZA	2
(CAGTGG)n	Simple_repeat	AZA	2
(CATAG)n	Simple_repeat	AZA	2
(CATATA)n	Simple_repeat	AZA	2
(CATTAT)n	Simple_repeat	AZA	2
(CATTC)n	Simple_repeat	AZA	2
(CCACAC)n	Simple_repeat	AZA	2
(CCAGTC)n	Simple_repeat	AZA	2
(CCCAC)n	Simple_repeat	AZA	2
(CCCCAT)n	Simple_repeat	AZA	2
(CCCCGC)n	Simple_repeat	AZA	2
(CCCCTC)n	Simple_repeat	AZA	2
(CCCCTG)n	Simple_repeat	AZA	2
(CCCG)n	Simple_repeat	AZA	2
(CCCGCT)n	Simple_repeat	AZA	2
(CCCGTC)n	Simple_repeat	AZA	2
(CCCTGG)n	Simple_repeat	AZA	2
(CCCTGT)n	Simple_repeat	AZA	2
(CCCTTG)n	Simple_repeat	AZA	2
(CCGCCT)n	Simple_repeat	AZA	2
(CCTA)n	Simple_repeat	AZA	2
(CCTCAC)n	Simple_repeat	AZA	2
(CCTCCTG)n	Simple_repeat	AZA	2
(CCTCTCT)n	Simple_repeat	AZA	2
(CCTCTG)n	Simple_repeat	AZA	2
(CCTGCCC)n	Simple_repeat	AZA	2
(CCTGCT)n	Simple_repeat	AZA	2
(CCTGCTC)n	Simple_repeat	AZA	2
(CCTGGA)n	Simple_repeat	AZA	2
(CCTTG)n	Simple_repeat	AZA	2
(CCTTTTT)n	Simple_repeat	AZA	2
(CGCCCA)n	Simple_repeat	AZA	2
(CGCT)n	Simple_repeat	AZA	2
(CTAACC)n	Simple_repeat	AZA	2
(CTATAT)n	Simple_repeat	AZA	2
(CTCCTTT)n	Simple_repeat	AZA	2
(CTCTCCC)n	Simple_repeat	AZA	2
(CTCTCCTT)n	Simple_repeat	AZA	2
(CTCTGC)n	Simple_repeat	AZA	2
(CTGTTT)n	Simple_repeat	AZA	2
(CTTAATA)n	Simple_repeat	AZA	2
(CTTATTT)n	Simple_repeat	AZA	2
(CTTCTG)n	Simple_repeat	AZA	2
(CTTGAT)n	Simple_repeat	AZA	2
(GAAGA)n	Simple_repeat	AZA	2
(GAATAT)n	Simple_repeat	AZA	2
(GAATTA)n	Simple_repeat	AZA	2
(GAGCGA)n	Simple_repeat	AZA	2
(GAGGTCA)n	Simple_repeat	AZA	2
(GATATT)n	Simple_repeat	AZA	2
(GATGGA)n	Simple_repeat	AZA	2
(GATTTGA)n	Simple_repeat	AZA	2
(GCCAG)n	Simple_repeat	AZA	2
(GCCCGCC)n	Simple_repeat	AZA	2
(GCCGCA)n	Simple_repeat	AZA	2
(GCTACG)n	Simple_repeat	AZA	2
(GCTCT)n	Simple_repeat	AZA	2
(GCTGA)n	Simple_repeat	AZA	2
(GGAATGG)n	Simple_repeat	AZA	2
(GGAGGCG)n	Simple_repeat	AZA	2
(GGCACA)n	Simple_repeat	AZA	2
(GGGAT)n	Simple_repeat	AZA	2
(GTC)n	Simple_repeat	AZA	2
(GTGAGA)n	Simple_repeat	AZA	2
(GTGCAT)n	Simple_repeat	AZA	2
(GTTTCT)n	Simple_repeat	AZA	2
(TAAAT)n	Simple_repeat	AZA	2
(TAACTA)n	Simple_repeat	AZA	2
(TAAGTAA)n	Simple_repeat	AZA	2
(TAAGTT)n	Simple_repeat	AZA	2
(TAATCA)n	Simple_repeat	AZA	2
(TAATGAA)n	Simple_repeat	AZA	2
(TACAA)n	Simple_repeat	AZA	2
(TACTT)n	Simple_repeat	AZA	2
(TAGTA)n	Simple_repeat	AZA	2
(TATCA)n	Simple_repeat	AZA	2
(TATGAA)n	Simple_repeat	AZA	2
(TATTAAT)n	Simple_repeat	AZA	2
(TATTATA)n	Simple_repeat	AZA	2
(TATTG)n	Simple_repeat	AZA	2
(TATTTAT)n	Simple_repeat	AZA	2
(TCAGCTC)n	Simple_repeat	AZA	2
(TCCATCC)n	Simple_repeat	AZA	2
(TCCCCT)n	Simple_repeat	AZA	2
(TCCCTTT)n	Simple_repeat	AZA	2
(TCCTCCC)n	Simple_repeat	AZA	2
(TCCTTC)n	Simple_repeat	AZA	2
(TCTCTAT)n	Simple_repeat	AZA	2
(TCTTCTC)n	Simple_repeat	AZA	2
(TCTTTCC)n	Simple_repeat	AZA	2
(TGAAGT)n	Simple_repeat	AZA	2
(TGAATA)n	Simple_repeat	AZA	2
(TGAC)n	Simple_repeat	AZA	2
(TGACTGG)n	Simple_repeat	AZA	2
(TGCCTC)n	Simple_repeat	AZA	2
(TGGG)n	Simple_repeat	AZA	2
(TGGGAC)n	Simple_repeat	AZA	2
(TGGTGC)n	Simple_repeat	AZA	2
(TGTACA)n	Simple_repeat	AZA	2
(TGTTA)n	Simple_repeat	AZA	2
(TGTTTTG)n	Simple_repeat	AZA	2
(TTAACA)n	Simple_repeat	AZA	2
(TTACTTA)n	Simple_repeat	AZA	2
(TTATTTCT)n	Simple_repeat	AZA	2
(TTCAGTTA)n	Simple_repeat	AZA	2
(TTCCAC)n	Simple_repeat	AZA	2
(TTCCCC)n	Simple_repeat	AZA	2
(TTCCTA)n	Simple_repeat	AZA	2
(TTCTATT)n	Simple_repeat	AZA	2
(TTCTCTC)n	Simple_repeat	AZA	2
(TTCTTAA)n	Simple_repeat	AZA	2
(TTGTTTC)n	Simple_repeat	AZA	2
(TTTCCTC)n	Simple_repeat	AZA	2
(TTTCTAA)n	Simple_repeat	AZA	2
(TTTCTAT)n	Simple_repeat	AZA	2
(TTTGTA)n	Simple_repeat	AZA	2
(TTTTAG)n	Simple_repeat	AZA	2
(TTTTCTG)n	Simple_repeat	AZA	2
(TTTTTCC)n	Simple_repeat	AZA	2
7SK	RNA	AZA	2
Eulor12	DNA?	AZA	2
Eulor6A	DNA?	AZA	2
EUTREP15	LTR	AZA	2
HERV-Fc1-int	LTR	AZA	2
HERV-Fc1_LTR1	LTR	AZA	2
HERV-Fc2-int	LTR	AZA	2
HERVE_a-int	LTR	AZA	2
HERVI-int	LTR	AZA	2
HERVIP10B3-int	LTR	AZA	2
HSAT4	Satellite	AZA	2
LTR109A2	LTR	AZA	2
LTR10B	LTR	AZA	2
LTR1B0	LTR	AZA	2
LTR1C	LTR	AZA	2
LTR39-int	LTR	AZA	2
LTR73	LTR	AZA	2
PABL_B	LTR	AZA	2
polypurine	Low_complexity	AZA	2
PRIMAX-int	LTR	AZA	2
SAR	Satellite	AZA	2
tRNA-Ala-GCA	tRNA	AZA	2
tRNA-Asn-AAC	tRNA	AZA	2
tRNA-Gln-CAA	tRNA	AZA	2
tRNA-Gln-CAA_	tRNA	AZA	2
tRNA-Gly-GGA	tRNA	AZA	2
tRNA-Gly-GGY	tRNA	AZA	2
tRNA-Ile-ATT	tRNA	AZA	2
tRNA-Leu-CTA_	tRNA	AZA	2
tRNA-Met-i	tRNA	AZA	2
tRNA-Met_	tRNA	AZA	2
tRNA-Ser-AGY	tRNA	AZA	2
tRNA-Thr-ACA	tRNA	AZA	2
tRNA-Tyr-TAC	tRNA	AZA	2
tRNA-Val-GTG	tRNA	AZA	2
tRNA-Val-GTY	tRNA	AZA	2
U3	snRNA	AZA	2
UCON100	DNA?	AZA	2
UCON17	Unknown	AZA	2
UCON61	Unknown	AZA	2
(AAAAAAC)n	Simple_repeat	AZA/ITF	2
(AAAAAG)n	Simple_repeat	AZA/ITF	2
(AAAAAT)n	Simple_repeat	AZA/ITF	2
(AAAGAG)n	Simple_repeat	AZA/ITF	2
(AAAGGA)n	Simple_repeat	AZA/ITF	2
(AACAAC)n	Simple_repeat	AZA/ITF	2
(AACAGT)n	Simple_repeat	AZA/ITF	2
(AAGAAA)n	Simple_repeat	AZA/ITF	2
(AAGAG)n	Simple_repeat	AZA/ITF	2
(AAGAGGC)n	Simple_repeat	AZA/ITF	2
(AAGATTA)n	Simple_repeat	AZA/ITF	2
(AAGCAA)n	Simple_repeat	AZA/ITF	2
(AAGCAC)n	Simple_repeat	AZA/ITF	2
(AAGGG)n	Simple_repeat	AZA/ITF	2
(AATAAG)n	Simple_repeat	AZA/ITF	2
(AATATC)n	Simple_repeat	AZA/ITF	2
(AATATG)n	Simple_repeat	AZA/ITF	2
(AATATGT)n	Simple_repeat	AZA/ITF	2
(AATATTA)n	Simple_repeat	AZA/ITF	2
(AATATTG)n	Simple_repeat	AZA/ITF	2
(AATCTATA)n	Simple_repeat	AZA/ITF	2
(AATGG)n	Simple_repeat	AZA/ITF	2
(AATGTT)n	Simple_repeat	AZA/ITF	2
(AATTCC)n	Simple_repeat	AZA/ITF	2
(ACAAGA)n	Simple_repeat	AZA/ITF	2
(ACACC)n	Simple_repeat	AZA/ITF	2
(ACAGG)n	Simple_repeat	AZA/ITF	2
(ACATA)n	Simple_repeat	AZA/ITF	2
(ACATAA)n	Simple_repeat	AZA/ITF	2
(ACCACC)n	Simple_repeat	AZA/ITF	2
(ACCCTA)n	Simple_repeat	AZA/ITF	2
(ACCTCCC)n	Simple_repeat	AZA/ITF	2
(AGAAC)n	Simple_repeat	AZA/ITF	2
(AGAGA)n	Simple_repeat	AZA/ITF	2
(AGAGAG)n	Simple_repeat	AZA/ITF	2
(AGAGAGC)n	Simple_repeat	AZA/ITF	2
(AGATCT)n	Simple_repeat	AZA/ITF	2
(AGCA)n	Simple_repeat	AZA/ITF	2
(AGCAGG)n	Simple_repeat	AZA/ITF	2
(AGCTCC)n	Simple_repeat	AZA/ITF	2
(AGGATGG)n	Simple_repeat	AZA/ITF	2
(AGGCAGC)n	Simple_repeat	AZA/ITF	2
(AGGCAGG)n	Simple_repeat	AZA/ITF	2
(AGGCTG)n	Simple_repeat	AZA/ITF	2
(AGGG)n	Simple_repeat	AZA/ITF	2
(AGGGG)n	Simple_repeat	AZA/ITF	2
(AGGTTG)n	Simple_repeat	AZA/ITF	2
(AGTGA)n	Simple_repeat	AZA/ITF	2
(ATAAGAA)n	Simple_repeat	AZA/ITF	2
(ATAATAT)n	Simple_repeat	AZA/ITF	2
(ATAGAA)n	Simple_repeat	AZA/ITF	2
(ATATATT)n	Simple_repeat	AZA/ITF	2
(ATGAA)n	Simple_repeat	AZA/ITF	2
(ATGAGG)n	Simple_repeat	AZA/ITF	2
(ATGCAA)n	Simple_repeat	AZA/ITF	2
(ATGGTG)n	Simple_repeat	AZA/ITF	2
(ATGTAC)n	Simple_repeat	AZA/ITF	2
(ATTCC)n	Simple_repeat	AZA/ITF	2
(ATTGC)n	Simple_repeat	AZA/ITF	2
(ATTTACC)n	Simple_repeat	AZA/ITF	2
(ATTTTGT)n	Simple_repeat	AZA/ITF	2
(C)n	Simple_repeat	AZA/ITF	2
(CAACAT)n	Simple_repeat	AZA/ITF	2
(CAATT)n	Simple_repeat	AZA/ITF	2
(CACAC)n	Simple_repeat	AZA/ITF	2
(CACACC)n	Simple_repeat	AZA/ITF	2
(CACCAG)n	Simple_repeat	AZA/ITF	2
(CACCCA)n	Simple_repeat	AZA/ITF	2
(CACCCC)n	Simple_repeat	AZA/ITF	2
(CACCCGC)n	Simple_repeat	AZA/ITF	2
(CACCTC)n	Simple_repeat	AZA/ITF	2
(CACCTGA)n	Simple_repeat	AZA/ITF	2
(CACCTGC)n	Simple_repeat	AZA/ITF	2
(CAGAAG)n	Simple_repeat	AZA/ITF	2
(CAGAAGCA)n	Simple_repeat	AZA/ITF	2
(CAGACC)n	Simple_repeat	AZA/ITF	2
(CAGAGA)n	Simple_repeat	AZA/ITF	2
(CAGAGG)n	Simple_repeat	AZA/ITF	2
(CAGCAC)n	Simple_repeat	AZA/ITF	2
(CAGCAG)n	Simple_repeat	AZA/ITF	2
(CAGCAT)n	Simple_repeat	AZA/ITF	2
(CAGCC)n	Simple_repeat	AZA/ITF	2
(CAGCCCC)n	Simple_repeat	AZA/ITF	2
(CAGGAA)n	Simple_repeat	AZA/ITF	2
(CAGGG)n	Simple_repeat	AZA/ITF	2
(CAGGTG)n	Simple_repeat	AZA/ITF	2
(CAGTAG)n	Simple_repeat	AZA/ITF	2
(CAGTGG)n	Simple_repeat	AZA/ITF	2
(CATAATA)n	Simple_repeat	AZA/ITF	2
(CATC)n	Simple_repeat	AZA/ITF	2
(CATCAC)n	Simple_repeat	AZA/ITF	2
(CATCT)n	Simple_repeat	AZA/ITF	2
(CATCTC)n	Simple_repeat	AZA/ITF	2
(CATTC)n.Simple_repeat	Simple_repeat	AZA/ITF	2
(CATTCT)n	Simple_repeat	AZA/ITF	2
(CCAC)n	Simple_repeat	AZA/ITF	2
(CCACCTG)n	Simple_repeat	AZA/ITF	2
(CCACTG)n	Simple_repeat	AZA/ITF	2
(CCAGAG)n	Simple_repeat	AZA/ITF	2
(CCAGCCC)n	Simple_repeat	AZA/ITF	2
(CCAGGCC)n	Simple_repeat	AZA/ITF	2
(CCATCA)n	Simple_repeat	AZA/ITF	2
(CCATTT)n	Simple_repeat	AZA/ITF	2
(CCCAC)n	Simple_repeat	AZA/ITF	2
(CCCACA)n	Simple_repeat	AZA/ITF	2
(CCCACC)n	Simple_repeat	AZA/ITF	2
(CCCACT)n	Simple_repeat	AZA/ITF	2
(CCCAG)n	Simple_repeat	AZA/ITF	2
(CCCAGAC)n	Simple_repeat	AZA/ITF	2
(CCCAGC)n	Simple_repeat	AZA/ITF	2
(CCCAGG)n	Simple_repeat	AZA/ITF	2
(CCCCAGG)n	Simple_repeat	AZA/ITF	2
(CCCCCG)n	Simple_repeat	AZA/ITF	2
(CCCCCGG)n	Simple_repeat	AZA/ITF	2
(CCCCG)n	Simple_repeat	AZA/ITF	2
(CCCCGC)n	Simple_repeat	AZA/ITF	2
(CCCCTC)n	Simple_repeat	AZA/ITF	2
(CCCCTGA)n	Simple_repeat	AZA/ITF	2
(CCCCTGC)n	Simple_repeat	AZA/ITF	2
(CCCCTT)n	Simple_repeat	AZA/ITF	2
(CCCG)n	Simple_repeat	AZA/ITF	2
(CCCGCC)n	Simple_repeat	AZA/ITF	2
(CCCGCT)n	Simple_repeat	AZA/ITF	2
(CCCGT)n	Simple_repeat	AZA/ITF	2
(CCCTCC)n	Simple_repeat	AZA/ITF	2
(CCCTCTC)n	Simple_repeat	AZA/ITF	2
(CCCTCTG)n	Simple_repeat	AZA/ITF	2
(CCCTCTT)n	Simple_repeat	AZA/ITF	2
(CCCTGT)n	Simple_repeat	AZA/ITF	2
(CCCTTG)n	Simple_repeat	AZA/ITF	2
(CCGCAG)n	Simple_repeat	AZA/ITF	2
(CCGCCA)n	Simple_repeat	AZA/ITF	2
(CCGCG)n	Simple_repeat	AZA/ITF	2
(CCGCGC)n	Simple_repeat	AZA/ITF	2
(CCGCGG)n	Simple_repeat	AZA/ITF	2
(CCT)n	Simple_repeat	AZA/ITF	2
(CCTAAT)n	Simple_repeat	AZA/ITF	2
(CCTCAC)n	Simple_repeat	AZA/ITF	2
(CCTCCC)n	Simple_repeat	AZA/ITF	2
(CCTCCCT)n	Simple_repeat	AZA/ITF	2
(CCTCGT)n	Simple_repeat	AZA/ITF	2
(CCTCTCA)n	Simple_repeat	AZA/ITF	2
(CCTCTG)n	Simple_repeat	AZA/ITF	2
(CCTGCT)n	Simple_repeat	AZA/ITF	2
(CCTGGA)n	Simple_repeat	AZA/ITF	2
(CCTGGC)n	Simple_repeat	AZA/ITF	2
(CCTGGCT)n	Simple_repeat	AZA/ITF	2
(CCTTCA)n	Simple_repeat	AZA/ITF	2
(CCTTCCT)n	Simple_repeat	AZA/ITF	2
(CGG)n	Simple_repeat	AZA/ITF	2
(CGGAGC)n	Simple_repeat	AZA/ITF	2
(CGGGGC)n	Simple_repeat	AZA/ITF	2
(CTAA)n	Simple_repeat	AZA/ITF	2
(CTAACA)n	Simple_repeat	AZA/ITF	2
(CTCAC)n	Simple_repeat	AZA/ITF	2
(CTCAG)n	Simple_repeat	AZA/ITF	2
(CTCAGGC)n	Simple_repeat	AZA/ITF	2
(CTCCAC)n	Simple_repeat	AZA/ITF	2
(CTCCACT)n	Simple_repeat	AZA/ITF	2
(CTCCAG)n	Simple_repeat	AZA/ITF	2
(CTCCAGC)n	Simple_repeat	AZA/ITF	2
(CTCCCA)n	Simple_repeat	AZA/ITF	2
(CTCCCAC)n	Simple_repeat	AZA/ITF	2
(CTCCCTC)n	Simple_repeat	AZA/ITF	2
(CTCCG)n	Simple_repeat	AZA/ITF	2
(CTCCTCC)n	Simple_repeat	AZA/ITF	2
(CTCCTTT)n	Simple_repeat	AZA/ITF	2
(CTCGC)n	Simple_repeat	AZA/ITF	2
(CTCTG)n	Simple_repeat	AZA/ITF	2
(CTCTGC)n	Simple_repeat	AZA/ITF	2
(CTCTTCT)n	Simple_repeat	AZA/ITF	2
(CTGAGG)n	Simple_repeat	AZA/ITF	2
(CTGCAG)n	Simple_repeat	AZA/ITF	2
(CTGCCA)n	Simple_repeat	AZA/ITF	2
(CTGCCC)n	Simple_repeat	AZA/ITF	2
(CTGCCCT)n	Simple_repeat	AZA/ITF	2
(CTGCGG)n	Simple_repeat	AZA/ITF	2
(CTGGT)n	Simple_repeat	AZA/ITF	2
(CTGTCG)n	Simple_repeat	AZA/ITF	2
(CTGTGAA)n	Simple_repeat	AZA/ITF	2
(CTTCAT)n	Simple_repeat	AZA/ITF	2
(CTTCCC)n	Simple_repeat	AZA/ITF	2
(CTTCCT)n	Simple_repeat	AZA/ITF	2
(CTTCCTT)n	Simple_repeat	AZA/ITF	2
(CTTCTCC)n	Simple_repeat	AZA/ITF	2
(CTTCTT)n	Simple_repeat	AZA/ITF	2
(CTTGAC)n	Simple_repeat	AZA/ITF	2
(CTTGAT)n	Simple_repeat	AZA/ITF	2
(CTTGGC)n	Simple_repeat	AZA/ITF	2
(GAAGA)n	Simple_repeat	AZA/ITF	2
(GACAGA)n	Simple_repeat	AZA/ITF	2
(GACCCCC)n	Simple_repeat	AZA/ITF	2
(GACG)n	Simple_repeat	AZA/ITF	2
(GACGG)n	Simple_repeat	AZA/ITF	2
(GAGAGAT)n	Simple_repeat	AZA/ITF	2
(GAGAGG)n	Simple_repeat	AZA/ITF	2
(GAGAT)n	Simple_repeat	AZA/ITF	2
(GAGC)n	Simple_repeat	AZA/ITF	2
(GAGCAG)n	Simple_repeat	AZA/ITF	2
(GAGCGA)n	Simple_repeat	AZA/ITF	2
(GAGCTGG)n	Simple_repeat	AZA/ITF	2
(GAGGTCA)n	Simple_repeat	AZA/ITF	2
(GAGGTG)n	Simple_repeat	AZA/ITF	2
(GATACA)n	Simple_repeat	AZA/ITF	2
(GATGACGAT)n	Simple_repeat	AZA/ITF	2
(GATGGA)n	Simple_repeat	AZA/ITF	2
(GATGGT)n	Simple_repeat	AZA/ITF	2
(GATTTGA)n	Simple_repeat	AZA/ITF	2
(GCAAA)n	Simple_repeat	AZA/ITF	2
(GCACA)n	Simple_repeat	AZA/ITF	2
(GCACAC)n	Simple_repeat	AZA/ITF	2
(GCAG)n	Simple_repeat	AZA/ITF	2
(GCAGCT)n	Simple_repeat	AZA/ITF	2
(GCAGG)n	Simple_repeat	AZA/ITF	2
(GCAGGA)n	Simple_repeat	AZA/ITF	2
(GCAGTG)n	Simple_repeat	AZA/ITF	2
(GCCA)n	Simple_repeat	AZA/ITF	2
(GCCAAG)n	Simple_repeat	AZA/ITF	2
(GCCAGG)n	Simple_repeat	AZA/ITF	2
(GCCC)n	Simple_repeat	AZA/ITF	2
(GCCCAG)n	Simple_repeat	AZA/ITF	2
(GCCCAT)n	Simple_repeat	AZA/ITF	2
(GCCCGC)n	Simple_repeat	AZA/ITF	2
(GCCCGCC)n	Simple_repeat	AZA/ITF	2
(GCCCT)n	Simple_repeat	AZA/ITF	2
(GCCCTG)n	Simple_repeat	AZA/ITF	2
(GCCCTGG)n	Simple_repeat	AZA/ITF	2
(GCCGCA)n	Simple_repeat	AZA/ITF	2
(GCCGCG)n	Simple_repeat	AZA/ITF	2
(GCCGGG)n	Simple_repeat	AZA/ITF	2
(GCCTCT)n	Simple_repeat	AZA/ITF	2
(GCCTG)n	Simple_repeat	AZA/ITF	2
(GCCTGCA)n	Simple_repeat	AZA/ITF	2
(GCCTGG)n	Simple_repeat	AZA/ITF	2
(GCGA)n	Simple_repeat	AZA/ITF	2
(GCGCC)n	Simple_repeat	AZA/ITF	2
(GCGGCGG)n	Simple_repeat	AZA/ITF	2
(GCGGTG)n	Simple_repeat	AZA/ITF	2
(GCGT)n	Simple_repeat	AZA/ITF	2
(GCTCCGA)n	Simple_repeat	AZA/ITF	2
(GCTG)n	Simple_repeat	AZA/ITF	2
(GCTGC)n	Simple_repeat	AZA/ITF	2
(GCTGCT)n	Simple_repeat	AZA/ITF	2
(GGAA)n	Simple_repeat	AZA/ITF	2
(GGAACA)n	Simple_repeat	AZA/ITF	2
(GGAATGGAAT)n	Simple_repeat	AZA/ITF	2
(GGACA)n	Simple_repeat	AZA/ITF	2
(GGAGCC)n	Simple_repeat	AZA/ITF	2
(GGAGCG)n	Simple_repeat	AZA/ITF	2
(GGAGGC)n	Simple_repeat	AZA/ITF	2
(GGAGGT)n	Simple_repeat	AZA/ITF	2
(GGAGTGG)n	Simple_repeat	AZA/ITF	2
(GGATTA)n	Simple_repeat	AZA/ITF	2
(GGCAG)n	Simple_repeat	AZA/ITF	2
(GGCAGCA)n	Simple_repeat	AZA/ITF	2
(GGCAGGT)n	Simple_repeat	AZA/ITF	2
(GGCCAG)n	Simple_repeat	AZA/ITF	2
(GGCCCA)n	Simple_repeat	AZA/ITF	2
(GGCCGA)n	Simple_repeat	AZA/ITF	2
(GGCGCT)n	Simple_repeat	AZA/ITF	2
(GGCGGC)n	Simple_repeat	AZA/ITF	2
(GGCTCC)n	Simple_repeat	AZA/ITF	2
(GGCTG)n	Simple_repeat	AZA/ITF	2
(GGCTGA)n	Simple_repeat	AZA/ITF	2
(GGCTGC)n	Simple_repeat	AZA/ITF	2
(GGCTGGA)n	Simple_repeat	AZA/ITF	2
(GGGAG)n	Simple_repeat	AZA/ITF	2
(GGGCT)n	Simple_repeat	AZA/ITF	2
(GGGGT)n	Simple_repeat	AZA/ITF	2
(GGGT)n	Simple_repeat	AZA/ITF	2
(GGTGGA)n	Simple_repeat	AZA/ITF	2
(GGTGGC)n	Simple_repeat	AZA/ITF	2
(GGTGT)n	Simple_repeat	AZA/ITF	2
(GTCA)n	Simple_repeat	AZA/ITF	2
(GTCCCT)n	Simple_repeat	AZA/ITF	2
(GTCTGC)n	Simple_repeat	AZA/ITF	2
(GTCTGT)n	Simple_repeat	AZA/ITF	2
(GTGAGA)n	Simple_repeat	AZA/ITF	2
(GTGATG)n	Simple_repeat	AZA/ITF	2
(GTGCAT)n	Simple_repeat	AZA/ITF	2
(GTGTGG)n	Simple_repeat	AZA/ITF	2
(GTTCAT)n	Simple_repeat	AZA/ITF	2
(GTTTCT)n	Simple_repeat	AZA/ITF	2
(GTTTCTT)n	Simple_repeat	AZA/ITF	2
(GTTTG)n	Simple_repeat	AZA/ITF	2
(TAAAAA)n	Simple_repeat	AZA/ITF	2
(TAAG)n	Simple_repeat	AZA/ITF	2
(TAAGA)n	Simple_repeat	AZA/ITF	2
(TACAAT)n	Simple_repeat	AZA/ITF	2
(TACT)n	Simple_repeat	AZA/ITF	2
(TAGAGT)n	Simple_repeat	AZA/ITF	2
(TAGGA)n	Simple_repeat	AZA/ITF	2
(TAGTAT)n	Simple_repeat	AZA/ITF	2
(TATAAG)n	Simple_repeat	AZA/ITF	2
(TATAG)n	Simple_repeat	AZA/ITF	2
(TATATATT)n	Simple_repeat	AZA/ITF	2
(TATCATT)n	Simple_repeat	AZA/ITF	2
(TCAGCA)n	Simple_repeat	AZA/ITF	2
(TCATCC)n	Simple_repeat	AZA/ITF	2
(TCATCG)n	Simple_repeat	AZA/ITF	2
(TCCCCC)n	Simple_repeat	AZA/ITF	2
(TCCCTTT)n	Simple_repeat	AZA/ITF	2
(TCCTG)n	Simple_repeat	AZA/ITF	2
(TCCTGCCC)n	Simple_repeat	AZA/ITF	2
(TCTACC)n	Simple_repeat	AZA/ITF	2
(TCTAT)n	Simple_repeat	AZA/ITF	2
(TCTATCT)n	Simple_repeat	AZA/ITF	2
(TCTCAT)n	Simple_repeat	AZA/ITF	2
(TCTCATT)n	Simple_repeat	AZA/ITF	2
(TCTCCTC)n	Simple_repeat	AZA/ITF	2
(TCTCCTG)n	Simple_repeat	AZA/ITF	2
(TCTCTCA)n	Simple_repeat	AZA/ITF	2
(TCTCTTT)n	Simple_repeat	AZA/ITF	2
(TCTGC)n	Simple_repeat	AZA/ITF	2
(TCTGCT)n	Simple_repeat	AZA/ITF	2
(TCTGTG)n	Simple_repeat	AZA/ITF	2
(TCTTAC)n	Simple_repeat	AZA/ITF	2
(TCTTCCT)n	Simple_repeat	AZA/ITF	2
(TCTTTCC)n	Simple_repeat	AZA/ITF	2
(TGAACA)n	Simple_repeat	AZA/ITF	2
(TGAC)n	Simple_repeat	AZA/ITF	2
(TGAGA)n	Simple_repeat	AZA/ITF	2
(TGAGCCC)n	Simple_repeat	AZA/ITF	2
(TGAGCTC)n	Simple_repeat	AZA/ITF	2
(TGAGTAC)n	Simple_repeat	AZA/ITF	2
(TGAGTG)n	Simple_repeat	AZA/ITF	2
(TGATTTC)n	Simple_repeat	AZA/ITF	2
(TGCCGC)n	Simple_repeat	AZA/ITF	2
(TGCCTC)n	Simple_repeat	AZA/ITF	2
(TGCG)n	Simple_repeat	AZA/ITF	2
(TGCGGC)n	Simple_repeat	AZA/ITF	2
(TGCTCC)n	Simple_repeat	AZA/ITF	2
(TGCTCCC)n	Simple_repeat	AZA/ITF	2
(TGCTCTC)n	Simple_repeat	AZA/ITF	2
(TGCTGT)n	Simple_repeat	AZA/ITF	2
(TGCTTC)n	Simple_repeat	AZA/ITF	2
(TGGAA)n	Simple_repeat	AZA/ITF	2
(TGGAAG)n	Simple_repeat	AZA/ITF	2
(TGGAGA)n	Simple_repeat	AZA/ITF	2
(TGGC)n	Simple_repeat	AZA/ITF	2
(TGGCAG)n	Simple_repeat	AZA/ITF	2
(TGGCCC)n	Simple_repeat	AZA/ITF	2
(TGGG)n	Simple_repeat	AZA/ITF	2
(TGGTG)n	Simple_repeat	AZA/ITF	2
(TGGTGC)n	Simple_repeat	AZA/ITF	2
(TGTACA)n	Simple_repeat	AZA/ITF	2
(TGTGA)n	Simple_repeat	AZA/ITF	2
(TGTGCG)n	Simple_repeat	AZA/ITF	2
(TGTTC)n	Simple_repeat	AZA/ITF	2
(TGTTTTA)n	Simple_repeat	AZA/ITF	2
(TTAAA)n	Simple_repeat	AZA/ITF	2
(TTAACA)n	Simple_repeat	AZA/ITF	2
(TTAACTT)n	Simple_repeat	AZA/ITF	2
(TTAAGAA)n	Simple_repeat	AZA/ITF	2
(TTATGAT)n	Simple_repeat	AZA/ITF	2
(TTCACT)n	Simple_repeat	AZA/ITF	2
(TTCAGT)n	Simple_repeat	AZA/ITF	2
(TTCCAC)n	Simple_repeat	AZA/ITF	2
(TTCCTCA)n	Simple_repeat	AZA/ITF	2
(TTCTCTC)n	Simple_repeat	AZA/ITF	2
(TTCTTA)n	Simple_repeat	AZA/ITF	2
(TTCTTAA)n	Simple_repeat	AZA/ITF	2
(TTCTTGT)n	Simple_repeat	AZA/ITF	2
(TTGGCT)n	Simple_repeat	AZA/ITF	2
(TTTAAG)n	Simple_repeat	AZA/ITF	2
(TTTCTCC)n	Simple_repeat	AZA/ITF	2
(TTTGCT)n	Simple_repeat	AZA/ITF	2
(TTTTAG)n	Simple_repeat	AZA/ITF	2
(TTTTCCC)n	Simple_repeat	AZA/ITF	2
(TTTTTTTG)n	Simple_repeat	AZA/ITF	2
AluSc5	SINE	AZA/ITF	2
AluSp	SINE	AZA/ITF	2
AluSq4	SINE	AZA/ITF	2
AluSx	SINE	AZA/ITF	2
AluSx1	SINE	AZA/ITF	2
AluYa5	SINE	AZA/ITF	2
AluYb8	SINE	AZA/ITF	2
AluYb9	SINE	AZA/ITF	2
AluYc3	SINE	AZA/ITF	2
AluYh7	SINE	AZA/ITF	2
AluYi6_4d	SINE	AZA/ITF	2
AluYj4	SINE	AZA/ITF	2
AluYk12	SINE	AZA/ITF	2
BSR/Beta	Satellite	AZA/ITF	2
CER	Satellite	AZA/ITF	2
D20S16	Satellite	AZA/ITF	2
Eulor6A	DNA?	AZA/ITF	2
FordPrefect	DNA	AZA/ITF	2
GSATX	Satellite	AZA/ITF	2
hAT-16_Crp	DNA	AZA/ITF	2
HERV-Fc1_LTR1	LTR	AZA/ITF	2
HERV-Fc2-int	LTR	AZA/ITF	2
HERV1_LTRc	LTR	AZA/ITF	2
HERV1_LTRd	LTR	AZA/ITF	2
HERV9NC-int	LTR	AZA/ITF	2
HERVE_a-int	LTR	AZA/ITF	2
HERVH-int	LTR	AZA/ITF	2
HERVIP10B3-int	LTR	AZA/ITF	2
HERVK11D-int	LTR	AZA/ITF	2
HERVL18-int	LTR	AZA/ITF	2
HSAT4	Satellite	AZA/ITF	2
L1P4c	LINE	AZA/ITF	2
LSAU	Satellite	AZA/ITF	2
LSU-rRNA_Hsa	rRNA	AZA/ITF	2
LTR1	LTR	AZA/ITF	2
LTR108b_Mam	LTR	AZA/ITF	2
LTR12D	LTR	AZA/ITF	2
LTR1B0	LTR	AZA/ITF	2
LTR1B1	LTR	AZA/ITF	2
LTR1C	LTR	AZA/ITF	2
LTR27C	LTR	AZA/ITF	2
LTR27E	LTR	AZA/ITF	2
LTR3B	LTR	AZA/ITF	2
LTR46-int	LTR	AZA/ITF	2
LTR47B	LTR	AZA/ITF	2
LTR57	LTR	AZA/ITF	2
LTR58	LTR	AZA/ITF	2
MER51C	LTR	AZA/ITF	2
MLT1C-int	LTR	AZA/ITF	2
MLT2B5	LTR	AZA/ITF	2
MSR1	Satellite	AZA/ITF	2
REP522	Satellite	AZA/ITF	2
SAR	Satellite	AZA/ITF	2
SST1	Satellite	AZA/ITF	2
SSU-rRNA_Hsa	rRNA	AZA/ITF	2
SVA_F	Retroposon	AZA/ITF	2
TAR1	Satellite	AZA/ITF	2
tRNA-Ala-GCA	tRNA	AZA/ITF	2
tRNA-Asp-GAY	tRNA	AZA/ITF	2
tRNA-Glu-GAA	tRNA	AZA/ITF	2
tRNA-Gly-GGA	tRNA	AZA/ITF	2
tRNA-Gly-GGY	tRNA	AZA/ITF	2
tRNA-Leu-CTA_	tRNA	AZA/ITF	2
tRNA-Leu-TTA	tRNA	AZA/ITF	2
tRNA-Lys-AAG	tRNA	AZA/ITF	2
tRNA-Met	tRNA	AZA/ITF	2
tRNA-Met-i	tRNA	AZA/ITF	2
tRNA-Met_	tRNA	AZA/ITF	2
tRNA-Phe-TTY	tRNA	AZA/ITF	2
tRNA-Ser-AGY	tRNA	AZA/ITF	2
tRNA-Tyr-TAC	tRNA	AZA/ITF	2
tRNA-Val-GTA	tRNA	AZA/ITF	2
tRNA-Val-GTG	tRNA	AZA/ITF	2
U1	snRNA	AZA/ITF	2
UCON100	DNA?	AZA/ITF	2
UCON21	DNA?	AZA/ITF	2
UCON97	DNA	AZA/ITF	2
(AAAAAG)n	Simple_repeat	ITF	2
(AAAGAA)n	Simple_repeat	ITF	2
(AAATTT)n	Simple_repeat	ITF	2
(AACAAC)n	Simple_repeat	ITF	2
(AACATT)n	Simple_repeat	ITF	2
(AAGAAA)n	Simple_repeat	ITF	2
(AAGCCA)n	Simple_repeat	ITF	2
(AATATCA)n	Simple_repeat	ITF	2
(AATGTT)n	Simple_repeat	ITF	2
(ACACAA)n	Simple_repeat	ITF	2
(ACACC)n	Simple_repeat	ITF	2
(ACAGA)n	Simple_repeat	ITF	2
(ACCCCC)n	Simple_repeat	ITF	2
(ACCTCC)n	Simple_repeat	ITF	2
(ACT)n	Simple_repeat	ITF	2
(ACTTT)n	Simple_repeat	ITF	2
(AGAAGC)n	Simple_repeat	ITF	2
(AGAGAG)n	Simple_repeat	ITF	2
(AGAGGTC)n	Simple_repeat	ITF	2
(AGAGTG)n	Simple_repeat	ITF	2
(AGCTCC)n	Simple_repeat	ITF	2
(AGCTG)n	Simple_repeat	ITF	2
(AGGAAC)n	Simple_repeat	ITF	2
(AGGCAGG)n	Simple_repeat	ITF	2
(AGGCC)n	Simple_repeat	ITF	2
(AGGCCC)n	Simple_repeat	ITF	2
(AGGTGC)n	Simple_repeat	ITF	2
(AGTTTTG)n	Simple_repeat	ITF	2
(ATAAAA)n	Simple_repeat	ITF	2
(ATAAG)n	Simple_repeat	ITF	2
(ATAAGAA)n	Simple_repeat	ITF	2
(ATAGT)n	Simple_repeat	ITF	2
(ATATATA)n	Simple_repeat	ITF	2
(ATATTTG)n	Simple_repeat	ITF	2
(ATCAT)n	Simple_repeat	ITF	2
(ATCATT)n	Simple_repeat	ITF	2
(ATCTC)n	Simple_repeat	ITF	2
(ATCTGT)n	Simple_repeat	ITF	2
(ATCTT)n	Simple_repeat	ITF	2
(ATGAGG)n	Simple_repeat	ITF	2
(ATGC)n	Simple_repeat	ITF	2
(ATGCAA)n	Simple_repeat	ITF	2
(ATTAAT)n	Simple_repeat	ITF	2
(ATTACA)n	Simple_repeat	ITF	2
(ATTCC)n	Simple_repeat	ITF	2
(ATTCTG)n	Simple_repeat	ITF	2
(CAATGA)n	Simple_repeat	ITF	2
(CACACC)n	Simple_repeat	ITF	2
(CACACG)n	Simple_repeat	ITF	2
(CACATGCACA)n	Simple_repeat	ITF	2
(CACCAG)n	Simple_repeat	ITF	2
(CACG)n	Simple_repeat	ITF	2
(CACTC)n	Simple_repeat	ITF	2
(CAGCAT)n	Simple_repeat	ITF	2
(CAGGA)n	Simple_repeat	ITF	2
(CAGGACC)n	Simple_repeat	ITF	2
(CAGGG)n	Simple_repeat	ITF	2
(CATAG)n	Simple_repeat	ITF	2
(CATAGA)n	Simple_repeat	ITF	2
(CATCT)n	Simple_repeat	ITF	2
(CCAC)n	Simple_repeat	ITF	2
(CCACT)n	Simple_repeat	ITF	2
(CCAGC)n	Simple_repeat	ITF	2
(CCATCA)n	Simple_repeat	ITF	2
(CCCACAC)n	Simple_repeat	ITF	2
(CCCCCAC)n	Simple_repeat	ITF	2
(CCCCG)n	Simple_repeat	ITF	2
(CCCG)n	Simple_repeat	ITF	2
(CCCTGT)n	Simple_repeat	ITF	2
(CCGCACG)n	Simple_repeat	ITF	2
(CCGCCA)n	Simple_repeat	ITF	2
(CCGCG)n	Simple_repeat	ITF	2
(CCGCGG)n	Simple_repeat	ITF	2
(CCGGAG)n	Simple_repeat	ITF	2
(CCGGCC)n	Simple_repeat	ITF	2
(CCTCAG)n	Simple_repeat	ITF	2
(CCTCCC)n	Simple_repeat	ITF	2
(CCTCCG)n	Simple_repeat	ITF	2
(CCTCCTT)n	Simple_repeat	ITF	2
(CCTCTCC)n	Simple_repeat	ITF	2
(CCTCTCCT)n	Simple_repeat	ITF	2
(CCTGCA)n	Simple_repeat	ITF	2
(CCTGGA)n	Simple_repeat	ITF	2
(CGCA)n	Simple_repeat	ITF	2
(CGCCCT)n	Simple_repeat	ITF	2
(CGCCTG)n	Simple_repeat	ITF	2
(CGGA)n	Simple_repeat	ITF	2
(CTAATTT)n	Simple_repeat	ITF	2
(CTACTG)n	Simple_repeat	ITF	2
(CTATAT)n	Simple_repeat	ITF	2
(CTCACA)n	Simple_repeat	ITF	2
(CTCCAC)n	Simple_repeat	ITF	2
(CTCCAG)n	Simple_repeat	ITF	2
(CTCCAT)n	Simple_repeat	ITF	2
(CTCCTCC)n	Simple_repeat	ITF	2
(CTCGC)n	Simple_repeat	ITF	2
(CTCTAA)n	Simple_repeat	ITF	2
(CTCTCCT)n	Simple_repeat	ITF	2
(CTCTTCC)n	Simple_repeat	ITF	2
(CTCTTTA)n	Simple_repeat	ITF	2
(CTCTTTC)n	Simple_repeat	ITF	2
(CTCTTTG)n	Simple_repeat	ITF	2
(CTCTTTT)n	Simple_repeat	ITF	2
(CTGCTTT)n	Simple_repeat	ITF	2
(CTGGTA)n	Simple_repeat	ITF	2
(CTGTAT)n	Simple_repeat	ITF	2
(CTGTCC)n	Simple_repeat	ITF	2
(CTGTCG)n	Simple_repeat	ITF	2
(CTGTGAA)n	Simple_repeat	ITF	2
(CTGTTG)n	Simple_repeat	ITF	2
(CTTAATA)n	Simple_repeat	ITF	2
(CTTAC)n	Simple_repeat	ITF	2
(CTTCCC)n	Simple_repeat	ITF	2
(CTTCTCA)n	Simple_repeat	ITF	2
(CTTG)n	Simple_repeat	ITF	2
(CTTTG)n	Simple_repeat	ITF	2
(CTTTTG)n	Simple_repeat	ITF	2
(GAGAGG)n	Simple_repeat	ITF	2
(GAGGCCA)n	Simple_repeat	ITF	2
(GATGGA)n	Simple_repeat	ITF	2
(GCAGA)n	Simple_repeat	ITF	2
(GCAGAG)n	Simple_repeat	ITF	2
(GCAGCC)n	Simple_repeat	ITF	2
(GCAGCCC)n	Simple_repeat	ITF	2
(GCCA)n	Simple_repeat	ITF	2
(GCCAGA)n	Simple_repeat	ITF	2
(GCCCAT)n	Simple_repeat	ITF	2
(GCCCGC)n	Simple_repeat	ITF	2
(GCCCTG)n	Simple_repeat	ITF	2
(GCCCTGG)n	Simple_repeat	ITF	2
(GCCTCT)n	Simple_repeat	ITF	2
(GCCTG)n	Simple_repeat	ITF	2
(GCCTGA)n	Simple_repeat	ITF	2
(GCGGC)n	Simple_repeat	ITF	2
(GCTA)n	Simple_repeat	ITF	2
(GCTG)n	Simple_repeat	ITF	2
(GCTGA)n	Simple_repeat	ITF	2
(GGAAGAT)n	Simple_repeat	ITF	2
(GGAGGC)n	Simple_repeat	ITF	2
(GGCAGGT)n	Simple_repeat	ITF	2
(GGCCCT)n	Simple_repeat	ITF	2
(GGCCGT)n	Simple_repeat	ITF	2
(GGCGGC)n	Simple_repeat	ITF	2
(GGGAG)n	Simple_repeat	ITF	2
(GGGCA)n	Simple_repeat	ITF	2
(GTACAAAGTT)n	Simple_repeat	ITF	2
(GTCTGC)n	Simple_repeat	ITF	2
(GTCTTTT)n	Simple_repeat	ITF	2
(GTGATG)n	Simple_repeat	ITF	2
(GTGGAG)n	Simple_repeat	ITF	2
(GTGGCA)n	Simple_repeat	ITF	2
(GTTTAT)n	Simple_repeat	ITF	2
(GTTTCT)n	Simple_repeat	ITF	2
(GTTTTG)n	Simple_repeat	ITF	2
(TAATGA)n	Simple_repeat	ITF	2
(TAATGAA)n	Simple_repeat	ITF	2
(TAATTC)n	Simple_repeat	ITF	2
(TACCTA)n	Simple_repeat	ITF	2
(TACT)n	Simple_repeat	ITF	2
(TATCA)n	Simple_repeat	ITF	2
(TATCATT)n	Simple_repeat	ITF	2
(TATCTTC)n	Simple_repeat	ITF	2
(TATGAA)n	Simple_repeat	ITF	2
(TATTACA)n	Simple_repeat	ITF	2
(TATTATT)n	Simple_repeat	ITF	2
(TCACCA)n	Simple_repeat	ITF	2
(TCATCCC)n	Simple_repeat	ITF	2
(TCATG)n	Simple_repeat	ITF	2
(TCCATA)n	Simple_repeat	ITF	2
(TCCCCC)n	Simple_repeat	ITF	2
(TCCCCT)n	Simple_repeat	ITF	2
(TCCTTC)n	Simple_repeat	ITF	2
(TCGTCA)n	Simple_repeat	ITF	2
(TCTAT)n	Simple_repeat	ITF	2
(TCTATA)n	Simple_repeat	ITF	2
(TCTATC)n	Simple_repeat	ITF	2
(TCTATCT)n	Simple_repeat	ITF	2
(TCTCCAG)n	Simple_repeat	ITF	2
(TCTCCTG)n	Simple_repeat	ITF	2
(TCTCCTT)n	Simple_repeat	ITF	2
(TCTCTCC)n	Simple_repeat	ITF	2
(TCTGTGT)n	Simple_repeat	ITF	2
(TCTTCAT)n	Simple_repeat	ITF	2
(TGAACA)n	Simple_repeat	ITF	2
(TGAATG)n	Simple_repeat	ITF	2
(TGAC)n	Simple_repeat	ITF	2
(TGACCTA)n	Simple_repeat	ITF	2
(TGAGCCC)n	Simple_repeat	ITF	2
(TGATTTC)n	Simple_repeat	ITF	2
(TGCG)n	Simple_repeat	ITF	2
(TGCT)n	Simple_repeat	ITF	2
(TGCTCC)n	Simple_repeat	ITF	2
(TGCTTC)n	Simple_repeat	ITF	2
(TGGAGAA)n	Simple_repeat	ITF	2
(TGGGC)n	Simple_repeat	ITF	2
(TGGGGC)n	Simple_repeat	ITF	2
(TGGTG)n	Simple_repeat	ITF	2
(TGGTGA)n	Simple_repeat	ITF	2
(TGTCCC)n	Simple_repeat	ITF	2
(TGTGAG)n	Simple_repeat	ITF	2
(TGTTAC)n	Simple_repeat	ITF	2
(TGTTCTC)n	Simple_repeat	ITF	2
(TGTTTTG)n	Simple_repeat	ITF	2
(TGTTTTTC)n	Simple_repeat	ITF	2
(TTAAA)n	Simple_repeat	ITF	2
(TTACATT)n	Simple_repeat	ITF	2
(TTACTTA)n	Simple_repeat	ITF	2
(TTCATA)n	Simple_repeat	ITF	2
(TTCATTA)n	Simple_repeat	ITF	2
(TTCTAGT)n	Simple_repeat	ITF	2
(TTCTCA)n	Simple_repeat	ITF	2
(TTCTCCC)n	Simple_repeat	ITF	2
(TTCTGCT)n	Simple_repeat	ITF	2
(TTCTTAA)n	Simple_repeat	ITF	2
(TTCTTTC)n	Simple_repeat	ITF	2
(TTGCCT)n	Simple_repeat	ITF	2
(TTGCTT)n	Simple_repeat	ITF	2
(TTGTTC)n	Simple_repeat	ITF	2
(TTGTTTC)n	Simple_repeat	ITF	2
(TTTAAG)n	Simple_repeat	ITF	2
(TTTAGAT)n	Simple_repeat	ITF	2
(TTTCTAA)n	Simple_repeat	ITF	2
(TTTCTGC)n	Simple_repeat	ITF	2
(TTTGCT)n	Simple_repeat	ITF	2
(TTTGTTA)n	Simple_repeat	ITF	2
(TTTTAG)n	Simple_repeat	ITF	2
(TTTTCCT)n	Simple_repeat	ITF	2
Eulor12	DNA?	ITF	2
Eulor3	DNA?	ITF	2
hAT-16_Crp	DNA	ITF	2
HERV1_LTRa	LTR	ITF	2
HY5	scRNA	ITF	2
LTR108b_Mam	LTR	ITF	2
LTR10B	LTR	ITF	2
LTR1C	LTR	ITF	2
LTR22	LTR	ITF	2
LTR58	LTR	ITF	2
MARE9	Unknown	ITF	2
MER132	DNA	ITF	2
MER92D	LTR	ITF	2
tRNA-Gln-CAA	tRNA	ITF	2
tRNA-Leu-CTA_	tRNA	ITF	2
tRNA-Met-i	tRNA	ITF	2
tRNA-Met_	tRNA	ITF	2
tRNA-Phe-TTY	tRNA	ITF	2
tRNA-Thr-ACG_	tRNA	ITF	2
tRNA-Val-GTG	tRNA	ITF	2
U1	snRNA	ITF	2
UCON51	LTR?	ITF	2
UCON57	Unknown	ITF	2
UCON62	DNA?	ITF	2
UCON64	Unknown	ITF	2
(AAAAAG)n	Simple_repeat	AZA	1
(AAAAAT)n	Simple_repeat	AZA	1
(AAAATA)n	Simple_repeat	AZA	1
(AAACT)n	Simple_repeat	AZA	1
(AAAGAG)n	Simple_repeat	AZA	1
(AAAGGA)n	Simple_repeat	AZA	1
(AAAGGGG)n	Simple_repeat	AZA	1
(AAATAT)n	Simple_repeat	AZA	1
(AACAAA)n	Simple_repeat	AZA	1
(AACAACA)n	Simple_repeat	AZA	1
(AACAAG)n	Simple_repeat	AZA	1
(AACACA)n	Simple_repeat	AZA	1
(AACAGAA)n	Simple_repeat	AZA	1
(AACAT)n	Simple_repeat	AZA	1
(AACCTC)n	Simple_repeat	AZA	1
(AACTAA)n	Simple_repeat	AZA	1
(AACTAG)n	Simple_repeat	AZA	1
(AACTCCC)n	Simple_repeat	AZA	1
(AACTCTC)n	Simple_repeat	AZA	1
(AAGAAA)n	Simple_repeat	AZA	1
(AAGAAGG)n	Simple_repeat	AZA	1
(AAGAATG)n	Simple_repeat	AZA	1
(AAGACAA)n	Simple_repeat	AZA	1
(AAGACAG)n	Simple_repeat	AZA	1
(AAGAGG)n	Simple_repeat	AZA	1
(AAGAGGC)n	Simple_repeat	AZA	1
(AAGATG)n	Simple_repeat	AZA	1
(AAGATGA)n	Simple_repeat	AZA	1
(AAGATT)n	Simple_repeat	AZA	1
(AAGATTA)n	Simple_repeat	AZA	1
(AAGCA)n	Simple_repeat	AZA	1
(AAGCCA)n	Simple_repeat	AZA	1
(AAGGC)n	Simple_repeat	AZA	1
(AAGGG)n	Simple_repeat	AZA	1
(AAGGTAG)n	Simple_repeat	AZA	1
(AAGT)n	Simple_repeat	AZA	1
(AAGTGAC)n	Simple_repeat	AZA	1
(AAGTGG)n	Simple_repeat	AZA	1
(AATAAA)n	Simple_repeat	AZA	1
(AATAAC)n	Simple_repeat	AZA	1
(AATAACA)n	Simple_repeat	AZA	1
(AATAAG)n	Simple_repeat	AZA	1
(AATAAGA)n	Simple_repeat	AZA	1
(AATAATA)n	Simple_repeat	AZA	1
(AATACA)n	Simple_repeat	AZA	1
(AATACAC)n	Simple_repeat	AZA	1
(AATACAT)n	Simple_repeat	AZA	1
(AATACT)n	Simple_repeat	AZA	1
(AATAGAA)n	Simple_repeat	AZA	1
(AATAGAT)n	Simple_repeat	AZA	1
(AATAGC)n	Simple_repeat	AZA	1
(AATAGG)n	Simple_repeat	AZA	1
(AATAT)n	Simple_repeat	AZA	1
(AATATA)n	Simple_repeat	AZA	1
(AATATAA)n	Simple_repeat	AZA	1
(AATATAT)n	Simple_repeat	AZA	1
(AATATC)n	Simple_repeat	AZA	1
(AATATGA)n	Simple_repeat	AZA	1
(AATATGT)n	Simple_repeat	AZA	1
(AATATTA)n	Simple_repeat	AZA	1
(AATATTT)n	Simple_repeat	AZA	1
(AATCAA)n	Simple_repeat	AZA	1
(AATCACT)n	Simple_repeat	AZA	1
(AATCAT)n	Simple_repeat	AZA	1
(AATCCAG)n	Simple_repeat	AZA	1
(AATCTTT)n	Simple_repeat	AZA	1
(AATGAGA)n	Simple_repeat	AZA	1
(AATGATA)n	Simple_repeat	AZA	1
(AATGGAA)n	Simple_repeat	AZA	1
(AATGGTA)n	Simple_repeat	AZA	1
(AATGTAA)n	Simple_repeat	AZA	1
(AATGTT)n	Simple_repeat	AZA	1
(AATTA)n	Simple_repeat	AZA	1
(AATTAAC)n	Simple_repeat	AZA	1
(AATTAAT)n	Simple_repeat	AZA	1
(AATTAC)n	Simple_repeat	AZA	1
(AATTACAA)n	Simple_repeat	AZA	1
(AATTATA)n	Simple_repeat	AZA	1
(AATTATC)n	Simple_repeat	AZA	1
(AATTCA)n	Simple_repeat	AZA	1
(AATTCAA)n	Simple_repeat	AZA	1
(AATTCC)n	Simple_repeat	AZA	1
(AATTCT)n	Simple_repeat	AZA	1
(AATTCTTA)n	Simple_repeat	AZA	1
(AATTTAA)n	Simple_repeat	AZA	1
(AATTTC)n	Simple_repeat	AZA	1
(AATTTCT)n	Simple_repeat	AZA	1
(AATTTGA)n	Simple_repeat	AZA	1
(AATTTTG)n	Simple_repeat	AZA	1
(ACAAAA)n	Simple_repeat	AZA	1
(ACAAAC)n	Simple_repeat	AZA	1
(ACAAGAA)n	Simple_repeat	AZA	1
(ACAAT)n	Simple_repeat	AZA	1
(ACACAA)n	Simple_repeat	AZA	1
(ACACC)n	Simple_repeat	AZA	1
(ACAGCA)n	Simple_repeat	AZA	1
(ACAGGA)n	Simple_repeat	AZA	1
(ACAGGC)n	Simple_repeat	AZA	1
(ACAGTT)n	Simple_repeat	AZA	1
(ACATACAC)n	Simple_repeat	AZA	1
(ACATTT)n	Simple_repeat	AZA	1
(ACCACC)n	Simple_repeat	AZA	1
(ACCCC)n	Simple_repeat	AZA	1
(ACCCTA)n	Simple_repeat	AZA	1
(ACCCTCC)n	Simple_repeat	AZA	1
(ACCTCC)n	Simple_repeat	AZA	1
(ACCTGG)n	Simple_repeat	AZA	1
(ACT)n	Simple_repeat	AZA	1
(ACTA)n	Simple_repeat	AZA	1
(ACTAA)n	Simple_repeat	AZA	1
(ACTAAT)n	Simple_repeat	AZA	1
(ACTCAC)n	Simple_repeat	AZA	1
(ACTG)n	Simple_repeat	AZA	1
(ACTGGT)n	Simple_repeat	AZA	1
(ACTTCG)n	Simple_repeat	AZA	1
(ACTTTTA)n	Simple_repeat	AZA	1
(AGAAA)n	Simple_repeat	AZA	1
(AGAAAA)n	Simple_repeat	AZA	1
(AGAAGC)n	Simple_repeat	AZA	1
(AGAATAA)n	Simple_repeat	AZA	1
(AGAATAT)n	Simple_repeat	AZA	1
(AGACAC)n	Simple_repeat	AZA	1
(AGAGAGAC)n	Simple_repeat	AZA	1
(AGAGAGC)n	Simple_repeat	AZA	1
(AGAGAT)n	Simple_repeat	AZA	1
(AGAGCC)n	Simple_repeat	AZA	1
(AGAGGTC)n	Simple_repeat	AZA	1
(AGAGTAC)n	Simple_repeat	AZA	1
(AGATAG)n	Simple_repeat	AZA	1
(AGATC)n	Simple_repeat	AZA	1
(AGATGAG)n	Simple_repeat	AZA	1
(AGATGGAT)n	Simple_repeat	AZA	1
(AGATGT)n	Simple_repeat	AZA	1
(AGCA)n	Simple_repeat	AZA	1
(AGCAAC)n	Simple_repeat	AZA	1
(AGCAAGC)n	Simple_repeat	AZA	1
(AGCACC)n	Simple_repeat	AZA	1
(AGCACCC)n	Simple_repeat	AZA	1
(AGCCTGC)n	Simple_repeat	AZA	1
(AGCTCC)n	Simple_repeat	AZA	1
(AGCTG)n	Simple_repeat	AZA	1
(AGGAC)n	Simple_repeat	AZA	1
(AGGAGTG)n	Simple_repeat	AZA	1
(AGGCAGC)n	Simple_repeat	AZA	1
(AGGCTGG)n	Simple_repeat	AZA	1
(AGGGG)n	Simple_repeat	AZA	1
(AGGTGC)n	Simple_repeat	AZA	1
(AGTAT)n	Simple_repeat	AZA	1
(AGTC)n	Simple_repeat	AZA	1
(AGTGAAC)n	Simple_repeat	AZA	1
(AGTGTG)n	Simple_repeat	AZA	1
(ATAAC)n	Simple_repeat	AZA	1
(ATAACA)n	Simple_repeat	AZA	1
(ATAAGG)n	Simple_repeat	AZA	1
(ATAAGGA)n	Simple_repeat	AZA	1
(ATAATAA)n	Simple_repeat	AZA	1
(ATAATAC)n	Simple_repeat	AZA	1
(ATAATCT)n	Simple_repeat	AZA	1
(ATAATG)n	Simple_repeat	AZA	1
(ATAATGA)n	Simple_repeat	AZA	1
(ATAATT)n	Simple_repeat	AZA	1
(ATAATTA)n	Simple_repeat	AZA	1
(ATAATTG)n	Simple_repeat	AZA	1
(ATACAAT)n	Simple_repeat	AZA	1
(ATACACA)n	Simple_repeat	AZA	1
(ATACACAC)n	Simple_repeat	AZA	1
(ATACACACAC)n	Simple_repeat	AZA	1
(ATACAT)n	Simple_repeat	AZA	1
(ATACC)n	Simple_repeat	AZA	1
(ATACT)n	Simple_repeat	AZA	1
(ATACTA)n	Simple_repeat	AZA	1
(ATACTTT)n	Simple_repeat	AZA	1
(ATAGA)n	Simple_repeat	AZA	1
(ATAGTC)n	Simple_repeat	AZA	1
(ATATAAT)n	Simple_repeat	AZA	1
(ATATATA)n	Simple_repeat	AZA	1
(ATATATG)n	Simple_repeat	AZA	1
(ATATATT)n	Simple_repeat	AZA	1
(ATATATTC)n	Simple_repeat	AZA	1
(ATATATTT)n	Simple_repeat	AZA	1
(ATATCAC)n	Simple_repeat	AZA	1
(ATATG)n	Simple_repeat	AZA	1
(ATATGA)n	Simple_repeat	AZA	1
(ATATGAT)n	Simple_repeat	AZA	1
(ATATTAA)n	Simple_repeat	AZA	1
(ATATTAT)n	Simple_repeat	AZA	1
(ATATTG)n	Simple_repeat	AZA	1
(ATATTTT)n	Simple_repeat	AZA	1
(ATCACT)n	Simple_repeat	AZA	1
(ATCAGA)n	Simple_repeat	AZA	1
(ATCAT)n	Simple_repeat	AZA	1
(ATCATA)n	Simple_repeat	AZA	1
(ATCATC)n	Simple_repeat	AZA	1
(ATCATT)n	Simple_repeat	AZA	1
(ATCCTC)n	Simple_repeat	AZA	1
(ATCCTCC)n	Simple_repeat	AZA	1
(ATCTAC)n	Simple_repeat	AZA	1
(ATCTCT)n	Simple_repeat	AZA	1
(ATCTGATTAA)n	Simple_repeat	AZA	1
(ATCTTTA)n	Simple_repeat	AZA	1
(ATGAA)n	Simple_repeat	AZA	1
(ATGAAC)n	Simple_repeat	AZA	1
(ATGAATA)n	Simple_repeat	AZA	1
(ATGAG)n	Simple_repeat	AZA	1
(ATGAGG)n	Simple_repeat	AZA	1
(ATGATT)n	Simple_repeat	AZA	1
(ATGC)n	Simple_repeat	AZA	1
(ATGCAA)n	Simple_repeat	AZA	1
(ATGCAG)n	Simple_repeat	AZA	1
(ATGGAAG)n	Simple_repeat	AZA	1
(ATGGAG)n	Simple_repeat	AZA	1
(ATGGAGT)n	Simple_repeat	AZA	1
(ATGTAA)n	Simple_repeat	AZA	1
(ATGTATA)n	Simple_repeat	AZA	1
(ATGTATAC)n	Simple_repeat	AZA	1
(ATGTTT)n	Simple_repeat	AZA	1
(ATGTTTT)n	Simple_repeat	AZA	1
(ATTAA)n	Simple_repeat	AZA	1
(ATTAAT)n	Simple_repeat	AZA	1
(ATTAC)n	Simple_repeat	AZA	1
(ATTACT)n	Simple_repeat	AZA	1
(ATTAGAA)n	Simple_repeat	AZA	1
(ATTAGAG)n	Simple_repeat	AZA	1
(ATTAGAT)n	Simple_repeat	AZA	1
(ATTAGT)n	Simple_repeat	AZA	1
(ATTATAT)n	Simple_repeat	AZA	1
(ATTCCC)n	Simple_repeat	AZA	1
(ATTCT)n	Simple_repeat	AZA	1
(ATTCTC)n	Simple_repeat	AZA	1
(ATTCTT)n	Simple_repeat	AZA	1
(ATTCTTA)n	Simple_repeat	AZA	1
(ATTGC)n	Simple_repeat	AZA	1
(ATTTAAT)n	Simple_repeat	AZA	1
(ATTTACT)n	Simple_repeat	AZA	1
(ATTTAG)n	Simple_repeat	AZA	1
(ATTTAGA)n	Simple_repeat	AZA	1
(ATTTCAA)n	Simple_repeat	AZA	1
(ATTTCTT)n	Simple_repeat	AZA	1
(ATTTGC)n	Simple_repeat	AZA	1
(ATTTGTA)n	Simple_repeat	AZA	1
(ATTTTCA)n	Simple_repeat	AZA	1
(ATTTTGT)n	Simple_repeat	AZA	1
(ATTTTTA)n	Simple_repeat	AZA	1
(ATTTTTG)n	Simple_repeat	AZA	1
(CAAAC)n	Simple_repeat	AZA	1
(CAACA)n	Simple_repeat	AZA	1
(CAACCC)n	Simple_repeat	AZA	1
(CAATC)n	Simple_repeat	AZA	1
(CAATGTG)n	Simple_repeat	AZA	1
(CACAA)n	Simple_repeat	AZA	1
(CACAACA)n	Simple_repeat	AZA	1
(CACACAC)n	Simple_repeat	AZA	1
(CACACAG)n	Simple_repeat	AZA	1
(CACACC)n	Simple_repeat	AZA	1
(CACAGC)n	Simple_repeat	AZA	1
(CACATGCACA)n	Simple_repeat	AZA	1
(CACCAT)n	Simple_repeat	AZA	1
(CACCGC)n	Simple_repeat	AZA	1
(CACCTC)n	Simple_repeat	AZA	1
(CACCTGA)n	Simple_repeat	AZA	1
(CAGAAT)n	Simple_repeat	AZA	1
(CAGACC)n	Simple_repeat	AZA	1
(CAGAGTT)n	Simple_repeat	AZA	1
(CAGATA)n	Simple_repeat	AZA	1
(CAGCAC)n	Simple_repeat	AZA	1
(CAGCACA)n	Simple_repeat	AZA	1
(CAGCAG)n	Simple_repeat	AZA	1
(CAGCCC)n	Simple_repeat	AZA	1
(CAGCCCC)n	Simple_repeat	AZA	1
(CAGCCCT)n	Simple_repeat	AZA	1
(CAGGG)n	Simple_repeat	AZA	1
(CAGT)n	Simple_repeat	AZA	1
(CAGTAA)n	Simple_repeat	AZA	1
(CAGTCA)n	Simple_repeat	AZA	1
(CAGTCC)n	Simple_repeat	AZA	1
(CATAAT)n	Simple_repeat	AZA	1
(CATAATA)n	Simple_repeat	AZA	1
(CATAGA)n	Simple_repeat	AZA	1
(CATCAT)n	Simple_repeat	AZA	1
(CATCCA)n	Simple_repeat	AZA	1
(CATCCC)n	Simple_repeat	AZA	1
(CATCCT)n	Simple_repeat	AZA	1
(CATCTG)n	Simple_repeat	AZA	1
(CATCTTT)n	Simple_repeat	AZA	1
(CATTA)n	Simple_repeat	AZA	1
(CATTATA)n	Simple_repeat	AZA	1
(CATTATC)n	Simple_repeat	AZA	1
(CATTC)n.Simple_repeat	Simple_repeat	AZA	1
(CATTCT)n	Simple_repeat	AZA	1
(CATTCTT)n	Simple_repeat	AZA	1
(CCAC)n	Simple_repeat	AZA	1
(CCACCA)n	Simple_repeat	AZA	1
(CCACCT)n	Simple_repeat	AZA	1
(CCACGG)n	Simple_repeat	AZA	1
(CCACTG)n	Simple_repeat	AZA	1
(CCAG)n	Simple_repeat	AZA	1
(CCAGAA)n	Simple_repeat	AZA	1
(CCAGAG)n	Simple_repeat	AZA	1
(CCAGC)n	Simple_repeat	AZA	1
(CCAGGCC)n	Simple_repeat	AZA	1
(CCAGTA)n	Simple_repeat	AZA	1
(CCATATT)n	Simple_repeat	AZA	1
(CCATCA)n	Simple_repeat	AZA	1
(CCATCC)n	Simple_repeat	AZA	1
(CCATCT)n	Simple_repeat	AZA	1
(CCATT)n	Simple_repeat	AZA	1
(CCATTT)n	Simple_repeat	AZA	1
(CCCACA)n	Simple_repeat	AZA	1
(CCCACC)n	Simple_repeat	AZA	1
(CCCACCA)n	Simple_repeat	AZA	1
(CCCACCT)n	Simple_repeat	AZA	1
(CCCACT)n	Simple_repeat	AZA	1
(CCCAG)n	Simple_repeat	AZA	1
(CCCATG)n	Simple_repeat	AZA	1
(CCCCAGG)n	Simple_repeat	AZA	1
(CCCCCCG)n	Simple_repeat	AZA	1
(CCCCCG)n	Simple_repeat	AZA	1
(CCCCCGC)n	Simple_repeat	AZA	1
(CCCCCT)n	Simple_repeat	AZA	1
(CCCCGG)n	Simple_repeat	AZA	1
(CCCGC)n	Simple_repeat	AZA	1
(CCCGG)n	Simple_repeat	AZA	1
(CCCGGC)n	Simple_repeat	AZA	1
(CCCGGCG)n	Simple_repeat	AZA	1
(CCCGT)n	Simple_repeat	AZA	1
(CCCTCAG)n	Simple_repeat	AZA	1
(CCCTCC)n	Simple_repeat	AZA	1
(CCCTCTG)n	Simple_repeat	AZA	1
(CCCTCTT)n	Simple_repeat	AZA	1
(CCCTGC)n	Simple_repeat	AZA	1
(CCCTTC)n	Simple_repeat	AZA	1
(CCCTTCC)n	Simple_repeat	AZA	1
(CCCTTT)n	Simple_repeat	AZA	1
(CCGCAG)n	Simple_repeat	AZA	1
(CCGCCA)n	Simple_repeat	AZA	1
(CCGCCCC)n	Simple_repeat	AZA	1
(CCGCCG)n	Simple_repeat	AZA	1
(CCGCGC)n	Simple_repeat	AZA	1
(CCGCGG)n	Simple_repeat	AZA	1
(CCGGC)n	Simple_repeat	AZA	1
(CCGGCC)n	Simple_repeat	AZA	1
(CCTACA)n	Simple_repeat	AZA	1
(CCTCA)n	Simple_repeat	AZA	1
(CCTCACT)n	Simple_repeat	AZA	1
(CCTCCC)n	Simple_repeat	AZA	1
(CCTCCCA)n	Simple_repeat	AZA	1
(CCTCCCT)n	Simple_repeat	AZA	1
(CCTCCT)n	Simple_repeat	AZA	1
(CCTCCTT)n	Simple_repeat	AZA	1
(CCTCGC)n	Simple_repeat	AZA	1
(CCTCGG)n	Simple_repeat	AZA	1
(CCTCT)n	Simple_repeat	AZA	1
(CCTCTC)n	Simple_repeat	AZA	1
(CCTCTTC)n	Simple_repeat	AZA	1
(CCTCTTT)n	Simple_repeat	AZA	1
(CCTGACT)n	Simple_repeat	AZA	1
(CCTGCCT)n	Simple_repeat	AZA	1
(CCTGCGC)n	Simple_repeat	AZA	1
(CCTGGC)n	Simple_repeat	AZA	1
(CCTGT)n	Simple_repeat	AZA	1
(CCTGTT)n	Simple_repeat	AZA	1
(CCTTACA)n	Simple_repeat	AZA	1
(CCTTCA)n	Simple_repeat	AZA	1
(CCTTCC)n	Simple_repeat	AZA	1
(CCTTCCC)n	Simple_repeat	AZA	1
(CCTTCTC)n	Simple_repeat	AZA	1
(CCTTTCC)n	Simple_repeat	AZA	1
(CCTTTCTG)n	Simple_repeat	AZA	1
(CCTTTT)n	Simple_repeat	AZA	1
(CCTTTTA)n	Simple_repeat	AZA	1
(CG)n	Simple_repeat	AZA	1
(CGA)n	Simple_repeat	AZA	1
(CGAGG)n	Simple_repeat	AZA	1
(CGAGGA)n	Simple_repeat	AZA	1
(CGCAGG)n	Simple_repeat	AZA	1
(CGCCCCC)n	Simple_repeat	AZA	1
(CGCCCG)n	Simple_repeat	AZA	1
(CGCCCGC)n	Simple_repeat	AZA	1
(CGCCCGG)n	Simple_repeat	AZA	1
(CGCCCT)n	Simple_repeat	AZA	1
(CGCCGC)n	Simple_repeat	AZA	1
(CGCCGG)n	Simple_repeat	AZA	1
(CGCGGC)n	Simple_repeat	AZA	1
(CGG)n	Simple_repeat	AZA	1
(CGGA)n	Simple_repeat	AZA	1
(CGGAGG)n	Simple_repeat	AZA	1
(CGGCCC)n	Simple_repeat	AZA	1
(CGGTC)n	Simple_repeat	AZA	1
(CGTGTGG)n	Simple_repeat	AZA	1
(CTA)n	Simple_repeat	AZA	1
(CTAA)n	Simple_repeat	AZA	1
(CTACCC)n	Simple_repeat	AZA	1
(CTACT)n	Simple_repeat	AZA	1
(CTACTA)n	Simple_repeat	AZA	1
(CTACTG)n	Simple_repeat	AZA	1
(CTATTT)n	Simple_repeat	AZA	1
(CTATTTT)n	Simple_repeat	AZA	1
(CTCA)n	Simple_repeat	AZA	1
(CTCAAGA)n	Simple_repeat	AZA	1
(CTCACA)n	Simple_repeat	AZA	1
(CTCACT)n	Simple_repeat	AZA	1
(CTCACTT)n	Simple_repeat	AZA	1
(CTCAGC)n	Simple_repeat	AZA	1
(CTCAGG)n	Simple_repeat	AZA	1
(CTCCAC)n	Simple_repeat	AZA	1
(CTCCACT)n	Simple_repeat	AZA	1
(CTCCAGG)n	Simple_repeat	AZA	1
(CTCCAT)n	Simple_repeat	AZA	1
(CTCCATT)n	Simple_repeat	AZA	1
(CTCCCA)n	Simple_repeat	AZA	1
(CTCCCAC)n	Simple_repeat	AZA	1
(CTCCCCA)n	Simple_repeat	AZA	1
(CTCCCT)n	Simple_repeat	AZA	1
(CTCCTCC)n	Simple_repeat	AZA	1
(CTCCTGC)n	Simple_repeat	AZA	1
(CTCCTTC)n	Simple_repeat	AZA	1
(CTCGGC)n	Simple_repeat	AZA	1
(CTCTAT)n	Simple_repeat	AZA	1
(CTCTCA)n	Simple_repeat	AZA	1
(CTCTCCT)n	Simple_repeat	AZA	1
(CTCTG)n	Simple_repeat	AZA	1
(CTCTGAC)n	Simple_repeat	AZA	1
(CTCTGG)n	Simple_repeat	AZA	1
(CTCTTTA)n	Simple_repeat	AZA	1
(CTGAGG)n	Simple_repeat	AZA	1
(CTGATT)n	Simple_repeat	AZA	1
(CTGCAC)n	Simple_repeat	AZA	1
(CTGCAG)n	Simple_repeat	AZA	1
(CTGCCA)n	Simple_repeat	AZA	1
(CTGCCCT)n	Simple_repeat	AZA	1
(CTGCCT)n	Simple_repeat	AZA	1
(CTGCCTCT)n	Simple_repeat	AZA	1
(CTGCGG)n	Simple_repeat	AZA	1
(CTGCTC)n	Simple_repeat	AZA	1
(CTGCTCC)n	Simple_repeat	AZA	1
(CTGCTTT)n	Simple_repeat	AZA	1
(CTGGCAG)n	Simple_repeat	AZA	1
(CTGGTA)n	Simple_repeat	AZA	1
(CTGGTCA)n	Simple_repeat	AZA	1
(CTGGTG)n	Simple_repeat	AZA	1
(CTGTC)n	Simple_repeat	AZA	1
(CTGTCTCT)n	Simple_repeat	AZA	1
(CTGTCTG)n	Simple_repeat	AZA	1
(CTGTGAA)n	Simple_repeat	AZA	1
(CTGTTTT)n	Simple_repeat	AZA	1
(CTTAC)n	Simple_repeat	AZA	1
(CTTACCT)n	Simple_repeat	AZA	1
(CTTCCA)n	Simple_repeat	AZA	1
(CTTCCAC)n	Simple_repeat	AZA	1
(CTTCCT)n	Simple_repeat	AZA	1
(CTTCCTT)n	Simple_repeat	AZA	1
(CTTCGT)n	Simple_repeat	AZA	1
(CTTCTA)n	Simple_repeat	AZA	1
(CTTCTCA)n	Simple_repeat	AZA	1
(CTTGCT)n	Simple_repeat	AZA	1
(CTTGCTT)n	Simple_repeat	AZA	1
(CTTGT)n	Simple_repeat	AZA	1
(CTTTATA)n	Simple_repeat	AZA	1
(CTTTCAT)n	Simple_repeat	AZA	1
(CTTTCTC)n	Simple_repeat	AZA	1
(CTTTG)n	Simple_repeat	AZA	1
(CTTTGT)n	Simple_repeat	AZA	1
(CTTTTA)n	Simple_repeat	AZA	1
(CTTTTCA)n	Simple_repeat	AZA	1
(CTTTTCT)n	Simple_repeat	AZA	1
(GAAAT)n	Simple_repeat	AZA	1
(GAAC)n	Simple_repeat	AZA	1
(GAAGAT)n	Simple_repeat	AZA	1
(GAAGCA)n	Simple_repeat	AZA	1
(GAAGG)n	Simple_repeat	AZA	1
(GAATA)n	Simple_repeat	AZA	1
(GAATGA)n	Simple_repeat	AZA	1
(GAATGGA)n	Simple_repeat	AZA	1
(GAATGTT)n	Simple_repeat	AZA	1
(GAATTAA)n	Simple_repeat	AZA	1
(GAATTTA)n	Simple_repeat	AZA	1
(GACAGA)n	Simple_repeat	AZA	1
(GACAGG)n	Simple_repeat	AZA	1
(GACAGT)n	Simple_repeat	AZA	1
(GACCCCC)n	Simple_repeat	AZA	1
(GACG)n	Simple_repeat	AZA	1
(GAGA)n	Simple_repeat	AZA	1
(GAGAA)n	Simple_repeat	AZA	1
(GAGACA)n	Simple_repeat	AZA	1
(GAGAGCT)n	Simple_repeat	AZA	1
(GAGAGG)n	Simple_repeat	AZA	1
(GAGAT)n	Simple_repeat	AZA	1
(GAGC)n	Simple_repeat	AZA	1
(GAGCAAT)n	Simple_repeat	AZA	1
(GAGGCAG)n	Simple_repeat	AZA	1
(GAGGCG)n	Simple_repeat	AZA	1
(GAGGCTG)n	Simple_repeat	AZA	1
(GAGGTG)n	Simple_repeat	AZA	1
(GAGTGT)n	Simple_repeat	AZA	1
(GATAA)n	Simple_repeat	AZA	1
(GATATAA)n	Simple_repeat	AZA	1
(GATTC)n	Simple_repeat	AZA	1
(GATTTCT)n	Simple_repeat	AZA	1
(GATTTTT)n	Simple_repeat	AZA	1
(GCAAA)n	Simple_repeat	AZA	1
(GCACAC)n	Simple_repeat	AZA	1
(GCAG)n	Simple_repeat	AZA	1
(GCAGAA)n	Simple_repeat	AZA	1
(GCAGAGA)n	Simple_repeat	AZA	1
(GCAGCA)n	Simple_repeat	AZA	1
(GCAGCC)n	Simple_repeat	AZA	1
(GCAGCCA)n	Simple_repeat	AZA	1
(GCAGGCT)n	Simple_repeat	AZA	1
(GCAGTG)n	Simple_repeat	AZA	1
(GCATA)n	Simple_repeat	AZA	1
(GCATCA)n	Simple_repeat	AZA	1
(GCCA)n	Simple_repeat	AZA	1
(GCCAA)n	Simple_repeat	AZA	1
(GCCACA)n	Simple_repeat	AZA	1
(GCCACT)n	Simple_repeat	AZA	1
(GCCAGA)n	Simple_repeat	AZA	1
(GCCATA)n	Simple_repeat	AZA	1
(GCCC)n	Simple_repeat	AZA	1
(GCCCCCT)n	Simple_repeat	AZA	1
(GCCCCT)n	Simple_repeat	AZA	1
(GCCCTGG)n	Simple_repeat	AZA	1
(GCCGC)n	Simple_repeat	AZA	1
(GCCGCC)n	Simple_repeat	AZA	1
(GCCGCT)n	Simple_repeat	AZA	1
(GCCGG)n	Simple_repeat	AZA	1
(GCCGGA)n	Simple_repeat	AZA	1
(GCCTCA)n	Simple_repeat	AZA	1
(GCCTCC)n	Simple_repeat	AZA	1
(GCCTCT)n	Simple_repeat	AZA	1
(GCCTGA)n	Simple_repeat	AZA	1
(GCGA)n	Simple_repeat	AZA	1
(GCGCC)n	Simple_repeat	AZA	1
(GCGCGT)n	Simple_repeat	AZA	1
(GCGGCC)n	Simple_repeat	AZA	1
(GCGGCG)n	Simple_repeat	AZA	1
(GCGGCT)n	Simple_repeat	AZA	1
(GCGGG)n	Simple_repeat	AZA	1
(GCGT)n	Simple_repeat	AZA	1
(GCTA)n	Simple_repeat	AZA	1
(GCTCCC)n	Simple_repeat	AZA	1
(GCTCG)n	Simple_repeat	AZA	1
(GCTG)n	Simple_repeat	AZA	1
(GCTGAA)n	Simple_repeat	AZA	1
(GCTGCC)n	Simple_repeat	AZA	1
(GCTGCCG)n	Simple_repeat	AZA	1
(GCTGCG)n	Simple_repeat	AZA	1
(GCTGCT)n	Simple_repeat	AZA	1
(GCTGTG)n	Simple_repeat	AZA	1
(GGAAGG)n	Simple_repeat	AZA	1
(GGAAGT)n	Simple_repeat	AZA	1
(GGAATCT)n	Simple_repeat	AZA	1
(GGAC)n	Simple_repeat	AZA	1
(GGACCG)n	Simple_repeat	AZA	1
(GGAGAG)n	Simple_repeat	AZA	1
(GGAGAT)n	Simple_repeat	AZA	1
(GGAGCC)n	Simple_repeat	AZA	1
(GGAGCG)n	Simple_repeat	AZA	1
(GGAGG)n	Simple_repeat	AZA	1
(GGAGGC)n	Simple_repeat	AZA	1
(GGAGTA)n	Simple_repeat	AZA	1
(GGAGTGA)n	Simple_repeat	AZA	1
(GGAGTT)n	Simple_repeat	AZA	1
(GGATGG)n	Simple_repeat	AZA	1
(GGATTA)n	Simple_repeat	AZA	1
(GGCAA)n	Simple_repeat	AZA	1
(GGCACAG)n	Simple_repeat	AZA	1
(GGCAGA)n	Simple_repeat	AZA	1
(GGCAGC)n	Simple_repeat	AZA	1
(GGCAGGT)n	Simple_repeat	AZA	1
(GGCC)n	Simple_repeat	AZA	1
(GGCCAA)n	Simple_repeat	AZA	1
(GGCCAG)n	Simple_repeat	AZA	1
(GGCCAT)n	Simple_repeat	AZA	1
(GGCCC)n	Simple_repeat	AZA	1
(GGCCCA)n	Simple_repeat	AZA	1
(GGCCCCT)n	Simple_repeat	AZA	1
(GGCCG)n	Simple_repeat	AZA	1
(GGCCGG)n	Simple_repeat	AZA	1
(GGCCT)n	Simple_repeat	AZA	1
(GGCCTCT)n	Simple_repeat	AZA	1
(GGCGCT)n	Simple_repeat	AZA	1
(GGCGGA)n	Simple_repeat	AZA	1
(GGCTCA)n	Simple_repeat	AZA	1
(GGCTCCT)n	Simple_repeat	AZA	1
(GGCTGTG)n	Simple_repeat	AZA	1
(GGGAG)n	Simple_repeat	AZA	1
(GGGCA)n	Simple_repeat	AZA	1
(GGGGA)n	Simple_repeat	AZA	1
(GGGGT)n	Simple_repeat	AZA	1
(GGTCA)n	Simple_repeat	AZA	1
(GGTGGA)n	Simple_repeat	AZA	1
(GGTTTTT)n	Simple_repeat	AZA	1
(GTAATTT)n	Simple_repeat	AZA	1
(GTACAAAGTT)n	Simple_repeat	AZA	1
(GTACAT)n	Simple_repeat	AZA	1
(GTAG)n	Simple_repeat	AZA	1
(GTATAA)n	Simple_repeat	AZA	1
(GTATG)n	Simple_repeat	AZA	1
(GTATT)n	Simple_repeat	AZA	1
(GTATTT)n	Simple_repeat	AZA	1
(GTCA)n	Simple_repeat	AZA	1
(GTCAT)n	Simple_repeat	AZA	1
(GTCCC)n	Simple_repeat	AZA	1
(GTCCTT)n	Simple_repeat	AZA	1
(GTCTG)n	Simple_repeat	AZA	1
(GTCTGC)n	Simple_repeat	AZA	1
(GTCTGTA)n	Simple_repeat	AZA	1
(GTCTT)n	Simple_repeat	AZA	1
(GTCTTCT)n	Simple_repeat	AZA	1
(GTCTTTT)n	Simple_repeat	AZA	1
(GTGATG)n	Simple_repeat	AZA	1
(GTGGAG)n	Simple_repeat	AZA	1
(GTGGAGA)n	Simple_repeat	AZA	1
(GTGGCT)n	Simple_repeat	AZA	1
(GTGGTA)n	Simple_repeat	AZA	1
(GTGTCT)n	Simple_repeat	AZA	1
(GTGTG)n	Simple_repeat	AZA	1
(GTGTGC)n	Simple_repeat	AZA	1
(GTGTGGG)n	Simple_repeat	AZA	1
(GTGTGT)n	Simple_repeat	AZA	1
(GTGTT)n	Simple_repeat	AZA	1
(GTGTTTT)n	Simple_repeat	AZA	1
(GTTAAGT)n	Simple_repeat	AZA	1
(GTTAT)n	Simple_repeat	AZA	1
(GTTATT)n	Simple_repeat	AZA	1
(GTTCAT)n	Simple_repeat	AZA	1
(GTTCTT)n	Simple_repeat	AZA	1
(GTTGG)n	Simple_repeat	AZA	1
(GTTGT)n	Simple_repeat	AZA	1
(GTTGTT)n	Simple_repeat	AZA	1
(GTTTA)n	Simple_repeat	AZA	1
(GTTTAT)n	Simple_repeat	AZA	1
(GTTTCTG)n	Simple_repeat	AZA	1
(GTTTCTT)n	Simple_repeat	AZA	1
(GTTTTC)n	Simple_repeat	AZA	1
(TAACA)n	Simple_repeat	AZA	1
(TAACAA)n	Simple_repeat	AZA	1
(TAACAT)n	Simple_repeat	AZA	1
(TAACATA)n	Simple_repeat	AZA	1
(TAACT)n	Simple_repeat	AZA	1
(TAACTAA)n	Simple_repeat	AZA	1
(TAAG)n	Simple_repeat	AZA	1
(TAAGAAG)n	Simple_repeat	AZA	1
(TAAGAT)n	Simple_repeat	AZA	1
(TAATAA)n	Simple_repeat	AZA	1
(TAATAAT)n	Simple_repeat	AZA	1
(TAATACT)n	Simple_repeat	AZA	1
(TAATATA)n	Simple_repeat	AZA	1
(TAATATG)n	Simple_repeat	AZA	1
(TAATG)n	Simple_repeat	AZA	1
(TAATTA)n	Simple_repeat	AZA	1
(TAATTC)n	Simple_repeat	AZA	1
(TAATTCT)n	Simple_repeat	AZA	1
(TACAAT)n	Simple_repeat	AZA	1
(TACATG)n	Simple_repeat	AZA	1
(TACATT)n	Simple_repeat	AZA	1
(TACCTG)n	Simple_repeat	AZA	1
(TACT)n	Simple_repeat	AZA	1
(TACTAA)n	Simple_repeat	AZA	1
(TACTAT)n	Simple_repeat	AZA	1
(TACTATT)n	Simple_repeat	AZA	1
(TACTTAA)n	Simple_repeat	AZA	1
(TACTTAT)n	Simple_repeat	AZA	1
(TAGAA)n	Simple_repeat	AZA	1
(TAGAATA)n	Simple_repeat	AZA	1
(TAGATAT)n	Simple_repeat	AZA	1
(TAGATGA)n	Simple_repeat	AZA	1
(TAGGAAG)n	Simple_repeat	AZA	1
(TAGGTG)n	Simple_repeat	AZA	1
(TAGTAG)n	Simple_repeat	AZA	1
(TAGTATA)n	Simple_repeat	AZA	1
(TAGTC)n	Simple_repeat	AZA	1
(TAGTTT)n	Simple_repeat	AZA	1
(TATAAC)n	Simple_repeat	AZA	1
(TATAAT)n	Simple_repeat	AZA	1
(TATAATC)n	Simple_repeat	AZA	1
(TATACT)n	Simple_repeat	AZA	1
(TATACTA)n	Simple_repeat	AZA	1
(TATACTG)n	Simple_repeat	AZA	1
(TATAG)n	Simple_repeat	AZA	1
(TATAT)n	Simple_repeat	AZA	1
(TATATAG)n	Simple_repeat	AZA	1
(TATATCC)n	Simple_repeat	AZA	1
(TATATGA)n	Simple_repeat	AZA	1
(TATATTC)n	Simple_repeat	AZA	1
(TATCATT)n	Simple_repeat	AZA	1
(TATCTC)n	Simple_repeat	AZA	1
(TATCTCTATT)n	Simple_repeat	AZA	1
(TATCTT)n	Simple_repeat	AZA	1
(TATCTTC)n	Simple_repeat	AZA	1
(TATGAAG)n	Simple_repeat	AZA	1
(TATGT)n	Simple_repeat	AZA	1
(TATGTT)n	Simple_repeat	AZA	1
(TATGTTT)n	Simple_repeat	AZA	1
(TATTACT)n	Simple_repeat	AZA	1
(TATTATG)n	Simple_repeat	AZA	1
(TATTGAA)n	Simple_repeat	AZA	1
(TATTTCT)n	Simple_repeat	AZA	1
(TATTTTG)n	Simple_repeat	AZA	1
(TCAACA)n	Simple_repeat	AZA	1
(TCAATT)n	Simple_repeat	AZA	1
(TCACT)n	Simple_repeat	AZA	1
(TCAGCC)n	Simple_repeat	AZA	1
(TCAGGC)n	Simple_repeat	AZA	1
(TCAGTTT)n	Simple_repeat	AZA	1
(TCATA)n	Simple_repeat	AZA	1
(TCATAAT)n	Simple_repeat	AZA	1
(TCATCC)n	Simple_repeat	AZA	1
(TCATCG)n	Simple_repeat	AZA	1
(TCATCT)n	Simple_repeat	AZA	1
(TCATG)n	Simple_repeat	AZA	1
(TCATT)n	Simple_repeat	AZA	1
(TCATTA)n	Simple_repeat	AZA	1
(TCATTG)n	Simple_repeat	AZA	1
(TCCACAT)n	Simple_repeat	AZA	1
(TCCACC)n	Simple_repeat	AZA	1
(TCCAGC)n	Simple_repeat	AZA	1
(TCCAT)n	Simple_repeat	AZA	1
(TCCATG)n	Simple_repeat	AZA	1
(TCCCAC)n	Simple_repeat	AZA	1
(TCCCAG)n	Simple_repeat	AZA	1
(TCCCCA)n	Simple_repeat	AZA	1
(TCCCTCA)n	Simple_repeat	AZA	1
(TCCCTG)n	Simple_repeat	AZA	1
(TCCCTT)n	Simple_repeat	AZA	1
(TCCCTTC)n	Simple_repeat	AZA	1
(TCCG)n	Simple_repeat	AZA	1
(TCCTCA)n	Simple_repeat	AZA	1
(TCCTCTT)n	Simple_repeat	AZA	1
(TCCTGC)n	Simple_repeat	AZA	1
(TCCTGTC)n	Simple_repeat	AZA	1
(TCCTTTC)n	Simple_repeat	AZA	1
(TCTAA)n	Simple_repeat	AZA	1
(TCTACC)n	Simple_repeat	AZA	1
(TCTAT)n	Simple_repeat	AZA	1
(TCTATCT)n	Simple_repeat	AZA	1
(TCTATG)n	Simple_repeat	AZA	1
(TCTATT)n	Simple_repeat	AZA	1
(TCTCACC)n	Simple_repeat	AZA	1
(TCTCATT)n	Simple_repeat	AZA	1
(TCTCCAG)n	Simple_repeat	AZA	1
(TCTCCCT)n	Simple_repeat	AZA	1
(TCTCCCTCTG)n	Simple_repeat	AZA	1
(TCTCCTC)n	Simple_repeat	AZA	1
(TCTCCTG)n	Simple_repeat	AZA	1
(TCTCGA)n	Simple_repeat	AZA	1
(TCTCGG)n	Simple_repeat	AZA	1
(TCTCTCA)n	Simple_repeat	AZA	1
(TCTCTCTT)n	Simple_repeat	AZA	1
(TCTCTGT)n	Simple_repeat	AZA	1
(TCTCTTT)n	Simple_repeat	AZA	1
(TCTGAC)n	Simple_repeat	AZA	1
(TCTGCT)n	Simple_repeat	AZA	1
(TCTGCTAGTC)n	Simple_repeat	AZA	1
(TCTGGC)n	Simple_repeat	AZA	1
(TCTGTG)n	Simple_repeat	AZA	1
(TCTTAA)n	Simple_repeat	AZA	1
(TCTTAAT)n	Simple_repeat	AZA	1
(TCTTAC)n	Simple_repeat	AZA	1
(TCTTACT)n	Simple_repeat	AZA	1
(TCTTAT)n	Simple_repeat	AZA	1
(TCTTCAT)n	Simple_repeat	AZA	1
(TCTTCCC)n	Simple_repeat	AZA	1
(TCTTCTT)n	Simple_repeat	AZA	1
(TCTTGA)n	Simple_repeat	AZA	1
(TCTTTAA)n	Simple_repeat	AZA	1
(TCTTTTC)n	Simple_repeat	AZA	1
(TGAAA)n	Simple_repeat	AZA	1
(TGAACA)n	Simple_repeat	AZA	1
(TGAAGC)n	Simple_repeat	AZA	1
(TGAATG)n	Simple_repeat	AZA	1
(TGAATGAG)n	Simple_repeat	AZA	1
(TGAATTA)n	Simple_repeat	AZA	1
(TGAATTC)n	Simple_repeat	AZA	1
(TGAATTGC)n	Simple_repeat	AZA	1
(TGAGGA)n	Simple_repeat	AZA	1
(TGAGTAC)n	Simple_repeat	AZA	1
(TGATA)n	Simple_repeat	AZA	1
(TGATGA)n	Simple_repeat	AZA	1
(TGATTTC)n	Simple_repeat	AZA	1
(TGCCCA)n	Simple_repeat	AZA	1
(TGCGCT)n	Simple_repeat	AZA	1
(TGCTC)n	Simple_repeat	AZA	1
(TGCTCC)n	Simple_repeat	AZA	1
(TGCTCCC)n	Simple_repeat	AZA	1
(TGCTCTC)n	Simple_repeat	AZA	1
(TGCTCTCT)n	Simple_repeat	AZA	1
(TGCTGGC)n	Simple_repeat	AZA	1
(TGCTT)n	Simple_repeat	AZA	1
(TGCTTC)n	Simple_repeat	AZA	1
(TGGAA)n	Simple_repeat	AZA	1
(TGGAAGG)n	Simple_repeat	AZA	1
(TGGAATC)n	Simple_repeat	AZA	1
(TGGAC)n	Simple_repeat	AZA	1
(TGGCA)n	Simple_repeat	AZA	1
(TGGCCA)n	Simple_repeat	AZA	1
(TGGCCC)n	Simple_repeat	AZA	1
(TGGGG)n	Simple_repeat	AZA	1
(TGGTGA)n	Simple_repeat	AZA	1
(TGTAGT)n	Simple_repeat	AZA	1
(TGTATC)n	Simple_repeat	AZA	1
(TGTCAT)n	Simple_repeat	AZA	1
(TGTCC)n	Simple_repeat	AZA	1
(TGTCCC)n	Simple_repeat	AZA	1
(TGTCCTA)n	Simple_repeat	AZA	1
(TGTCTC)n	Simple_repeat	AZA	1
(TGTCTG)n	Simple_repeat	AZA	1
(TGTCTTC)n	Simple_repeat	AZA	1
(TGTCTTT)n	Simple_repeat	AZA	1
(TGTGCC)n	Simple_repeat	AZA	1
(TGTGGA)n	Simple_repeat	AZA	1
(TGTTCTC)n	Simple_repeat	AZA	1
(TGTTGCTGC)n	Simple_repeat	AZA	1
(TGTTTCT)n	Simple_repeat	AZA	1
(TTAAA)n	Simple_repeat	AZA	1
(TTAAAA)n	Simple_repeat	AZA	1
(TTAACTT)n	Simple_repeat	AZA	1
(TTAAGTA)n	Simple_repeat	AZA	1
(TTAATAA)n	Simple_repeat	AZA	1
(TTAATG)n	Simple_repeat	AZA	1
(TTAATTA)n	Simple_repeat	AZA	1
(TTAATTC)n	Simple_repeat	AZA	1
(TTACATT)n	Simple_repeat	AZA	1
(TTACCTC)n	Simple_repeat	AZA	1
(TTACT)n	Simple_repeat	AZA	1
(TTACTTC)n	Simple_repeat	AZA	1
(TTACTTT)n	Simple_repeat	AZA	1
(TTAGT)n	Simple_repeat	AZA	1
(TTAGTAA)n	Simple_repeat	AZA	1
(TTAGTC)n	Simple_repeat	AZA	1
(TTAGTT)n	Simple_repeat	AZA	1
(TTAGTTT)n	Simple_repeat	AZA	1
(TTATAA)n	Simple_repeat	AZA	1
(TTATATA)n	Simple_repeat	AZA	1
(TTATATG)n	Simple_repeat	AZA	1
(TTATC)n	Simple_repeat	AZA	1
(TTATCAA)n	Simple_repeat	AZA	1
(TTATCC)n	Simple_repeat	AZA	1
(TTATCT)n	Simple_repeat	AZA	1
(TTATCTG)n	Simple_repeat	AZA	1
(TTATGA)n	Simple_repeat	AZA	1
(TTATGAT)n	Simple_repeat	AZA	1
(TTATTA)n	Simple_repeat	AZA	1
(TTATTAT)n	Simple_repeat	AZA	1
(TTATTCA)n	Simple_repeat	AZA	1
(TTATTCAT)n	Simple_repeat	AZA	1
(TTATTTC)n	Simple_repeat	AZA	1
(TTCAATT)n	Simple_repeat	AZA	1
(TTCAC)n	Simple_repeat	AZA	1
(TTCAG)n	Simple_repeat	AZA	1
(TTCAT)n	Simple_repeat	AZA	1
(TTCATG)n	Simple_repeat	AZA	1
(TTCATTA)n	Simple_repeat	AZA	1
(TTCATTT)n	Simple_repeat	AZA	1
(TTCCC)n	Simple_repeat	AZA	1
(TTCCCTC)n	Simple_repeat	AZA	1
(TTCCTCA)n	Simple_repeat	AZA	1
(TTCTAAT)n	Simple_repeat	AZA	1
(TTCTAT)n	Simple_repeat	AZA	1
(TTCTCAT)n	Simple_repeat	AZA	1
(TTCTCC)n	Simple_repeat	AZA	1
(TTCTCCC)n	Simple_repeat	AZA	1
(TTCTCG)n	Simple_repeat	AZA	1
(TTCTCTT)n	Simple_repeat	AZA	1
(TTCTGC)n	Simple_repeat	AZA	1
(TTCTTAC)n	Simple_repeat	AZA	1
(TTCTTAT)n	Simple_repeat	AZA	1
(TTCTTC)n	Simple_repeat	AZA	1
(TTCTTCC)n	Simple_repeat	AZA	1
(TTCTTTC)n	Simple_repeat	AZA	1
(TTGAATA)n	Simple_repeat	AZA	1
(TTGAT)n	Simple_repeat	AZA	1
(TTGATC)n	Simple_repeat	AZA	1
(TTGCAA)n	Simple_repeat	AZA	1
(TTGCATC)n	Simple_repeat	AZA	1
(TTGCCT)n	Simple_repeat	AZA	1
(TTGCCTC)n	Simple_repeat	AZA	1
(TTGCTT)n	Simple_repeat	AZA	1
(TTGTGTT)n	Simple_repeat	AZA	1
(TTGTTA)n	Simple_repeat	AZA	1
(TTGTTC)n	Simple_repeat	AZA	1
(TTTAAA)n	Simple_repeat	AZA	1
(TTTAATG)n	Simple_repeat	AZA	1
(TTTAGAT)n	Simple_repeat	AZA	1
(TTTAGT)n	Simple_repeat	AZA	1
(TTTATAT)n	Simple_repeat	AZA	1
(TTTATG)n	Simple_repeat	AZA	1
(TTTATTC)n	Simple_repeat	AZA	1
(TTTATTG)n	Simple_repeat	AZA	1
(TTTCAA)n	Simple_repeat	AZA	1
(TTTCAAT)n	Simple_repeat	AZA	1
(TTTCAGC)n	Simple_repeat	AZA	1
(TTTCATC)n	Simple_repeat	AZA	1
(TTTCATG)n	Simple_repeat	AZA	1
(TTTCCA)n	Simple_repeat	AZA	1
(TTTCCAG)n	Simple_repeat	AZA	1
(TTTCCAT)n	Simple_repeat	AZA	1
(TTTCCC)n	Simple_repeat	AZA	1
(TTTCCCT)n	Simple_repeat	AZA	1
(TTTCTA)n	Simple_repeat	AZA	1
(TTTCTCA)n	Simple_repeat	AZA	1
(TTTCTCC)n	Simple_repeat	AZA	1
(TTTCTCT)n	Simple_repeat	AZA	1
(TTTCTTC)n	Simple_repeat	AZA	1
(TTTGAGC)n	Simple_repeat	AZA	1
(TTTGATA)n	Simple_repeat	AZA	1
(TTTGCC)n	Simple_repeat	AZA	1
(TTTGCT)n	Simple_repeat	AZA	1
(TTTGTCT)n	Simple_repeat	AZA	1
(TTTGTTA)n	Simple_repeat	AZA	1
(TTTTACT)n	Simple_repeat	AZA	1
(TTTTCAA)n	Simple_repeat	AZA	1
(TTTTCAC)n	Simple_repeat	AZA	1
(TTTTCAT)n	Simple_repeat	AZA	1
(TTTTCCA)n	Simple_repeat	AZA	1
(TTTTCCT)n	Simple_repeat	AZA	1
(TTTTGA)n	Simple_repeat	AZA	1
(TTTTGAA)n	Simple_repeat	AZA	1
(TTTTGC)n	Simple_repeat	AZA	1
(TTTTGCG)n	Simple_repeat	AZA	1
(TTTTGTG)n	Simple_repeat	AZA	1
(TTTTTAC)n	Simple_repeat	AZA	1
(TTTTTAG)n	Simple_repeat	AZA	1
(TTTTTCT)n	Simple_repeat	AZA	1
(TTTTTTG)n	Simple_repeat	AZA	1
(TTTTTTT)n	Simple_repeat	AZA	1
(TTTTTTTA)n	Simple_repeat	AZA	1
(TTTTTTTG)n	Simple_repeat	AZA	1
ACRO1	Satellite	AZA	1
ALR/Alpha	Satellite	AZA	1
AluYk12	SINE	AZA	1
BSR/Beta	Satellite	AZA	1
CR1-L3B_Croc	LINE	AZA	1
D20S16	Satellite	AZA	1
ERV3-16A3_I-int	LTR	AZA	1
ERVL47-int	LTR	AZA	1
Eulor2A	DNA?	AZA	1
Eulor2B	DNA?	AZA	1
Eulor3	DNA?	AZA	1
Eulor5B	DNA?	AZA	1
Eulor7	DNA?	AZA	1
Eulor9B	DNA	AZA	1
EUTREP6	Unknown	AZA	1
[truncated: 2,537 more rows]

## Sheet: Table S6 - OVCA Telescope Expr
Table S6 - OVCA Cell Line Treated vs Mock Telescope Analysis Results
locus	family	class	cell line	treatment	baseMean	Log2(Fold Change)
L1FLnI_10p11.22u	L1FLnI	LINE	A2780	AZA	2535.18	-0.00544197
L1FLnI_15q11.2h	L1FLnI	LINE	A2780	AZA	2477.91	-0.0588328
L1FLnI_9q21.12k	L1FLnI	LINE	A2780	AZA	1888.32	-0.954432
L1FLnI_4q28.1f	L1FLnI	LINE	A2780	AZA	3803.91	0.962441
L1FLnI_9q21.13a	L1FLnI	LINE	A2780	AZA	1857.71	-0.778961
L1FLnI_3q25.32h	L1FLnI	LINE	A2780	AZA	1624.79	-1.0366
L1FLnI_1q23.3h	L1FLnI	LINE	A2780	AZA	1525.24	-0.834571
L1FLnI_7p21.2k	L1FLnI	LINE	A2780	AZA	1786.34	-0.592245
L1FLnI_Xq23ab	L1FLnI	LINE	A2780	AZA	1429.48	-0.777752
L1FLnI_15q11.1e	L1FLnI	LINE	A2780	AZA	1719.06	-0.216311
L1FLnI_18p11.31s	L1FLnI	LINE	A2780	AZA	1383.11	-0.985173
L1FLnI_1p21.3o	L1FLnI	LINE	A2780	AZA	1205.94	-0.752832
L1FLnI_4q28.1g	L1FLnI	LINE	A2780	AZA	2717.58	1.0654
L1FLnI_19q13.2d	L1FLnI	LINE	A2780	AZA	1290.21	-0.395042
L1FLnI_12q13.11a	L1FLnI	LINE	A2780	AZA	1368.38	-0.19663
L1FLnI_3q25.32i	L1FLnI	LINE	A2780	AZA	1086.53	-1.28234
L1FLnI_3q25.32e	L1FLnI	LINE	A2780	AZA	1193.82	-1.05206
L1FLnI_6p22.3e	L1FLnI	LINE	A2780	AZA	1333.73	0.196974
L1FLnI_1q31.3h	L1FLnI	LINE	A2780	AZA	876.73	-1.03871
L1FLnI_1p21.3n	L1FLnI	LINE	A2780	AZA	1027.97	-0.737538
L1FLnI_1q31.3d	L1FLnI	LINE	A2780	AZA	1237.99	-0.536981
L1FLnI_13q13.3n	L1FLnI	LINE	A2780	AZA	1123.85	-0.683506
L1FLnI_4q28.1l	L1FLnI	LINE	A2780	AZA	1068.03	-0.342625
L1FLnI_4q28.3v	L1FLnI	LINE	A2780	AZA	965.09	-0.678978
L1FLnI_6q22.31o	L1FLnI	LINE	A2780	AZA	978.721	-0.677907
L1FLnI_1q42.12a	L1FLnI	LINE	A2780	AZA	1069.27	-0.334564
L1FLnI_Xq28pa	L1FLnI	LINE	A2780	AZA	646.515	-0.59464
L1FLnI_8q22.3l	L1FLnI	LINE	A2780	AZA	857.351	-1.05092
L1FLnI_13q31.1s	L1FLnI	LINE	A2780	AZA	1833.99	1.14309
L1FLnI_4q32.1fa	L1FLnI	LINE	A2780	AZA	760.018	-0.915873
L1FLnI_4q28.3y	L1FLnI	LINE	A2780	AZA	1267.11	0.495344
L1FLnI_3p24.1r	L1FLnI	LINE	A2780	AZA	845.196	-0.640552
L1FLnI_1q24.3i	L1FLnI	LINE	A2780	AZA	1014.07	-0.354948
L1FLnI_15q21.3i	L1FLnI	LINE	A2780	AZA	819.415	-0.829463
L1FLnI_9p24.2c	L1FLnI	LINE	A2780	AZA	673.271	-0.99178
L1FLnI_15q21.3k	L1FLnI	LINE	A2780	AZA	850.575	-0.544505
L1FLnI_4q28.1i	L1FLnI	LINE	A2780	AZA	795.944	-0.313573
L1FLnI_4q28.1m	L1FLnI	LINE	A2780	AZA	855.7	-0.0828402
L1FLnI_1q42.12e	L1FLnI	LINE	A2780	AZA	796.552	-0.649406
L1FLnI_14q24.1b	L1FLnI	LINE	A2780	AZA	593.093	-1.63336
L1FLnI_1p22.1d	L1FLnI	LINE	A2780	AZA	748.874	-0.341637
L1FLnI_Xq22.3p	L1FLnI	LINE	A2780	AZA	1955.72	1.51877
L1FLnI_17q23.2d	L1FLnI	LINE	A2780	AZA	835.623	-0.831608
L1FLnI_3q25.32f	L1FLnI	LINE	A2780	AZA	751.681	-1.00532
L1FLnI_1q31.3e	L1FLnI	LINE	A2780	AZA	831.439	-0.616074
L1FLnI_1q42.12d	L1FLnI	LINE	A2780	AZA	764.166	-0.683243
L1FLnI_3p24.1s	L1FLnI	LINE	A2780	AZA	722.455	-0.516352
L1FLnI_10q21.1l	L1FLnI	LINE	A2780	AZA	1162.42	0.419667
L1FLnI_8q21.13ua	L1FLnI	LINE	A2780	AZA	1047.77	0.365923
L1FLnI_Xq23bb	L1FLnI	LINE	A2780	AZA	664.354	-0.851685
L1FLnI_3p24.3d	L1FLnI	LINE	A2780	AZA	769.267	-0.259786
L1FLnI_8q21.13va	L1FLnI	LINE	A2780	AZA	889.509	0.130337
L1FLnI_8p22k	L1FLnI	LINE	A2780	AZA	587.376	-1.60109
L1FLnI_18q21.32b	L1FLnI	LINE	A2780	AZA	846.858	-0.0231852
L1FLnI_11p15.5b	L1FLnI	LINE	A2780	AZA	581.733	-0.810216
L1FLnI_Xq11.2la	L1FLnI	LINE	A2780	AZA	709.367	-0.38867
L1FLnI_15q11.1d	L1FLnI	LINE	A2780	AZA	623.11	-1.37053
L1FLnI_3q25.32g	L1FLnI	LINE	A2780	AZA	625.441	-1.01702
L1FLnI_1q42.12g	L1FLnI	LINE	A2780	AZA	597.174	-0.828406
L1FLnI_13q31.1p	L1FLnI	LINE	A2780	AZA	1468.15	1.38646
L1FLnI_9q31.1b	L1FLnI	LINE	A2780	AZA	640.687	-0.808709
L1FLnI_7p21.3r	L1FLnI	LINE	A2780	AZA	800.828	-0.314606
L1FLnI_11q22.3a	L1FLnI	LINE	A2780	AZA	690.944	-0.392394
L1FLnI_4q35.2i	L1FLnI	LINE	A2780	AZA	667.434	-0.243994
L1FLnI_11q22.3l	L1FLnI	LINE	A2780	AZA	548.648	-1.34627
L1FLnI_2p12k	L1FLnI	LINE	A2780	AZA	798.171	-0.408008
L1FLnI_12p13.32e	L1FLnI	LINE	A2780	AZA	1018.67	0.811575
L1FLnI_6q21f	L1FLnI	LINE	A2780	AZA	592.096	-0.484115
L1FLnI_13q31.1o	L1FLnI	LINE	A2780	AZA	1638.42	1.7456
L1FLnI_4q26wa	L1FLnI	LINE	A2780	AZA	656.211	-0.223174
L1FLnI_Xq25fc	L1FLnI	LINE	A2780	AZA	506.266	-0.691094
L1FLnI_3q13.11w	L1FLnI	LINE	A2780	AZA	485.823	-1.5491
L1FLnI_12q21.33d	L1FLnI	LINE	A2780	AZA	570.27	-0.933868
L1FLnI_12q14.3b	L1FLnI	LINE	A2780	AZA	621.477	-0.358529
L1FLnI_19q11c	L1FLnI	LINE	A2780	AZA	443.422	-1.44395
L1FLnI_10q11.21i	L1FLnI	LINE	A2780	AZA	594.469	-0.499203
L1FLnI_3p24.1p	L1FLnI	LINE	A2780	AZA	586.504	-0.355736
L1FLnI_13q13.2b	L1FLnI	LINE	A2780	AZA	494.936	-0.778092
L1FLnI_2q32.1f	L1FLnI	LINE	A2780	AZA	767.039	0.271877
L1FLnI_Xq13.1a	L1FLnI	LINE	A2780	AZA	696.529	0.27766
L1FLnI_10p11.1a	L1FLnI	LINE	A2780	AZA	586.403	-0.464495
L1FLnI_10q21.1a	L1FLnI	LINE	A2780	AZA	538.912	-0.763222
L1FLnI_7q11.23a	L1FLnI	LINE	A2780	AZA	576.211	-0.431282
L1FLnI_11p15.2f	L1FLnI	LINE	A2780	AZA	539.401	-0.415179
L1FLnI_14q12n	L1FLnI	LINE	A2780	AZA	643.929	-0.31258
L1FLnI_1p22.1c	L1FLnI	LINE	A2780	AZA	531.352	-0.402919
L1FLnI_6q16.3na	L1FLnI	LINE	A2780	AZA	482.532	-0.841207
L1FLnI_15q21.3aa	L1FLnI	LINE	A2780	AZA	593.364	-0.201105
L1FLnI_1p34.2b	L1FLnI	LINE	A2780	AZA	508.926	-0.654766
L1FLnI_14q21.2g	L1FLnI	LINE	A2780	AZA	501.228	-0.579278
L1FLnI_6q16.3fa	L1FLnI	LINE	A2780	AZA	592.293	-0.300178
L1FLnI_15q13.2c	L1FLnI	LINE	A2780	AZA	580.251	-0.0732192
L1FLnI_Xq25jc	L1FLnI	LINE	A2780	AZA	430.496	-0.941596
L1FLnI_1q42.12i	L1FLnI	LINE	A2780	AZA	501.046	-0.547081
L1FLnI_19q13.31b	L1FLnI	LINE	A2780	AZA	636.617	0.050635
L1FLnI_1q21.1d	L1FLnI	LINE	A2780	AZA	359.135	-2.1001
L1FLnI_1q24.3e	L1FLnI	LINE	A2780	AZA	506.836	-0.452337
L1FLnI_19p12e	L1FLnI	LINE	A2780	AZA	420.316	-0.987682
L1FLnI_5q15g	L1FLnI	LINE	A2780	AZA	458.487	-0.614699
L1FLnI_4q28.1n	L1FLnI	LINE	A2780	AZA	681.052	0.451037
L1FLnI_11q14.3s	L1FLnI	LINE	A2780	AZA	353.241	-1.47079
L1FLnI_3q25.2q	L1FLnI	LINE	A2780	AZA	726.092	0.434613
L1FLnI_1q31.3c	L1FLnI	LINE	A2780	AZA	585.206	-0.284128
L1FLnI_Xq11.2oa	L1FLnI	LINE	A2780	AZA	475.196	-0.406747
L1FLnI_6q16.2d	L1FLnI	LINE	A2780	AZA	434.452	-0.68291
L1FLnI_5q11.2ab	L1FLnI	LINE	A2780	AZA	702.797	0.540993
L1FLnI_3q12.3l	L1FLnI	LINE	A2780	AZA	494.507	-0.274121
L1FLnI_8q21.11n	L1FLnI	LINE	A2780	AZA	476.971	-0.317187
L1FLnI_14q12o	L1FLnI	LINE	A2780	AZA	494.176	-0.633184
L1FLnI_1q24.3g	L1FLnI	LINE	A2780	AZA	512.544	-0.529778
L1FLnI_16q22.3	L1FLnI	LINE	A2780	AZA	500.356	-0.733336
L1FLnI_2q23.1a	L1FLnI	LINE	A2780	AZA	557.37	0.124628
L1FLnI_5q35.1f	L1FLnI	LINE	A2780	AZA	437.026	-0.680364
L1FLnI_14q21.2i	L1FLnI	LINE	A2780	AZA	420.29	-0.585798
L1FLnI_14q12q	L1FLnI	LINE	A2780	AZA	514.037	-0.434857
L1FLnI_14q12m	L1FLnI	LINE	A2780	AZA	470.698	-0.662901
L1FLnI_6q23.2o	L1FLnI	LINE	A2780	AZA	456.084	-0.413359
L1FLnI_1q21.2f	L1FLnI	LINE	A2780	AZA	496.286	-0.0838801
L1FLnI_1q24.3l	L1FLnI	LINE	A2780	AZA	428.492	-0.389205
L1FLnI_10q21.1b	L1FLnI	LINE	A2780	AZA	377.539	-0.82815
L1FLnI_4q28.1e	L1FLnI	LINE	A2780	AZA	822.417	0.877783
L1FLnI_7p21.1k	L1FLnI	LINE	A2780	AZA	390.792	-0.613024
L1FLnI_6p21.31	L1FLnI	LINE	A2780	AZA	497.112	-0.114321
L1FLnI_6p25.3e	L1FLnI	LINE	A2780	AZA	435.355	-0.402746
L1FLnI_1q31.2m	L1FLnI	LINE	A2780	AZA	529.607	0.182204
L1FLnI_4q21.3h	L1FLnI	LINE	A2780	AZA	444.706	-0.24169
L1FLnI_2q11.2e	L1FLnI	LINE	A2780	AZA	359.047	-0.691361
L1FLnI_2p13.1a	L1FLnI	LINE	A2780	AZA	489.149	-0.0492559
L1FLnI_2q21.3h	L1FLnI	LINE	A2780	AZA	374.193	-0.758014
L1FLnI_11q14.3q	L1FLnI	LINE	A2780	AZA	307.139	-1.47535
L1FLnI_13q31.3h	L1FLnI	LINE	A2780	AZA	507.493	0.0584592
L1FLnI_1q32.3d	L1FLnI	LINE	A2780	AZA	354.297	-0.701618
L1FLnI_15q21.3j	L1FLnI	LINE	A2780	AZA	403.302	-0.532643
L1FLnI_5q35.1i	L1FLnI	LINE	A2780	AZA	353.572	-0.948504
L1FLnI_2q36.2	L1FLnI	LINE	A2780	AZA	530.199	0.42737
L1FLnI_5q35.1h	L1FLnI	LINE	A2780	AZA	346.039	-0.802574
L1FLnI_2p12n	L1FLnI	LINE	A2780	AZA	410.41	-0.364144
L1FLnI_6q22.31p	L1FLnI	LINE	A2780	AZA	396.877	-0.349243
L1FLnI_5q14.3ha	L1FLnI	LINE	A2780	AZA	314.062	-2.19091
L1FLnI_13q31.3i	L1FLnI	LINE	A2780	AZA	536.746	0.211944
L1FLnI_2p13.2a	L1FLnI	LINE	A2780	AZA	428.762	-0.0867501
L1FLnI_5q14.1c	L1FLnI	LINE	A2780	AZA	431.793	-0.11141
L1FLnI_8q22.2g	L1FLnI	LINE	A2780	AZA	429.411	-0.154479
L1FLnI_14q21.1a	L1FLnI	LINE	A2780	AZA	378.229	-0.447437
L1FLnI_21q22.13b	L1FLnI	LINE	A2780	AZA	408.715	-0.244807
L1FLnI_4q28.3x	L1FLnI	LINE	A2780	AZA	516.03	0.209182
L1FLnI_1q25.2p	L1FLnI	LINE	A2780	AZA	414.121	-0.476548
L1FLnI_15q11.1f	L1FLnI	LINE	A2780	AZA	463.726	0.0735939
L1FLnI_10q21.2f	L1FLnI	LINE	A2780	AZA	364.784	-0.971874
L1FLnI_10q21.1k	L1FLnI	LINE	A2780	AZA	614.461	0.200965
L1FLnI_5q31.3a	L1FLnI	LINE	A2780	AZA	395.016	-0.306527
L1FLnI_7q33b	L1FLnI	LINE	A2780	AZA	454.379	0.0958255
L1FLnI_10q21.1j	L1FLnI	LINE	A2780	AZA	411.142	-0.165164
L1FLnI_1q42.12c	L1FLnI	LINE	A2780	AZA	406.144	-0.421978
L1FLnI_Xq13.3pa	L1FLnI	LINE	A2780	AZA	474.024	0.256404
L1FLnI_Xq25q	L1FLnI	LINE	A2780	AZA	466.111	0.200268
L1FLnI_2q32.1da	L1FLnI	LINE	A2780	AZA	378.56	-0.167998
L1FLnI_7q36.1a	L1FLnI	LINE	A2780	AZA	413.875	-0.163626
L1FLnI_10q11.22c	L1FLnI	LINE	A2780	AZA	395.257	-0.34396
L1FLnI_5q31.1d	L1FLnI	LINE	A2780	AZA	360.156	-0.562927
L1FLnI_4p16.3a	L1FLnI	LINE	A2780	AZA	305.548	-1.06422
L1FLnI_Xq25gc	L1FLnI	LINE	A2780	AZA	326.739	-0.871576
L1FLnI_13q31.1r	L1FLnI	LINE	A2780	AZA	794.998	1.37069
L1FLnI_13q13.3m	L1FLnI	LINE	A2780	AZA	395.402	-0.49659
L1FLnI_22q11.22b	L1FLnI	LINE	A2780	AZA	299.569	-1.35979
L1FLnI_3p24.3db	L1FLnI	LINE	A2780	AZA	423.443	-0.191947
L1FLnI_14q21.2h	L1FLnI	LINE	A2780	AZA	333.959	-0.595768
L1FLnI_3p14.2n	L1FLnI	LINE	A2780	AZA	379.288	-0.532658
L1FLnI_6q16.3ma	L1FLnI	LINE	A2780	AZA	336.417	-0.87094
L1FLnI_3q25.32d	L1FLnI	LINE	A2780	AZA	358.829	-1.05591
L1FLnI_10p12.31s	L1FLnI	LINE	A2780	AZA	391.049	-0.232277
L1FLnI_2p22.2g	L1FLnI	LINE	A2780	AZA	403.059	-0.384798
L1FLnI_12q14.3c	L1FLnI	LINE	A2780	AZA	439.25	0.133924
L1FLnI_5q35.1l	L1FLnI	LINE	A2780	AZA	321.702	-0.86033
L1FLnI_4p15.31o	L1FLnI	LINE	A2780	AZA	384.645	-0.145391
L1FLnI_11p15.2k	L1FLnI	LINE	A2780	AZA	334.782	-0.672217
L1FLnI_15q21.2m	L1FLnI	LINE	A2780	AZA	481.726	0.517949
L1FLnI_7q31.1aa	L1FLnI	LINE	A2780	AZA	345.65	-0.351794
L1FLnI_1q42.2c	L1FLnI	LINE	A2780	AZA	338.131	-0.344228
L1FLnI_2q32.1ma	L1FLnI	LINE	A2780	AZA	341.576	-0.824492
L1FLnI_4q13.2o	L1FLnI	LINE	A2780	AZA	421.081	0.0466287
L1FLnI_16p11.2h	L1FLnI	LINE	A2780	AZA	390.803	0.10869
L1FLnI_3p11.1d	L1FLnI	LINE	A2780	AZA	280.39	-1.73728
L1FLnI_1q32.2g	L1FLnI	LINE	A2780	AZA	351.103	-0.152069
L1FLnI_3p22.3b	L1FLnI	LINE	A2780	AZA	361.742	-0.522969
L1FLnI_12q23.3g	L1FLnI	LINE	A2780	AZA	320.7	-0.50866
L1FLnI_1p21.3z	L1FLnI	LINE	A2780	AZA	309.411	-0.526508
L1FLnI_1q24.3h	L1FLnI	LINE	A2780	AZA	433.282	-0.157674
L1FLnI_12p11.21d	L1FLnI	LINE	A2780	AZA	347.177	-0.453167
L1FLnI_3q26.2a	L1FLnI	LINE	A2780	AZA	410.08	0.248681
L1FLnI_22q12.1g	L1FLnI	LINE	A2780	AZA	310.163	-0.662651
L1FLnI_Xq22.3o	L1FLnI	LINE	A2780	AZA	813.084	1.48626
L1FLnI_12q22h	L1FLnI	LINE	A2780	AZA	385.457	-0.12555
L1FLnI_11q22.2a	L1FLnI	LINE	A2780	AZA	475.257	0.368408
L1FLnI_4q24qa	L1FLnI	LINE	A2780	AZA	285.222	-0.745959
L1FLnI_5q12.3s	L1FLnI	LINE	A2780	AZA	300.249	-0.548086
L1FLnI_6q14.1ia	L1FLnI	LINE	A2780	AZA	365.349	-0.020768
L1FLnI_13q13.3c	L1FLnI	LINE	A2780	AZA	248.3	-1.39344
L1FLnI_2q24.3e	L1FLnI	LINE	A2780	AZA	409.378	0.365286
L1FLnI_5q11.2bb	L1FLnI	LINE	A2780	AZA	301.213	-0.563575
L1FLnI_Xq13.2ea	L1FLnI	LINE	A2780	AZA	308.905	-0.515994
L1FLnI_Xp11.21eb	L1FLnI	LINE	A2780	AZA	382.186	-0.0490662
L1FLnI_5q12.1a	L1FLnI	LINE	A2780	AZA	304.289	-0.726369
L1FLnI_1p32.3d	L1FLnI	LINE	A2780	AZA	353.689	-0.216959
L1FLnI_3q23d	L1FLnI	LINE	A2780	AZA	300.162	-0.474282
L1FLnI_8q22.3j	L1FLnI	LINE	A2780	AZA	359.1	-0.0320726
L1FLnI_11q12.1j	L1FLnI	LINE	A2780	AZA	273.092	-0.773386
L1FLnI_9q21.31a	L1FLnI	LINE	A2780	AZA	354.095	-0.16547
L1FLnI_11p15.2h	L1FLnI	LINE	A2780	AZA	304.218	-0.583874
L1FLnI_11q14.3u	L1FLnI	LINE	A2780	AZA	214.563	-1.86062
L1FLnI_8q23.1x	L1FLnI	LINE	A2780	AZA	355.925	-0.00109059
L1FLnI_5q23.1b	L1FLnI	LINE	A2780	AZA	340.23	-0.240671
L1FLnI_7q21.2k	L1FLnI	LINE	A2780	AZA	343.786	-0.0487415
L1FLnI_1p22.1b	L1FLnI	LINE	A2780	AZA	359.577	0.152488
L1FLnI_1p21.3aa	L1FLnI	LINE	A2780	AZA	289.471	-0.591363
L1FLnI_14q12p	L1FLnI	LINE	A2780	AZA	328.53	-0.723483
L1FLnI_4q28.1k	L1FLnI	LINE	A2780	AZA	317.03	-0.118011
L1FLnI_5q23.1c	L1FLnI	LINE	A2780	AZA	302.729	-0.513149
L1FLnI_5q14.1aa	L1FLnI	LINE	A2780	AZA	307.932	-0.322511
L1FLnI_18p11.31q	L1FLnI	LINE	A2780	AZA	287.23	-0.806777
L1FLnI_3q25.1c	L1FLnI	LINE	A2780	AZA	304.182	-0.302513
L1FLnI_8q22.2b	L1FLnI	LINE	A2780	AZA	343.35	-0.181761
L1FLnI_4q22.1n	L1FLnI	LINE	A2780	AZA	291.204	-0.795975
L1FLnI_4q31.1e	L1FLnI	LINE	A2780	AZA	230.149	-0.814904
L1FLnI_14q21.2d	L1FLnI	LINE	A2780	AZA	349.867	-0.341305
L1FLnI_7q21.2j	L1FLnI	LINE	A2780	AZA	290.146	-0.616755
L1FLnI_14q23.1z	L1FLnI	LINE	A2780	AZA	292.876	-0.243857
L1FLnI_2q31.2a	L1FLnI	LINE	A2780	AZA	317.555	-0.441302
L1FLnI_10q21.1ra	L1FLnI	LINE	A2780	AZA	269.482	-1.02758
L1FLnI_13q31.3m	L1FLnI	LINE	A2780	AZA	288.497	-0.456062
L1FLnI_9p21.3i	L1FLnI	LINE	A2780	AZA	303.859	-0.443065
L1FLnI_2p12j	L1FLnI	LINE	A2780	AZA	333.561	-0.78716
L1FLnI_1q25.1h	L1FLnI	LINE	A2780	AZA	322.856	-0.252576
L1FLnI_11p14.2a	L1FLnI	LINE	A2780	AZA	310.33	-0.290486
L1FLnI_Xq21.1pc	L1FLnI	LINE	A2780	AZA	319.119	-0.18273
L1FLnI_2p15a	L1FLnI	LINE	A2780	AZA	303.329	-0.0565591
L1FLnI_2q32.1qa	L1FLnI	LINE	A2780	AZA	300.376	-0.404848
L1FLnI_11p15.3c	L1FLnI	LINE	A2780	AZA	358.169	0.120832
L1FLnI_13q14.11h	L1FLnI	LINE	A2780	AZA	287.278	-0.560589
L1FLnI_Xq21.1aa	L1FLnI	LINE	A2780	AZA	309.782	0.00972595
L1FLnI_1p12u	L1FLnI	LINE	A2780	AZA	261.378	-0.703229
L1FLnI_1p33n	L1FLnI	LINE	A2780	AZA	267.65	-0.724708
L1FLnI_9q13d	L1FLnI	LINE	A2780	AZA	241.964	-0.945734
L1FLnI_11q14.3n	L1FLnI	LINE	A2780	AZA	224.38	-1.37095
L1FLnI_3p12.2g	L1FLnI	LINE	A2780	AZA	408.394	-0.0155167
L1FLnI_5q31.3b	L1FLnI	LINE	A2780	AZA	314.042	-0.355742
L1FLnI_8p23.1h	L1FLnI	LINE	A2780	AZA	349.685	0.0813448
L1FLnI_16p11.2l	L1FLnI	LINE	A2780	AZA	432.87	0.610463
L1FLnI_12p13.2d	L1FLnI	LINE	A2780	AZA	262.37	-0.503705
L1FLnI_9q21.31b	L1FLnI	LINE	A2780	AZA	336.744	-0.0246868
L1FLnI_1q31.2j	L1FLnI	LINE	A2780	AZA	467.439	0.619377
L1FLnI_13q14.11i	L1FLnI	LINE	A2780	AZA	355.359	0.18209
L1FLnI_5q23.3a	L1FLnI	LINE	A2780	AZA	249.842	-0.764175
L1FLnI_5q15f	L1FLnI	LINE	A2780	AZA	234.706	-0.769958
L1FLnI_10q11.21g	L1FLnI	LINE	A2780	AZA	257.681	-0.541258
L1FLnI_13q13.3o	L1FLnI	LINE	A2780	AZA	270.844	-0.667476
L1FLnI_22q12.1c	L1FLnI	LINE	A2780	AZA	253.486	-0.530678
L1FLnI_6p25.3d	L1FLnI	LINE	A2780	AZA	390.326	0.503942
L1FLnI_11q21q	L1FLnI	LINE	A2780	AZA	234.823	-0.716603
L1FLnI_11q22.3aa	L1FLnI	LINE	A2780	AZA	289.525	-0.226859
L1FLnI_6q22.31q	L1FLnI	LINE	A2780	AZA	261.866	-0.509168
L1FLnI_5q35.1k	L1FLnI	LINE	A2780	AZA	263.581	-0.701108
L1FLnI_3p24.3e	L1FLnI	LINE	A2780	AZA	280.565	-0.0904596
L1FLnI_8q24.3a	L1FLnI	LINE	A2780	AZA	244.748	-0.561249
L1FLnI_6q16.2a	L1FLnI	LINE	A2780	AZA	262.538	-0.60596
L1FLnI_14q22.3j	L1FLnI	LINE	A2780	AZA	253.663	-0.44921
L1FLnI_3p22.2e	L1FLnI	LINE	A2780	AZA	251.151	-0.821178
L1FLnI_11p15.4ga	L1FLnI	LINE	A2780	AZA	302.075	0.0963583
L1FLnI_14q32.12f	L1FLnI	LINE	A2780	AZA	361.565	0.408382
L1FLnI_5q13.2a	L1FLnI	LINE	A2780	AZA	260.178	-0.277879
L1FLnI_15q13.1a	L1FLnI	LINE	A2780	AZA	319.679	-0.0950151
L1FLnI_Xq11.2ga	L1FLnI	LINE	A2780	AZA	254.021	-0.487332
L1FLnI_1p13.1f	L1FLnI	LINE	A2780	AZA	280.601	-0.229945
L1FLnI_15q15.1	L1FLnI	LINE	A2780	AZA	272.568	-0.252411
L1FLnI_21q21.1b	L1FLnI	LINE	A2780	AZA	310.555	0.169045
L1FLnI_1q42.12h	L1FLnI	LINE	A2780	AZA	223.834	-1.03889
L1FLnI_18p11.21k	L1FLnI	LINE	A2780	AZA	295.683	0.0712248
L1FLnI_Xq22.3c	L1FLnI	LINE	A2780	AZA	216.769	-0.88755
L1FLnI_9q22.32c	L1FLnI	LINE	A2780	AZA	231.016	-0.736223
L1FLnI_1q42.12b	L1FLnI	LINE	A2780	AZA	275.035	-0.320247
L1FLnI_3p21.2m	L1FLnI	LINE	A2780	AZA	316.301	0.23628
L1FLnI_5q33.1a	L1FLnI	LINE	A2780	AZA	271.807	-0.00103864
L1FLnI_22q12.1h	L1FLnI	LINE	A2780	AZA	261.29	-0.303601
L1FLnI_13q14.2u	L1FLnI	LINE	A2780	AZA	236.91	-0.885295
L1FLnI_14q23.3g	L1FLnI	LINE	A2780	AZA	323.361	0.143514
L1FLnI_4p15.31r	L1FLnI	LINE	A2780	AZA	301.613	-0.0538256
L1FLnI_3q21.1c	L1FLnI	LINE	A2780	AZA	487.873	1.1064
L1FLnI_7q36.1o	L1FLnI	LINE	A2780	AZA	253.063	-0.412274
L1FLnI_2q23.1j	L1FLnI	LINE	A2780	AZA	301.733	-0.0858685
L1FLnI_10p11.22d	L1FLnI	LINE	A2780	AZA	256.951	-0.439191
L1FLnI_5q14.1ba	L1FLnI	LINE	A2780	AZA	231.771	-0.68855
L1FLnI_5q12.1c	L1FLnI	LINE	A2780	AZA	232.315	-0.91397
L1FLnI_1p31.1ea	L1FLnI	LINE	A2780	AZA	253.009	-0.935342
L1FLnI_18q11.2g	L1FLnI	LINE	A2780	AZA	216.649	-0.921312
L1FLnI_Xq23d	L1FLnI	LINE	A2780	AZA	441.004	0.786507
L1FLnI_3p11.1b	L1FLnI	LINE	A2780	AZA	202.841	-1.63726
L1FLnI_10q21.1d	L1FLnI	LINE	A2780	AZA	225.013	-1.0523
L1FLnI_2p12m	L1FLnI	LINE	A2780	AZA	265.699	-0.213381
L1FLnI_2q24.1oa	L1FLnI	LINE	A2780	AZA	250.366	-0.377501
L1FLnI_3p12.2f	L1FLnI	LINE	A2780	AZA	528.999	0.835496
L1FLnI_6q24.2g	L1FLnI	LINE	A2780	AZA	299.554	0.109325
L1FLnI_3q23w	L1FLnI	LINE	A2780	AZA	264.082	-0.353326
L1FLnI_2p12g	L1FLnI	LINE	A2780	AZA	256.767	-0.387225
L1FLnI_Xq11.2ra	L1FLnI	LINE	A2780	AZA	251.818	-0.216461
L1FLnI_7p14.2e	L1FLnI	LINE	A2780	AZA	248.307	-0.189681
L1FLnI_4q22.1i	L1FLnI	LINE	A2780	AZA	235.056	-0.69707
L1FLnI_6q13m	L1FLnI	LINE	A2780	AZA	262.429	-0.182859
L1FLnI_20p11.23d	L1FLnI	LINE	A2780	AZA	251.065	-0.0684007
L1FLnI_11q14.3p	L1FLnI	LINE	A2780	AZA	200.75	-1.06498
L1FLnI_5q12.3r	L1FLnI	LINE	A2780	AZA	269.731	-0.14329
L1FLnI_4q22.1k	L1FLnI	LINE	A2780	AZA	219.209	-0.461569
L1FLnI_6q22.1ka	L1FLnI	LINE	A2780	AZA	239.199	-0.593998
L1FLnI_3p24.1u	L1FLnI	LINE	A2780	AZA	230.688	-0.546679
L1FLnI_5q14.1z	L1FLnI	LINE	A2780	AZA	247.647	-0.315674
L1FLnI_18p11.31n	L1FLnI	LINE	A2780	AZA	232.098	-0.953102
L1FLnI_2q23.1h	L1FLnI	LINE	A2780	AZA	303.067	0.0808428
L1FLnI_7q34f	L1FLnI	LINE	A2780	AZA	191.041	-0.828979
L1FLnI_9p11.2c	L1FLnI	LINE	A2780	AZA	207.472	-1.06745
L1FLnI_1p31.1ga	L1FLnI	LINE	A2780	AZA	236.127	-0.40163
L1FLnI_5q12.1ea	L1FLnI	LINE	A2780	AZA	282.8	-0.291191
L1FLnI_6q12v	L1FLnI	LINE	A2780	AZA	201.775	-1.21587
L1FLnI_16q12.1n	L1FLnI	LINE	A2780	AZA	270.577	-0.153813
L1FLnI_Xq11.2sa	L1FLnI	LINE	A2780	AZA	224.388	-0.573351
L1FLnI_1q25.1q	L1FLnI	LINE	A2780	AZA	278.116	0.0877128
L1FLnI_4q32.1ea	L1FLnI	LINE	A2780	AZA	231.896	-0.356121
L1FLnI_14q24.2b	L1FLnI	LINE	A2780	AZA	307.174	0.375064
L1FLnI_2q23.1g	L1FLnI	LINE	A2780	AZA	272.066	-0.167057
L1FLnI_3q13.12h	L1FLnI	LINE	A2780	AZA	260.679	-0.240724
L1FLnI_7p14.3u	L1FLnI	LINE	A2780	AZA	213.854	-0.847572
L1FLnI_8q22.3t	L1FLnI	LINE	A2780	AZA	190.627	-1.23354
L1FLnI_11q22.3z	L1FLnI	LINE	A2780	AZA	261.894	-0.102005
L1FLnI_20q13.13	L1FLnI	LINE	A2780	AZA	277.048	0.0605476
L1FLnI_14q21.2k	L1FLnI	LINE	A2780	AZA	227.027	-0.751246
L1FLnI_5p13.2z	L1FLnI	LINE	A2780	AZA	240.424	-0.354489
L1FLnI_20q11.22	L1FLnI	LINE	A2780	AZA	244.997	-0.187089
L1FLnI_1p22.2t	L1FLnI	LINE	A2780	AZA	247.184	-0.0200975
L1ORF2_3q25.2	L1ORF2	LINE	A2780	AZA	262.332	-0.0227633
L1FLnI_1p21.2c	L1FLnI	LINE	A2780	AZA	247.432	-0.0874692
L1FLnI_1q32.3g	L1FLnI	LINE	A2780	AZA	284.166	0.1387
L1FLnI_4q22.1j	L1FLnI	LINE	A2780	AZA	194.434	-0.80037
L1FLnI_14q23.3j	L1FLnI	LINE	A2780	AZA	280.476	0.13631
L1FLnI_5q35.1g	L1FLnI	LINE	A2780	AZA	206.732	-1.09581
L1FLnI_2q35h	L1FLnI	LINE	A2780	AZA	245.821	-0.0683063
L1FLnI_Xp11.3l	L1FLnI	LINE	A2780	AZA	671.563	1.9404
L1FLnI_5p13.2v	L1FLnI	LINE	A2780	AZA	194.278	-0.565013
L1FLnI_3p25.1i	L1FLnI	LINE	A2780	AZA	212.809	-0.609204
L1FLnI_14q13.3i	L1FLnI	LINE	A2780	AZA	217.068	-0.392394
L1FLnI_Xq22.3d	L1FLnI	LINE	A2780	AZA	180.095	-1.10441
L1FLnI_10q26.12g	L1FLnI	LINE	A2780	AZA	233.872	0.0229567
L1FLnI_19p12d	L1FLnI	LINE	A2780	AZA	215.325	-0.451071
L1FLnI_3q12.2b	L1FLnI	LINE	A2780	AZA	186.919	-0.784769
L1FLnI_6q14.1a	L1FLnI	LINE	A2780	AZA	228.435	-0.395119
L1FLnI_12q12f	L1FLnI	LINE	A2780	AZA	270.191	0.104868
L1FLnI_4q32.1da	L1FLnI	LINE	A2780	AZA	224.331	-0.391307
L1FLnI_18p11.31r	L1FLnI	LINE	A2780	AZA	146.403	-1.6629
L1FLnI_14q22.1o	L1FLnI	LINE	A2780	AZA	306.551	0.365214
L1FLnI_7p21.2g	L1FLnI	LINE	A2780	AZA	276.748	0.215466
L1FLnI_10q21.1m	L1FLnI	LINE	A2780	AZA	291.67	0.223161
L1FLnI_1p31.1rc	L1FLnI	LINE	A2780	AZA	221.568	-0.253277
L1FLnI_2p12h	L1FLnI	LINE	A2780	AZA	204.282	-0.55767
L1FLnI_4q24n	L1FLnI	LINE	A2780	AZA	212.467	-0.540284
L1FLnI_8p21.2m	L1FLnI	LINE	A2780	AZA	186.274	-0.866507
L1FLnI_2q31.1ba	L1FLnI	LINE	A2780	AZA	217.291	-0.360446
L1FLnI_11q14.1t	L1FLnI	LINE	A2780	AZA	213.019	-0.666043
L1FLnI_7p15.3g	L1FLnI	LINE	A2780	AZA	239.336	-0.0245455
L1FLnI_12p13.33c	L1FLnI	LINE	A2780	AZA	263.672	0.0681365
L1FLnI_14q21.2a	L1FLnI	LINE	A2780	AZA	279.484	0.116284
L1FLnI_13q31.3j	L1FLnI	LINE	A2780	AZA	265.585	0.0784818
L1FLnI_6q16.3c	L1FLnI	LINE	A2780	AZA	278.932	0.401812
L1FLnI_9q22.33a	L1FLnI	LINE	A2780	AZA	207.206	-0.682456
L1FLnI_Xq25mc	L1FLnI	LINE	A2780	AZA	162.011	-0.996269
L1FLnI_11q13.4f	L1FLnI	LINE	A2780	AZA	212.495	-0.476382
L1FLnI_9p11.2d	L1FLnI	LINE	A2780	AZA	223.015	-0.179182
L1FLnI_2p15i	L1FLnI	LINE	A2780	AZA	230.136	-0.129878
L1FLnI_9q22.32d	L1FLnI	LINE	A2780	AZA	189.155	-0.631757
L1FLnI_Xp11.3t	L1FLnI	LINE	A2780	AZA	271.297	0.329483
L1FLnI_10q23.31f	L1FLnI	LINE	A2780	AZA	173.363	-1.14083
L1FLnI_14q11.2j	L1FLnI	LINE	A2780	AZA	199.364	-0.423164
L1FLnI_9q31.2b	L1FLnI	LINE	A2780	AZA	215.172	-0.295908
L1FLnI_9p22.3a	L1FLnI	LINE	A2780	AZA	286.493	0.307083
L1FLnI_3q13.33d	L1FLnI	LINE	A2780	AZA	250.681	-0.0191777
L1FLnI_11p13y	L1FLnI	LINE	A2780	AZA	244.43	0.176965
L1FLnI_3q13.13c	L1FLnI	LINE	A2780	AZA	236.15	0.122629
L1FLnI_5q14.1u	L1FLnI	LINE	A2780	AZA	241.491	0.077237
L1FLnI_1p32.3h	L1FLnI	LINE	A2780	AZA	201.504	-0.150217
L1FLnI_19p13.11	L1FLnI	LINE	A2780	AZA	208.987	-0.535524
L1FLnI_19q13.31e	L1FLnI	LINE	A2780	AZA	247.367	0.245465
L1FLnI_11q14.1s	L1FLnI	LINE	A2780	AZA	224.652	0.176825
L1FLnI_2q14.2m	L1FLnI	LINE	A2780	AZA	248.112	0.132625
L1FLnI_19q12p	L1FLnI	LINE	A2780	AZA	176.301	-0.632633
L1FLnI_12p13.33a	L1FLnI	LINE	A2780	AZA	248.228	0.266164
L1FLnI_22q12.1f	L1FLnI	LINE	A2780	AZA	202.232	-0.556048
L1FLnI_9p22.2f	L1FLnI	LINE	A2780	AZA	205.345	-0.152602
L1FLnI_18q12.2d	L1FLnI	LINE	A2780	AZA	241.128	-0.124828
L1FLnI_11q13.4h	L1FLnI	LINE	A2780	AZA	204.605	-0.370807
L1FLnI_3q23u	L1FLnI	LINE	A2780	AZA	209.689	-0.446755
L1FLnI_Xp21.2f	L1FLnI	LINE	A2780	AZA	193.634	-0.848853
L1FLnI_Xq11.2pa	L1FLnI	LINE	A2780	AZA	188.731	-0.581707
L1FLnI_10q21.3f	L1FLnI	LINE	A2780	AZA	210.413	-0.463662
L1FLnI_4q28.1la	L1FLnI	LINE	A2780	AZA	242.241	0.231029
L1FLnI_6p12.3h	L1FLnI	LINE	A2780	AZA	242.199	0.291402
L1FLnI_1p22.1g	L1FLnI	LINE	A2780	AZA	272.558	0.4492
L1FLnI_10q23.31a	L1FLnI	LINE	A2780	AZA	234.16	0.132625
L1FLnI_11p12ra	L1FLnI	LINE	A2780	AZA	187.037	-0.534799
L1FLnI_Xp11.21nb	L1FLnI	LINE	A2780	AZA	177.449	-0.341837
L1FLnI_Xp22.2p	L1FLnI	LINE	A2780	AZA	166.742	-0.595593
L1FLnI_2p12i	L1FLnI	LINE	A2780	AZA	196.826	-0.780758
L1FLnI_11q22.3d	L1FLnI	LINE	A2780	AZA	170.741	-0.832286
L1FLnI_3q25.32c	L1FLnI	LINE	A2780	AZA	168.597	-1.22994
L1FLnI_12q12sa	L1FLnI	LINE	A2780	AZA	218.96	-0.0275552
L1FLnI_19q13.11a	L1FLnI	LINE	A2780	AZA	213.205	-0.269715
L1FLnI_14q12r	L1FLnI	LINE	A2780	AZA	230.13	-0.216928
L1FLnI_4q25ia	L1FLnI	LINE	A2780	AZA	172.368	-1.03078
L1FLnI_8q21.3aa	L1FLnI	LINE	A2780	AZA	198.48	-0.603203
L1FLnI_14q12ra	L1FLnI	LINE	A2780	AZA	220.224	0.0154417
L1FLnI_4q12pa	L1FLnI	LINE	A2780	AZA	162.64	-1.14455
L1FLnI_8q24.13n	L1FLnI	LINE	A2780	AZA	221.624	-0.0912383
L1FLnI_1p32.3c	L1FLnI	LINE	A2780	AZA	239.434	0.00628962
L1FLnI_3p22.3d	L1FLnI	LINE	A2780	AZA	182.829	-0.317407
L1FLnI_1p31.1ab	L1FLnI	LINE	A2780	AZA	203.976	-0.147483
L1FLnI_3q11.1j	L1FLnI	LINE	A2780	AZA	182.637	-0.499245
L1FLnI_Xq25ic	L1FLnI	LINE	A2780	AZA	159.532	-0.670515
L1FLnI_12q13.11y	L1FLnI	LINE	A2780	AZA	236.502	0.118618
L1FLnI_12q12db	L1FLnI	LINE	A2780	AZA	195.58	-0.0372995
L1FLnI_5q31.1a	L1FLnI	LINE	A2780	AZA	193.655	-0.275459
L1FLnI_19q13.31d	L1FLnI	LINE	A2780	AZA	224.432	0.101837
L1FLnI_2p16.1x	L1FLnI	LINE	A2780	AZA	197.098	-0.317969
L1FLnI_5q21.3p	L1FLnI	LINE	A2780	AZA	173.248	-0.649482
L1FLnI_15q23n	L1FLnI	LINE	A2780	AZA	219.62	-0.0406741
L1FLnI_Xq22.1bb	L1FLnI	LINE	A2780	AZA	169.293	-0.69389
L1FLnI_4q24sa	L1FLnI	LINE	A2780	AZA	168.353	-0.422589
L1FLnI_3p14.3l	L1FLnI	LINE	A2780	AZA	192.98	-0.0879255
L1FLnI_13q14.11g	L1FLnI	LINE	A2780	AZA	165.959	-0.55867
L1FLnI_5p12j	L1FLnI	LINE	A2780	AZA	160.507	-0.388536
L1FLnI_11q22.3m	L1FLnI	LINE	A2780	AZA	162.934	-0.783395
L1FLnI_8q22.2c	L1FLnI	LINE	A2780	AZA	207.649	-0.158686
L1FLnI_1q42.2b	L1FLnI	LINE	A2780	AZA	177.987	-0.189302
L1FLnI_8q21.13ja	L1FLnI	LINE	A2780	AZA	228.865	-0.0372993
L1FLnI_17q23.2a	L1FLnI	LINE	A2780	AZA	193.185	-0.0899372
L1FLnI_4q24cb	L1FLnI	LINE	A2780	AZA	198.006	-0.0442301
L1FLnI_6p24.1b	L1FLnI	LINE	A2780	AZA	198.523	-0.272036
L1FLnI_4p15.31b	L1FLnI	LINE	A2780	AZA	174.427	-0.417314
L1FLnI_Xp11.22ka	L1FLnI	LINE	A2780	AZA	171.074	-0.499488
L1FLnI_14q23.3m	L1FLnI	LINE	A2780	AZA	214.416	0.0515268
L1FLnI_2p13.1c	L1FLnI	LINE	A2780	AZA	180.013	-0.665224
L1FLnI_4p14p	L1FLnI	LINE	A2780	AZA	156.821	-0.551872
L1FLnI_2q24.3n	L1FLnI	LINE	A2780	AZA	176.91	-0.512723
L1FLnI_Xq26.3i	L1FLnI	LINE	A2780	AZA	185.932	0.0221546
L1FLnI_6q16.3e	L1FLnI	LINE	A2780	AZA	252.06	0.52096
L1FLnI_10q22.2c	L1FLnI	LINE	A2780	AZA	198.353	-0.216005
L1FLnI_1q31.1w	L1FLnI	LINE	A2780	AZA	178.016	-0.549524
L1FLnI_16q22.2e	L1FLnI	LINE	A2780	AZA	196.661	0.127377
L1FLnI_5q15i	L1FLnI	LINE	A2780	AZA	176.54	-0.438215
L1FLnI_2p23.3a	L1FLnI	LINE	A2780	AZA	156.545	-0.460241
L1FLnI_2q24.3p	L1FLnI	LINE	A2780	AZA	161.101	-0.624628
L1FLnI_12p13.32g	L1FLnI	LINE	A2780	AZA	214.43	0.129458
L1FLnI_1q42.12f	L1FLnI	LINE	A2780	AZA	174.417	-0.763625
L1FLnI_15q13.2e	L1FLnI	LINE	A2780	AZA	190.282	0.0456899
L1FLnI_3q25.2r	L1FLnI	LINE	A2780	AZA	236.869	0.288433
L1FLnI_2p12o	L1FLnI	LINE	A2780	AZA	199.342	-0.354177
L1FLnI_3q25.32k	L1FLnI	LINE	A2780	AZA	197.711	-0.0301751
L1FLnI_7p21.2m	L1FLnI	LINE	A2780	AZA	177.213	-0.597983
L1FLnI_13q31.2d	L1FLnI	LINE	A2780	AZA	132.005	-1.53761
L1FLnI_4p13e	L1FLnI	LINE	A2780	AZA	215.474	0.0599975
L1FLnI_5q15z	L1FLnI	LINE	A2780	AZA	183.758	0.0121696
L1FLnI_4q24ya	L1FLnI	LINE	A2780	AZA	162.596	-0.763123
L1FLnI_6p12.1w	L1FLnI	LINE	A2780	AZA	195.726	-0.0445553
L1FLnI_1q31.1i	L1FLnI	LINE	A2780	AZA	174.651	-0.118196
L1FLnI_Xq22.3f	L1FLnI	LINE	A2780	AZA	142.544	-1.00617
L1FLnI_14q22.1n	L1FLnI	LINE	A2780	AZA	252.081	0.445705
L1FLnI_13q22.1a	L1FLnI	LINE	A2780	AZA	209.017	0.0314695
L1FLnI_17p13.3a	L1FLnI	LINE	A2780	AZA	168.318	-0.702795
L1FLnI_2q24.3r	L1FLnI	LINE	A2780	AZA	153.388	-0.975082
L1FLnI_5p13.3a	L1FLnI	LINE	A2780	AZA	144.007	-1.45723
L1FLnI_11p15.2l	L1FLnI	LINE	A2780	AZA	161.584	-0.539697
L1FLnI_1q25.1g	L1FLnI	LINE	A2780	AZA	190.349	-0.254607
L1FLnI_8q22.2o	L1FLnI	LINE	A2780	AZA	166.485	-0.47542
L1FLnI_9p24.1l	L1FLnI	LINE	A2780	AZA	200.83	-0.00335242
L1FLnI_1p13.3e	L1FLnI	LINE	A2780	AZA	288.045	0.77987
L1FLnI_11p13f	L1FLnI	LINE	A2780	AZA	167.533	-0.436016
L1FLnI_8q22.3v	L1FLnI	LINE	A2780	AZA	217.601	0.247724
L1FLnI_1p31.3r	L1FLnI	LINE	A2780	AZA	195.832	0.0265094
L1FLnI_15q22.31a	L1FLnI	LINE	A2780	AZA	176.514	-0.477254
L1FLnI_14q24.2c	L1FLnI	LINE	A2780	AZA	207.052	0.231282
L1FLnI_Xq21.2r	L1FLnI	LINE	A2780	AZA	174.889	-0.290486
L1FLnI_8q21.3ba	L1FLnI	LINE	A2780	AZA	165.913	-0.733268
L1FLnI_15q22.2a	L1FLnI	LINE	A2780	AZA	169.342	-0.220097
L1FLnI_13q13.1b	L1FLnI	LINE	A2780	AZA	196.966	0.0363909
L1FLnI_14q23.3h	L1FLnI	LINE	A2780	AZA	208.712	0.182604
L1FLnI_7p14.3r	L1FLnI	LINE	A2780	AZA	173.358	-0.176052
L1FLnI_2q24.3s	L1FLnI	LINE	A2780	AZA	161.461	-0.761013
L1FLnI_11q14.3i	L1FLnI	LINE	A2780	AZA	179.189	-0.229945
L1FLnI_11p14.2b	L1FLnI	LINE	A2780	AZA	185.747	0.131512
L1FLnI_3p21.2k	L1FLnI	LINE	A2780	AZA	194.184	-0.0960888
L1FLnI_8q22.2f	L1FLnI	LINE	A2780	AZA	193.439	-0.105249
L1FLnI_1q41k	L1FLnI	LINE	A2780	AZA	170.84	-0.680605
L1FLnI_11q22.3t	L1FLnI	LINE	A2780	AZA	174.392	-0.219891
L1ORF2_2p12	L1ORF2	LINE	A2780	AZA	189.028	-0.286731
L1FLnI_12q15k	L1FLnI	LINE	A2780	AZA	175.533	-0.0360346
L1FLnI_3q13.12i	L1FLnI	LINE	A2780	AZA	166.138	-0.526781
L1FLnI_13q34a	L1FLnI	LINE	A2780	AZA	165.088	-0.638224
L1FLnI_13q32.1f	L1FLnI	LINE	A2780	AZA	175.086	-0.209767
L1FLnI_6q14.1pa	L1FLnI	LINE	A2780	AZA	220.857	0.327667
L1FLnI_11q25p	L1FLnI	LINE	A2780	AZA	193.462	-0.180019
L1FLnI_4q28.3w	L1FLnI	LINE	A2780	AZA	259.595	0.697124
L1FLnI_4q35.2k	L1FLnI	LINE	A2780	AZA	197.686	0.179987
L1FLnI_11p15.2m	L1FLnI	LINE	A2780	AZA	161.357	-0.255661
L1FLnI_1p22.2c	L1FLnI	LINE	A2780	AZA	153.286	-0.266078
L1FLnI_22q11.23b	L1FLnI	LINE	A2780	AZA	151.148	-0.759892
L1FLnI_8q11.21b	L1FLnI	LINE	A2780	AZA	184.174	-0.0708222
L1FLnI_15q24.3a	L1FLnI	LINE	A2780	AZA	161.804	-0.462604
L1FLnI_7p21.1n	L1FLnI	LINE	A2780	AZA	173.663	-0.102709
L1FLnI_2p14r	L1FLnI	LINE	A2780	AZA	182.376	0.177399
L1FLnI_9p24.1ea	L1FLnI	LINE	A2780	AZA	140.402	-0.954978
L1FLnI_11p15.4z	L1FLnI	LINE	A2780	AZA	132.007	-2.07896
L1FLnI_13q31.1u	L1FLnI	LINE	A2780	AZA	310.42	1.19152
L1FLI_7q31.1b	L1FLI	LINE	A2780	AZA	159.431	-0.393442
L1FLnI_22q12.1e	L1FLnI	LINE	A2780	AZA	168.809	-0.271765
L1FLnI_18p11.22g	L1FLnI	LINE	A2780	AZA	178.95	-0.179318
L1FLnI_4q28.2l	L1FLnI	LINE	A2780	AZA	218.169	0.402324
L1FLnI_8q11.23n	L1FLnI	LINE	A2780	AZA	195.631	0.0721988
L1FLnI_7q22.1e	L1FLnI	LINE	A2780	AZA	174.318	-0.224783
L1FLnI_5q31.2e	L1FLnI	LINE	A2780	AZA	167.114	-0.139432
L1FLnI_8p23.1b	L1FLnI	LINE	A2780	AZA	115.479	-1.76391
L1FLnI_1q42.12l	L1FLnI	LINE	A2780	AZA	144.904	-0.602218
L1FLnI_2p25.1e	L1FLnI	LINE	A2780	AZA	167.397	-0.424823
L1FLnI_4q35.2f	L1FLnI	LINE	A2780	AZA	190.584	0.027853
L1FLnI_1p22.1i	L1FLnI	LINE	A2780	AZA	181.39	0.231387
L1FLnI_1q25.1k	L1FLnI	LINE	A2780	AZA	193.718	0.0154955
L1FLnI_14q23.1y	L1FLnI	LINE	A2780	AZA	171.899	-0.0203495
L1FLnI_12q12cb	L1FLnI	LINE	A2780	AZA	187.917	0.134373
L1FLnI_22q12.1b	L1FLnI	LINE	A2780	AZA	170.4	-0.114064
L1FLnI_3p24.3cb	L1FLnI	LINE	A2780	AZA	166.265	-0.272694
L1FLnI_19q13.12b	L1FLnI	LINE	A2780	AZA	107.817	-2.743
L1FLnI_8q22.3m	L1FLnI	LINE	A2780	AZA	127.239	-1.13287
L1FLnI_4q24p	L1FLnI	LINE	A2780	AZA	170.972	0.125536
L1FLnI_Xq11.1p	L1FLnI	LINE	A2780	AZA	150.544	-0.702697
L1FLnI_16q22.2d	L1FLnI	LINE	A2780	AZA	143.275	-0.459426
L1FLnI_3q13.33c	L1FLnI	LINE	A2780	AZA	183.063	-0.0174731
L1FLnI_3p21.2f	L1FLnI	LINE	A2780	AZA	170.8	-0.369578
L1FLnI_13q22.3a	L1FLnI	LINE	A2780	AZA	206.607	0.240134
L1FLnI_8q21.11q	L1FLnI	LINE	A2780	AZA	168.052	-0.157013
L1FLnI_15q21.3ba	L1FLnI	LINE	A2780	AZA	153.733	-0.208728
L1FLnI_15q21.3n	L1FLnI	LINE	A2780	AZA	157.886	-0.736903
L1FLnI_8q11.21f	L1FLnI	LINE	A2780	AZA	163.6	-0.352564
L1FLnI_9q21.31c	L1FLnI	LINE	A2780	AZA	190.829	0.047321
L1FLnI_Xp11.21qb	L1FLnI	LINE	A2780	AZA	126.253	-0.943853
L1FLnI_5p12k	L1FLnI	LINE	A2780	AZA	160.131	-0.146287
L1FLnI_3p14.2q	L1FLnI	LINE	A2780	AZA	152.872	-0.836601
L1FLnI_1q42.12j	L1FLnI	LINE	A2780	AZA	155.899	-0.956181
L1FLnI_8p22h	L1FLnI	LINE	A2780	AZA	177.48	-0.0332527
L1FLnI_13q14.2o	L1FLnI	LINE	A2780	AZA	145.705	-0.646783
L1FLnI_11q14.3h	L1FLnI	LINE	A2780	AZA	144.428	-0.933087
L1FLnI_8p22n	L1FLnI	LINE	A2780	AZA	161.104	-0.35449
L1FLnI_13q12.3h	L1FLnI	LINE	A2780	AZA	173.131	0.0276558
L1FLnI_3q13.33x	L1FLnI	LINE	A2780	AZA	180.539	0.0600566
L1FLnI_Xq25kc	L1FLnI	LINE	A2780	AZA	131.321	-0.882019
L1FLnI_7q21.13p	L1FLnI	LINE	A2780	AZA	159.832	-0.274339
L1FLnI_2p23.2a	L1FLnI	LINE	A2780	AZA	152.39	-0.479922
L1FLnI_9p24.2e	L1FLnI	LINE	A2780	AZA	127.384	-0.859471
L1FLnI_7p14.3p	L1FLnI	LINE	A2780	AZA	163.324	-0.361972
L1FLnI_5q15h	L1FLnI	LINE	A2780	AZA	143.832	-0.724208
L1FLnI_10q23.31e	L1FLnI	LINE	A2780	AZA	134.098	-0.900297
L1FLnI_3q12.3m	L1FLnI	LINE	A2780	AZA	164.807	-0.292066
L1FLnI_10p11.22f	L1FLnI	LINE	A2780	AZA	179.389	-0.0139076
L1FLnI_Xq25lc	L1FLnI	LINE	A2780	AZA	118.32	-1.27503
L1FLnI_9q22.31d	L1FLnI	LINE	A2780	AZA	143.834	-0.692163
L1FLnI_11p14.1h	L1FLnI	LINE	A2780	AZA	197.754	0.204458
L1FLnI_2p21b	L1FLnI	LINE	A2780	AZA	192.191	0.234561
L1FLnI_6q16.3la	L1FLnI	LINE	A2780	AZA	148.186	-0.686582
L1FLnI_2q21.3f	L1FLnI	LINE	A2780	AZA	141.677	-0.950163
L1FLnI_2q23.1c	L1FLnI	LINE	A2780	AZA	173.231	-0.235569
L1FLnI_11q23.1b	L1FLnI	LINE	A2780	AZA	138.067	-0.377587
L1FLnI_15q24.3g	L1FLnI	LINE	A2780	AZA	140.71	-0.293054
L1FLnI_2q31.2g	L1FLnI	LINE	A2780	AZA	179.285	0.00452056
L1FLnI_9q22.32b	L1FLnI	LINE	A2780	AZA	136.724	-0.523858
L1FLnI_2q11.1b	L1FLnI	LINE	A2780	AZA	180.009	0.0387586
L1FLnI_7p15.2a	L1FLnI	LINE	A2780	AZA	132.093	-0.673779
L1FLnI_8q22.3n	L1FLnI	LINE	A2780	AZA	126.968	-0.693692
L1FLnI_5q31.1r	L1FLnI	LINE	A2780	AZA	143.724	-0.414368
L1FLnI_9q31.1a	L1FLnI	LINE	A2780	AZA	189.905	0.255482
L1FLnI_2q21.3e	L1FLnI	LINE	A2780	AZA	127.186	-0.780555
L1FLnI_11p15.3h	L1FLnI	LINE	A2780	AZA	208.195	0.642944
L1FLnI_9p24.2d	L1FLnI	LINE	A2780	AZA	127.846	-0.76368
L1FLnI_6p21.1l	L1FLnI	LINE	A2780	AZA	145.753	-0.301498
L1FLnI_15q24.3h	L1FLnI	LINE	A2780	AZA	166.638	-0.0861088
L1FLnI_6q27u	L1FLnI	LINE	A2780	AZA	172.207	-0.241626
L1FLnI_7p21.1m	L1FLnI	LINE	A2780	AZA	132.148	-0.686458
L1FLnI_3q22.2a	L1FLnI	LINE	A2780	AZA	175.322	0.140424
L1FLnI_3p11.1g	L1FLnI	LINE	A2780	AZA	146.327	-0.50837
L1FLnI_5q33.1b	L1FLnI	LINE	A2780	AZA	147.43	0.0487716
L1FLI_16p12.3b	L1FLI	LINE	A2780	AZA	156.35	0.106105
L1FLnI_11q24.3f	L1FLnI	LINE	A2780	AZA	150.126	-0.3027
L1FLnI_4q13.3aa	L1FLnI	LINE	A2780	AZA	187.269	0.25717
L1FLnI_15q21.3m	L1FLnI	LINE	A2780	AZA	150.185	-0.315192
L1FLnI_11p12ea	L1FLnI	LINE	A2780	AZA	150.475	-0.061344
L1FLnI_5q35.1d	L1FLnI	LINE	A2780	AZA	147.693	-0.248016
L1FLnI_2p22.1i	L1FLnI	LINE	A2780	AZA	184.037	0.40406
L1FLnI_6p25.1e	L1FLnI	LINE	A2780	AZA	158.759	-0.0343095
L1FLnI_4q25p	L1FLnI	LINE	A2780	AZA	126.606	-0.92738
L1FLnI_11q13.5c	L1FLnI	LINE	A2780	AZA	161.868	0.297793
L1FLnI_15q21.1h	L1FLnI	LINE	A2780	AZA	110.727	-1.13683
L1FLnI_3q22.3f	L1FLnI	LINE	A2780	AZA	132.992	-0.316655
L1FLnI_6p22.3n	L1FLnI	LINE	A2780	AZA	324.352	1.31213
L1FLnI_14q23.3q	L1FLnI	LINE	A2780	AZA	162.519	0.0650622
L1FLnI_3q21.3b	L1FLnI	LINE	A2780	AZA	106.277	-1.36987
L1FLnI_8q21.3da	L1FLnI	LINE	A2780	AZA	248.816	0.942008
L1FLnI_4q24za	L1FLnI	LINE	A2780	AZA	123.198	-0.659255
L1FLnI_Xp21.3o	L1FLnI	LINE	A2780	AZA	136.052	-0.548832
L1FLnI_2q33.1b	L1FLnI	LINE	A2780	AZA	144.798	-0.176173
L1FLnI_11q21r	L1FLnI	LINE	A2780	AZA	152.641	-0.285798
L1FLnI_8q21.11p	L1FLnI	LINE	A2780	AZA	166.44	-0.211797
L1FLnI_9q31.1d	L1FLnI	LINE	A2780	AZA	136.867	-0.242223
L1FLI_6q16.3	L1FLI	LINE	A2780	AZA	200.375	0.395207
L1FLnI_1p32.3e	L1FLnI	LINE	A2780	AZA	130.784	-0.491751
L1FLnI_3q22.3h	L1FLnI	LINE	A2780	AZA	228.971	1.34887
L1FLnI_11q13.4d	L1FLnI	LINE	A2780	AZA	144.888	-0.434036
L1FLnI_1q42.3a	L1FLnI	LINE	A2780	AZA	161.586	0.122357
L1FLnI_11p13x	L1FLnI	LINE	A2780	AZA	148.859	-0.0840938
L1FLnI_Xq22.1cb	L1FLnI	LINE	A2780	AZA	132.478	-0.39369
L1FLnI_15q26.1c	L1FLnI	LINE	A2780	AZA	176.445	0.332134
L1FLnI_13q12.11g	L1FLnI	LINE	A2780	AZA	146.475	-0.157188
L1FLnI_18q21.1i	L1FLnI	LINE	A2780	AZA	136.207	-0.0992405
L1FLnI_11q22.2b	L1FLnI	LINE	A2780	AZA	151.767	-0.0264114
L1FLnI_4q28.2h	L1FLnI	LINE	A2780	AZA	137.55	-0.127497
L1FLnI_3p24.1q	L1FLnI	LINE	A2780	AZA	135.74	-0.496731
L1FLnI_2q37.1i	L1FLnI	LINE	A2780	AZA	96.2978	-2.75975
L1FLnI_13q34c	L1FLnI	LINE	A2780	AZA	154.136	-0.0372996
L1FLnI_9p22.3k	L1FLnI	LINE	A2780	AZA	105.856	-0.790031
L1FLnI_12q12s	L1FLnI	LINE	A2780	AZA	139.33	-0.26808
L1FLnI_7p14.3q	L1FLnI	LINE	A2780	AZA	129.043	-0.347514
L1FLnI_14q23.1h	L1FLnI	LINE	A2780	AZA	144.792	-0.217453
L1FLnI_10q24.2g	L1FLnI	LINE	A2780	AZA	126.367	-0.80236
L1FLnI_7q32.3a	L1FLnI	LINE	A2780	AZA	140.452	-0.126634
L1FLnI_5q14.1o	L1FLnI	LINE	A2780	AZA	116.496	-1.09187
L1FLnI_2p14k	L1FLnI	LINE	A2780	AZA	99.4008	-1.36871
L1FLnI_13q14.2p	L1FLnI	LINE	A2780	AZA	150.373	-0.132097
L1FLnI_6q16.3ja	L1FLnI	LINE	A2780	AZA	212.607	0.420981
L1FLI_5q31.2	L1FLI	LINE	A2780	AZA	133.12	-0.587099
L1FLnI_11p15.4ha	L1FLnI	LINE	A2780	AZA	154.027	-0.132097
L1FLnI_6p21.1k	L1FLnI	LINE	A2780	AZA	141.489	-0.25548
L1FLnI_1q31.1t	L1FLnI	LINE	A2780	AZA	138.439	-0.412637
L1FLnI_7q22.3g	L1FLnI	LINE	A2780	AZA	140.073	-0.301605
L1FLnI_10q21.1c	L1FLnI	LINE	A2780	AZA	106.963	-0.906743
L1FLnI_Xp11.23d	L1FLnI	LINE	A2780	AZA	119.731	-0.69894
L1FLnI_14q21.2f	L1FLnI	LINE	A2780	AZA	155.767	-0.113979
L1FLnI_11q14.2k	L1FLnI	LINE	A2780	AZA	160.726	0.123416
L1FLnI_8q24.3c	L1FLnI	LINE	A2780	AZA	153.499	0.169045
L1FLnI_4q28.1c	L1FLnI	LINE	A2780	AZA	150.216	-0.155306
L1FLnI_2p22.1j	L1FLnI	LINE	A2780	AZA	121.959	-0.406267
L1FLnI_3p24.1t	L1FLnI	LINE	A2780	AZA	123.256	-0.399869
L1FLnI_3q23f	L1FLnI	LINE	A2780	AZA	113.555	-0.668685
L1FLnI_8q24.21n	L1FLnI	LINE	A2780	AZA	172.769	0.232398
L1FLnI_Xp11.21rb	L1FLnI	LINE	A2780	AZA	110.042	-0.893976
L1FLnI_5q13.3b	L1FLnI	LINE	A2780	AZA	171.984	0.248103
L1FLnI_2q33.1t	L1FLnI	LINE	A2780	AZA	133.87	-0.204409
L1FLnI_8q24.22g	L1FLnI	LINE	A2780	AZA	187.907	0.620912
L1FLnI_11q14.3r	L1FLnI	LINE	A2780	AZA	107.027	-0.908014
L1FLnI_11p15.2g	L1FLnI	LINE	A2780	AZA	155.957	0.0607323
L1FLnI_11q14.2j	L1FLnI	LINE	A2780	AZA	181.043	0.24528
L1FLnI_Xp11.21ob	L1FLnI	LINE	A2780	AZA	122.182	-0.330404
L1FLnI_Xq13.2x	L1FLnI	LINE	A2780	AZA	125.35	-0.507282
L1FLnI_3q26.1ma	L1FLnI	LINE	A2780	AZA	151.637	-0.0818453
L1FLnI_10q24.2f	L1FLnI	LINE	A2780	AZA	124.999	-0.874611
L1FLnI_8q22.2h	L1FLnI	LINE	A2780	AZA	169.892	0.306557
L1FLnI_3p14.3k	L1FLnI	LINE	A2780	AZA	125.165	-0.614969
L1FLnI_16q23.2g	L1FLnI	LINE	A2780	AZA	152.857	0.115191
L1FLnI_7q34b	L1FLnI	LINE	A2780	AZA	136.011	-0.249663
L1FLnI_4q12eb	L1FLnI	LINE	A2780	AZA	124.671	-0.243119
L1FLnI_5q14.1x	L1FLnI	LINE	A2780	AZA	120.647	-0.441448
L1FLnI_6q22.31w	L1FLnI	LINE	A2780	AZA	200.527	0.610748
L1FLnI_12q13.11j	L1FLnI	LINE	A2780	AZA	147.097	-0.104413
L1FLnI_8q22.3s	L1FLnI	LINE	A2780	AZA	103.992	-1.24984
L1FLnI_10q23.33c	L1FLnI	LINE	A2780	AZA	126.214	-0.465572
L1FLnI_12p13.32d	L1FLnI	LINE	A2780	AZA	134.413	-0.216769
L1FLnI_12q12g	L1FLnI	LINE	A2780	AZA	278.876	1.20644
L1FLnI_9q33.2c	L1FLnI	LINE	A2780	AZA	158.602	0.110396
L1FLnI_3q22.2b	L1FLnI	LINE	A2780	AZA	129.539	-0.165239
L1FLnI_Xq13.2ia	L1FLnI	LINE	A2780	AZA	171.399	0.444815
L1FLnI_13q31.1t	L1FLnI	LINE	A2780	AZA	244.292	1.09597
L1FLnI_14q21.2ba	L1FLnI	LINE	A2780	AZA	103.897	-0.743567
L1FLnI_6q16.3ka	L1FLnI	LINE	A2780	AZA	209.101	0.363897
L1FLnI_6p11.2d	L1FLnI	LINE	A2780	AZA	138.893	0.00385248
L1ORF2_6q16.3	L1ORF2	LINE	A2780	AZA	183.197	0.21484
L1FLnI_7q34c	L1FLnI	LINE	A2780	AZA	131.696	-0.126851
L1FLnI_2q37.1f	L1FLnI	LINE	A2780	AZA	150.909	0.0704501
L1FLnI_10q21.3g	L1FLnI	LINE	A2780	AZA	122.102	-0.393174
L1FLnI_8q22.3o	L1FLnI	LINE	A2780	AZA	106.112	-1.00086
L1FLnI_5q14.3nb	L1FLnI	LINE	A2780	AZA	169.43	-0.216524
L1FLnI_13q21.33a	L1FLnI	LINE	A2780	AZA	103.591	-1.10667
L1FLnI_11q14.3t	L1FLnI	LINE	A2780	AZA	96.0873	-1.314
L1FLnI_7q22.1a	L1FLnI	LINE	A2780	AZA	109.61	-0.891775
L1FLnI_4q12ha	L1FLnI	LINE	A2780	AZA	145.043	-0.189681
L1FLnI_3q22.3b	L1FLnI	LINE	A2780	AZA	143.878	0.0533621
L1FLnI_2p12ea	L1FLnI	LINE	A2780	AZA	121.092	-0.996845
L1FLnI_9q22.32a	L1FLnI	LINE	A2780	AZA	82.4535	-1.30718
L1FLnI_4q24ja	L1FLnI	LINE	A2780	AZA	111.56	-1.09306
L1FLnI_15q14d	L1FLnI	LINE	A2780	AZA	188.497	0.350431
L1FLnI_10q24.2e	L1FLnI	LINE	A2780	AZA	101.389	-0.696261
L1FLnI_1q25.1o	L1FLnI	LINE	A2780	AZA	156.595	0.348098
L1FLnI_2p24.1ba	L1FLnI	LINE	A2780	AZA	145.241	0.0850639
L1FLnI_5q21.3q	L1FLnI	LINE	A2780	AZA	114.83	-0.562264
L1FLnI_3p14.1p	L1FLnI	LINE	A2780	AZA	124.398	-0.279092
L1FLnI_1p34.1a	L1FLnI	LINE	A2780	AZA	124.562	-0.209383
L1FLnI_4q28.1ka	L1FLnI	LINE	A2780	AZA	137.229	-0.1622
L1FLnI_5q21.2a	L1FLnI	LINE	A2780	AZA	103.057	-0.45465
L1FLnI_3q21.2a	L1FLnI	LINE	A2780	AZA	116.472	-1.25795
L1FLnI_3p26.1f	L1FLnI	LINE	A2780	AZA	122.11	-0.72093
L1FLnI_Xq11.2ma	L1FLnI	LINE	A2780	AZA	104.059	-0.470951
L1FLnI_5p13.2ba	L1FLnI	LINE	A2780	AZA	120.815	-0.497167
L1FLnI_15q24.3c	L1FLnI	LINE	A2780	AZA	101.736	-0.962246
L1FLI_22q12.1	L1FLI	LINE	A2780	AZA	117.218	-0.265568
L1FLnI_16q12.2d	L1FLnI	LINE	A2780	AZA	118.307	-0.680605
L1FLnI_Xq11.1t	L1FLnI	LINE	A2780	AZA	126.763	-0.273013
L1FLnI_1q25.3a	L1FLnI	LINE	A2780	AZA	145.241	0.0634142
L1FLnI_2p23.3c	L1FLnI	LINE	A2780	AZA	128.545	-0.107954
L1FLnI_6q15i	L1FLnI	LINE	A2780	AZA	170.208	0.314173
L1FLnI_10p12.33a	L1FLnI	LINE	A2780	AZA	130.6	-0.119972
L1FLnI_2q23.1k	L1FLnI	LINE	A2780	AZA	137.335	-0.0177915
L1FLnI_15q24.3d	L1FLnI	LINE	A2780	AZA	101.32	-0.84376
L1FLnI_4q32.1ba	L1FLnI	LINE	A2780	AZA	102.323	-1.75887
L1FLnI_2q32.1fa	L1FLnI	LINE	A2780	AZA	143.094	0.0731999
L1FLnI_2q37.3d	L1FLnI	LINE	A2780	AZA	102.949	-0.652177
L1FLnI_8q21.11t	L1FLnI	LINE	A2780	AZA	151.589	-0.0106316
L1FLnI_7p22.1f	L1FLnI	LINE	A2780	AZA	122.756	-0.201375
L1FLnI_11p13d	L1FLnI	LINE	A2780	AZA	124.26	-0.334642
L1FLnI_9q21.12h	L1FLnI	LINE	A2780	AZA	124.053	-0.398067
L1FLnI_10p12.31a	L1FLnI	LINE	A2780	AZA	141.434	0.0876271
L1FLnI_3q25.32l	L1FLnI	LINE	A2780	AZA	126.593	-0.194144
L1FLnI_3p22.1z	L1FLnI	LINE	A2780	AZA	129.383	-0.0463904
L1FLnI_Xp11.21pb	L1FLnI	LINE	A2780	AZA	96.6433	-0.474251
L1FLnI_13q14.2t	L1FLnI	LINE	A2780	AZA	122.28	0.0403215
L1FLnI_4q22.1a	L1FLnI	LINE	A2780	AZA	124.726	0.144658
L1FLnI_3q22.3e	L1FLnI	LINE	A2780	AZA	140.802	0.25964
L1FLnI_1p22.1l	L1FLnI	LINE	A2780	AZA	95.5942	-0.905101
L1FLnI_4q35.2j	L1FLnI	LINE	A2780	AZA	105.911	-0.519451
L1FLnI_2p14a	L1FLnI	LINE	A2780	AZA	126.926	-0.215445
L1FLnI_11p15.4da	L1FLnI	LINE	A2780	AZA	109.506	-0.730017
L1FLnI_4q22.1l	L1FLnI	LINE	A2780	AZA	117.916	-0.13138
L1FLnI_2q34ba	L1FLnI	LINE	A2780	AZA	132.725	-0.00650654
L1FLnI_4q24ab	L1FLnI	LINE	A2780	AZA	114.518	-0.459679
L1FLnI_14q21.1wa	L1FLnI	LINE	A2780	AZA	130.059	-0.124076
L1FLnI_5p13.2ca	L1FLnI	LINE	A2780	AZA	116.191	-0.229945
L1FLnI_8q11.21g	L1FLnI	LINE	A2780	AZA	128.335	-0.290066
L1FLnI_6p22.2b	L1FLnI	LINE	A2780	AZA	98.576	-0.577867
L1FLnI_1q21.1c	L1FLnI	LINE	A2780	AZA	91.7326	-1.45233
L1FLnI_7q36.3c	L1FLnI	LINE	A2780	AZA	138.072	0.0860834
L1FLnI_Xq11.1s	L1FLnI	LINE	A2780	AZA	122.926	0.0330901
L1FLnI_12q13.11e	L1FLnI	LINE	A2780	AZA	116.386	-0.109354
L1FLnI_12p11.22b	L1FLnI	LINE	A2780	AZA	131.15	-0.0170961
L1FLnI_5q31.1c	L1FLnI	LINE	A2780	AZA	133.83	0.045368
L1FLnI_3q22.3y	L1FLnI	LINE	A2780	AZA	127.651	-0.171646
L1FLnI_15q26.3e	L1FLnI	LINE	A2780	AZA	119.788	-0.149976
L1FLnI_1q25.3l	L1FLnI	LINE	A2780	AZA	92.9654	-1.12196
L1FLnI_1q31.1x	L1FLnI	LINE	A2780	AZA	133.916	0.0844891
L1FLnI_2p14q	L1FLnI	LINE	A2780	AZA	107.243	-1.17854
L1FLnI_10q22.3h	L1FLnI	LINE	A2780	AZA	152.887	0.532476
L1FLnI_4q12e	L1FLnI	LINE	A2780	AZA	129.88	0.496408
L1FLnI_3p14.2o	L1FLnI	LINE	A2780	AZA	101.273	-1.22241
L1FLnI_1p31.3c	L1FLnI	LINE	A2780	AZA	106.39	-0.657626
L1FLnI_21q21.1f	L1FLnI	LINE	A2780	AZA	130.62	0.0255165
L1FLnI_5p13.1b	L1FLnI	LINE	A2780	AZA	119.858	-0.170444
L1FLnI_15q15.3d	L1FLnI	LINE	A2780	AZA	134.637	-0.0718798
L1FLnI_11p15.4y	L1FLnI	LINE	A2780	AZA	123.077	-0.442247
L1FLnI_4q13.3ba	L1FLnI	LINE	A2780	AZA	147.359	0.17748
L1FLnI_9q21.33i	L1FLnI	LINE	A2780	AZA	130.025	0.0904559
L1FLnI_1p33m	L1FLnI	LINE	A2780	AZA	118.632	-0.268625
L1FLnI_Xq11.2ta	L1FLnI	LINE	A2780	AZA	99.2487	-0.68366
L1FLnI_2q23.1d	L1FLnI	LINE	A2780	AZA	153.663	0.367684
L1FLnI_3q29i	L1FLnI	LINE	A2780	AZA	105.818	-0.582732
L1FLnI_12q13.11d	L1FLnI	LINE	A2780	AZA	99.8128	-0.214677
L1FLnI_10q21.3b	L1FLnI	LINE	A2780	AZA	110.396	-0.155176
L1FLnI_Xp22.2j	L1FLnI	LINE	A2780	AZA	114.061	-0.350574
L1FLnI_6p22.3l	L1FLnI	LINE	A2780	AZA	235.927	1.25107
L1FLnI_21q22.3b	L1FLnI	LINE	A2780	AZA	134.873	0.534678
L1FLnI_8p22f	L1FLnI	LINE	A2780	AZA	141.45	0.31549
L1FLnI_Xq28ta	L1FLnI	LINE	A2780	AZA	100.289	-0.58358
L1FLnI_5p15.2c	L1FLnI	LINE	A2780	AZA	113.183	-0.214348
L1FLnI_5q14.1f	L1FLnI	LINE	A2780	AZA	130.095	0.287779
L1FLnI_Xq11.2na	L1FLnI	LINE	A2780	AZA	114.142	-0.145731
L1FLnI_2p12l	L1FLnI	LINE	A2780	AZA	121.896	0.112337
L1FLnI_9p23d	L1FLnI	LINE	A2780	AZA	127.134	0.00924308
L1FLnI_8q24.12o	L1FLnI	LINE	A2780	AZA	99.287	-0.370604
L1FLnI_Xq22.3g	L1FLnI	LINE	A2780	AZA	82.891	-0.956377
L1FLnI_11q21n	L1FLnI	LINE	A2780	AZA	97.2773	-0.328347
L1FLnI_8q23.1y	L1FLnI	LINE	A2780	AZA	171.983	0.204776
L1FLnI_10q24.31a	L1FLnI	LINE	A2780	AZA	80.1101	-1.21417
L1FLnI_15q25.3a	L1FLnI	LINE	A2780	AZA	104.954	-0.3627
L1FLnI_4q22.1p	L1FLnI	LINE	A2780	AZA	102.179	-0.671649
L1FLnI_13q13.3b	L1FLnI	LINE	A2780	AZA	103.331	-0.38994
L1FLnI_14q24.1e	L1FLnI	LINE	A2780	AZA	148.169	0.499028
L1FLnI_2q31.1t	L1FLnI	LINE	A2780	AZA	114.581	-0.0859343
L1FLnI_10q23.31m	L1FLnI	LINE	A2780	AZA	110.927	-0.129877
L1FLnI_2q24.3v	L1FLnI	LINE	A2780	AZA	135.094	0.303632
L1FLnI_7p14.1k	L1FLnI	LINE	A2780	AZA	100.828	-0.237937
L1FLnI_15q24.3e	L1FLnI	LINE	A2780	AZA	97.5575	-0.520336
L1FLnI_2p23.3d	L1FLnI	LINE	A2780	AZA	97.617	-0.539965
L1FLnI_2p13.2f	L1FLnI	LINE	A2780	AZA	129.212	-0.0859342
L1FLnI_4q23e	L1FLnI	LINE	A2780	AZA	113.224	-0.592514
L1FLnI_5q12.3k	L1FLnI	LINE	A2780	AZA	110.545	-0.182639
L1FLnI_Xq22.3l	L1FLnI	LINE	A2780	AZA	116.82	-0.229944
L1FLnI_5q23.3c	L1FLnI	LINE	A2780	AZA	128.342	0.0544238
L1FLnI_5q15n	L1FLnI	LINE	A2780	AZA	103.846	-0.270817
L1FLnI_15q15.3a	L1FLnI	LINE	A2780	AZA	101.327	-0.504306
L1FLnI_3p21.2d	L1FLnI	LINE	A2780	AZA	95.4255	-0.465832
L1FLnI_1q31.1v	L1FLnI	LINE	A2780	AZA	98.5955	-0.409979
L1FLnI_1p13.2e	L1FLnI	LINE	A2780	AZA	118.183	-0.356208
L1FLnI_4q12la	L1FLnI	LINE	A2780	AZA	86.1447	-1.95886
L1FLnI_4q28.1a	L1FLnI	LINE	A2780	AZA	124.363	0.236836
L1FLnI_16q12.1d	L1FLnI	LINE	A2780	AZA	94.5332	-0.348125
L1FLnI_3q25.2j	L1FLnI	LINE	A2780	AZA	114.399	-0.0110497
L1FLnI_10q24.2a	L1FLnI	LINE	A2780	AZA	124.583	0.221313
L1FLnI_5q12.1n	L1FLnI	LINE	A2780	AZA	99.1109	-0.653155
L1FLnI_2q31.1i	L1FLnI	LINE	A2780	AZA	124.71	0.109805
L1FLnI_15q23k	L1FLnI	LINE	A2780	AZA	104.864	-0.127694
L1FLnI_Xq13.1ia	L1FLnI	LINE	A2780	AZA	106.976	-0.119521
L1FLnI_1q31.1s	L1FLnI	LINE	A2780	AZA	110.793	-0.331824
L1FLnI_Xq11.1u	L1FLnI	LINE	A2780	AZA	107.273	-0.205422
L1FLnI_13q32.1d	L1FLnI	LINE	A2780	AZA	90.5722	-0.726958
L1FLnI_1q24.2k	L1FLnI	LINE	A2780	AZA	109.494	0.0136127
L1FLnI_3q13.33w	L1FLnI	LINE	A2780	AZA	107.508	0.0819996
L1FLnI_10p11.22e	L1FLnI	LINE	A2780	AZA	121.109	0.315797
L1FLnI_8q22.2i	L1FLnI	LINE	A2780	AZA	120.503	0.108472
L1FLnI_15q25.3c	L1FLnI	LINE	A2780	AZA	124.498	0.0413574
L1FLnI_1q44h	L1FLnI	LINE	A2780	AZA	132.906	0.0136124
L1FLnI_12q12ia	L1FLnI	LINE	A2780	AZA	132.047	0.360535
L1FLnI_2q32.1ra	L1FLnI	LINE	A2780	AZA	137.916	0.412243
L1FLnI_7q11.23d	L1FLnI	LINE	A2780	AZA	112.862	-0.00636108
L1FLnI_15q21.2a	L1FLnI	LINE	A2780	AZA	109.778	-0.125414
L1FLnI_3q13.2m	L1FLnI	LINE	A2780	AZA	102.521	-0.11705
L1FLnI_4q24ta	L1FLnI	LINE	A2780	AZA	98.6553	-0.611815
L1FLnI_Xq21.1fc	L1FLnI	LINE	A2780	AZA	137.759	0.481486
L1FLnI_14q22.1j	L1FLnI	LINE	A2780	AZA	152.978	0.340888
L1FLnI_12p13.31k	L1FLnI	LINE	A2780	AZA	96.1103	-0.740905
L1FLnI_12q14.1la	L1FLnI	LINE	A2780	AZA	123.762	0.142025
L1FLnI_3p12.2h	L1FLnI	LINE	A2780	AZA	152.4	0.218646
L1FLnI_3q22.3c	L1FLnI	LINE	A2780	AZA	110.649	-0.179904
L1FLnI_5p13.2b	L1FLnI	LINE	A2780	AZA	89.1391	-0.781354
L1FLnI_Xq13.3h	L1FLnI	LINE	A2780	AZA	89.2356	-0.756691
L1FLnI_11p15.2i	L1FLnI	LINE	A2780	AZA	95.9007	-0.756691
L1FLnI_3p21.2c	L1FLnI	LINE	A2780	AZA	117.216	0.214666
L1FLnI_19p12v	L1FLnI	LINE	A2780	AZA	77.307	-1.04586
L1FLnI_13q12.11h	L1FLnI	LINE	A2780	AZA	112.695	-0.382896
L1FLnI_10q24.2d	L1FLnI	LINE	A2780	AZA	76.3818	-1.30889
L1FLnI_2p22.2d	L1FLnI	LINE	A2780	AZA	117.012	-0.0916653
L1FLnI_12q13.11f	L1FLnI	LINE	A2780	AZA	98.1654	0.03595
L1FLnI_6p25.3c	L1FLnI	LINE	A2780	AZA	130.86	0.260381
L1FLnI_4q28.2a	L1FLnI	LINE	A2780	AZA	89.395	-0.668065
L1FLnI_18q21.1j	L1FLnI	LINE	A2780	AZA	115.41	0.172154
L1FLnI_7q32.2c	L1FLnI	LINE	A2780	AZA	108.136	0.0359498
L1FLnI_3p11.1n	L1FLnI	LINE	A2780	AZA	100.901	-0.374334
L1FLnI_9p24.1f	L1FLnI	LINE	A2780	AZA	242.005	1.73968
L1FLnI_4p16.2m	L1FLnI	LINE	A2780	AZA	92.5909	-0.472514
L1FLnI_15q14b	L1FLnI	LINE	A2780	AZA	98.1428	-0.121796
L1FLnI_10p11.21j	L1FLnI	LINE	A2780	AZA	75.2402	-0.731004
L1FLnI_5q14.1g	L1FLnI	LINE	A2780	AZA	116.626	0.141238
L1FLnI_5q11.2h	L1FLnI	LINE	A2780	AZA	88.5238	-0.913208
L1FLnI_1q24.2j	L1FLnI	LINE	A2780	AZA	98.7621	-0.0050709
L1FLnI_14q12ua	L1FLnI	LINE	A2780	AZA	85.6042	-0.698092
L1FLnI_5q22.1j	L1FLnI	LINE	A2780	AZA	115.471	0.0532273
L1FLnI_3q25.33h	L1FLnI	LINE	A2780	AZA	99.9185	-0.136835
L1FLnI_7q34a	L1FLnI	LINE	A2780	AZA	112.663	-0.203949
L1FLnI_22q12.1d	L1FLnI	LINE	A2780	AZA	91.2854	-0.153323
L1FLnI_14q21.1r	L1FLnI	LINE	A2780	AZA	94.0436	-0.738285
L1FLnI_11p14.1e	L1FLnI	LINE	A2780	AZA	115.699	-0.104414
L1FLnI_9p21.3d	L1FLnI	LINE	A2780	AZA	145.946	0.448127
L1FLnI_9p24.1g	L1FLnI	LINE	A2780	AZA	163.884	0.958322
L1FLnI_9q31.1c	L1FLnI	LINE	A2780	AZA	88.328	-0.565128
L1FLnI_15q23j	L1FLnI	LINE	A2780	AZA	148.012	0.821895
L1FLnI_14q12sa	L1FLnI	LINE	A2780	AZA	114.19	0.0707148
L1FLnI_13q13.3a	L1FLnI	LINE	A2780	AZA	87.2609	-0.534278
L1FLnI_4q28.3z	L1FLnI	LINE	A2780	AZA	101.528	-0.0240839
L1FLnI_5q31.2d	L1FLnI	LINE	A2780	AZA	112.514	0.215743
L1FLnI_3p14.2s	L1FLnI	LINE	A2780	AZA	99.7052	-0.671781
L1FLnI_6q13n	L1FLnI	LINE	A2780	AZA	107.267	0.116706
L1FLnI_6p11.2e	L1FLnI	LINE	A2780	AZA	105.609	-0.062
L1FLnI_3q11.2y	L1FLnI	LINE	A2780	AZA	70.7735	-1.17747
L1FLnI_12q13.11i	L1FLnI	LINE	A2780	AZA	96.213	-0.788433
L1FLnI_Xq25dc	L1FLnI	LINE	A2780	AZA	83.575	-0.897367
L1FLnI_13q13.3t	L1FLnI	LINE	A2780	AZA	101.886	0.116706
L1FLI_3q22.3	L1FLI	LINE	A2780	AZA	101.95	-0.284391
L1FLnI_14q23.1ba	L1FLnI	LINE	A2780	AZA	83.5444	-0.411113
L1FLnI_7p21.2h	L1FLnI	LINE	A2780	AZA	122.3	0.125639
L1FLnI_1p21.1a	L1FLnI	LINE	A2780	AZA	82.9061	-1.06901
L1FLnI_Xq13.3z	L1FLnI	LINE	A2780	AZA	69.4073	-1.43157
L1FLnI_5p13.2aa	L1FLnI	LINE	A2780	AZA	107.394	0.0538483
L1FLnI_2p16.2g	L1FLnI	LINE	A2780	AZA	83.1057	-0.851431
L1FLnI_Xp11.21u	L1FLnI	LINE	A2780	AZA	78.8992	-0.879446
L1FLnI_2p12fa	L1FLnI	LINE	A2780	AZA	88.1154	-0.718982
L1FLnI_18q12.1x	L1FLnI	LINE	A2780	AZA	95.6865	-0.718982
L1FLnI_22q11.23a	L1FLnI	LINE	A2780	AZA	104.652	-0.285086
L1FLnI_2p24.3s	L1FLnI	LINE	A2780	AZA	96.5164	-0.202977
L1FLnI_Xq11.1r	L1FLnI	LINE	A2780	AZA	109.09	0.129598
L1FLnI_Xq13.2ga	L1FLnI	LINE	A2780	AZA	120.288	0.501567
L1FLnI_1p13.2k	L1FLnI	LINE	A2780	AZA	103.062	-0.185275
L1FLnI_8q11.23l	L1FLnI	LINE	A2780	AZA	112.676	0.0270285
L1FLnI_8q22.1k	L1FLnI	LINE	A2780	AZA	99.8247	-0.285798
L1FLnI_2q32.2e	L1FLnI	LINE	A2780	AZA	95.2639	-0.511357
L1FLnI_2p13.2g	L1FLnI	LINE	A2780	AZA	109.28	0.247634
L1FLnI_18p11.31a	L1FLnI	LINE	A2780	AZA	132.891	0.532364
L1FLnI_19p13.2d	L1FLnI	LINE	A2780	AZA	83.1867	-0.861296
L1FLnI_1p21.3b	L1FLnI	LINE	A2780	AZA	159.736	0.910063
L1FLnI_20p11.21u	L1FLnI	LINE	A2780	AZA	89.0148	-0.641922
L1FLnI_5q13.3s	L1FLnI	LINE	A2780	AZA	124.052	0.625182
L1FLnI_4p15.2y	L1FLnI	LINE	A2780	AZA	101.59	-0.220784
L1FLnI_8q22.2m	L1FLnI	LINE	A2780	AZA	106.24	0.161935
L1FLnI_3p21.33b	L1FLnI	LINE	A2780	AZA	74.2317	-0.682455
L1FLnI_13q32.1g	L1FLnI	LINE	A2780	AZA	125.512	0.403517
L1FLnI_15q23a	L1FLnI	LINE	A2780	AZA	72.6869	-0.991783
L1FLnI_2p22.2f	L1FLnI	LINE	A2780	AZA	92.0514	-1.02349
L1FLnI_Xq13.2aa	L1FLnI	LINE	A2780	AZA	88.8737	-0.733986
L1FLnI_7q31.33h	L1FLnI	LINE	A2780	AZA	96.8067	0.123288
L1FLnI_1p22.1f	L1FLnI	LINE	A2780	AZA	111.361	0.262115
L1FLnI_6q24.3g	L1FLnI	LINE	A2780	AZA	103.189	0.0174928
L1FLnI_Xq13.1ja	L1FLnI	LINE	A2780	AZA	97.0648	-0.267912
L1FLnI_11p13l	L1FLnI	LINE	A2780	AZA	92.1728	-0.229944
L1FLnI_6q21b	L1FLnI	LINE	A2780	AZA	95.3568	-0.139179
L1FLnI_6q25.3l	L1FLnI	LINE	A2780	AZA	94.2597	-0.267912
L1FLnI_18q21.31f	L1FLnI	LINE	A2780	AZA	94.2609	-0.474363
L1FLnI_11q22.3b	L1FLnI	LINE	A2780	AZA	103.789	-0.326806
L1FLnI_14q23.3n	L1FLnI	LINE	A2780	AZA	96.6738	-0.0704661
L1FLnI_14q21.1oa	L1FLnI	LINE	A2780	AZA	108.357	-0.0537877
L1FLnI_3p12.3m	L1FLnI	LINE	A2780	AZA	97.4617	-0.248804
L1FLnI_9p22.2b	L1FLnI	LINE	A2780	AZA	108.807	0.0204621
L1FLnI_14q24.1a	L1FLnI	LINE	A2780	AZA	89.7928	0.00452101
L1FLnI_21q21.3b	L1FLnI	LINE	A2780	AZA	85.2001	-0.556594
L1FLnI_1p21.2m	L1FLnI	LINE	A2780	AZA	112.614	0.280852
L1FLnI_7q21.3l	L1FLnI	LINE	A2780	AZA	83.968	-0.654442
L1FLnI_11q14.3m	L1FLnI	LINE	A2780	AZA	196.519	1.16372
L1FLnI_2q14.1b	L1FLnI	LINE	A2780	AZA	99.3857	0.263595
L1FLnI_6q16.3ea	L1FLnI	LINE	A2780	AZA	108.553	0.194553
L1FLnI_2q14.1ga	L1FLnI	LINE	A2780	AZA	81.9371	-0.696511
L1FLnI_9p21.3h	L1FLnI	LINE	A2780	AZA	89.9624	-0.249053
L1FLnI_3p14.3p	L1FLnI	LINE	A2780	AZA	104.333	0.277015
L1FLnI_1q31.3r	L1FLnI	LINE	A2780	AZA	114.297	0.10709
L1FLnI_7q31.1wa	L1FLnI	LINE	A2780	AZA	87.1997	-0.455504
L1FLnI_2q32.1ba	L1FLnI	LINE	A2780	AZA	123.412	0.588217
L1FLnI_8q11.21d	L1FLnI	LINE	A2780	AZA	107.713	-0.155944
L1FLnI_4q28.2j	L1FLnI	LINE	A2780	AZA	96.7325	0.0299226
L1FLnI_14q11.2c	L1FLnI	LINE	A2780	AZA	86.652	-0.369347
L1FLnI_1p33l	L1FLnI	LINE	A2780	AZA	83.6614	-0.834014
L1FLnI_6q24.2j	L1FLnI	LINE	A2780	AZA	97.5208	0.0552126
L1FLnI_18q12.1w	L1FLnI	LINE	A2780	AZA	96.7105	-0.0420844
L1FLnI_7p21.1g	L1FLnI	LINE	A2780	AZA	115.188	0.299835
L1FLnI_20p12.1i	L1FLnI	LINE	A2780	AZA	86.9963	-0.635458
L1FLnI_Xq21.1if	L1FLnI	LINE	A2780	AZA	101.164	-0.0158199
L1FLnI_11q14.2a	L1FLnI	LINE	A2780	AZA	101.948	-0.0158198
L1FLnI_2q35g	L1FLnI	LINE	A2780	AZA	107.898	0.269157
L1FLnI_14q21.2b	L1FLnI	LINE	A2780	AZA	95.0018	-0.288838
L1FLnI_6p11.2f	L1FLnI	LINE	A2780	AZA	105.624	0.199448
L1FLnI_2q11.2m	L1FLnI	LINE	A2780	AZA	83.2724	-0.786337
L1FLnI_7p14.3d	L1FLnI	LINE	A2780	AZA	82.6601	-0.288837
L1FLnI_4q12ca	L1FLnI	LINE	A2780	AZA	117.867	0.251326
L1FLnI_Xq21.33la	L1FLnI	LINE	A2780	AZA	88.3688	-0.566469
L1FLnI_4q32.3fa	L1FLnI	LINE	A2780	AZA	78.1243	-0.711476
L1FLnI_3q25.2t	L1FLnI	LINE	A2780	AZA	123.339	0.594025
L1FLnI_1q24.2f	L1FLnI	LINE	A2780	AZA	116.911	0.380781
L1FLnI_11q14.2i	L1FLnI	LINE	A2780	AZA	94.2008	-0.0995479
L1FLnI_2p14o	L1FLnI	LINE	A2780	AZA	72.3007	-0.766971
L1FLnI_3q23e	L1FLnI	LINE	A2780	AZA	74.8348	-0.648256
L1FLnI_5q15k	L1FLnI	LINE	A2780	AZA	86.2697	-0.342154
L1FLnI_1q31.1u	L1FLnI	LINE	A2780	AZA	92.1151	-0.522726
L1FLnI_9q33.3a	L1FLnI	LINE	A2780	AZA	71.2206	-1.14421
L1FLnI_7q36.3a	L1FLnI	LINE	A2780	AZA	98.4589	-0.144214
L1FLnI_2p21d	L1FLnI	LINE	A2780	AZA	113.118	0.242808
L1FLnI_4q31.3b	L1FLnI	LINE	A2780	AZA	91.8595	-0.134367
L1FLnI_5q22.2j	L1FLnI	LINE	A2780	AZA	122.131	0.510968
L1FLnI_2q32.2a	L1FLnI	LINE	A2780	AZA	83.9297	-0.290486
L1FLnI_11p12ca	L1FLnI	LINE	A2780	AZA	80.2861	-0.152982
L1FLnI_4q35.1f	L1FLnI	LINE	A2780	AZA	72.4587	-1.02745
L1FLnI_10q24.2j	L1FLnI	LINE	A2780	AZA	75.2627	-0.691847
L1FLnI_4q27u	L1FLnI	LINE	A2780	AZA	97.3352	0.00649604
L1FLnI_4q28.1ma	L1FLnI	LINE	A2780	AZA	73.367	-0.795142
L1FLnI_13q14.2s	L1FLnI	LINE	A2780	AZA	80.5306	-0.602498
L1FLnI_5q15ba	L1FLnI	LINE	A2780	AZA	79.8921	-0.32239
L1FLnI_1q41la	L1FLnI	LINE	A2780	AZA	94.7871	-0.220029
L1FLnI_6p11.2c	L1FLnI	LINE	A2780	AZA	109.531	-0.0348143
L1FLnI_7p21.2n	L1FLnI	LINE	A2780	AZA	108.142	0.016411
L1FLnI_5q22.3w	L1FLnI	LINE	A2780	AZA	115.685	0.394546
L1FLnI_1q24.2g	L1FLnI	LINE	A2780	AZA	90.3216	-0.0779415
L1FLnI_Xq22.3a	L1FLnI	LINE	A2780	AZA	65.3939	-1.49297
L1FLnI_8q22.2l	L1FLnI	LINE	A2780	AZA	103.337	0.224894
L1FLnI_10q22.2d	L1FLnI	LINE	A2780	AZA	93.1057	0.00250143
L1FLnI_4q31.21q	L1FLnI	LINE	A2780	AZA	137.176	0.492827
L1FLnI_14q23.3p	L1FLnI	LINE	A2780	AZA	100.376	0.00250135
L1FLnI_8q22.3r	L1FLnI	LINE	A2780	AZA	65.2176	-1.10441
L1FLnI_12q13.11k	L1FLnI	LINE	A2780	AZA	91.2994	-0.19999
L1FLnI_10q21.1g	L1FLnI	LINE	A2780	AZA	79.3291	-0.521709
L1FLnI_12q13.11v	L1FLnI	LINE	A2780	AZA	101.384	0.27852
L1FLnI_8p22e	L1FLnI	LINE	A2780	AZA	103.483	0.306809
L1FLnI_10q24.2i	L1FLnI	LINE	A2780	AZA	78.6268	-0.624803
L1FLnI_2q32.1ea	L1FLnI	LINE	A2780	AZA	92.6716	0.0465732
L1FLnI_3q21.3d	L1FLnI	LINE	A2780	AZA	80.3522	-1.05776
L1FLnI_1q32.3e	L1FLnI	LINE	A2780	AZA	97.1251	0.0734474
L1FLnI_9q31.2l	L1FLnI	LINE	A2780	AZA	96.7248	-0.121568
L1FLnI_15q25.3d	L1FLnI	LINE	A2780	AZA	90.8308	-0.462605
L1FLnI_11q22.3v	L1FLnI	LINE	A2780	AZA	95.398	0.0567687
L1FLnI_13q14.2v	L1FLnI	LINE	A2780	AZA	84.9779	-0.250702
L1FLnI_6p12.3j	L1FLnI	LINE	A2780	AZA	288.282	2.39899
L1FLnI_Xp21.1a	L1FLnI	LINE	A2780	AZA	88.6798	-0.229944
L1FLnI_1p21.3y	L1FLnI	LINE	A2780	AZA	63.463	-1.07382
L1FLnI_20p13j	L1FLnI	LINE	A2780	AZA	72.9738	-0.631306
L1FLnI_8p12l	L1FLnI	LINE	A2780	AZA	98.7755	-0.199138
L1FLnI_4q31.21t	L1FLnI	LINE	A2780	AZA	111.537	0.471293
L1FLnI_12p13.31n	L1FLnI	LINE	A2780	AZA	81.8685	0.00866669
L1FLnI_4q13.2p	L1FLnI	LINE	A2780	AZA	80.6965	-0.394688
L1FLnI_4q32.1ia	L1FLnI	LINE	A2780	AZA	80.3491	-0.648445
L1FLnI_1q25.1m	L1FLnI	LINE	A2780	AZA	111.135	0.531896
L1FLnI_2q32.1aa	L1FLnI	LINE	A2780	AZA	88.1446	-0.0905413
L1FLnI_2q11.1e	L1FLnI	LINE	A2780	AZA	85.306	-0.198694
L1FLnI_4q31.3a	L1FLnI	LINE	A2780	AZA	95.8549	-0.0611901
L1FLnI_4q31.21p	L1FLnI	LINE	A2780	AZA	99.7171	0.241879
L1FLnI_2q23.1i	L1FLnI	LINE	A2780	AZA	97.2228	-0.305609
L1FLnI_Xq26.3m	L1FLnI	LINE	A2780	AZA	74.9275	-0.713266
L1FLnI_14q21.3a	L1FLnI	LINE	A2780	AZA	70.0605	-1.46999
L1FLnI_7q33i	L1FLnI	LINE	A2780	AZA	80.6027	-0.0611896
L1FLnI_18q12.2k	L1FLnI	LINE	A2780	AZA	90.3699	-0.107954
L1FLnI_10q21.1f	L1FLnI	LINE	A2780	AZA	77.0398	-0.536047
L1FLnI_Xq11.2ua	L1FLnI	LINE	A2780	AZA	67.9691	-1.06948
L1FLnI_4q31.21r	L1FLnI	LINE	A2780	AZA	89.368	-0.0320051
L1FLnI_12q14.1a	L1FLnI	LINE	A2780	AZA	98.8609	0.267555
L1FLnI_17q11.2a	L1FLnI	LINE	A2780	AZA	59.7206	-1.36321
L1FLnI_9p23v	L1FLnI	LINE	A2780	AZA	53.7761	-2.41051
L1FLnI_12q13.12	L1FLnI	LINE	A2780	AZA	55.7112	-1.13683
L1FLnI_10q24.2k	L1FLnI	LINE	A2780	AZA	94.4267	0.278202
L1FLnI_Xq22.3k	L1FLnI	LINE	A2780	AZA	98.8018	0.136183
L1FLnI_14q21.1w	L1FLnI	LINE	A2780	AZA	81.9122	-0.198235
L1FLnI_Xq11.2ka	L1FLnI	LINE	A2780	AZA	78.42	-0.296033
L1FLnI_11p15.4ca	L1FLnI	LINE	A2780	AZA	86.304	-0.595593
L1FLnI_6q12j	L1FLnI	LINE	A2780	AZA	75.5001	-0.903715
L1FLnI_3p22.1v	L1FLnI	LINE	A2780	AZA	89.0047	0.0790057
L1FLnI_6q16.1ca	L1FLnI	LINE	A2780	AZA	77.1602	-0.0106311
L1FLnI_3p25.3f	L1FLnI	LINE	A2780	AZA	59.7218	-1.16675
L1FLnI_4p11b	L1FLnI	LINE	A2780	AZA	94.1488	0.00774692
L1FLnI_2q32.3ca	L1FLnI	LINE	A2780	AZA	97.2316	0.0438162
L1FLnI_4p15.33p	L1FLnI	LINE	A2780	AZA	70.9125	-0.793373
L1FLnI_1p31.1fa	L1FLnI	LINE	A2780	AZA	78.7924	-1.07577
L1FLnI_3p21.31b	L1FLnI	LINE	A2780	AZA	78.1078	-0.700264
L1FLnI_13q13.3s	L1FLnI	LINE	A2780	AZA	58.6533	-1.70026
L1FLnI_12q14.1ma	L1FLnI	LINE	A2780	AZA	98.6643	0.0546229
L1FLnI_8q22.3p	L1FLnI	LINE	A2780	AZA	67.1743	-1.53034
L1FLnI_5p15.32d	L1FLnI	LINE	A2780	AZA	79.6295	-0.452337
L1FLnI_3q28c	L1FLnI	LINE	A2780	AZA	101.754	0.467128
L1FLnI_8q23.1s	L1FLnI	LINE	A2780	AZA	69.9853	-0.750775
L1FLnI_20p11.23c	L1FLnI	LINE	A2780	AZA	78.4674	-0.63048
L1FLnI_7p21.2q	L1FLnI	LINE	A2780	AZA	77.9582	-0.630482
L1FLnI_2q32.1q	L1FLnI	LINE	A2780	AZA	89.9932	-0.492978
L1FLnI_11q14.1fa	L1FLnI	LINE	A2780	AZA	105.351	0.28025
L1FLnI_7p14.3e	L1FLnI	LINE	A2780	AZA	77.2212	-0.134084
L1FLnI_6q22.31r	L1FLnI	LINE	A2780	AZA	75.4407	-0.263367
L1FLnI_6q15f	L1FLnI	LINE	A2780	AZA	106.889	0.306488
L1FLnI_16q12.1b	L1FLnI	LINE	A2780	AZA	92.1733	-0.073543
L1FLnI_3p21.2e	L1FLnI	LINE	A2780	AZA	81.1627	-0.356476
L1FLnI_6q16.3da	L1FLnI	LINE	A2780	AZA	107.187	0.377044
L1FLnI_8q22.1aa	L1FLnI	LINE	A2780	AZA	82.1527	-0.369668
L1FLnI_3q26.1b	L1FLnI	LINE	A2780	AZA	172.581	0.80297
L1FLnI_3q27.3b	L1FLnI	LINE	A2780	AZA	70.3313	-1.08239
L1FLnI_4q21.3f	L1FLnI	LINE	A2780	AZA	55.6239	-1.49742
L1FLnI_6q22.31v	L1FLnI	LINE	A2780	AZA	165.072	1.13387
L1FLnI_2p14p	L1FLnI	LINE	A2780	AZA	63.2539	-0.656207
L1FLnI_8p12m	L1FLnI	LINE	A2780	AZA	94.1543	0.0807561
L1FLnI_7q22.1i	L1FLnI	LINE	A2780	AZA	87.2707	-0.0123528
L1FLnI_12q21.2x	L1FLnI	LINE	A2780	AZA	97.3961	0.234561
L1FLI_4q33	L1FLI	LINE	A2780	AZA	92.6221	0.0626088
L1FLnI_10q23.32e	L1FLnI	LINE	A2780	AZA	94.1085	0.212999
L1FLnI_4q28.2i	L1FLnI	LINE	A2780	AZA	89.2155	0.0919834
L1FLnI_15q21.3z	L1FLnI	LINE	A2780	AZA	87.4016	0.145095
L1FLnI_12q23.1b	L1FLnI	LINE	A2780	AZA	108.398	0.792424
L1FLnI_15q21.3l	L1FLnI	LINE	A2780	AZA	74.58	-0.371963
L1FLnI_11p15.2j	L1FLnI	LINE	A2780	AZA	76.6816	-0.229944
L1FLnI_5p13.2fa	L1FLnI	LINE	A2780	AZA	70.5251	-0.94454
L1FLnI_4p11a	L1FLnI	LINE	A2780	AZA	68.9048	-0.586087
L1FLnI_8q11.21c	L1FLnI	LINE	A2780	AZA	87.551	0.19632
L1FLnI_9q22.31c	L1FLnI	LINE	A2780	AZA	105.682	0.366333
L1FLnI_8q11.21h	L1FLnI	LINE	A2780	AZA	76.7557	0.0481578
L1FLnI_11p14.1d	L1FLnI	LINE	A2780	AZA	64.1003	-0.861075
L1FLnI_4p15.2da	L1FLnI	LINE	A2780	AZA	101.721	0.0292982
L1FLnI_15q21.2b	L1FLnI	LINE	A2780	AZA	86.4283	0.15641
L1FLnI_3q25.1b	L1FLnI	LINE	A2780	AZA	91.9031	0.15641
L1FLI_15q23a	L1FLI	LINE	A2780	AZA	73.1126	-0.425864
L1FLnI_2q31.1s	L1FLnI	LINE	A2780	AZA	82.7574	0.0965563
L1FLnI_Xq11.2ja	L1FLnI	LINE	A2780	AZA	60.019	-0.921821
L1FLnI_3p21.33a	L1FLnI	LINE	A2780	AZA	52.4448	-1.20722
L1FLnI_4q32.1ha	L1FLnI	LINE	A2780	AZA	69.1185	-0.652635
L1FLnI_12q22i	L1FLnI	LINE	A2780	AZA	85.1729	0.150327
L1FLnI_5p15.2r	L1FLnI	LINE	A2780	AZA	51.1914	-1.74778
L1FLnI_10q21.2g	L1FLnI	LINE	A2780	AZA	86.1479	-0.0664459
L1ORF2_11q22.3	L1ORF2	LINE	A2780	AZA	74.0817	-0.467808
L1FLnI_15q21.2p	L1FLnI	LINE	A2780	AZA	93.7472	0.404184
L1FLnI_Xq11.2ia	L1FLnI	LINE	A2780	AZA	82.9957	0.179311
L1FLnI_14q23.3i	L1FLnI	LINE	A2780	AZA	99.0376	0.280004
L1FLnI_6p21.32a	L1FLnI	LINE	A2780	AZA	65.0458	-0.910325
L1FLnI_7q31.1ga	L1FLnI	LINE	A2780	AZA	83.6755	-0.0459814
L1FLnI_13q31.1f	L1FLnI	LINE	A2780	AZA	90.0334	0.327833
L1FLnI_2q11.2f	L1FLnI	LINE	A2780	AZA	81.4485	0.101261
L1FLnI_7q33c	L1FLnI	LINE	A2780	AZA	78.6434	0.101261
L1FLnI_8q21.13ia	L1FLnI	LINE	A2780	AZA	96.3197	0.0446777
L1FLnI_2p15k	L1FLnI	LINE	A2780	AZA	68.5911	-0.826588
L1FLnI_5q13.3h	L1FLnI	LINE	A2780	AZA	84.0458	0.382131
L1FLnI_Xq21.1hf	L1FLnI	LINE	A2780	AZA	75.0966	0.0754687
L1FLnI_1q24.3j	L1FLnI	LINE	A2780	AZA	82.4882	-0.0227121
L1FLnI_2q36.1c	L1FLnI	LINE	A2780	AZA	76.3856	-0.365104
L1FLnI_4q25ha	L1FLnI	LINE	A2780	AZA	86.3251	-0.0639347
L1FLnI_2q34t	L1FLnI	LINE	A2780	AZA	78.7769	-0.0849958
L1FLnI_Xp22.12d	L1FLnI	LINE	A2780	AZA	87.6077	0.0173655
L1FLnI_Xq21.1ye	L1FLnI	LINE	A2780	AZA	80.0472	-0.150091
L1FLnI_6q14.1ta	L1FLnI	LINE	A2780	AZA	71.8716	-0.417571
L1FLnI_5q21.1da	L1FLnI	LINE	A2780	AZA	61.2764	-0.746193
L1FLnI_4q23h	L1FLnI	LINE	A2780	AZA	75.3641	-0.0639345
L1FLnI_8q22.2p	L1FLnI	LINE	A2780	AZA	77.3647	-0.253791
L1FLnI_15q26.3d	L1FLnI	LINE	A2780	AZA	83.6275	0.00924313
L1FLnI_10p11.21a	L1FLnI	LINE	A2780	AZA	74.9303	-0.460242
L1FLI_11q14.3	L1FLI	LINE	A2780	AZA	61.3849	-0.990754
L1FLnI_7q21.3a	L1FLnI	LINE	A2780	AZA	87.402	0.265583
L1FLnI_6q16.3ga	L1FLnI	LINE	A2780	AZA	102.072	0.248709
L1FLnI_14q21.1s	L1FLnI	LINE	A2780	AZA	62.9911	-0.768363
L1FLnI_1q21.3c	L1FLnI	LINE	A2780	AZA	89.6478	-0.0521573
L1FLnI_6q14.2a	L1FLnI	LINE	A2780	AZA	79.4383	-0.206485
L1FLnI_9q21.12g	L1FLnI	LINE	A2780	AZA	60.3004	-0.875277
L1FLnI_8q23.1o	L1FLnI	LINE	A2780	AZA	50.4009	-1.68937
L1FLnI_10q21.3e	L1FLnI	LINE	A2780	AZA	63.4214	-0.791255
L1FLnI_18q21.33b	L1FLnI	LINE	A2780	AZA	65.3193	-0.476382
L1FLnI_2p24.3r	L1FLnI	LINE	A2780	AZA	77.4668	-0.315918
L1FLnI_Xq11.1q	L1FLnI	LINE	A2780	AZA	81.803	-0.0402834
L1FLnI_11q24.3h	L1FLnI	LINE	A2780	AZA	75.7181	-0.0402832
L1FLnI_7q33g	L1FLnI	LINE	A2780	AZA	107.939	0.658547
L1FLnI_1p32.3g	L1FLnI	LINE	A2780	AZA	79.659	-0.420887
L1FLnI_2q14.2l	L1FLnI	LINE	A2780	AZA	100.877	0.577411
L1FLnI_10q23.1ha	L1FLnI	LINE	A2780	AZA	85.2884	-0.0493724
L1FLnI_3p12.3w	L1FLnI	LINE	A2780	AZA	66.547	-0.710569
L1FLnI_8q21.11u	L1FLnI	LINE	A2780	AZA	98.8702	0.53559
L1FLnI_9q33.1f	L1FLnI	LINE	A2780	AZA	98.1408	0.53559
L1FLnI_1q42.3d	L1FLnI	LINE	A2780	AZA	91.0684	-0.00755199
L1FLnI_1p11.2g	L1FLnI	LINE	A2780	AZA	80.3255	0.0330898
L1FLnI_8p11.21k	L1FLnI	LINE	A2780	AZA	62.0545	-0.995478
L1FLnI_1p31.1da	L1FLnI	LINE	A2780	AZA	57.9095	-1.21787
L1FLnI_Xq26.2n	L1FLnI	LINE	A2780	AZA	75.6258	0.142024
L1FLnI_12q23.3d	L1FLnI	LINE	A2780	AZA	58.206	-0.954836
L1FLnI_4p15.31p	L1FLnI	LINE	A2780	AZA	69.9085	-0.170566
L1FLnI_6p22.3x	L1FLnI	LINE	A2780	AZA	68.1962	-0.480905
L1FLnI_6q25.3e	L1FLnI	LINE	A2780	AZA	73.1187	-0.18185
L1FLnI_3p14.1f	L1FLnI	LINE	A2780	AZA	61.1437	-0.827184
L1FLnI_10p13e	L1FLnI	LINE	A2780	AZA	43.4553	-2.11258
L1FLnI_12p11.22h	L1FLnI	LINE	A2780	AZA	70.2586	-0.18185
L1ORF2_5q31.1	L1ORF2	LINE	A2780	AZA	61.4436	-1.02512
L1FLnI_6q13o	L1FLnI	LINE	A2780	AZA	69.0927	-0.331228
L1FLnI_4q26oa	L1FLnI	LINE	A2780	AZA	124.484	0.887412
L1FLnI_7p21.2p	L1FLnI	LINE	A2780	AZA	68.3351	-0.527625
L1FLnI_6q16.3ha	L1FLnI	LINE	A2780	AZA	93.5822	0.27973
L1FLnI_6q22.1aa	L1FLnI	LINE	A2780	AZA	56.1982	-0.742756
L1FLnI_3p14.1h	L1FLnI	LINE	A2780	AZA	76.5347	-0.318949
L1FLnI_Xq26.2k	L1FLnI	LINE	A2780	AZA	54.0038	-1.45645
L1FLnI_11p15.4aa	L1FLnI	LINE	A2780	AZA	61.6759	-1.39987
L1FLnI_8q23.1r	L1FLnI	LINE	A2780	AZA	63.9188	-0.640876
L1FLnI_10q21.1sa	L1FLnI	LINE	A2780	AZA	64.5471	-0.674043
L1FLnI_4q34.3b	L1FLnI	LINE	A2780	AZA	61.072	-0.77838
L1FLnI_8q11.21a	L1FLnI	LINE	A2780	AZA	70.838	-0.0218362
L1FLnI_3p14.2p	L1FLnI	LINE	A2780	AZA	69.6512	-0.229944
L1FLnI_2q22.1fa	L1FLnI	LINE	A2780	AZA	103.692	0.757564
L1FLnI_2p13.2d	L1FLnI	LINE	A2780	AZA	84.3789	0.304392
L1FLnI_5q14.3mb	L1FLnI	LINE	A2780	AZA	82.582	-0.306566
L1FLnI_11q23.2d	L1FLnI	LINE	A2780	AZA	68.2579	-0.294075
L1FLnI_4p15.31q	L1FLnI	LINE	A2780	AZA	80.6318	0.172493
L1FLnI_5q12.1m	L1FLnI	LINE	A2780	AZA	69.0931	-0.217453
L1FLnI_13q14.2w	L1FLnI	LINE	A2780	AZA	73.6429	-0.374995
L1FLnI_3p21.2a	L1FLnI	LINE	A2780	AZA	75.2513	-0.242544
L1FLnI_Xq22.3aa	L1FLnI	LINE	A2780	AZA	83.0231	0.0120283
L1FLnI_2q14.1a	L1FLnI	LINE	A2780	AZA	57.5599	-0.490471
L1FLnI_4q22.1q	L1FLnI	LINE	A2780	AZA	68.291	-0.649169
L1FLnI_3q25.32j	L1FLnI	LINE	A2780	AZA	81.6497	0.0944902
L1FLnI_3p12.1j	L1FLnI	LINE	A2780	AZA	47.5577	-1.26807
L1FLnI_17q23.2c	L1FLnI	LINE	A2780	AZA	80.5265	-0.0628345
L1FLnI_5q23.2ma	L1FLnI	LINE	A2780	AZA	103.621	0.476324
L1FLnI_6p25.1f	L1FLnI	LINE	A2780	AZA	63.9394	-0.603402
L1FLnI_2q22.1p	L1FLnI	LINE	A2780	AZA	62.5652	-0.132097
L1FLnI_3p12.3n	L1FLnI	LINE	A2780	AZA	65.1915	-0.670517
L1FLnI_3p22.1u	L1FLnI	LINE	A2780	AZA	84.4524	0.222567
L1FLnI_5q11.2t	L1FLnI	LINE	A2780	AZA	67.8643	0.197805
L1FLnI_14q22.1p	L1FLnI	LINE	A2780	AZA	93.2958	0.593733
L1FLnI_6q12k	L1FLnI	LINE	A2780	AZA	53.9418	-1.09592
L1FLnI_7p21.1l	L1FLnI	LINE	A2780	AZA	76.2048	-0.0277556
L1FLnI_2q33.1a	L1FLnI	LINE	A2780	AZA	67.9914	-0.364874
L1FLnI_9p24.1e	L1FLnI	LINE	A2780	AZA	136.776	1.43843
L1FLnI_14q21.2j	L1FLnI	LINE	A2780	AZA	91.7607	0.284629
L1FLnI_14q21.3b	L1FLnI	LINE	A2780	AZA	56.979	-0.64498
L1FLnI_1q25.2o	L1FLnI	LINE	A2780	AZA	76.939	0.172154
L1FLnI_11p12fa	L1FLnI	LINE	A2780	AZA	64.9855	-0.154656
L1FLnI_Xq13.2fa	L1FLnI	LINE	A2780	AZA	74.8469	0.112448
L1FLnI_5q11.1f	L1FLnI	LINE	A2780	AZA	72.4436	0.172154
L1FLnI_3q28a	L1FLnI	LINE	A2780	AZA	88.8615	0.385031
L1FLnI_10p11.22c	L1FLnI	LINE	A2780	AZA	70.1353	-0.323921
L1FLnI_14q23.1ca	L1FLnI	LINE	A2780	AZA	63.7665	-0.217005
L1FLnI_18p11.21q	L1FLnI	LINE	A2780	AZA	61.8357	-0.738957
L1FLnI_Xq28wa	L1FLnI	LINE	A2780	AZA	105.182	0.676079
L1FLnI_7q31.31r	L1FLnI	LINE	A2780	AZA	86.3913	0.385031
L1FLnI_14q21.2ca	L1FLnI	LINE	A2780	AZA	66.4972	-0.439397
L1FLnI_4q33d	L1FLnI	LINE	A2780	AZA	82.612	0.451373
L1FLnI_3p14.2r	L1FLnI	LINE	A2780	AZA	66.4131	-0.269472
L1FLnI_17q24.1	L1FLnI	LINE	A2780	AZA	64.7217	-0.532506
L1FLnI_9q13i	L1FLnI	LINE	A2780	AZA	55.0061	-0.310863
L1FLnI_2q14.1ha	L1FLnI	LINE	A2780	AZA	72.7216	0.138443
L1FLnI_15q24.1a	L1FLnI	LINE	A2780	AZA	63.8371	-0.153323
L1FLnI_9p24.2g	L1FLnI	LINE	A2780	AZA	76.7135	-0.080567
L1FLnI_7q31.1y	L1FLnI	LINE	A2780	AZA	61.8434	-0.283383
L1FLnI_8q13.3j	L1FLnI	LINE	A2780	AZA	59.2667	-0.551872
L1FLnI_9q33.2b	L1FLnI	LINE	A2780	AZA	92.5229	0.729792
L1FLnI_Xq13.3d	L1FLnI	LINE	A2780	AZA	54.9114	-0.998127
L1FLnI_4q24ha	L1FLnI	LINE	A2780	AZA	58.1051	-0.605811
L1FLnI_7q33e	L1FLnI	LINE	A2780	AZA	61.5574	-0.474566
L1FLnI_2q31.2b	L1FLnI	LINE	A2780	AZA	59.0571	-0.571863
L1FLnI_8q21.13wa	L1FLnI	LINE	A2780	AZA	66.2919	-0.325703
L1FLnI_9p22.3p	L1FLnI	LINE	A2780	AZA	52.1687	-0.828202
L1FLnI_14q21.2c	L1FLnI	LINE	A2780	AZA	78.673	-0.243241
L1FLnI_8q22.2d	L1FLnI	LINE	A2780	AZA	75.2608	0.0595621
L1FLnI_7p21.2l	L1FLnI	LINE	A2780	AZA	68.0663	-0.340975
L1FLnI_4q26xa	L1FLnI	LINE	A2780	AZA	62.6147	-0.284392
L1FLnI_9p22.3b	L1FLnI	LINE	A2780	AZA	86.9682	0.585024
L1FLnI_6q13f	L1FLnI	LINE	A2780	AZA	67	-0.0887684
L1FLnI_7q35o	L1FLnI	LINE	A2780	AZA	59.3238	-0.579094
L1FLnI_14q23.3l	L1FLnI	LINE	A2780	AZA	83.3397	-0.0406742
L1FLI_1q31.1a	L1FLI	LINE	A2780	AZA	70.6999	-0.017215
L1FLnI_22q13.31a	L1FLnI	LINE	A2780	AZA	69.0776	-0.190052
L1FLnI_10q11.21f	L1FLnI	LINE	A2780	AZA	98.7758	0.742834
L1FLnI_6p21.1g	L1FLnI	LINE	A2780	AZA	58.1597	-0.298986
L1FLnI_8q21.13ma	L1FLnI	LINE	A2780	AZA	60.544	-0.579094
L1FLnI_6q27r	L1FLnI	LINE	A2780	AZA	50.0421	-1.32755
L1FLnI_11q14.1ea	L1FLnI	LINE	A2780	AZA	68.0222	-0.270972
L1FLnI_10q23.33a	L1FLnI	LINE	A2780	AZA	99.5494	0.9125
L1FLnI_Xp11.22la	L1FLnI	LINE	A2780	AZA	82.5127	0.290062
L1FLnI_3q24ca	L1FLnI	LINE	A2780	AZA	44.8635	-2.1505
L1FLnI_14q13.2	L1FLnI	LINE	A2780	AZA	75.5778	0.434453
L1FLnI_Xq22.3s	L1FLnI	LINE	A2780	AZA	54.4413	-0.658786
L1FLnI_4q26b	L1FLnI	LINE	A2780	AZA	57.2543	-0.329479
L1FLnI_18q21.1k	L1FLnI	LINE	A2780	AZA	79.9384	0.284628
L1FLnI_13q14.3i	L1FLnI	LINE	A2780	AZA	71.8176	-0.0134528
L1FLnI_14q21.2y	L1FLnI	LINE	A2780	AZA	62.7448	-0.420628
L1FLnI_2p14l	L1FLnI	LINE	A2780	AZA	49.238	-1.24375
L1FLnI_Xq21.1te	L1FLnI	LINE	A2780	AZA	62.7746	-0.420628
L1FLnI_4q12t	L1FLnI	LINE	A2780	AZA	74.6412	0.0330897
L1FLnI_2p14w	L1FLnI	LINE	A2780	AZA	79.0211	0.303738
L1FLnI_Xq22.3m	L1FLnI	LINE	A2780	AZA	71.4592	0.303737
L1FLnI_5q12.3f	L1FLnI	LINE	A2780	AZA	57.7357	-0.3896
L1FLnI_8p23.3a	L1FLnI	LINE	A2780	AZA	42.5398	-0.696257
L1FLnI_9q22.31f	L1FLnI	LINE	A2780	AZA	52.3636	-1.12303
L1FLnI_3p11.1f	L1FLnI	LINE	A2780	AZA	62.5841	-0.976186
L1FLnI_4q32.1ja	L1FLnI	LINE	A2780	AZA	58.8706	-1.0724
L1FLnI_14q21.1na	L1FLnI	LINE	A2780	AZA	55.0987	-0.644981
L1FLnI_7p22.3	L1FLnI	LINE	A2780	AZA	82.9803	0.135705
L1FLnI_5q14.3hb	L1FLnI	LINE	A2780	AZA	61.4692	-0.286528
L1FLnI_4q32.1z	L1FLnI	LINE	A2780	AZA	46.4861	-1.93038
L1FLnI_1q42.12m	L1FLnI	LINE	A2780	AZA	58.5897	-0.361856
L1FLnI_4q26ua	L1FLnI	LINE	A2780	AZA	91.3347	0.475872
L1FLnI_5q31.1b	L1FLnI	LINE	A2780	AZA	80.7875	0.607117
L1FLnI_3p12.2e	L1FLnI	LINE	A2780	AZA	137.979	1.26346
L1FLnI_6q22.1x	L1FLnI	LINE	A2780	AZA	59.1843	-0.216005
L1FLnI_6q13p	L1FLnI	LINE	A2780	AZA	70.7389	0.171018
L1FLnI_11p13e	L1FLnI	LINE	A2780	AZA	58.0897	-0.361856
L1FLnI_1q44g	L1FLnI	LINE	A2780	AZA	80.1083	0.212838
L1FLnI_7q31.1fa	L1FLnI	LINE	A2780	AZA	72.3858	0.192079
L1FLnI_Xq22.1fb	L1FLnI	LINE	A2780	AZA	71.4377	0.0377511
L1FLnI_Xq22.1eb	L1FLnI	LINE	A2780	AZA	80.925	0.233302
L1FLnI_2q23.1b	L1FLnI	LINE	A2780	AZA	69.3769	-0.0443888
L1FLnI_1q44e	L1FLnI	LINE	A2780	AZA	46.8558	-0.857974
L1FLnI_7q35n	L1FLnI	LINE	A2780	AZA	72.7506	-0.0694799
L1FLnI_5q23.2na	L1FLnI	LINE	A2780	AZA	78.0008	0.401411
L1FLnI_10p11.22q	L1FLnI	LINE	A2780	AZA	60.4895	-0.580441
L1FLnI_4q32.3o	L1FLnI	LINE	A2780	AZA	56.5463	-0.12101
L1FLnI_10q23.31b	L1FLnI	LINE	A2780	AZA	55.0608	-0.544817
L1FLnI_1q21.2e	L1FLnI	LINE	A2780	AZA	19.9125	-3.09494
L1FLnI_1p13.2m	L1FLnI	LINE	A2780	AZA	50.3229	-0.843761
L1FLnI_2q21.3g	L1FLnI	LINE	A2780	AZA	53.3282	-0.602751
L1FLnI_2q23.1e	L1FLnI	LINE	A2780	AZA	72.8626	0.0187346
L1FLnI_4q34.3r	L1FLnI	LINE	A2780	AZA	42.5456	-0.758869
L1FLnI_20p11.21v	L1FLnI	LINE	A2780	AZA	60.9023	-0.364594
L1FLnI_12p13.33d	L1FLnI	LINE	A2780	AZA	58.4476	-0.530603
L1FLnI_4q21.3a	L1FLnI	LINE	A2780	AZA	49.2027	-1.2443
L1FLnI_11q14.2l	L1FLnI	LINE	A2780	AZA	53.9228	-0.428724
L1FLnI_6p21.1i	L1FLnI	LINE	A2780	AZA	68.7708	-0.00551302
L1FLnI_7q35q	L1FLnI	LINE	A2780	AZA	56.4877	-0.981264
L1FLnI_2q11.1c	L1FLnI	LINE	A2780	AZA	53.2977	-0.84376
L1FLnI_1p31.1qc	L1FLnI	LINE	A2780	AZA	53.9857	-0.588398
L1FLnI_15q14o	L1FLnI	LINE	A2780	AZA	140.978	1.37413
L1FLnI_Xq13.3j	L1FLnI	LINE	A2780	AZA	56.563	-0.118913
L1FLnI_2p22.3a	L1FLnI	LINE	A2780	AZA	64.4305	-0.0158197
L1FLnI_15q24.3f	L1FLnI	LINE	A2780	AZA	61.9042	-0.259091
L1FLnI_1p21.3d	L1FLnI	LINE	A2780	AZA	59.3667	-0.481483
L1FLnI_8q21.3ca	L1FLnI	LINE	A2780	AZA	51.3948	-0.319211
L1ORF2_3q26.32a	L1ORF2	LINE	A2780	AZA	96.1623	0.448127
L1FLnI_11q12.1t	L1FLnI	LINE	A2780	AZA	64.4502	-0.229943
L1FLnI_Xq28xa	L1FLnI	LINE	A2780	AZA	90.8382	0.798911
L1FLnI_9p11.2e	L1FLnI	LINE	A2780	AZA	92.4925	0.583642
L1FLnI_3q24aa	L1FLnI	LINE	A2780	AZA	75.7766	-0.433036
L1FLnI_2q24.3o	L1FLnI	LINE	A2780	AZA	60.4018	-0.0779413
L1FLnI_Xq13.2ja	L1FLnI	LINE	A2780	AZA	79.1355	0.330523
L1ORF2_Xq22.2	L1ORF2	LINE	A2780	AZA	45.867	-0.905101
L1FLnI_1p22.1h	L1FLnI	LINE	A2780	AZA	76.4363	0.388626
L1FLnI_19p12f	L1FLnI	LINE	A2780	AZA	45.1094	-1.27433
L1FLnI_5q15aa	L1FLnI	LINE	A2780	AZA	51.6895	-0.433035
L1FLnI_17p12b	L1FLnI	LINE	A2780	AZA	73.5215	0.44448
L1FLnI_6p21.1f	L1FLnI	LINE	A2780	AZA	49.6898	-0.335738
L1FLnI_9p11.2f	L1FLnI	LINE	A2780	AZA	48.4223	-1.59672
L1FLnI_12q13.11x	L1FLnI	LINE	A2780	AZA	61.7301	0.155346
L1FLnI_3q11.2x	L1FLnI	LINE	A2780	AZA	47.5319	-0.71537
L1FLnI_5q14.2a	L1FLnI	LINE	A2780	AZA	60.2512	-0.259692
L1FLnI_3p14.1g	L1FLnI	LINE	A2780	AZA	54.2846	-0.559252
L1FLnI_Xq12t	L1FLnI	LINE	A2780	AZA	80.6257	0.709935
L1FLnI_13q32.1c	L1FLnI	LINE	A2780	AZA	68.7188	-0.321092
L1FLnI_6p25.1d	L1FLnI	LINE	A2780	AZA	87.375	0.614777
L1FLnI_4q25e	L1FLnI	LINE	A2780	AZA	72.1178	0.177713
L1FLnI_3p21.31d	L1FLnI	LINE	A2780	AZA	89.8826	0.725201
L1FLnI_8q22.1ba	L1FLnI	LINE	A2780	AZA	48.2553	-1.32109
L1FLnI_Xp22.2q	L1FLnI	LINE	A2780	AZA	53.3538	-0.452333
L1FLnI_5q23.1y	L1FLnI	LINE	A2780	AZA	43.1614	-1.25969
L1FLnI_15q25.2a	L1FLnI	LINE	A2780	AZA	42.6534	-2.03729
L1FLnI_3q26.31b	L1FLnI	LINE	A2780	AZA	75.4709	0.155345
L1FLnI_5q11.2s	L1FLnI	LINE	A2780	AZA	56.3306	-0.275268
L1FLnI_10q23.2	L1FLnI	LINE	A2780	AZA	68.984	0.19251
L1FLnI_Xq13.2z	L1FLnI	LINE	A2780	AZA	56.7332	-0.620403
L1FLnI_2q32.3ga	L1FLnI	LINE	A2780	AZA	71.4964	-0.101936
L1FLnI_1p21.2q	L1FLnI	LINE	A2780	AZA	81.2942	0.299425
L1FLnI_5q21.2b	L1FLnI	LINE	A2780	AZA	57.3499	-0.0484971
L1FLnI_7q31.1sa	L1FLnI	LINE	A2780	AZA	43.8906	-1.8149
L1FLnI_5q15j	L1FLnI	LINE	A2780	AZA	56.3869	-0.355475
L1FLnI_17q22ca	L1FLnI	LINE	A2780	AZA	49.4866	-0.770511
L1FLnI_2p14n	L1FLnI	LINE	A2780	AZA	52.1163	-1.22994
L1FLnI_4q13.3i	L1FLnI	LINE	A2780	AZA	60.269	-0.00755199
L1FLnI_3p14.3q	L1FLnI	LINE	A2780	AZA	65.0982	-0.260318
L1FLnI_11q22.3g	L1FLnI	LINE	A2780	AZA	70.2823	-0.114467
L1FLnI_16q22.2f	L1FLnI	LINE	A2780	AZA	59.2288	-0.0993603
L1FLnI_12p13.2e	L1FLnI	LINE	A2780	AZA	58.8077	0.107091
L1FLnI_2q31.1p	L1FLnI	LINE	A2780	AZA	69.3532	0.0330898
L1FLnI_2q33.1r	L1FLnI	LINE	A2780	AZA	78.2428	0.770056
L1FLnI_14q21.2z	L1FLnI	LINE	A2780	AZA	60.5086	-0.0993603
L1FLnI_15q21.3ea	L1FLnI	LINE	A2780	AZA	76.5088	-0.0449126
L1FLnI_Xq26.3h	L1FLnI	LINE	A2780	AZA	48.2671	-0.276237
L1FLnI_1q25.1i	L1FLnI	LINE	A2780	AZA	67.2683	0.215467
L1FLnI_12p13.33b	L1FLnI	LINE	A2780	AZA	61.2811	-0.00317368
L1FLnI_Xq11.1n	L1FLnI	LINE	A2780	AZA	40.1292	-0.877639
L1FLnI_3p21.2b	L1FLnI	LINE	A2780	AZA	60.9585	0.169663
L1FLnI_11q13.4g	L1FLnI	LINE	A2780	AZA	63.7552	-0.169823
L1FLnI_12p13.2h	L1FLnI	LINE	A2780	AZA	47.3037	-0.784532
L1FLnI_4q28.1h	L1FLnI	LINE	A2780	AZA	80.8384	0.444285
L1FLnI_Xq13.3q	L1FLnI	LINE	A2780	AZA	55.2966	-0.140677
L1FLnI_3p22.1ea	L1FLnI	LINE	A2780	AZA	58.7961	0.259862
L1FLnI_5q21.1l	L1FLnI	LINE	A2780	AZA	62.8249	0.0483566
L1FLnI_5p15.1i	L1FLnI	LINE	A2780	AZA	59.8692	-0.358268
L1FLnI_4q21.23a	L1FLnI	LINE	A2780	AZA	51.7153	-0.426981
L1FLnI_8q24.21h	L1FLnI	LINE	A2780	AZA	145.378	1.74685
L1FLnI_6q21d	L1FLnI	LINE	A2780	AZA	56.7564	-0.245541
L1ORF2_8q21.13	L1ORF2	LINE	A2780	AZA	50.9406	-0.769102
L1FLnI_15q22.31d	L1FLnI	LINE	A2780	AZA	83.6668	0.958817
L1FLnI_3p21.2l	L1FLnI	LINE	A2780	AZA	67.7124	0.208176
L1FLnI_Xq21.31ib	L1FLnI	LINE	A2780	AZA	57.071	-0.911121
L1FLnI_1p21.1b	L1FLnI	LINE	A2780	AZA	52.7383	-0.961747
L1FLnI_14q21.2e	L1FLnI	LINE	A2780	AZA	62.2949	-0.376786
L1FLnI_6q21c	L1FLnI	LINE	A2780	AZA	52.9185	-0.483701
L1FLI_5q32	L1FLI	LINE	A2780	AZA	93.3711	0.455947
L1FLnI_7q11.21v	L1FLnI	LINE	A2780	AZA	82.4487	0.529048
L1FLnI_6q14.1bc	L1FLnI	LINE	A2780	AZA	55.7068	-0.18315
L1FLnI_13q32.1e	L1FLnI	LINE	A2780	AZA	77.8369	0.619813
L1FLnI_7q32.1	L1FLnI	LINE	A2780	AZA	52.1683	-0.065313
L1FLnI_2q11.2h	L1FLnI	LINE	A2780	AZA	59.441	-0.123029
L1FLnI_16p12.2b	L1FLnI	LINE	A2780	AZA	62.4069	-0.0372991
L1FLnI_3q12.3a	L1FLnI	LINE	A2780	AZA	50.0604	-0.830847
L1FLnI_4p15.2z	L1FLnI	LINE	A2780	AZA	58.8273	0.120242
L1FLnI_8q24.21p	L1FLnI	LINE	A2780	AZA	64.7687	0.32835
L1FLnI_10q22.2b	L1FLnI	LINE	A2780	AZA	72.1484	0.547663
L1FLnI_2q32.2d	L1FLnI	LINE	A2780	AZA	68.0436	0.262261
L1FLnI_6p22.3a	L1FLnI	LINE	A2780	AZA	62.0918	-0.0493721
L1FLnI_5q14.2k	L1FLnI	LINE	A2780	AZA	56.1445	-0.0779411
L1FLnI_2p16.3n	L1FLnI	LINE	A2780	AZA	52.6051	-1.02136
L1FLI_1q25.1a	L1FLI	LINE	A2780	AZA	55.6852	-0.229944
L1FLnI_14q22.1k	L1FLnI	LINE	A2780	AZA	68.6643	0.653242
L1FLnI_Xp11.21sb	L1FLnI	LINE	A2780	AZA	44.7721	-1.26236
L1FLnI_1p12s	L1FLnI	LINE	A2780	AZA	44.117	-0.814905
L1FLnI_3q13.2l	L1FLnI	LINE	A2780	AZA	52.4185	-0.182116
L1FLnI_3p25.1g	L1FLnI	LINE	A2780	AZA	47.0869	-0.618214
L1FLnI_6q14.2j	L1FLnI	LINE	A2780	AZA	75.4978	0.579724
L1FLnI_12q23.3o	L1FLnI	LINE	A2780	AZA	56.2975	-0.0332525
L1FLnI_11q22.2c	L1FLnI	LINE	A2780	AZA	40.6213	-0.618213
L1FLnI_15q11.2n	L1FLnI	LINE	A2780	AZA	115.609	1.54225
L1FLnI_10p11.22l	L1FLnI	LINE	A2780	AZA	56.0612	-0.0618216
L1FLnI_6p25.2a	L1FLnI	LINE	A2780	AZA	36.652	-1.31335
L1FLnI_18q21.1l	L1FLnI	LINE	A2780	AZA	61.241	0.152303
L1FLnI_9p22.3m	L1FLnI	LINE	A2780	AZA	52.7208	-0.31336
L1FLnI_13q14.2r	L1FLnI	LINE	A2780	AZA	49.3384	-0.601913
L1FLnI_7q21.2h	L1FLnI	LINE	A2780	AZA	84.4467	0.614404
L1FLnI_2p15h	L1FLnI	LINE	A2780	AZA	52.7987	-0.104413
L1FLnI_15q21.3da	L1FLnI	LINE	A2780	AZA	43.7512	-0.644981
L1FLnI_7q22.1f	L1FLnI	LINE	A2780	AZA	63.6849	0.117979
L1FLnI_Xq13.3c	L1FLnI	LINE	A2780	AZA	44.098	-0.47992
L1FLnI_4q21.21j	L1FLnI	LINE	A2780	AZA	46.734	-0.26311
L1FLnI_6q22.31d	L1FLnI	LINE	A2780	AZA	49.7894	-0.988935
L1FLnI_1p11.2h	L1FLnI	LINE	A2780	AZA	53.1708	0.011064
L1FLnI_3p11.1o	L1FLnI	LINE	A2780	AZA	63.029	0.117979
L1FLnI_1p22.1j	L1FLnI	LINE	A2780	AZA	54.1592	-0.0169506
L1FLnI_1p33g	L1FLnI	LINE	A2780	AZA	67.1674	0.287904
L1FLnI_Xq13.3p	L1FLnI	LINE	A2780	AZA	50.5912	-0.441448
L1FLnI_3q12.1c	L1FLnI	LINE	A2780	AZA	46.3072	-0.297057
L1FLnI_10q22.1d	L1FLnI	LINE	A2780	AZA	47.0854	-0.585424
L1FLnI_Xq24l	L1FLnI	LINE	A2780	AZA	54.1919	-0.246623
L1FLnI_8q13.3k	L1FLnI	LINE	A2780	AZA	51.1716	-0.149325
L1FLnI_14q24.3a	L1FLnI	LINE	A2780	AZA	63.5382	0.304392
L1FLnI_1q21.3d	L1FLnI	LINE	A2780	AZA	64.0263	0.209755
L1FLnI_9p21.1ha	L1FLnI	LINE	A2780	AZA	94.9248	0.896968
L1FLnI_7p21.2o	L1FLnI	LINE	A2780	AZA	42.8257	-0.814905
L1FLnI_6q16.1e	L1FLnI	LINE	A2780	AZA	60.0438	0.0275518
L1FLnI_Xq21.33ka	L1FLnI	LINE	A2780	AZA	67.5147	0.185093
L1FLnI_4p16.3b	L1FLnI	LINE	A2780	AZA	56.7442	-0.132647
L1FLnI_18q22.2f	L1FLnI	LINE	A2780	AZA	81.3898	0.591718
L1FLnI_3q26.32v	L1FLnI	LINE	A2780	AZA	79.3634	0.770055
L1FLnI_12q22b	L1FLnI	LINE	A2780	AZA	67.4728	0.226434
L1FLnI_1q25.1e	L1FLnI	LINE	A2780	AZA	131.958	1.8201
L1FLnI_14q23.1x	L1FLnI	LINE	A2780	AZA	51.2869	-0.179904
L1FLnI_4q25qa	L1FLnI	LINE	A2780	AZA	42.1369	-0.469409
L1FLnI_2q11.2b	L1FLnI	LINE	A2780	AZA	40.9167	-0.469409
L1FLnI_3p22.1x	L1FLnI	LINE	A2780	AZA	70.7695	0.0885849
L1FLnI_Yq11.21r	L1FLnI	LINE	A2780	AZA	157.594	2.62745
L1FLnI_Xq22.3h	L1FLnI	LINE	A2780	AZA	48.2758	-0.534799
L1FLnI_Xq22.1db	L1FLnI	LINE	A2780	AZA	55.5807	0.105659
L1FLnI_5q12.3p	L1FLnI	LINE	A2780	AZA	74.8627	0.567562
L1FLnI_13q14.11d	L1FLnI	LINE	A2780	AZA	46.5381	-0.264709
L1FLnI_12p13.2i	L1FLnI	LINE	A2780	AZA	45.9634	-0.71537
L1FLnI_2p16.3o	L1FLnI	LINE	A2780	AZA	35.0975	-1.37433
L1FLnI_3q21.2b	L1FLnI	LINE	A2780	AZA	40.2482	-0.577866
L1FLnI_20p11.1a	L1FLnI	LINE	A2780	AZA	62.5483	0.527485
L1FLnI_1q25.3h	L1FLnI	LINE	A2780	AZA	79.972	0.804003
L1FLnI_10q23.32b	L1FLnI	LINE	A2780	AZA	48.8192	-0.577867
L1FLnI_11q22.3e	L1FLnI	LINE	A2780	AZA	54.9556	-0.229944
L1FLnI_14q23.1aa	L1FLnI	LINE	A2780	AZA	61.3128	0.395016
L1FLnI_Xq22.3na	L1FLnI	LINE	A2780	AZA	54.4708	-0.247432
L1FLnI_2q32.3fa	L1FLnI	LINE	A2780	AZA	40.5604	-1.14555
L1FLnI_16q12.1c	L1FLnI	LINE	A2780	AZA	46.0185	-0.395529
L1FLnI_1p12t	L1FLnI	LINE	A2780	AZA	48.4474	-0.395529
L1FLnI_18p11.21m	L1FLnI	LINE	A2780	AZA	57.6916	-0.0503951
L1FLnI_10q21.3d	L1FLnI	LINE	A2780	AZA	57.1829	0.0674421
L1FLnI_14q21.2x	L1FLnI	LINE	A2780	AZA	51.604	-0.178719
L1FLnI_9q31.1l	L1FLnI	LINE	A2780	AZA	34.3228	-2.28304
L1FLnI_12p11.22c	L1FLnI	LINE	A2780	AZA	45.8668	-0.229944
L1FLnI_14q31.3l	L1FLnI	LINE	A2780	AZA	73.648	0.621957
L1FLnI_3q26.1c	L1FLnI	LINE	A2780	AZA	60.5522	-0.339569
L1FLnI_10q23.32d	L1FLnI	LINE	A2780	AZA	44.1463	-0.339568
L1FLnI_3p22.1s	L1FLnI	LINE	A2780	AZA	48.8977	0.0563606
L1FLnI_11p15.4ba	L1FLnI	LINE	A2780	AZA	44.4178	-0.943639
L1FLnI_11p12aa	L1FLnI	LINE	A2780	AZA	59.1865	0.0272136
L1FLnI_15q14c	L1FLnI	LINE	A2780	AZA	60.3866	0.167391
L1FLnI_Xp22.2c	L1FLnI	LINE	A2780	AZA	48.2451	-0.265568
L1FLnI_5q32f	L1FLnI	LINE	A2780	AZA	55.4316	-0.0639346
L1FLnI_3q12.3b	L1FLnI	LINE	A2780	AZA	51.1115	-0.458213
L1FLnI_12q23.2a	L1FLnI	LINE	A2780	AZA	44.2155	-0.762439
L1FLnI_4q35.2g	L1FLnI	LINE	A2780	AZA	56.8023	0.452573
L1FLnI_5p13.2da	L1FLnI	LINE	A2780	AZA	52.829	-0.321867
L1FLnI_3p21.2j	L1FLnI	LINE	A2780	AZA	56.9377	-0.0462321
L1FLnI_2q12.2b	L1FLnI	LINE	A2780	AZA	77.5197	0.384402
L1FLnI_15q25.1b	L1FLnI	LINE	A2780	AZA	42.2724	-0.98483
L1FLnI_9q21.11e	L1FLnI	LINE	A2780	AZA	40.5367	-0.711812
L1FLnI_12q14.2i	L1FLnI	LINE	A2780	AZA	41.6007	-0.507477
L1FLnI_2q31.1z	L1FLnI	LINE	A2780	AZA	52.9182	-0.159555
L1FLnI_12p13.32f	L1FLnI	LINE	A2780	AZA	53.0921	-0.26647
L1FLnI_13q31.3n	L1FLnI	LINE	A2780	AZA	52.4735	-0.0600192
L1FLnI_1p11.2d	L1FLnI	LINE	A2780	AZA	51.0746	-0.0283105
L1FLnI_20p11.1c	L1FLnI	LINE	A2780	AZA	69.0189	0.378865
L1FLnI_3q13.31b	L1FLnI	LINE	A2780	AZA	41.6642	-0.796981
L1FLnI_Xp11.3j	L1FLnI	LINE	A2780	AZA	183.122	2.37294
L1FLnI_11q13.5d	L1FLnI	LINE	A2780	AZA	59.6278	0.0919835
L1FLnI_5q14.2b	L1FLnI	LINE	A2780	AZA	49.7317	-0.381947
L1FLnI_Xq21.31jb	L1FLnI	LINE	A2780	AZA	46.0569	-0.597674
L1FLnI_5q14.3ea	L1FLnI	LINE	A2780	AZA	73.5293	0.971689
L1FLnI_Xq24m	L1FLnI	LINE	A2780	AZA	58.6397	0.203015
L1FLnI_18p11.22f	L1FLnI	LINE	A2780	AZA	44.4398	-0.324271
L1FLnI_1p31.3z	L1FLnI	LINE	A2780	AZA	55.0791	0.636201
L1FLnI_3p12.3s	L1FLnI	LINE	A2780	AZA	46.5639	-0.248323
L1FLnI_7q21.11la	L1FLnI	LINE	A2780	AZA	31.8084	-0.579525
L1FLnI_16p11.2i	L1FLnI	LINE	A2780	AZA	43.2704	-0.211796
L1FLnI_3p11.2b	L1FLnI	LINE	A2780	AZA	41.186	-0.948761
L1FLnI_4q21.3e	L1FLnI	LINE	A2780	AZA	32.047	-2.07428
L1FLnI_17q23.2b	L1FLnI	LINE	A2780	AZA	45.4359	-0.10746
L1FLnI_2q23.1f	L1FLnI	LINE	A2780	AZA	69.3424	0.553737
L1FLnI_1p22.3l	L1FLnI	LINE	A2780	AZA	38.8375	-0.889866
L1FLnI_4q32.3da	L1FLnI	LINE	A2780	AZA	68.6074	0.770055
L1FLnI_5q22.1n	L1FLnI	LINE	A2780	AZA	44.7379	-0.363799
L1FLnI_3p26.2d	L1FLnI	LINE	A2780	AZA	36.6353	-1.1414
L1FLnI_7q21.11da	L1FLnI	LINE	A2780	AZA	43.6499	-0.345421
L1FLnI_11p12da	L1FLnI	LINE	A2780	AZA	49.1362	0.292009
L1FLnI_Xq11.2i	L1FLnI	LINE	A2780	AZA	45.4378	0.00821593
L1FLnI_6q21g	L1FLnI	LINE	A2780	AZA	49.9434	-0.386063
L1FLnI_12q24.22c	L1FLnI	LINE	A2780	AZA	28.2322	-1.8149
L1FLnI_2q22.1ea	L1FLnI	LINE	A2780	AZA	74.1488	1.05786
L1FLnI_9p24.1t	L1FLnI	LINE	A2780	AZA	35.2536	-0.796289
L1FLnI_2q14.2k	L1FLnI	LINE	A2780	AZA	56.7459	0.410159
L1FLnI_18q22.2c	L1FLnI	LINE	A2780	AZA	51.197	-0.452337
L1FLnI_19q13.12c	L1FLnI	LINE	A2780	AZA	51.9582	-0.542534
L1ORF2_1q25.2	L1ORF2	LINE	A2780	AZA	53.7432	0.310624
L1FLnI_4q12z	L1FLnI	LINE	A2780	AZA	67.8829	0.284628
L1FLnI_Xq24n	L1FLnI	LINE	A2780	AZA	47.0511	-0.139179
L1FLnI_Xq22.2e	L1FLnI	LINE	A2780	AZA	46.0849	-0.367447
L1FLnI_2p13.2h	L1FLnI	LINE	A2780	AZA	49.7059	-0.268418
L1FLnI_8p22j	L1FLnI	LINE	A2780	AZA	36.7723	-1.47787
L1FLnI_Xp21.1v	L1FLnI	LINE	A2780	AZA	64.8935	0.731581
L1FLnI_9q31.2a	L1FLnI	LINE	A2780	AZA	62.1096	0.380109
L1FLnI_Xq21.33ma	L1FLnI	LINE	A2780	AZA	41.6109	-0.61989
L1FLnI_1p31.1ha	L1FLnI	LINE	A2780	AZA	189.229	2.47632
L1ORF2_6q22.31	L1ORF2	LINE	A2780	AZA	46.4392	-0.523674
L1FLnI_1q41m	L1FLnI	LINE	A2780	AZA	48.1481	-0.433477
L1FLnI_4q13.3j	L1FLnI	LINE	A2780	AZA	42.7768	-0.348588
L1FLnI_4q28.1b	L1FLnI	LINE	A2780	AZA	55.0224	0.355018
L1FLnI_14q21.1ba	L1FLnI	LINE	A2780	AZA	48.7437	0.0767169
L1FLnI_8q24.21k	L1FLnI	LINE	A2780	AZA	121.2	1.47632
L1FLnI_10p12.31b	L1FLnI	LINE	A2780	AZA	58.6599	-0.0324981
L1FLnI_7q33u	L1FLnI	LINE	A2780	AZA	64.5549	0.6287
L1FLnI_7q22.2a	L1FLnI	LINE	A2780	AZA	48.4983	0.296125
L1FLnI_18p11.21r	L1FLnI	LINE	A2780	AZA	23.5479	-3.13679
L1FLnI_2q24.1ga	L1FLnI	LINE	A2780	AZA	42.976	-0.17336
L1FLnI_1q31.3g	L1FLnI	LINE	A2780	AZA	149.356	2.2827
L1FLnI_14q22.1l	L1FLnI	LINE	A2780	AZA	47.4048	-0.210835
L1FLnI_Xq24u	L1FLnI	LINE	A2780	AZA	118.165	1.77964
L1FLnI_1q24.2e	L1FLnI	LINE	A2780	AZA	61.4516	0.0958256
L1FLnI_12q23.1m	L1FLnI	LINE	A2780	AZA	47.6348	-0.873799
L1FLnI_3p22.1w	L1FLnI	LINE	A2780	AZA	45.2962	-0.19147
L1FLnI_4q12w	L1FLnI	LINE	A2780	AZA	63.2332	0.669126
L1FLnI_9q22.31a	L1FLnI	LINE	A2780	AZA	51.5164	-0.19147
L1FLnI_10p11.22j	L1FLnI	LINE	A2780	AZA	50.536	0.175312
L1FLnI_12q13.11g	L1FLnI	LINE	A2780	AZA	44.8973	-0.153995
L1FLnI_16q12.1a	L1FLnI	LINE	A2780	AZA	53.852	0.0200339
L1FLnI_7p14.1l	L1FLnI	LINE	A2780	AZA	67.6633	0.88253
L1FLnI_12q12h	L1FLnI	LINE	A2780	AZA	44.2802	-1.26947
L1FLnI_7p14.1w	L1FLnI	LINE	A2780	AZA	44.4902	0.175313
L1FLnI_12q12i	L1FLnI	LINE	A2780	AZA	61.071	0.315489
L1FLnI_12p13.2g	L1FLnI	LINE	A2780	AZA	39.317	-0.153994
L1FLnI_19q13.31c	L1FLnI	LINE	A2780	AZA	45.7713	-0.0818457
L1FLnI_11q14.1y	L1FLnI	LINE	A2780	AZA	50.4677	-0.395003
L1FLnI_7q21.11ba	L1FLnI	LINE	A2780	AZA	50.3738	-0.351934
L1FLnI_14q23.3o	L1FLnI	LINE	A2780	AZA	43.6052	-0.439397
L1FLnI_10q22.1c	L1FLnI	LINE	A2780	AZA	46.8271	0.115191
L1FLnI_4q28.1j	L1FLnI	LINE	A2780	AZA	46.2942	0.13482
L1FLnI_2q37.1h	L1FLnI	LINE	A2780	AZA	42.3325	-1.02745
L1FLnI_9q22.32g	L1FLnI	LINE	A2780	AZA	34.7131	-1.17184
L1FLnI_5q23.1ja	L1FLnI	LINE	A2780	AZA	91.6431	1.37465
L1FLnI_5q12.1j	L1FLnI	LINE	A2780	AZA	59.9522	0.602599
L1FLnI_1p31.1na	L1FLnI	LINE	A2780	AZA	36.2359	-1.24984
L1FLnI_13q14.11a	L1FLnI	LINE	A2780	AZA	70.8287	0.667693
L1FLnI_6q12c	L1FLnI	LINE	A2780	AZA	61.8329	0.602599
L1FLnI_7p14.1m	L1FLnI	LINE	A2780	AZA	59.0875	0.602599
L1FLnI_4p15.31n	L1FLnI	LINE	A2780	AZA	53.764	0.0396625
L1FLnI_1q32.1m	L1FLnI	LINE	A2780	AZA	55.5272	1.32805
L1FLnI_Xq28ma	L1FLnI	LINE	A2780	AZA	42.8407	-0.114466
L1FLnI_1p22.2w	L1FLnI	LINE	A2780	AZA	34.6901	-0.75601
L1FLnI_5q14.1d	L1FLnI	LINE	A2780	AZA	58.2728	0.66622
L1FLnI_3p12.1h	L1FLnI	LINE	A2780	AZA	29.8697	-1.94043
L1FLnI_5q14.1m	L1FLnI	LINE	A2780	AZA	39.7588	-0.814905
L1FLnI_2p25.3j	L1FLnI	LINE	A2780	AZA	61.7257	0.866917
L1FLnI_5q12.1k	L1FLnI	LINE	A2780	AZA	52.7753	0.21484
L1FLnI_18p11.21p	L1FLnI	LINE	A2780	AZA	40.1441	-0.814906
L1FLnI_11q22.3ba	L1FLnI	LINE	A2780	AZA	50.9798	0.30057
L1FLnI_7q21.11ca	L1FLnI	LINE	A2780	AZA	32.2412	-0.445671
L1FLnI_18q12.2o	L1FLnI	LINE	A2780	AZA	49.7099	-0.151942
L1FLnI_1q31.3f	L1FLnI	LINE	A2780	AZA	154.427	2.40821
L1FLnI_8q13.3g	L1FLnI	LINE	A2780	AZA	39.9587	-0.292228
L1FLnI_1q32.3a	L1FLnI	LINE	A2780	AZA	50.252	0.320748
L1FLnI_8q23.1n	L1FLnI	LINE	A2780	AZA	35.2666	-1.13176
L1FLnI_11q13.5f	L1FLnI	LINE	A2780	AZA	53.5267	-0.624803
L1FLnI_1p31.3d	L1FLnI	LINE	A2780	AZA	34.646	-0.624803
L1FLnI_Xq26.2l	L1FLnI	LINE	A2780	AZA	62.9543	0.427663
L1FLnI_5q12.3m	L1FLnI	LINE	A2780	AZA	45.2044	-0.170238
L1FLnI_7q21.11c	L1FLnI	LINE	A2780	AZA	38.1161	-0.624803
L1FLnI_11q22.3c	L1FLnI	LINE	A2780	AZA	45.4451	0.0330904
L1FLnI_1p31.1ma	L1FLnI	LINE	A2780	AZA	32.6325	-1.35922
L1FLnI_2p14m	L1FLnI	LINE	A2780	AZA	31.8639	-1.55187
L1FLnI_10q24.2h	L1FLnI	LINE	A2780	AZA	38.9406	-0.835664
L1FLnI_1q25.1f	L1FLnI	LINE	A2780	AZA	41.6944	-0.189302
L1FLnI_14q22.1i	L1FLnI	LINE	A2780	AZA	32.312	-0.966908
L1FLnI_13q12.12b	L1FLnI	LINE	A2780	AZA	31.6703	-0.658783
L1FLnI_Xq11.2e	L1FLnI	LINE	A2780	AZA	32.8166	-0.966907
L1FLnI_11q22.3i	L1FLnI	LINE	A2780	AZA	45.5872	-0.966908
L1FLnI_13q31.3o	L1FLnI	LINE	A2780	AZA	40.0925	-0.604337
L1FLnI_6q16.3ba	L1FLnI	LINE	A2780	AZA	57.2728	-0.0372994
L1FLnI_9p23a	L1FLnI	LINE	A2780	AZA	40.1934	-0.604339
L1FLnI_7p21.1i	L1FLnI	LINE	A2780	AZA	54.7171	0.592268
L1FLnI_14q23.3a	L1FLnI	LINE	A2780	AZA	45.2793	0.0877959
L1FLnI_6p22.3y	L1FLnI	LINE	A2780	AZA	56.8739	0.246493
L1FLnI_14q12ma	L1FLnI	LINE	A2780	AZA	41.5736	-0.480487
L1FLnI_1q32.3b	L1FLnI	LINE	A2780	AZA	33.4461	-1.251
L1FLnI_9q21.12f	L1FLnI	LINE	A2780	AZA	53.8318	0.592268
L1FLnI_8q21.13xa	L1FLnI	LINE	A2780	AZA	58.5775	0.661531
L1FLnI_2q24.2a	L1FLnI	LINE	A2780	AZA	37.927	-0.384272
L1FLnI_15q21.2r	L1FLnI	LINE	A2780	AZA	64.485	0.682592
L1FLnI_7q34k	L1FLnI	LINE	A2780	AZA	30.9468	-0.410514
L1FLnI_7q33a	L1FLnI	LINE	A2780	AZA	42.1886	-0.0320049
L1FLnI_Xq21.1rc	L1FLnI	LINE	A2780	AZA	30.3585	-0.995477
L1FLnI_4q12ia	L1FLnI	LINE	A2780	AZA	53.2502	0.489948
L1FLnI_11p15.1l	L1FLnI	LINE	A2780	AZA	60.3016	0.70496
L1FLnI_15q21.2l	L1FLnI	LINE	A2780	AZA	31.7922	-0.857974
L1FLnI_19q13.12a	L1FLnI	LINE	A2780	AZA	36.8808	-0.188123
L1FLnI_14q13.3c	L1FLnI	LINE	A2780	AZA	57.978	0.659872
L1FLnI_1p32.1d	L1FLnI	LINE	A2780	AZA	40.7907	-0.459426
L1FLnI_12p11.23e	L1FLnI	LINE	A2780	AZA	53.8983	0.458854
L1FLnI_10q21.3m	L1FLnI	LINE	A2780	AZA	37.3592	-0.251639
L1FLnI_11q24.3g	L1FLnI	LINE	A2780	AZA	38.5973	-0.438052
L1FLnI_4q32.3ea	L1FLnI	LINE	A2780	AZA	39.3592	-0.251639
L1FLnI_4q21.3g	L1FLnI	LINE	A2780	AZA	26.7125	-1.59559
L1FLnI_4q32.1ga	L1FLnI	LINE	A2780	AZA	35.8035	-0.541145
L1FLnI_13q14.3d	L1FLnI	LINE	A2780	AZA	44.1839	0.163399
L1FLnI_11q12.3a	L1FLnI	LINE	A2780	AZA	46.9267	0.0962842
L1FLnI_13q13.3d	L1FLnI	LINE	A2780	AZA	40.8984	-0.16675
L1FLnI_3q26.31i	L1FLnI	LINE	A2780	AZA	36.083	-0.71107
L1FLnI_1p33j	L1FLnI	LINE	A2780	AZA	33.7481	-0.71107
L1FLnI_8q23.1i	L1FLnI	LINE	A2780	AZA	37.4042	-0.652174
L1FLnI_Xp22.12b	L1FLnI	LINE	A2780	AZA	42.2147	-0.251639
L1FLnI_3p24.3ja	L1FLnI	LINE	A2780	AZA	38.6891	-0.389143
L1FLnI_14q13.3j	L1FLnI	LINE	A2780	AZA	48.4731	0.227528
L1FLnI_1p31.1sa	L1FLnI	LINE	A2780	AZA	44.425	0.258555
L1FLnI_3q26.32u	L1FLnI	LINE	A2780	AZA	137.181	2.20381
L1FLnI_20p13i	L1FLnI	LINE	A2780	AZA	46.903	0.117979
L1FLnI_7q22.1h	L1FLnI	LINE	A2780	AZA	33.8342	-0.88202
L1FLnI_16p11.2g	L1FLnI	LINE	A2780	AZA	44.5286	-0.0648851
L1FLnI_1p13.3l	L1FLnI	LINE	A2780	AZA	68.5633	1.04759
L1FLnI_11q21g	L1FLnI	LINE	A2780	AZA	30.8166	-0.466982
L1FLnI_12p13.2f	L1FLnI	LINE	A2780	AZA	41.2534	-0.064885
L1FLnI_10q22.1b	L1FLnI	LINE	A2780	AZA	41.1241	-0.416357
L1FLnI_4q12u	L1FLnI	LINE	A2780	AZA	61.6374	0.770055
L1FLnI_6q16.3ca	L1FLnI	LINE	A2780	AZA	42.022	0.0110639
L1FLnI_3p24.3sa	L1FLnI	LINE	A2780	AZA	29.6113	-1.18687
L1FLnI_3q26.32t	L1FLnI	LINE	A2780	AZA	118.436	2.31812
L1FLI_1q25.3	L1FLI	LINE	A2780	AZA	55.7442	0.207119
L1FLnI_17q24.2a	L1FLnI	LINE	A2780	AZA	38.7904	-0.551872
L1FLnI_3p22.2b	L1FLnI	LINE	A2780	AZA	35.2585	-0.444956
L1FLnI_3q21.3c	L1FLnI	LINE	A2780	AZA	36.8461	-0.252312
L1ORF2_5q14.2	L1ORF2	LINE	A2780	AZA	34.1007	-0.252311
L1FLnI_6q14.1va	L1FLnI	LINE	A2780	AZA	45.3426	0.10524
L1FLnI_14q22.2g	L1FLnI	LINE	A2780	AZA	31.7877	-0.792879
L1FLnI_6q12ta	L1FLnI	LINE	A2780	AZA	24.2176	-1.79287
L1FLnI_Xq22.3ma	L1FLnI	LINE	A2780	AZA	48.7418	0.173952
L1FLnI_3q23h	L1FLnI	LINE	A2780	AZA	42.9019	-0.00438427
L1FLnI_15q23e	L1FLnI	LINE	A2780	AZA	46.4958	-0.0428589
L1FLnI_3p22.1k	L1FLnI	LINE	A2780	AZA	38.5305	0.0696163
L1FLnI_8q22.2k	L1FLnI	LINE	A2780	AZA	46.3681	0.207119
L1FLnI_15q21.1i	L1FLnI	LINE	A2780	AZA	28.0893	-1.66734
L1FLnI_5q14.1i	L1FLnI	LINE	A2780	AZA	50.4673	0.362397
L1FLnI_3q13.33g	L1FLnI	LINE	A2780	AZA	32.2151	-0.394329
L1FLnI_2q34na	L1FLnI	LINE	A2780	AZA	53.9965	0.413911
L1FLnI_13q31.3k	L1FLnI	LINE	A2780	AZA	48.2613	0.0554576
L1FLnI_11q24.3j	L1FLnI	LINE	A2780	AZA	34.726	-0.275747
L1FLnI_13q13.3p	L1FLnI	LINE	A2780	AZA	41.2901	-0.323053
L1FLnI_18q23k	L1FLnI	LINE	A2780	AZA	47.6936	0.384766
L1FLnI_6q12h	L1FLnI	LINE	A2780	AZA	21.9913	-3.22993
L1FLnI_8p21.3i	L1FLnI	LINE	A2780	AZA	62.4917	0.87858
L1FLnI_9p22.3o	L1FLnI	LINE	A2780	AZA	34.9385	-0.644981
L1FLnI_2q23.3j	L1FLnI	LINE	A2780	AZA	33.7197	-0.060018
L1FLnI_5q23.1z	L1FLnI	LINE	A2780	AZA	27.5866	-1.32305
L1FLnI_7q31.1z	L1FLnI	LINE	A2780	AZA	39.2625	-0.371963
L1FLnI_5q12.1fa	L1FLnI	LINE	A2780	AZA	54.3724	0.355018
L1FLnI_14q24.2a	L1FLnI	LINE	A2780	AZA	44.053	0.19632
L1FLnI_12q23.3q	L1FLnI	LINE	A2780	AZA	38.2512	-0.275748
L1FLnI_5q23.1k	L1FLnI	LINE	A2780	AZA	52.1529	0.723513
L1FLnI_8q24.21m	L1FLnI	LINE	A2780	AZA	113.66	1.52069
L1FLnI_17p13.1a	L1FLnI	LINE	A2780	AZA	91.9643	1.67542
L1FLnI_9q31.1e	L1FLnI	LINE	A2780	AZA	51.943	0.436632
L1FLnI_14q12va	L1FLnI	LINE	A2780	AZA	40.9544	-0.349243
L1FLnI_1p21.3m	L1FLnI	LINE	A2780	AZA	31.4769	-0.563367
L1FLnI_Xq13.2ba	L1FLnI	LINE	A2780	AZA	43.8155	0.0407036
L1FLnI_8q11.21e	L1FLnI	LINE	A2780	AZA	35.3618	-0.747792
L1FLnI_8q13.3l	L1FLnI	LINE	A2780	AZA	35.5796	-0.814905
L1FLnI_1q24.3f	L1FLnI	LINE	A2780	AZA	60.1027	0.770055
L1FLnI_11p12b	L1FLnI	LINE	A2780	AZA	27.1979	-1.62226
L1FLnI_6q15a	L1FLnI	LINE	A2780	AZA	54.641	0.625665
L1FLnI_Xq11.1k	L1FLnI	LINE	A2780	AZA	35.4523	-0.253026
L1FLnI_9p24.2h	L1FLnI	LINE	A2780	AZA	40.2449	0.219041
L1FLnI_Xq24p	L1FLnI	LINE	A2780	AZA	38.7458	-0.300333
L1FLnI_Xq21.1qc	L1FLnI	LINE	A2780	AZA	34.2673	-0.599177
L1FLnI_3q25.31b	L1FLnI	LINE	A2780	AZA	34.6425	-1.18414
L1FLnI_2p13.1f	L1FLnI	LINE	A2780	AZA	35.4384	-0.0142147
L1FLnI_9p22.2c	L1FLnI	LINE	A2780	AZA	41.9375	0.430569
L1FLnI_5q12.3j	L1FLnI	LINE	A2780	AZA	25.9707	-1.01421
L1FLnI_14q22.1h	L1FLnI	LINE	A2780	AZA	35.4556	-0.4837
L1FLnI_5q14.2i	L1FLnI	LINE	A2780	AZA	283.199	3.28753
L1ORF2_4q27a	L1ORF2	LINE	A2780	AZA	28.7944	-0.86221
L1FLnI_4q28.3u	L1FLnI	LINE	A2780	AZA	61.467	0.881948
L1FLnI_14q13.3g	L1FLnI	LINE	A2780	AZA	38.1241	-0.0142153
L1FLnI_13q14.2m	L1FLnI	LINE	A2780	AZA	40.0761	0.0253129
L1FLnI_13q12.3i	L1FLnI	LINE	A2780	AZA	47.3789	0.67384
L1FLnI_2p22.2e	L1FLnI	LINE	A2780	AZA	43.0025	-0.0548577
L1FLnI_9p24.2i	L1FLnI	LINE	A2780	AZA	34.1452	-0.862211
L1FLnI_5q13.3t	L1FLnI	LINE	A2780	AZA	43.2591	-0.139747
L1FLI_7p14.3	L1FLI	LINE	A2780	AZA	32.935	-0.116287
L1FLnI_4q28.1ja	L1FLnI	LINE	A2780	AZA	38.566	0.00924363
L1FLnI_7q31.1ba	L1FLnI	LINE	A2780	AZA	31.4827	-0.3027
L1FLnI_16q22.2h	L1FLnI	LINE	A2780	AZA	65.5526	1.16125
L1FLnI_16q12.1m	L1FLnI	LINE	A2780	AZA	33.3832	-0.768363
L1FLnI_6p22.1b	L1FLnI	LINE	A2780	AZA	49.5683	0.646674
L1FLnI_10q24.2l	L1FLnI	LINE	A2780	AZA	38.7537	-0.160682
L1FLnI_5q14.1n	L1FLnI	LINE	A2780	AZA	37.3348	-0.912752
L1FLnI_14q13.3f	L1FLnI	LINE	A2780	AZA	45.4703	0.19687
L1FLnI_Xq21.1xe	L1FLnI	LINE	A2780	AZA	35.5261	-0.353326
L1FLnI_4p15.31m	L1FLnI	LINE	A2780	AZA	35.5423	-0.302699
L1FLnI_22q11.22c	L1FLnI	LINE	A2780	AZA	33.4863	-0.838752
L1FLnI_6p12.1c	L1FLnI	LINE	A2780	AZA	39.9343	-0.049372
L1FLnI_12q21.1a	L1FLnI	LINE	A2780	AZA	24.4549	-1.43639
L1FLnI_12q15o	L1FLnI	LINE	A2780	AZA	33.392	-0.492977
L1FLnI_14q12ab	L1FLnI	LINE	A2780	AZA	27.0355	-1.13683
L1FLnI_18q22.2e	L1FLnI	LINE	A2780	AZA	27.0067	-0.492975
L1FLnI_6q13g	L1FLnI	LINE	A2780	AZA	55.851	0.448127
L1FLnI_11p12ba	L1FLnI	LINE	A2780	AZA	30.9425	-0.492978
L1FLnI_13q14.11e	L1FLnI	LINE	A2780	AZA	28.0134	-0.613271
L1FLnI_18q12.2m	L1FLnI	LINE	A2780	AZA	31.7959	-0.381947
L1FLnI_4q28.1t	L1FLnI	LINE	A2780	AZA	44.2884	0.255482
L1FLnI_17q21.31	L1FLnI	LINE	A2780	AZA	32.4166	-0.888906
L1FLnI_Xq22.3la	L1FLnI	LINE	A2780	AZA	36.6494	-0.278853
L1FLnI_4q22.1r	L1FLnI	LINE	A2780	AZA	31.5471	-0.527624
L1FLnI_14q21.1x	L1FLnI	LINE	A2780	AZA	35.4481	0.244965
L1FLnI_6p12.1d	L1FLnI	LINE	A2780	AZA	33.4398	-0.305232
L1FLnI_Xp11.4c	L1FLnI	LINE	A2780	AZA	47.123	0.410974
L1FLnI_4q12v	L1FLnI	LINE	A2780	AZA	36.1122	-0.112587
L1FLnI_2p15l	L1FLnI	LINE	A2780	AZA	36.5565	-0.412147
L1FLnI_Xq23g	L1FLnI	LINE	A2780	AZA	31.1208	-0.412147
L1FLnI_6p21.1h	L1FLnI	LINE	A2780	AZA	29.267	-0.720269
L1FLnI_5q13.3g	L1FLnI	LINE	A2780	AZA	28.7158	-1.20569
L1FLnI_1p22.2y	L1FLnI	LINE	A2780	AZA	25.7526	-1.11258
L1FLnI_11q14.1ca	L1FLnI	LINE	A2780	AZA	41.5207	-0.0251245
L1FLnI_14q12wa	L1FLnI	LINE	A2780	AZA	36.7077	-0.527624
L1FLnI_Xq25bc	L1FLnI	LINE	A2780	AZA	26.5875	-1.11258
L1FLnI_4q23c	L1FLnI	LINE	A2780	AZA	21.7453	-1.52762
L1FLnI_10q21.1pa	L1FLnI	LINE	A2780	AZA	42.4797	0.33834
L1FLnI_18q11.2f	L1FLnI	LINE	A2780	AZA	81.2727	1.54143
L1FLnI_9q22.33c	L1FLnI	LINE	A2780	AZA	35.1356	-0.628493
L1FLnI_Xp11.21fb	L1FLnI	LINE	A2780	AZA	43.0727	-0.000462566
L1FLnI_11q14.1w	L1FLnI	LINE	A2780	AZA	51.8178	-0.133729
L1FLnI_18q12.1s	L1FLnI	LINE	A2780	AZA	32.4115	-0.28057
L1FLI_6p21.1	L1FLI	LINE	A2780	AZA	31.8611	-0.280569
L1FLnI_13q14.11p	L1FLnI	LINE	A2780	AZA	31.7941	-0.502962
L1FLnI_Xq11.2h	L1FLnI	LINE	A2780	AZA	32.7211	-0.280569
L1FLnI_Xq11.2fa	L1FLnI	LINE	A2780	AZA	34.4824	-0.387484
L1FLnI_12q12m	L1FLnI	LINE	A2780	AZA	30.1465	-1.00046
L1FLnI_11q13.5h	L1FLnI	LINE	A2780	AZA	40.8079	0.403928
L1FLnI_7q32.2a	L1FLnI	LINE	A2780	AZA	61.3935	1.082
L1FLnI_22q12.3a	L1FLnI	LINE	A2780	AZA	29.1613	-2.50295
L1FLnI_16q12.1e	L1FLnI	LINE	A2780	AZA	41.0518	0.185093
L1FLnI_13q13.2c	L1FLnI	LINE	A2780	AZA	38.7997	0.259094
L1FLnI_3p14.2v	L1FLnI	LINE	A2780	AZA	29.0092	-0.362393
L1FLnI_22p11.2g	L1FLnI	LINE	A2780	AZA	114.47	2.47632
L1FLnI_9p22.3d	L1FLnI	LINE	A2780	AZA	156.218	2.78265
L1FLnI_1q44f	L1FLnI	LINE	A2780	AZA	26.3353	-1.7409
L1FLnI_4q24va	L1FLnI	LINE	A2780	AZA	30.5519	-0.814906
L1FLnI_Xq22.3i	L1FLnI	LINE	A2780	AZA	41.6387	0.107091
L1FLnI_4q27i	L1FLnI	LINE	A2780	AZA	35.3135	-0.282412
L1FLnI_5q14.1h	L1FLnI	LINE	A2780	AZA	42.2769	0.547663
L1FLnI_3q25.32a	L1FLnI	LINE	A2780	AZA	31.5983	-0.130408
L1FLnI_9p22.3f	L1FLnI	LINE	A2780	AZA	30.6453	-0.71537
L1FLnI_9p22.3n	L1FLnI	LINE	A2780	AZA	19.6787	-1.57786
L1FLnI_8p22g	L1FLnI	LINE	A2780	AZA	45.3691	0.66314
L1FLnI_5q21.1k	L1FLnI	LINE	A2780	AZA	29.4546	-0.949833
L1FLnI_2q31.2e	L1FLnI	LINE	A2780	AZA	26.1861	-1.13041
L1FLnI_18q12.2l	L1FLnI	LINE	A2780	AZA	31.4945	-0.393442
L1FLnI_6q23.2b	L1FLnI	LINE	A2780	AZA	28.2852	-0.715369
L1FLnI_Xp11.21ec	L1FLnI	LINE	A2780	AZA	35.0492	-0.577867
L1FLnI_9p22.3j	L1FLnI	LINE	A2780	AZA	33.4368	-0.203949
L1FLnI_2q22.1q	L1FLnI	LINE	A2780	AZA	41.1743	0.310624
L1FLnI_7p14.3c	L1FLnI	LINE	A2780	AZA	38.5752	0.117979
L1FLnI_Xq22.3z	L1FLnI	LINE	A2780	AZA	35.7807	-0.256416
L1FLnI_18q11.2h	L1FLnI	LINE	A2780	AZA	35.6633	-0.487742
L1FLnI_15q21.3ca	L1FLnI	LINE	A2780	AZA	29.4102	-1.0113
L1FLnI_10p12.1c	L1FLnI	LINE	A2780	AZA	49.0708	0.821586
L1FLnI_2q37.1e	L1FLnI	LINE	A2780	AZA	96.8892	1.83418
L1FLnI_8p11.1f	L1FLnI	LINE	A2780	AZA	15.2462	-2.42633
L1FLnI_Xq13.3y	L1FLnI	LINE	A2780	AZA	24.0187	-1.8149
L1FLnI_7q31.1ta	L1FLnI	LINE	A2780	AZA	29.1691	-0.662903
L1FLnI_18q12.1v	L1FLnI	LINE	A2780	AZA	28.3345	-0.461269
L1FLnI_10p12.1a	L1FLnI	LINE	A2780	AZA	29.5109	-0.592513
L1FLI_1p13.2	L1FLI	LINE	A2780	AZA	27.3272	-0.736903
L1FLnI_5q31.1l	L1FLnI	LINE	A2780	AZA	42.1457	0.224621
L1FLnI_15q24.3b	L1FLnI	LINE	A2780	AZA	33.9513	-0.592514
L1FLnI_9p22.2e	L1FLnI	LINE	A2780	AZA	46.9297	0.743088
L1FLnI_11q14.1v	L1FLnI	LINE	A2780	AZA	31.2497	-0.461269
L1FLnI_3p22.1b	L1FLnI	LINE	A2780	AZA	23.0516	-0.984829
L1FLnI_Xq11.2ha	L1FLnI	LINE	A2780	AZA	24.3868	-0.736902
L1FLnI_4q32.1ka	L1FLnI	LINE	A2780	AZA	27.1428	-1.5254
L1FLnI_1q24.2h	L1FLnI	LINE	A2780	AZA	35.264	-0.177477
L1FLnI_8q11.23j	L1FLnI	LINE	A2780	AZA	44.1401	0.60013
L1FLnI_1p13.1b	L1FLnI	LINE	A2780	AZA	30.1806	-0.592513
L1FLnI_12q24.22a	L1FLnI	LINE	A2780	AZA	58.6154	0.949025
L1FLnI_7q35p	L1FLnI	LINE	A2780	AZA	25.4206	-0.635935
L1FLnI_11p14.1o	L1FLnI	LINE	A2780	AZA	38.195	0.0865292
L1FLnI_5p12z	L1FLnI	LINE	A2780	AZA	37.8398	0.212061
L1FLnI_3p12.3x	L1FLnI	LINE	A2780	AZA	30.6551	-0.314008
L1FLnI_2q22.2c	L1FLnI	LINE	A2780	AZA	39.3313	0.434452
L1FLnI_1p22.2z	L1FLnI	LINE	A2780	AZA	26.7621	-0.787938
L1FLnI_15q14e	L1FLnI	LINE	A2780	AZA	36.6098	-0.050974
L1FLnI_3q13.33i	L1FLnI	LINE	A2780	AZA	34.8153	-0.498433
L1FLnI_5q14.2h	L1FLnI	LINE	A2780	AZA	233.924	3.25158
L1FLnI_8q22.1z	L1FLnI	LINE	A2780	AZA	30.7284	-0.372902
L1FLnI_6q14.1sa	L1FLnI	LINE	A2780	AZA	28.5009	-0.635936
L1FLnI_14q23.3f	L1FLnI	LINE	A2780	AZA	22.3288	-0.709934
L1FLnI_15q23l	L1FLnI	LINE	A2780	AZA	29.0818	-0.257424
L1FLnI_9q33.3f	L1FLnI	LINE	A2780	AZA	33.3066	-0.257424
L1FLnI_9q22.33b	L1FLnI	LINE	A2780	AZA	31.0052	-0.345421
L1FLnI_1q25.3g	L1FLnI	LINE	A2780	AZA	22.6568	-2.34541
L1FLnI_Xq11.1w	L1FLnI	LINE	A2780	AZA	30.7001	-0.345421
L1FLnI_1p22.3b	L1FLnI	LINE	A2780	AZA	48.3358	1.15708
L1FLnI_Xq25r	L1FLnI	LINE	A2780	AZA	34.6562	0.427169
L1FLnI_12q14.2j	L1FLnI	LINE	A2780	AZA	36.8995	0.495881
L1FLnI_11q22.3f	L1FLnI	LINE	A2780	AZA	32.1219	-0.470952
L1FLnI_11q14.2h	L1FLnI	LINE	A2780	AZA	28.1209	0.114012
L1FLnI_6q16.1ba	L1FLnI	LINE	A2780	AZA	31.3782	0.27907
L1FLnI_1p21.3x	L1FLnI	LINE	A2780	AZA	24.2557	-1.93038
L1FLnI_2q33.1w	L1FLnI	LINE	A2780	AZA	33.9273	-0.286528
L1FLnI_18p11.31p	L1FLnI	LINE	A2780	AZA	28.1486	-1.02349
L1FLnI_7q31.2i	L1FLnI	LINE	A2780	AZA	32.7439	-0.229944
L1FLnI_9p22.2d	L1FLnI	LINE	A2780	AZA	37.4672	0.11401
L1FLnI_Xp11.21fc	L1FLnI	LINE	A2780	AZA	27.826	-0.470951
L1FLnI_14q24.3c	L1FLnI	LINE	A2780	AZA	29.9256	-0.0234925
L1FLnI_4q13.2j	L1FLnI	LINE	A2780	AZA	31.7114	-0.470952
L1FLnI_5p12b	L1FLnI	LINE	A2780	AZA	24.4218	-0.842918
L1FLnI_Xp22.11a	L1FLnI	LINE	A2780	AZA	31.0094	-0.538065
L1FLnI_Xq13.3r	L1FLnI	LINE	A2780	AZA	25.882	-0.902367
L1FLnI_1p11.2c	L1FLnI	LINE	A2780	AZA	47.0176	-0.580438
L1FLnI_9q33.1e	L1FLnI	LINE	A2780	AZA	48.2995	0.955611
L1FLnI_16p11.2k	L1FLnI	LINE	A2780	AZA	39.0861	0.307084
L1FLnI_10p11.22m	L1FLnI	LINE	A2780	AZA	47.1541	0.741486
L1FLnI_7q22.3b	L1FLnI	LINE	A2780	AZA	64.5949	1.30708
L1FLnI_5q12.3n	L1FLnI	LINE	A2780	AZA	32.9435	0.142025
L1FLnI_15q25.2d	L1FLnI	LINE	A2780	AZA	29.8482	-0.442937
L1FLnI_2q31.3n	L1FLnI	LINE	A2780	AZA	25.9251	-1.3174
L1FLnI_1q31.2k	L1FLnI	LINE	A2780	AZA	84.9707	1.90498
L1FLnI_9q33.3c	L1FLnI	LINE	A2780	AZA	30.1712	-0.732444
L1FLnI_3p21.2i	L1FLnI	LINE	A2780	AZA	34.959	-0.0950142
L1FLnI_18p11.31m	L1FLnI	LINE	A2780	AZA	38.4096	-0.814905
L1FLnI_4q21.3d	L1FLnI	LINE	A2780	AZA	29.5292	-0.580439
L1FLnI_10q21.1ta	L1FLnI	LINE	A2780	AZA	27.1976	-1.90236
L1FLnI_17q24.3f	L1FLnI	LINE	A2780	AZA	26.1285	-2.31739
L1FLnI_6q23.2k	L1FLnI	LINE	A2780	AZA	52.6613	0.82555
L1FLnI_7q21.12g	L1FLnI	LINE	A2780	AZA	30.1028	-0.0158191
L1FLnI_22q11.1c	L1FLnI	LINE	A2780	AZA	24.995	-0.066434
L1FLnI_Xq11.1l	L1FLnI	LINE	A2780	AZA	29.4774	-0.966908
L1FLnI_10q23.31d	L1FLnI	LINE	A2780	AZA	32.7855	-0.414368
L1FLnI_11p14.3i	L1FLnI	LINE	A2780	AZA	21.3832	-1.17336
L1FLnI_6q26d	L1FLnI	LINE	A2780	AZA	32.9808	-0.229944
L1FLnI_2q32.2c	L1FLnI	LINE	A2780	AZA	48.0216	0.483752
L1FLnI_Xq11.1j	L1FLnI	LINE	A2780	AZA	26.5374	-0.703873
L1FLnI_21q21.1ea	L1FLnI	LINE	A2780	AZA	393.802	4.15407
L1FLnI_18q11.2c	L1FLnI	LINE	A2780	AZA	29.434	-0.321092
L1FLnI_Xq26.2m	L1FLnI	LINE	A2780	AZA	30.2313	-0.844653
L1FLnI_2q31.2f	L1FLnI	LINE	A2780	AZA	19.0495	-1.52272
L1FLnI_9q22.32f	L1FLnI	LINE	A2780	AZA	30.9827	-0.037299
L1FLnI_7q32.2b	L1FLnI	LINE	A2780	AZA	35.8316	0.0622363
L1FLnI_12q23.1ga	L1FLnI	LINE	A2780	AZA	23.6514	-0.596724
L1FLnI_Xq21.33na	L1FLnI	LINE	A2780	AZA	19.458	-1.25968
L1FLnI_10p11.22p	L1FLnI	LINE	A2780	AZA	34.3498	0.0133268
L1FLnI_8q11.23k	L1FLnI	LINE	A2780	AZA	32.3501	0.155346
L1FLnI_11p15.4d	L1FLnI	LINE	A2780	AZA	37.261	0.284629
L1FLnI_10q21.1n	L1FLnI	LINE	A2780	AZA	52.615	0.547663
L1FLnI_5q11.2g	L1FLnI	LINE	A2780	AZA	28.8527	-1.0373
L1FLnI_9p22.3l	L1FLnI	LINE	A2780	AZA	32.7695	0.013327
L1FLnI_2p16.2c	L1FLnI	LINE	A2780	AZA	41.3455	0.155346
L1FLnI_13q12.3l	L1FLnI	LINE	A2780	AZA	31.7208	-0.259691
L1FLnI_15q21.1m	L1FLnI	LINE	A2780	AZA	28.1623	-1.0373
L1FLnI_15q21.1k	L1FLnI	LINE	A2780	AZA	27.0221	-1.38522
L1FLnI_11p15.1c	L1FLnI	LINE	A2780	AZA	22.3387	-1.25969
L1FLnI_20p12.1p	L1FLnI	LINE	A2780	AZA	44.9156	0.58161
L1FLnI_3q29h	L1FLnI	LINE	A2780	AZA	28.9021	-0.200797
L1FLnI_14q12la	L1FLnI	LINE	A2780	AZA	22.6003	-1.14421
L1FLnI_15q21.1l	L1FLnI	LINE	A2780	AZA	26.4829	-1.67472
L1FLnI_12q23.1ea	L1FLnI	LINE	A2780	AZA	34.9115	-0.0897666
L1FLnI_3q22.3g	L1FLnI	LINE	A2780	AZA	31.5974	0.314377
L1FLnI_11q22.3u	L1FLnI	LINE	A2780	AZA	28.2266	-0.422588
L1FLnI_3p22.3c	L1FLnI	LINE	A2780	AZA	30.6932	0.0919839
L1FLnI_6q12g	L1FLnI	LINE	A2780	AZA	20.3372	-2.49297
L1FLnI_10p13d	L1FLnI	LINE	A2780	AZA	27.5379	-0.814906
L1FLnI_1q21.3a	L1FLnI	LINE	A2780	AZA	40.5163	0.770055
L1FLnI_12q23.3f	L1FLnI	LINE	A2780	AZA	37.7033	0.43302
L1FLnI_2q32.3da	L1FLnI	LINE	A2780	AZA	33.6707	0.272556
L1FLnI_4q12fb	L1FLnI	LINE	A2780	AZA	29.4727	-0.060019
L1FLnI_8q13.3h	L1FLnI	LINE	A2780	AZA	25.9766	-0.422588
L1FLnI_Xq13.3u	L1FLnI	LINE	A2780	AZA	19.1755	-0.908012
L1FLnI_7q22.3f	L1FLnI	LINE	A2780	AZA	28.7482	0.0919845
L1FLnI_10q21.3c	L1FLnI	LINE	A2780	AZA	32.1796	0.139291
L1FLnI_9q21.32m	L1FLnI	LINE	A2780	AZA	45.2789	0.43302
L1FLnI_1q42.13f	L1FLnI	LINE	A2780	AZA	18.8747	-1.22993
L1FLnI_13q13.3q	L1FLnI	LINE	A2780	AZA	35.5785	0.0919836
L1FLnI_10p12.2c	L1FLnI	LINE	A2780	AZA	32.0049	-0.00755178
L1FLnI_18p11.31l	L1FLnI	LINE	A2780	AZA	29.0604	-0.536605
L1FLnI_9p23e	L1FLnI	LINE	A2780	AZA	22.5696	-0.536604
L1FLnI_12q23.3v	L1FLnI	LINE	A2780	AZA	37.4839	0.215467
L1FLnI_3q26.32n	L1FLnI	LINE	A2780	AZA	43.3909	0.573018
L1FLnI_21p11.2f	L1FLnI	LINE	A2780	AZA	38.101	0.259861
L1FLnI_10p12.31i	L1FLnI	LINE	A2780	AZA	24.4038	-1.08409
L1FLnI_4q22.1o	L1FLnI	LINE	A2780	AZA	39.3696	0.344749
L1FLnI_5p13.1da	L1FLnI	LINE	A2780	AZA	22.003	-0.614606
L1FLnI_Xq13.3aa	L1FLnI	LINE	A2780	AZA	19.2429	-1.4626
L1FLnI_Xp11.21tb	L1FLnI	LINE	A2780	AZA	21.9996	-1.78453
L1FLnI_13q14.3p	L1FLnI	LINE	A2780	AZA	63.3712	1.70732
L1FLnI_1q31.1z	L1FLnI	LINE	A2780	AZA	26.819	-1.08409
L1FLnI_Xp11.21sc	L1FLnI	LINE	A2780	AZA	29.0797	-0.0296453
L1FLnI_9p24.2b	L1FLnI	LINE	A2780	AZA	24.4522	-0.877639
L1FLnI_Xq24r	L1FLnI	LINE	A2780	AZA	18.1332	-1.08407
L1FLnI_20q11.1g	L1FLnI	LINE	A2780	AZA	24.4957	-0.977176
L1FLnI_12q13.11l	L1FLnI	LINE	A2780	AZA	30.5557	-0.168543
L1FLnI_6q21m	L1FLnI	LINE	A2780	AZA	34.2898	-0.0530666
L1FLnI_5q13.3c	L1FLnI	LINE	A2780	AZA	23.1147	-0.58358
L1FLnI_2q31.3o	L1FLnI	LINE	A2780	AZA	28.1147	-0.583579
L1FLnI_Xq13.2ka	L1FLnI	LINE	A2780	AZA	24.0414	-0.505577
L1FLnI_Xq21.1we	L1FLnI	LINE	A2780	AZA	19.4488	-1.16854
L1FLnI_4q27h	L1FLnI	LINE	A2780	AZA	20.107	-1.29407
L1FLnI_4q25fa	L1FLnI	LINE	A2780	AZA	30.5511	-0.168544
L1FLnI_3q24z	L1FLnI	LINE	A2780	AZA	31.7829	-0.10965
L1FLnI_2p14v	L1FLnI	LINE	A2780	AZA	64.3901	1.17723
L1FLnI_12q23.3p	L1FLnI	LINE	A2780	AZA	25.8229	-0.94615
L1FLnI_6q24.3c	L1FLnI	LINE	A2780	AZA	16.1116	-1.29407
L1FLnI_Xq21.1oc	L1FLnI	LINE	A2780	AZA	28.2944	-0.0530662
L1FLnI_2p13.1b	L1FLnI	LINE	A2780	AZA	27.5673	-0.109649
L1FLnI_15q22.2h	L1FLnI	LINE	A2780	AZA	39.2154	0.455947
L1FLnI_12p13.2l	L1FLnI	LINE	A2780	AZA	24.3173	-0.109649
L1FLnI_4q28.2g	L1FLnI	LINE	A2780	AZA	29.3936	0.20069
L1FLnI_7p21.3i	L1FLnI	LINE	A2780	AZA	35.9834	-0.94615
L1FLnI_16q22.1	L1FLnI	LINE	A2780	AZA	22.5968	-0.294073
L1FLnI_14q21.1l	L1FLnI	LINE	A2780	AZA	39.7045	0.638811
L1FLnI_4q22.1w	L1FLnI	LINE	A2780	AZA	28.4309	-0.753503
L1FLnI_6q22.1z	L1FLnI	LINE	A2780	AZA	22.8762	-0.505576
L1FLnI_1q44d	L1FLnI	LINE	A2780	AZA	21.9468	-0.329478
L1FLnI_4q23k	L1FLnI	LINE	A2780	AZA	16.212	-1.02135
L1FLnI_4q28.2e	L1FLnI	LINE	A2780	AZA	43.5689	0.801764
L1FLnI_14q21.1t	L1FLnI	LINE	A2780	AZA	29.1774	0.278203
L1FLnI_13q31.3g	L1FLnI	LINE	A2780	AZA	44.5327	0.950627
L1FLnI_2p15n	L1FLnI	LINE	A2780	AZA	28.9018	0.136184
L1FLnI_Xq11.2qa	L1FLnI	LINE	A2780	AZA	22.3911	-0.814905
L1FLnI_1q25.3i	L1FLnI	LINE	A2780	AZA	39.476	0.448128
L1FLnI_6q22.1y	L1FLnI	LINE	A2780	AZA	24.3142	-0.0779401
L1FLnI_15q21.1c	L1FLnI	LINE	A2780	AZA	30.2328	0.407486
L1FLnI_7q21.11ea	L1FLnI	LINE	A2780	AZA	23.5376	-1.02136
L1FLnI_1p32.1e	L1FLnI	LINE	A2780	AZA	32.7921	0.278203
L1FLnI_Xq21.1ve	L1FLnI	LINE	A2780	AZA	22.093	-0.721796
L1FLnI_4q12ba	L1FLnI	LINE	A2780	AZA	39.3867	0.487656
L1FLnI_4q35.2h	L1FLnI	LINE	A2780	AZA	29.479	-0.262365
L1FLnI_9p21.1la	L1FLnI	LINE	A2780	AZA	39.1645	0.834186
L1FLnI_4q13.3ta	L1FLnI	LINE	A2780	AZA	22.9073	-0.165813
L1FLnI_7q22.1g	L1FLnI	LINE	A2780	AZA	26.34	-0.689375
L1FLnI_12q12u	L1FLnI	LINE	A2780	AZA	32.9724	0.26482
L1FLnI_2p25.3i	L1FLnI	LINE	A2780	AZA	19.9845	-0.689373
L1FLnI_5q12.1s	L1FLnI	LINE	A2780	AZA	36.0046	0.310624
L1FLnI_11p14.1p	L1FLnI	LINE	A2780	AZA	43.474	0.802477
L1FLnI_6q21s	L1FLnI	LINE	A2780	AZA	37.8362	0.770055
L1FLnI_Xq26.2j	L1FLnI	LINE	A2780	AZA	28.9073	-0.165813
L1FLnI_8p22i	L1FLnI	LINE	A2780	AZA	44.4393	0.736888
L1FLI_7q31.1a	L1FLI	LINE	A2780	AZA	23.0213	-0.60191
L1FLnI_2q24.1ma	L1FLnI	LINE	A2780	AZA	36.9088	0.520077
L1FLnI_19p13.2a	L1FLnI	LINE	A2780	AZA	19.4105	-1.22994
L1FLnI_Xp11.21rc	L1FLnI	LINE	A2780	AZA	31.9373	0.802478
L1FLnI_Xq21.1uc	L1FLnI	LINE	A2780	AZA	22.8412	-0.955767
L1FLnI_1q24.1a	L1FLnI	LINE	A2780	AZA	23.4523	-0.196776
L1FLnI_1q25.1l	L1FLnI	LINE	A2780	AZA	26.7159	-0.263891
L1FLnI_7p15.2g	L1FLnI	LINE	A2780	AZA	23.1539	-0.33428
L1FLnI_4p15.2x	L1FLnI	LINE	A2780	AZA	30.34	-0.132647
L1FLnI_7p14.2f	L1FLnI	LINE	A2780	AZA	23.8938	-1.07124
L1FLnI_8q24.21l	L1FLnI	LINE	A2780	AZA	57.8518	1.40988
L1FLnI_14q23.1s	L1FLnI	LINE	A2780	AZA	21.3236	-0.334279
L1FLnI_3p22.1r	L1FLnI	LINE	A2780	AZA	22.7129	-0.848852
L1FLnI_13q12.12c	L1FLnI	LINE	A2780	AZA	25.7388	-0.33428
L1FLnI_3p25.1j	L1FLnI	LINE	A2780	AZA	18.3679	-2.07123
L1FLnI_14q21.1y	L1FLnI	LINE	A2780	AZA	33.3407	0.201772
L1FLnI_8q13.3m	L1FLnI	LINE	A2780	AZA	26.514	-0.33428
L1FLnI_Xq25zb	L1FLnI	LINE	A2780	AZA	23.258	0.151148
L1FLnI_3p26.2a	L1FLnI	LINE	A2780	AZA	28.1437	0.297988
L1FLnI_Xq21.31ka	L1FLnI	LINE	A2780	AZA	150.228	3.53361
L1FLnI_2p16.1v	L1FLnI	LINE	A2780	AZA	28.3155	0.201772
L1FLnI_2p15p	L1FLnI	LINE	A2780	AZA	27.9291	-0.334281
L1FLnI_21q21.1e	L1FLnI	LINE	A2780	AZA	22.4474	-0.408279
L1FLnI_11q21i	L1FLnI	LINE	A2780	AZA	29.1941	0.297987
L1FLnI_3p26.1b	L1FLnI	LINE	A2780	AZA	18.7907	-0.955764
L1FLnI_12p11.23b	L1FLnI	LINE	A2780	AZA	42.3608	0.835644
L1FLnI_14q13.3b	L1FLnI	LINE	A2780	AZA	50.0697	0.898379
L1FLnI_9q21.11b	L1FLnI	LINE	A2780	AZA	32.074	0.284629
L1FLnI_3q26.2i	L1FLnI	LINE	A2780	AZA	31.6795	0.284629
L1FLnI_3q11.2w	L1FLnI	LINE	A2780	AZA	30.4533	0.625666
L1FLI_3p14.1	L1FLI	LINE	A2780	AZA	28.8458	-0.300333
L1FLnI_4q24ea	L1FLnI	LINE	A2780	AZA	32.1304	-0.16283
L1FLnI_11p14.1c	L1FLnI	LINE	A2780	AZA	23.2354	-0.534798
L1FLnI_7p13a	L1FLnI	LINE	A2780	AZA	35.6282	0.804003
L1FLnI_3q26.2c	L1FLnI	LINE	A2780	AZA	23.0513	-1.0373
L1FLnI_4q24da	L1FLnI	LINE	A2780	AZA	20.9893	-1.16283
L1FLnI_Xq13.3k	L1FLnI	LINE	A2780	AZA	31.1171	0.0781779
L1FLnI_3p26.2b	L1FLnI	LINE	A2780	AZA	23.1548	-0.814905
L1FLnI_12q22e	L1FLnI	LINE	A2780	AZA	72.5418	1.52748
L1FLnI_11p15.1w	L1FLnI	LINE	A2780	AZA	19.6951	-2.03729
L1FLnI_4q28.3aa	L1FLnI	LINE	A2780	AZA	25.4927	-0.229944
L1FLnI_9q31.1m	L1FLnI	LINE	A2780	AZA	19.1769	-1.8149
L1FLnI_9p11.1b	L1FLnI	LINE	A2780	AZA	6.89556	-7.02948
L1FLnI_Xq22.3b	L1FLnI	LINE	A2780	AZA	21.8772	-0.265566
L1FLnI_3p25.3c	L1FLnI	LINE	A2780	AZA	31.8395	0.412503
L1FLnI_Xq13.3ba	L1FLnI	LINE	A2780	AZA	19.1304	-1.58749
L1FLnI_12q15n	L1FLnI	LINE	A2780	AZA	18.2587	-1.78014
L1FLnI_20p12.1k	L1FLnI	LINE	A2780	AZA	24.7691	-0.417571
L1FLnI_1q31.3o	L1FLnI	LINE	A2780	AZA	23.0791	-0.195178
L1FLnI_15q24.3i	L1FLnI	LINE	A2780	AZA	29.3143	0.412504
L1FLnI_2p15m	L1FLnI	LINE	A2780	AZA	28.8097	0.412504
L1FLnI_16q21ia	L1FLnI	LINE	A2780	AZA	15.4436	-1.9669
L1FLnI_Xq13.3x	L1FLnI	LINE	A2780	AZA	19.9152	-0.381943
L1FLnI_8q22.1da	L1FLnI	LINE	A2780	AZA	17.385	-0.644979
L1FLnI_9p24.3a	L1FLnI	LINE	A2780	AZA	28.98	-0.0283103
L1FLnI_8q24.21q	L1FLnI	LINE	A2780	AZA	29.3663	0.448127
L1FLnI_7p21.3c	L1FLnI	LINE	A2780	AZA	29.2877	0.203015
[truncated: 270,747+ more rows]

## Sheet: Table S7-OVCA Telescope Counts
Table S7 - OVCA Treatment vs Mock Count of Cell Lines - Telescope Upregulated Loci
locus	class	treatment_f	count
L1FLnI_10q23.1u	LINE	AZA	4
L1FLnI_10q23.31t	LINE	AZA	4
L1FLnI_10q23.33g	LINE	AZA	4
L1FLnI_11p11.12g	LINE	AZA	4
L1FLnI_11p11.2d	LINE	AZA	4
L1FLnI_11p12i	LINE	AZA	4
L1FLnI_11p13j	LINE	AZA	4
L1FLnI_11p13r	LINE	AZA	4
L1FLnI_11p13w	LINE	AZA	4
L1FLnI_11p15.3a	LINE	AZA	4
L1FLnI_11p15.3n	LINE	AZA	4
L1FLnI_11p15.4o	LINE	AZA	4
L1FLnI_11p15.4t	LINE	AZA	4
L1FLnI_11q12.1m	LINE	AZA	4
L1FLnI_11q12.3c	LINE	AZA	4
L1FLnI_11q13.5g	LINE	AZA	4
L1FLnI_11q14.3e	LINE	AZA	4
L1FLnI_11q22.1ma	LINE	AZA	4
L1FLnI_11q22.3k	LINE	AZA	4
L1FLnI_12p12.3ga	LINE	AZA	4
L1FLnI_12p12.3p	LINE	AZA	4
L1FLnI_12p13.1d	LINE	AZA	4
L1FLnI_12q11b	LINE	AZA	4
L1FLnI_12q12o	LINE	AZA	4
L1FLnI_12q12p	LINE	AZA	4
L1FLnI_12q13.3a	LINE	AZA	4
L1FLnI_12q21.32e	LINE	AZA	4
L1FLnI_12q21.32s	LINE	AZA	4
L1FLnI_12q21.32t	LINE	AZA	4
L1FLnI_13q21.2g	LINE	AZA	4
L1FLnI_13q21.32j	LINE	AZA	4
L1FLnI_13q31.3c	LINE	AZA	4
L1FLnI_13q33.1g	LINE	AZA	4
L1FLnI_14q12aa	LINE	AZA	4
L1FLnI_14q12ha	LINE	AZA	4
L1FLnI_14q21.3e	LINE	AZA	4
L1FLnI_14q21.3w	LINE	AZA	4
L1FLnI_14q22.2d	LINE	AZA	4
L1FLnI_15q11.2b	LINE	AZA	4
L1FLnI_18p11.32o	LINE	AZA	4
L1FLnI_18p11.32p	LINE	AZA	4
L1FLnI_18q23a	LINE	AZA	4
L1FLnI_1p21.1g	LINE	AZA	4
L1FLnI_1p22.1e	LINE	AZA	4
L1FLnI_1p22.2k	LINE	AZA	4
L1FLnI_1p22.2s	LINE	AZA	4
L1FLnI_1p31.1ha	LINE	AZA	4
L1FLnI_1p31.1hb	LINE	AZA	4
L1FLnI_1p31.1rb	LINE	AZA	4
L1FLnI_1p31.1s	LINE	AZA	4
L1FLnI_1p31.1t	LINE	AZA	4
L1FLnI_1q23.1k	LINE	AZA	4
L1FLnI_1q31.1k	LINE	AZA	4
L1FLnI_1q31.3f	LINE	AZA	4
L1FLnI_1q42.2h	LINE	AZA	4
L1FLnI_1q43l	LINE	AZA	4
L1FLnI_20p11.21p	LINE	AZA	4
L1FLnI_20q13.2a	LINE	AZA	4
L1FLnI_21q21.1p	LINE	AZA	4
L1FLnI_22q12.3h	LINE	AZA	4
L1FLnI_2p11.1b	LINE	AZA	4
L1FLnI_2p12t	LINE	AZA	4
L1FLnI_2p16.1f	LINE	AZA	4
L1FLnI_2p23.1j	LINE	AZA	4
L1FLnI_2p23.1k	LINE	AZA	4
L1FLnI_2q14.3ka	LINE	AZA	4
L1FLnI_2q22.3e	LINE	AZA	4
L1FLnI_2q22.3n	LINE	AZA	4
L1FLnI_2q24.1p	LINE	AZA	4
L1FLnI_2q24.1s	LINE	AZA	4
L1FLnI_2q24.1x	LINE	AZA	4
L1FLnI_2q24.1y	LINE	AZA	4
L1FLnI_2q24.3t	LINE	AZA	4
L1FLnI_2q32.1oa	LINE	AZA	4
L1FLnI_2q32.3k	LINE	AZA	4
L1FLnI_2q33.1m	LINE	AZA	4
L1FLnI_2q33.3h	LINE	AZA	4
L1FLnI_3p11.1m	LINE	AZA	4
L1FLnI_3p12.2e	LINE	AZA	4
L1FLnI_3p22.3k	LINE	AZA	4
L1FLnI_3q12.3i	LINE	AZA	4
L1FLnI_3q13.13o	LINE	AZA	4
L1FLnI_3q13.13p	LINE	AZA	4
L1FLnI_3q13.13q	LINE	AZA	4
L1FLnI_3q13.32c	LINE	AZA	4
L1FLnI_3q13.32d	LINE	AZA	4
L1FLnI_3q13.32e	LINE	AZA	4
L1FLnI_3q13.32f	LINE	AZA	4
L1FLnI_3q26.2l	LINE	AZA	4
L1FLnI_3q28m	LINE	AZA	4
L1FLnI_3q28o	LINE	AZA	4
L1FLnI_4p12n	LINE	AZA	4
L1FLnI_4p14b	LINE	AZA	4
L1FLnI_4p15.2m	LINE	AZA	4
L1FLnI_4p15.2p	LINE	AZA	4
L1FLnI_4p15.32h	LINE	AZA	4
L1FLnI_4p16.2i	LINE	AZA	4
L1FLnI_4q21.21i	LINE	AZA	4
L1FLnI_4q22.1ma	LINE	AZA	4
L1FLnI_4q22.3q	LINE	AZA	4
L1FLnI_4q26h	LINE	AZA	4
L1FLnI_4q26qa	LINE	AZA	4
L1FLnI_4q28.3g	LINE	AZA	4
L1FLnI_4q28.3h	LINE	AZA	4
L1FLnI_4q28.3qa	LINE	AZA	4
L1FLnI_4q28.3wa	LINE	AZA	4
L1FLnI_4q31.21k	LINE	AZA	4
L1FLnI_4q31.23g	LINE	AZA	4
L1FLnI_4q32.1m	LINE	AZA	4
L1FLnI_4q32.1t	LINE	AZA	4
L1FLnI_4q32.3r	LINE	AZA	4
L1FLnI_4q35.2b	LINE	AZA	4
L1FLnI_5p12fa	LINE	AZA	4
L1FLnI_5p13.3u	LINE	AZA	4
L1FLnI_5p13.3x	LINE	AZA	4
L1FLnI_5p15.2o	LINE	AZA	4
L1FLnI_5q12.1q	LINE	AZA	4
L1FLnI_5q12.1r	LINE	AZA	4
L1FLnI_5q14.2d	LINE	AZA	4
L1FLnI_5q14.3eb	LINE	AZA	4
L1FLnI_5q14.3j	LINE	AZA	4
L1FLnI_5q14.3w	LINE	AZA	4
L1FLnI_5q14.3x	LINE	AZA	4
L1FLnI_5q14.3ya	LINE	AZA	4
L1FLnI_5q21.3b	LINE	AZA	4
L1FLnI_5q23.1r	LINE	AZA	4
L1FLnI_5q23.2d	LINE	AZA	4
L1FLnI_5q23.2h	LINE	AZA	4
L1FLnI_5q23.3l	LINE	AZA	4
L1FLnI_5q31.1h	LINE	AZA	4
L1FLnI_5q31.1k	LINE	AZA	4
L1FLnI_5q34b	LINE	AZA	4
L1FLnI_6p22.3i	LINE	AZA	4
L1FLnI_6p22.3v	LINE	AZA	4
L1FLnI_6p25.2e	LINE	AZA	4
L1FLnI_6q14.1s	LINE	AZA	4
L1FLnI_6q14.3ga	LINE	AZA	4
L1FLnI_6q15n	LINE	AZA	4
L1FLnI_6q15o	LINE	AZA	4
L1FLnI_6q16.1b	LINE	AZA	4
L1FLnI_6q22.31ja	LINE	AZA	4
L1FLnI_6q22.31u	LINE	AZA	4
L1FLnI_6q22.31z	LINE	AZA	4
L1FLnI_6q24.1l	LINE	AZA	4
L1FLnI_6q24.1n	LINE	AZA	4
L1FLnI_6q24.1o	LINE	AZA	4
L1FLnI_7p14.1e	LINE	AZA	4
L1FLnI_7p21.1e	LINE	AZA	4
L1FLnI_7p21.1s	LINE	AZA	4
L1FLnI_7p21.3ha	LINE	AZA	4
L1FLnI_7p21.3ka	LINE	AZA	4
L1FLnI_7p21.3na	LINE	AZA	4
L1FLnI_7p21.3oa	LINE	AZA	4
L1FLnI_7p21.3qa	LINE	AZA	4
L1FLnI_7p21.3ta	LINE	AZA	4
L1FLnI_7q21.11qa	LINE	AZA	4
L1FLnI_7q21.12b	LINE	AZA	4
L1FLnI_7q21.13c	LINE	AZA	4
L1FLnI_7q31.1qa	LINE	AZA	4
L1FLnI_7q31.31i	LINE	AZA	4
L1FLnI_7q31.31j	LINE	AZA	4
L1FLnI_7q35m	LINE	AZA	4
L1FLnI_8p21.3d	LINE	AZA	4
L1FLnI_8q12.3y	LINE	AZA	4
L1FLnI_8q21.13a	LINE	AZA	4
L1FLnI_8q21.13v	LINE	AZA	4
L1FLnI_8q21.13w	LINE	AZA	4
L1FLnI_8q23.3d	LINE	AZA	4
L1FLnI_8q24.13k	LINE	AZA	4
L1FLnI_8q24.23j	LINE	AZA	4
L1FLnI_9p23ba	LINE	AZA	4
L1FLnI_9p23z	LINE	AZA	4
L1FLnI_9q21.13l	LINE	AZA	4
L1FLnI_9q21.13w	LINE	AZA	4
L1FLnI_9q21.32o	LINE	AZA	4
L1FLnI_9q21.33o	LINE	AZA	4
L1FLnI_9q22.31h	LINE	AZA	4
L1FLnI_9q33.1a	LINE	AZA	4
L1FLnI_9q33.1b	LINE	AZA	4
L1FLnI_Xp21.2a	LINE	AZA	4
L1FLnI_Xq13.1x	LINE	AZA	4
L1FLnI_Xq13.1z	LINE	AZA	4
L1FLnI_Xq21.1yc	LINE	AZA	4
L1FLnI_Xq21.33da	LINE	AZA	4
L1FLnI_Xq21.33ga	LINE	AZA	4
L1FLnI_Xq22.3w	LINE	AZA	4
L1FLnI_Xq23ta	LINE	AZA	4
L1FLnI_Xq23w	LINE	AZA	4
L1FLnI_Xq25t	LINE	AZA	4
L1FLnI_Xq26.3b	LINE	AZA	4
L1FLnI_Xq26.3z	LINE	AZA	4
L1FLnI_Xq27.3t	LINE	AZA	4
L1FLnI_Xq28ba	LINE	AZA	4
L1FLnI_Xq28da	LINE	AZA	4
L1FLnI_Xq28fa	LINE	AZA	4
L1FLnI_Xq28y	LINE	AZA	4
L1FLnI_Yq11.223l	LINE	AZA	4
ERV316A3_11p13b	LTR	AZA	4
ERV316A3_11q22.3e	LTR	AZA	4
ERV316A3_12p11.22a	LTR	AZA	4
ERV316A3_22q13.1	LTR	AZA	4
ERV316A3_2p24.3c	LTR	AZA	4
ERV316A3_3p24.2	LTR	AZA	4
ERV316A3_4q22.1b	LTR	AZA	4
ERV316A3_6p21.33c	LTR	AZA	4
ERV316A3_6p22.1a	LTR	AZA	4
ERV316A3_6p25.1a	LTR	AZA	4
ERVL_10q24.31	LTR	AZA	4
ERVL_2p12b	LTR	AZA	4
ERVLB4_10q23.33c	LTR	AZA	4
ERVLB4_2q31.1	LTR	AZA	4
ERVLB4_2q32.3	LTR	AZA	4
ERVLB4_6q22.31c	LTR	AZA	4
ERVLE_12p12.3c	LTR	AZA	4
ERVLE_12p13.1a	LTR	AZA	4
ERVLE_1q21.2b	LTR	AZA	4
ERVLE_2q32.2c	LTR	AZA	4
ERVLE_3q13.32	LTR	AZA	4
ERVLE_6p22.3c	LTR	AZA	4
ERVLE_6q14.1g	LTR	AZA	4
ERVLE_Xp11.4b	LTR	AZA	4
ERVLE_Xq26.2c	LTR	AZA	4
HARLEQUIN_12q13.12	LTR	AZA	4
HERV9_10q23.33	LTR	AZA	4
HERV9_5q31.2	LTR	AZA	4
HERV9_6q22.1	LTR	AZA	4
HERVE_2p13.3b	LTR	AZA	4
HERVE_5q14.3a	LTR	AZA	4
HERVE_8p12a	LTR	AZA	4
HERVEA_12q21.1	LTR	AZA	4
HERVEA_Xp11.21	LTR	AZA	4
HERVFRD_4p15.32	LTR	AZA	4
HERVH_6q12f	LTR	AZA	4
HERVH48_7q22.1	LTR	AZA	4
HERVIP10F_2q11.2	LTR	AZA	4
HERVIP10F_6p25.1	LTR	AZA	4
HERVL_10q23.33b	LTR	AZA	4
HERVL_11q24.1	LTR	AZA	4
HERVL_13q33.1a	LTR	AZA	4
HERVL_14q12b	LTR	AZA	4
HERVL_18p11.32a	LTR	AZA	4
HERVL_1q31.2d	LTR	AZA	4
HERVL_2p12e	LTR	AZA	4
HERVL_2q32.1f	LTR	AZA	4
HERVL_3q13.32	LTR	AZA	4
HERVL_4p15.1d	LTR	AZA	4
HERVL_4q28.3a	LTR	AZA	4
HERVL_4q28.3b	LTR	AZA	4
HERVL_5q33.1a	LTR	AZA	4
HERVL_6p22.3b	LTR	AZA	4
HERVL_6q24.1c	LTR	AZA	4
HERVL_Xq24c	LTR	AZA	4
HERVL40_3q13.13b	LTR	AZA	4
HERVL40_8q11.23b	LTR	AZA	4
HERVL74_10q21.1	LTR	AZA	4
HERVL74_7p21.3	LTR	AZA	4
HERVW_6q22.1	LTR	AZA	4
HML5_4q32.1b	LTR	AZA	4
HML5_6p22.3	LTR	AZA	4
HML5_Xp21.3	LTR	AZA	4
HUERSP1_8q21.13	LTR	AZA	4
HUERSP3B_11q24.2	LTR	AZA	4
HUERSP3B_6p22.3b	LTR	AZA	4
MER4_1q25.1a	LTR	AZA	4
MER4_1q25.1b	LTR	AZA	4
MER4_1q44a	LTR	AZA	4
MER4_4q22.1	LTR	AZA	4
MER4_9p13.3d	LTR	AZA	4
MER4_Xq28a	LTR	AZA	4
MER41_14q12	LTR	AZA	4
MER41_2p16.3b	LTR	AZA	4
MER41_3q13.32	LTR	AZA	4
MER61_2q32.3a	LTR	AZA	4
PABLA_7q32.1	LTR	AZA	4
PRIMA41_12p11.21	LTR	AZA	4
L1FLI_8q21.11a	LINE	AZA/ITF	4
L1FLnI_10p11.21l	LINE	AZA/ITF	4
L1FLnI_10p12.31q	LINE	AZA/ITF	4
L1FLnI_10p15.2	LINE	AZA/ITF	4
L1FLnI_10q21.1qa	LINE	AZA/ITF	4
L1FLnI_10q21.1z	LINE	AZA/ITF	4
L1FLnI_10q23.33r	LINE	AZA/ITF	4
L1FLnI_10q25.1h	LINE	AZA/ITF	4
L1FLnI_10q25.2h	LINE	AZA/ITF	4
L1FLnI_11p11.2d	LINE	AZA/ITF	4
L1FLnI_11p13i	LINE	AZA/ITF	4
L1FLnI_11p13j	LINE	AZA/ITF	4
L1FLnI_11p14.3da	LINE	AZA/ITF	4
L1FLnI_11p14.3ja	LINE	AZA/ITF	4
L1FLnI_11p15.3l	LINE	AZA/ITF	4
L1FLnI_11p15.4n	LINE	AZA/ITF	4
L1FLnI_11p15.4q	LINE	AZA/ITF	4
L1FLnI_11q12.1v	LINE	AZA/ITF	4
L1FLnI_11q13.5g	LINE	AZA/ITF	4
L1FLnI_11q22.1la	LINE	AZA/ITF	4
L1FLnI_11q22.3k	LINE	AZA/ITF	4
L1FLnI_12p12.3p	LINE	AZA/ITF	4
L1FLnI_12p13.31b	LINE	AZA/ITF	4
L1FLnI_12q12o	LINE	AZA/ITF	4
L1FLnI_12q12p	LINE	AZA/ITF	4
L1FLnI_12q14.2g	LINE	AZA/ITF	4
L1FLnI_12q21.1aa	LINE	AZA/ITF	4
L1FLnI_12q21.32b	LINE	AZA/ITF	4
L1FLnI_12q21.32e	LINE	AZA/ITF	4
L1FLnI_12q21.32h	LINE	AZA/ITF	4
L1FLnI_12q21.32l	LINE	AZA/ITF	4
L1FLnI_12q21.32s	LINE	AZA/ITF	4
L1FLnI_12q21.32t	LINE	AZA/ITF	4
L1FLnI_12q21.33m	LINE	AZA/ITF	4
L1FLnI_13q11a	LINE	AZA/ITF	4
L1FLnI_13q21.1b	LINE	AZA/ITF	4
L1FLnI_13q21.32j	LINE	AZA/ITF	4
L1FLnI_13q22.2e	LINE	AZA/ITF	4
L1FLnI_13q31.1i	LINE	AZA/ITF	4
L1FLnI_13q31.1j	LINE	AZA/ITF	4
L1FLnI_13q31.1m	LINE	AZA/ITF	4
L1FLnI_13q31.1t	LINE	AZA/ITF	4
L1FLnI_13q31.1x	LINE	AZA/ITF	4
L1FLnI_14q12aa	LINE	AZA/ITF	4
L1FLnI_14q12ha	LINE	AZA/ITF	4
L1FLnI_14q21.1sa	LINE	AZA/ITF	4
L1FLnI_14q21.1va	LINE	AZA/ITF	4
L1FLnI_14q21.3e	LINE	AZA/ITF	4
L1FLnI_14q22.2a	LINE	AZA/ITF	4
L1FLnI_14q22.2c	LINE	AZA/ITF	4
L1FLnI_14q23.1c	LINE	AZA/ITF	4
L1FLnI_14q23.2d	LINE	AZA/ITF	4
L1FLnI_14q23.2e	LINE	AZA/ITF	4
L1FLnI_14q23.2i	LINE	AZA/ITF	4
L1FLnI_16p11.2a	LINE	AZA/ITF	4
L1FLnI_16q11.2d	LINE	AZA/ITF	4
L1FLnI_16q12.1h	LINE	AZA/ITF	4
L1FLnI_17p13.1a	LINE	AZA/ITF	4
L1FLnI_17p13.3d	LINE	AZA/ITF	4
L1FLnI_17q12i	LINE	AZA/ITF	4
L1FLnI_18p11.32k	LINE	AZA/ITF	4
L1FLnI_18p11.32l	LINE	AZA/ITF	4
L1FLnI_18p11.32o	LINE	AZA/ITF	4
L1FLnI_18q12.3t	LINE	AZA/ITF	4
L1FLnI_19p12i	LINE	AZA/ITF	4
L1FLnI_1p21.1c	LINE	AZA/ITF	4
L1FLnI_1p21.1g	LINE	AZA/ITF	4
L1FLnI_1p21.2l	LINE	AZA/ITF	4
L1FLnI_1p22.1e	LINE	AZA/ITF	4
L1FLnI_1p22.2s	LINE	AZA/ITF	4
L1FLnI_1p31.1s	LINE	AZA/ITF	4
L1FLnI_1p31.1t	LINE	AZA/ITF	4
L1FLnI_1p31.1u	LINE	AZA/ITF	4
L1FLnI_1p32.3i	LINE	AZA/ITF	4
L1FLnI_1p33q	LINE	AZA/ITF	4
L1FLnI_1q21.1j	LINE	AZA/ITF	4
L1FLnI_1q21.1l	LINE	AZA/ITF	4
L1FLnI_1q21.1n	LINE	AZA/ITF	4
L1FLnI_1q23.2e	LINE	AZA/ITF	4
L1FLnI_1q24.2n	LINE	AZA/ITF	4
L1FLnI_1q32.3k	LINE	AZA/ITF	4
L1FLnI_20q11.1e	LINE	AZA/ITF	4
L1FLnI_20q11.21g	LINE	AZA/ITF	4
L1FLnI_20q12a	LINE	AZA/ITF	4
L1FLnI_20q13.2a	LINE	AZA/ITF	4
L1FLnI_20q13.2c	LINE	AZA/ITF	4
L1FLnI_21q21.1da	LINE	AZA/ITF	4
L1FLnI_22p11.2e	LINE	AZA/ITF	4
L1FLnI_2p11.2a	LINE	AZA/ITF	4
L1FLnI_2p12bb	LINE	AZA/ITF	4
L1FLnI_2p12p	LINE	AZA/ITF	4
L1FLnI_2p12t	LINE	AZA/ITF	4
L1FLnI_2p12u	LINE	AZA/ITF	4
L1FLnI_2p12v	LINE	AZA/ITF	4
L1FLnI_2p12w	LINE	AZA/ITF	4
L1FLnI_2p16.1k	LINE	AZA/ITF	4
L1FLnI_2p24.1n	LINE	AZA/ITF	4
L1FLnI_2q12.3f	LINE	AZA/ITF	4
L1FLnI_2q14.3a	LINE	AZA/ITF	4
L1FLnI_2q14.3b	LINE	AZA/ITF	4
L1FLnI_2q14.3ka	LINE	AZA/ITF	4
L1FLnI_2q22.2j	LINE	AZA/ITF	4
L1FLnI_2q22.3a	LINE	AZA/ITF	4
L1FLnI_2q22.3e	LINE	AZA/ITF	4
L1FLnI_2q22.3f	LINE	AZA/ITF	4
L1FLnI_2q24.1q	LINE	AZA/ITF	4
L1FLnI_2q24.1x	LINE	AZA/ITF	4
L1FLnI_2q24.1y	LINE	AZA/ITF	4
L1FLnI_2q24.1z	LINE	AZA/ITF	4
L1FLnI_2q24.2g	LINE	AZA/ITF	4
L1FLnI_2q24.2j	LINE	AZA/ITF	4
L1FLnI_2q24.2p	LINE	AZA/ITF	4
L1FLnI_2q24.3t	LINE	AZA/ITF	4
L1FLnI_2q32.1oa	LINE	AZA/ITF	4
L1FLnI_2q32.3ba	LINE	AZA/ITF	4
L1FLnI_2q32.3k	LINE	AZA/ITF	4
L1FLnI_2q32.3r	LINE	AZA/ITF	4
L1FLnI_2q33.1y	LINE	AZA/ITF	4
L1FLnI_2q36.3n	LINE	AZA/ITF	4
L1FLnI_3p12.2e	LINE	AZA/ITF	4
L1FLnI_3p12.2f	LINE	AZA/ITF	4
L1FLnI_3p12.2m	LINE	AZA/ITF	4
L1FLnI_3p12.3q	LINE	AZA/ITF	4
L1FLnI_3p22.1ba	LINE	AZA/ITF	4
L1FLnI_3p24.2m	LINE	AZA/ITF	4
L1FLnI_3p24.3g	LINE	AZA/ITF	4
L1FLnI_3p26.1h	LINE	AZA/ITF	4
L1FLnI_3q12.3f	LINE	AZA/ITF	4
L1FLnI_3q13.13q	LINE	AZA/ITF	4
L1FLnI_3q13.13w	LINE	AZA/ITF	4
L1FLnI_3q13.13x	LINE	AZA/ITF	4
L1FLnI_3q13.32d	LINE	AZA/ITF	4
L1FLnI_3q22.1w	LINE	AZA/ITF	4
L1FLnI_3q24fa	LINE	AZA/ITF	4
L1FLnI_3q24ga	LINE	AZA/ITF	4
L1FLnI_3q25.1i	LINE	AZA/ITF	4
L1FLnI_3q28m	LINE	AZA/ITF	4
L1FLnI_3q28o	LINE	AZA/ITF	4
L1FLnI_4p12n	LINE	AZA/ITF	4
L1FLnI_4p15.2m	LINE	AZA/ITF	4
L1FLnI_4q12xa	LINE	AZA/ITF	4
L1FLnI_4q22.1ma	LINE	AZA/ITF	4
L1FLnI_4q22.3n	LINE	AZA/ITF	4
L1FLnI_4q25ja	LINE	AZA/ITF	4
L1FLnI_4q26h	LINE	AZA/ITF	4
L1FLnI_4q28.1e	LINE	AZA/ITF	4
L1FLnI_4q28.1f	LINE	AZA/ITF	4
L1FLnI_4q28.1g	LINE	AZA/ITF	4
L1FLnI_4q28.2v	LINE	AZA/ITF	4
L1FLnI_4q28.3g	LINE	AZA/ITF	4
L1FLnI_4q28.3h	LINE	AZA/ITF	4
L1FLnI_4q28.3qa	LINE	AZA/ITF	4
L1FLnI_4q31.22k	LINE	AZA/ITF	4
L1FLnI_4q31.23g	LINE	AZA/ITF	4
L1FLnI_4q32.1n	LINE	AZA/ITF	4
L1FLnI_5p11e	LINE	AZA/ITF	4
L1FLnI_5p13.3x	LINE	AZA/ITF	4
L1FLnI_5p15.2b	LINE	AZA/ITF	4
L1FLnI_5p15.2m	LINE	AZA/ITF	4
L1FLnI_5p15.31s	LINE	AZA/ITF	4
L1FLnI_5q12.1q	LINE	AZA/ITF	4
L1FLnI_5q13.2d	LINE	AZA/ITF	4
L1FLnI_5q14.2d	LINE	AZA/ITF	4
L1FLnI_5q14.2e	LINE	AZA/ITF	4
L1FLnI_5q14.3j	LINE	AZA/ITF	4
L1FLnI_5q14.3p	LINE	AZA/ITF	4
L1FLnI_5q14.3w	LINE	AZA/ITF	4
L1FLnI_5q14.3x	LINE	AZA/ITF	4
L1FLnI_5q21.2f	LINE	AZA/ITF	4
L1FLnI_5q21.2g	LINE	AZA/ITF	4
L1FLnI_5q31.1e	LINE	AZA/ITF	4
L1FLnI_5q31.1h	LINE	AZA/ITF	4
L1FLnI_5q31.1i	LINE	AZA/ITF	4
L1FLnI_5q31.1j	LINE	AZA/ITF	4
L1FLnI_5q31.1k	LINE	AZA/ITF	4
L1FLnI_5q35.3f	LINE	AZA/ITF	4
L1FLnI_6p12.3u	LINE	AZA/ITF	4
L1FLnI_6p22.3v	LINE	AZA/ITF	4
L1FLnI_6p25.1a	LINE	AZA/ITF	4
L1FLnI_6p25.1c	LINE	AZA/ITF	4
L1FLnI_6q12da	LINE	AZA/ITF	4
L1FLnI_6q14.1m	LINE	AZA/ITF	4
L1FLnI_6q14.1n	LINE	AZA/ITF	4
L1FLnI_6q14.1z	LINE	AZA/ITF	4
L1FLnI_6q14.3b	LINE	AZA/ITF	4
L1FLnI_6q15n	LINE	AZA/ITF	4
L1FLnI_6q16.1v	LINE	AZA/ITF	4
L1FLnI_6q16.3o	LINE	AZA/ITF	4
L1FLnI_6q22.1ia	LINE	AZA/ITF	4
L1FLnI_6q24.1g	LINE	AZA/ITF	4
L1FLnI_6q24.1l	LINE	AZA/ITF	4
L1FLnI_6q24.1o	LINE	AZA/ITF	4
L1FLnI_7p12.3d	LINE	AZA/ITF	4
L1FLnI_7p15.3o	LINE	AZA/ITF	4
L1FLnI_7p21.1aa	LINE	AZA/ITF	4
L1FLnI_7p21.3ha	LINE	AZA/ITF	4
L1FLnI_7p21.3ka	LINE	AZA/ITF	4
L1FLnI_7p21.3oa	LINE	AZA/ITF	4
L1FLnI_7p21.3pa	LINE	AZA/ITF	4
L1FLnI_7p21.3qa	LINE	AZA/ITF	4
L1FLnI_7p21.3ta	LINE	AZA/ITF	4
L1FLnI_7p21.3z	LINE	AZA/ITF	4
L1FLnI_7q21.11m	LINE	AZA/ITF	4
L1FLnI_7q21.11ua	LINE	AZA/ITF	4
L1FLnI_7q21.13c	LINE	AZA/ITF	4
L1FLnI_7q21.13h	LINE	AZA/ITF	4
L1FLnI_7q35k	LINE	AZA/ITF	4
L1FLnI_8p11.1g	LINE	AZA/ITF	4
L1FLnI_8p12q	LINE	AZA/ITF	4
L1FLnI_8p21.3b	LINE	AZA/ITF	4
L1FLnI_8p21.3d	LINE	AZA/ITF	4
L1FLnI_8q11.1j	LINE	AZA/ITF	4
L1FLnI_8q11.23p	LINE	AZA/ITF	4
L1FLnI_8q21.12	LINE	AZA/ITF	4
L1FLnI_8q21.13x	LINE	AZA/ITF	4
L1FLnI_8q21.3k	LINE	AZA/ITF	4
L1FLnI_8q21.3ra	LINE	AZA/ITF	4
L1FLnI_8q22.3aa	LINE	AZA/ITF	4
L1FLnI_8q22.3z	LINE	AZA/ITF	4
L1FLnI_8q23.1w	LINE	AZA/ITF	4
L1FLnI_8q24.13k	LINE	AZA/ITF	4
L1FLnI_8q24.13l	LINE	AZA/ITF	4
L1FLnI_8q24.21g	LINE	AZA/ITF	4
L1FLnI_9p21.1s	LINE	AZA/ITF	4
L1FLnI_9q21.12a	LINE	AZA/ITF	4
L1FLnI_9q31.2p	LINE	AZA/ITF	4
L1FLnI_9q31.2s	LINE	AZA/ITF	4
L1FLnI_9q31.3a	LINE	AZA/ITF	4
L1FLnI_9q32c	LINE	AZA/ITF	4
L1FLnI_9q33.1a	LINE	AZA/ITF	4
L1FLnI_Xp11.21ba	LINE	AZA/ITF	4
L1FLnI_Xp11.21ca	LINE	AZA/ITF	4
L1FLnI_Xp11.21j	LINE	AZA/ITF	4
L1FLnI_Xp11.21la	LINE	AZA/ITF	4
L1FLnI_Xp11.3ga	LINE	AZA/ITF	4
L1FLnI_Xp11.3ha	LINE	AZA/ITF	4
L1FLnI_Xp11.4h	LINE	AZA/ITF	4
L1FLnI_Xp21.2a	LINE	AZA/ITF	4
L1FLnI_Xp22.12i	LINE	AZA/ITF	4
L1FLnI_Xq21.31x	LINE	AZA/ITF	4
L1FLnI_Xq21.33aa	LINE	AZA/ITF	4
L1FLnI_Xq21.33da	LINE	AZA/ITF	4
L1FLnI_Xq21.33fa	LINE	AZA/ITF	4
L1FLnI_Xq21.33i	LINE	AZA/ITF	4
L1FLnI_Xq21.33w	LINE	AZA/ITF	4
L1FLnI_Xq21.33x	LINE	AZA/ITF	4
L1FLnI_Xq23qa	LINE	AZA/ITF	4
L1FLnI_Xq23ra	LINE	AZA/ITF	4
L1FLnI_Xq24aa	LINE	AZA/ITF	4
L1FLnI_Xq24v	LINE	AZA/ITF	4
L1FLnI_Xq24x	LINE	AZA/ITF	4
L1FLnI_Xq24y	LINE	AZA/ITF	4
L1FLnI_Xq25t	LINE	AZA/ITF	4
L1FLnI_Xq26.1b	LINE	AZA/ITF	4
L1FLnI_Xq26.3b	LINE	AZA/ITF	4
L1FLnI_Xq27.2d	LINE	AZA/ITF	4
L1FLnI_Xq27.2e	LINE	AZA/ITF	4
L1FLnI_Xq28fa	LINE	AZA/ITF	4
L1FLnI_Xq28y	LINE	AZA/ITF	4
ERV316A3_11p13b	LTR	AZA/ITF	4
ERV316A3_11q22.3e	LTR	AZA/ITF	4
ERV316A3_11q23.3c	LTR	AZA/ITF	4
ERV316A3_13q14.11a	LTR	AZA/ITF	4
ERV316A3_15q14b	LTR	AZA/ITF	4
ERV316A3_3p12.2f	LTR	AZA/ITF	4
ERV316A3_3q13.12e	LTR	AZA/ITF	4
ERV316A3_5p14.3e	LTR	AZA/ITF	4
ERV316A3_5q21.2c	LTR	AZA/ITF	4
ERV316A3_5q21.2d	LTR	AZA/ITF	4
ERV316A3_6p21.33c	LTR	AZA/ITF	4
ERV316A3_6p22.3b	LTR	AZA/ITF	4
ERV316A3_6p24.3e	LTR	AZA/ITF	4
ERV316A3_6q24.2a	LTR	AZA/ITF	4
ERV316A3_8q21.11e	LTR	AZA/ITF	4
ERV316A3_8q22.3a	LTR	AZA/ITF	4
ERVL_10q24.31	LTR	AZA/ITF	4
ERVL_2p12b	LTR	AZA/ITF	4
ERVL_9q33.2b	LTR	AZA/ITF	4
ERVLB4_10q23.33c	LTR	AZA/ITF	4
ERVLB4_12q21.1a	LTR	AZA/ITF	4
ERVLB4_12q21.32b	LTR	AZA/ITF	4
ERVLB4_14q12a	LTR	AZA/ITF	4
ERVLB4_14q12b	LTR	AZA/ITF	4
ERVLB4_18p11.32c	LTR	AZA/ITF	4
ERVLB4_1p22.3c	LTR	AZA/ITF	4
ERVLB4_1p34.2a	LTR	AZA/ITF	4
ERVLB4_3q29a	LTR	AZA/ITF	4
ERVLB4_4q22.1b	LTR	AZA/ITF	4
ERVLB4_4q22.3b	LTR	AZA/ITF	4
ERVLB4_4q34.3a	LTR	AZA/ITF	4
ERVLB4_5q21.2	LTR	AZA/ITF	4
ERVLB4_6q22.31c	LTR	AZA/ITF	4
ERVLB4_7p21.3c	LTR	AZA/ITF	4
ERVLB4_7p21.3d	LTR	AZA/ITF	4
ERVLB4_8q22.3	LTR	AZA/ITF	4
ERVLB4_8q24.21	LTR	AZA/ITF	4
ERVLB4_Xq21.33f	LTR	AZA/ITF	4
ERVLE_1_KI270711v1_random	LTR	AZA/ITF	4
ERVLE_12q21.32b	LTR	AZA/ITF	4
ERVLE_2q14.3b	LTR	AZA/ITF	4
ERVLE_2q14.3c	LTR	AZA/ITF	4
ERVLE_2q22.3b	LTR	AZA/ITF	4
ERVLE_2q24.2b	LTR	AZA/ITF	4
ERVLE_2q37.3d	LTR	AZA/ITF	4
ERVLE_3q13.32	LTR	AZA/ITF	4
ERVLE_3q28b	LTR	AZA/ITF	4
ERVLE_3q28c	LTR	AZA/ITF	4
ERVLE_4q35.1a	LTR	AZA/ITF	4
ERVLE_5p13.2c	LTR	AZA/ITF	4
ERVLE_6p22.3c	LTR	AZA/ITF	4
ERVLE_6p24.1b	LTR	AZA/ITF	4
ERVLE_6q14.1g	LTR	AZA/ITF	4
ERVLE_7p21.3j	LTR	AZA/ITF	4
ERVLE_7q31.31a	LTR	AZA/ITF	4
HARLEQUIN_12q13.12	LTR	AZA/ITF	4
HARLEQUIN_1p22.1	LTR	AZA/ITF	4
HARLEQUIN_4q22.1b	LTR	AZA/ITF	4
HERV4_11q21	LTR	AZA/ITF	4
HERV9_10p13	LTR	AZA/ITF	4
HERV9_10q23.33	LTR	AZA/ITF	4
HERV9_13q33.3	LTR	AZA/ITF	4
HERV9_17q11.2b	LTR	AZA/ITF	4
HERV9_2q22.3	LTR	AZA/ITF	4
HERV9_5q31.2	LTR	AZA/ITF	4
HERV9_7p21.1	LTR	AZA/ITF	4
HERVE_1p36.12	LTR	AZA/ITF	4
HERVE_5q14.3b	LTR	AZA/ITF	4
HERVE_8p23.1j	LTR	AZA/ITF	4
HERVEA_12q23.1b	LTR	AZA/ITF	4
HERVEA_19p13.3	LTR	AZA/ITF	4
HERVEA_4p15.1	LTR	AZA/ITF	4
HERVEA_5q14.3	LTR	AZA/ITF	4
HERVEA_Xp11.21	LTR	AZA/ITF	4
HERVFH19_3p21.31	LTR	AZA/ITF	4
HERVFH19_9q34.11	LTR	AZA/ITF	4
HERVFRD_Xp21.1	LTR	AZA/ITF	4
HERVH_11q21a	LTR	AZA/ITF	4
HERVH_13q32.2	LTR	AZA/ITF	4
HERVH_13q33.2	LTR	AZA/ITF	4
HERVH_14q21.2a	LTR	AZA/ITF	4
HERVH_2p21b	LTR	AZA/ITF	4
HERVH_2p22.2a	LTR	AZA/ITF	4
HERVH_3q25.2b	LTR	AZA/ITF	4
HERVH_3q26.2d	LTR	AZA/ITF	4
HERVH_3q28c	LTR	AZA/ITF	4
HERVH_3q28d	LTR	AZA/ITF	4
HERVH_4q22.1h	LTR	AZA/ITF	4
HERVH_4q28.3e	LTR	AZA/ITF	4
HERVH_5q13.3b	LTR	AZA/ITF	4
HERVH_6q14.1f	LTR	AZA/ITF	4
HERVH_7q21.3b	LTR	AZA/ITF	4
HERVH_8q22.1b	LTR	AZA/ITF	4
HERVH_Xq23l	LTR	AZA/ITF	4
HERVH_Xq24c	LTR	AZA/ITF	4
HERVH48_7q22.1	LTR	AZA/ITF	4
HERVIP10F_1q31.1	LTR	AZA/ITF	4
HERVIP10F_6p25.1	LTR	AZA/ITF	4
HERVIP10F_7p21.3	LTR	AZA/ITF	4
HERVIP10FH_4p13	LTR	AZA/ITF	4
HERVK11_1q25.3	LTR	AZA/ITF	4
HERVL_10q23.33a	LTR	AZA/ITF	4
HERVL_11q22.3f	LTR	AZA/ITF	4
HERVL_11q24.1	LTR	AZA/ITF	4
HERVL_12q21.1f	LTR	AZA/ITF	4
HERVL_12q24.31	LTR	AZA/ITF	4
HERVL_15q21.3	LTR	AZA/ITF	4
HERVL_18p11.21b	LTR	AZA/ITF	4
HERVL_18p11.32a	LTR	AZA/ITF	4
HERVL_21q21.3d	LTR	AZA/ITF	4
HERVL_2q22.3a	LTR	AZA/ITF	4
HERVL_2q32.1f	LTR	AZA/ITF	4
HERVL_3p13a	LTR	AZA/ITF	4
HERVL_4q28.3a	LTR	AZA/ITF	4
HERVL_4q28.3b	LTR	AZA/ITF	4
HERVL_5q14.3c	LTR	AZA/ITF	4
HERVL_5q14.3d	LTR	AZA/ITF	4
HERVL_5q21.2a	LTR	AZA/ITF	4
HERVL_5q21.3a	LTR	AZA/ITF	4
HERVL_6p22.3a	LTR	AZA/ITF	4
HERVL_6p22.3b	LTR	AZA/ITF	4
HERVL_6q24.1e	LTR	AZA/ITF	4
HERVL_7q36.1a	LTR	AZA/ITF	4
HERVL_8q22.1a	LTR	AZA/ITF	4
HERVL_Xq24c	LTR	AZA/ITF	4
HERVL18_2p12	LTR	AZA/ITF	4
HERVL18_5p15.2	LTR	AZA/ITF	4
HERVL18_7p21.3	LTR	AZA/ITF	4
HERVL40_6q24.1	LTR	AZA/ITF	4
HERVL74_11p15.4	LTR	AZA/ITF	4
HERVL74_1q32.1	LTR	AZA/ITF	4
HERVL74_7p21.3	LTR	AZA/ITF	4
HERVL74_8q21.13	LTR	AZA/ITF	4
HERVP71A_8q24.13	LTR	AZA/ITF	4
HERVW_21q21.3	LTR	AZA/ITF	4
HERVW_3q28	LTR	AZA/ITF	4
HML2_Xq28b	LTR	AZA/ITF	4
HML3_11q12.1	LTR	AZA/ITF	4
HML4_3q26.2	LTR	AZA/ITF	4
HML5_6p22.3	LTR	AZA/ITF	4
HUERSP1_15q25.3	LTR	AZA/ITF	4
HUERSP1_8q21.13	LTR	AZA/ITF	4
HUERSP2_5q21.2	LTR	AZA/ITF	4
HUERSP2_6q14.1	LTR	AZA/ITF	4
HUERSP3_1p21.1	LTR	AZA/ITF	4
HUERSP3_8q11.1	LTR	AZA/ITF	4
HUERSP3_8q24.22	LTR	AZA/ITF	4
HUERSP3B_2q35	LTR	AZA/ITF	4
HUERSP3B_6p22.3b	LTR	AZA/ITF	4
HUERSP3B_6p22.3c	LTR	AZA/ITF	4
LTR23_Xq25b	LTR	AZA/ITF	4
LTR25_Xp11.3	LTR	AZA/ITF	4
MER4_14q21.1b	LTR	AZA/ITF	4
MER4_1q25.1a	LTR	AZA/ITF	4
MER4_1q44a	LTR	AZA/ITF	4
MER4_4q22.1	LTR	AZA/ITF	4
MER4_5p14.3b	LTR	AZA/ITF	4
MER4_Xq28b	LTR	AZA/ITF	4
MER41_11p15.5a	LTR	AZA/ITF	4
MER41_17q25.3	LTR	AZA/ITF	4
MER41_1p32.3	LTR	AZA/ITF	4
MER41_1p36.12	LTR	AZA/ITF	4
MER41_2q32.1	LTR	AZA/ITF	4
MER41_3q13.32	LTR	AZA/ITF	4
MER41_4q22.1c	LTR	AZA/ITF	4
MER4B_5p15.1	LTR	AZA/ITF	4
MER61_3p12.2	LTR	AZA/ITF	4
MER61_4q28.3c	LTR	AZA/ITF	4
MER61_4q32.3	LTR	AZA/ITF	4
MER61_Xq25a	LTR	AZA/ITF	4
MER61_Xq27.2	LTR	AZA/ITF	4
MER61_Xq27.3b	LTR	AZA/ITF	4
PABLA_7q32.1	LTR	AZA/ITF	4
PABLA_Yq11.222	LTR	AZA/ITF	4
PRIMAX_3q13.33	LTR	AZA/ITF	4
L1FLnI_11q11k	LINE	ITF	4
L1FLnI_12q24.33e	LINE	ITF	4
L1FLnI_13q31.1ma	LINE	ITF	4
L1FLnI_14q23.1c	LINE	ITF	4
L1FLnI_18p11.32p	LINE	ITF	4
L1FLnI_18q12.2h	LINE	ITF	4
L1FLnI_1p21.3da	LINE	ITF	4
L1FLnI_1p33t	LINE	ITF	4
L1FLnI_1q25.2k	LINE	ITF	4
L1FLnI_1q32.1g	LINE	ITF	4
L1FLnI_3p21.1d	LINE	ITF	4
L1FLnI_3q13.13j	LINE	ITF	4
L1FLnI_3q24da	LINE	ITF	4
L1FLnI_4q21.23b	LINE	ITF	4
L1FLnI_4q24na	LINE	ITF	4
L1FLnI_4q32.3k	LINE	ITF	4
L1FLnI_5q21.2d	LINE	ITF	4
L1FLnI_5q22.1c	LINE	ITF	4
L1FLnI_6q14.1hb	LINE	ITF	4
L1FLnI_7p21.1aa	LINE	ITF	4
L1FLnI_7q11.21l	LINE	ITF	4
L1FLnI_7q21.13c	LINE	ITF	4
L1FLnI_7q35k	LINE	ITF	4
L1FLnI_8p11.21b	LINE	ITF	4
L1FLnI_8q24.22o	LINE	ITF	4
L1FLnI_9q31.1t	LINE	ITF	4
ERVLE_10q22.3	LTR	ITF	4
ERVLE_11q22.1d	LTR	ITF	4
HERVH_1p21.1a	LTR	ITF	4
HERVH_1q31.1a	LTR	ITF	4
HERVH_3p22.1b	LTR	ITF	4
HERVH_6q25.3d	LTR	ITF	4
HERVL_3q26.33	LTR	ITF	4
HUERSP3_8q21.3	LTR	ITF	4
MER41_2p16.3b	LTR	ITF	4
MER4B_16q21a	LTR	ITF	4
L1FLI_12q24.32	LINE	AZA	3
L1FLI_16p13.2	LINE	AZA	3
L1FLI_18q22.2	LINE	AZA	3
L1FLI_1q44	LINE	AZA	3
L1FLI_3q22.1	LINE	AZA	3
L1FLI_5q21.1	LINE	AZA	3
L1FLI_8q21.11a	LINE	AZA	3
L1FLI_Xq11.2	LINE	AZA	3
L1FLI_Xq21.33	LINE	AZA	3
L1FLnI_10p11.21i	LINE	AZA	3
L1FLnI_10p11.21l	LINE	AZA	3
L1FLnI_10p11.22b	LINE	AZA	3
L1FLnI_10p11.22h	LINE	AZA	3
L1FLnI_10p11.23b	LINE	AZA	3
L1FLnI_10p12.1b	LINE	AZA	3
L1FLnI_10p12.1e	LINE	AZA	3
L1FLnI_10p12.1i	LINE	AZA	3
L1FLnI_10p12.1k	LINE	AZA	3
L1FLnI_10p12.2g	LINE	AZA	3
L1FLnI_10p12.31x	LINE	AZA	3
L1FLnI_10p12.33c	LINE	AZA	3
L1FLnI_10p13f	LINE	AZA	3
L1FLnI_10p15.1a	LINE	AZA	3
L1FLnI_10p15.2	LINE	AZA	3
L1FLnI_10p15.3b	LINE	AZA	3
L1FLnI_10p15.3d	LINE	AZA	3
L1FLnI_10q11.21o	LINE	AZA	3
L1FLnI_10q21.1ba	LINE	AZA	3
L1FLnI_10q21.1fa	LINE	AZA	3
L1FLnI_10q21.1ga	LINE	AZA	3
L1FLnI_10q21.1h	LINE	AZA	3
L1FLnI_10q21.1i	LINE	AZA	3
L1FLnI_10q21.1k	LINE	AZA	3
L1FLnI_10q21.1q	LINE	AZA	3
L1FLnI_10q21.1qa	LINE	AZA	3
L1FLnI_10q21.1z	LINE	AZA	3
L1FLnI_10q21.2b	LINE	AZA	3
L1FLnI_10q21.3a	LINE	AZA	3
L1FLnI_10q21.3d	LINE	AZA	3
L1FLnI_10q21.3da	LINE	AZA	3
L1FLnI_10q21.3j	LINE	AZA	3
L1FLnI_10q21.3p	LINE	AZA	3
L1FLnI_10q21.3r	LINE	AZA	3
L1FLnI_10q21.3s	LINE	AZA	3
L1FLnI_10q21.3z	LINE	AZA	3
L1FLnI_10q22.3d	LINE	AZA	3
L1FLnI_10q23.1c	LINE	AZA	3
L1FLnI_10q23.1ga	LINE	AZA	3
L1FLnI_10q23.1m	LINE	AZA	3
L1FLnI_10q23.1wa	LINE	AZA	3
L1FLnI_10q23.32f	LINE	AZA	3
L1FLnI_10q23.32h	LINE	AZA	3
L1FLnI_10q23.33f	LINE	AZA	3
L1FLnI_10q23.33h	LINE	AZA	3
L1FLnI_10q23.33l	LINE	AZA	3
L1FLnI_10q23.33p	LINE	AZA	3
L1FLnI_10q25.1i	LINE	AZA	3
L1FLnI_10q25.3b	LINE	AZA	3
L1FLnI_10q26.11c	LINE	AZA	3
L1FLnI_10q26.13b	LINE	AZA	3
L1FLnI_10q26.13d	LINE	AZA	3
L1FLnI_10q26.13j	LINE	AZA	3
L1FLnI_10q26.3d	LINE	AZA	3
L1FLnI_11p11.2h	LINE	AZA	3
L1FLnI_11p11.2s	LINE	AZA	3
L1FLnI_11p11.2w	LINE	AZA	3
L1FLnI_11p12j	LINE	AZA	3
L1FLnI_11p12s	LINE	AZA	3
L1FLnI_11p13h	LINE	AZA	3
L1FLnI_11p13i	LINE	AZA	3
L1FLnI_11p13k	LINE	AZA	3
L1FLnI_11p13q	LINE	AZA	3
L1FLnI_11p13s	LINE	AZA	3
L1FLnI_11p14.1a	LINE	AZA	3
L1FLnI_11p14.1j	LINE	AZA	3
L1FLnI_11p14.1s	LINE	AZA	3
L1FLnI_11p14.1t	LINE	AZA	3
L1FLnI_11p14.2e	LINE	AZA	3
L1FLnI_11p14.3da	LINE	AZA	3
L1FLnI_11p14.3fa	LINE	AZA	3
L1FLnI_11p14.3ja	LINE	AZA	3
L1FLnI_11p14.3r	LINE	AZA	3
L1FLnI_11p15.1s	LINE	AZA	3
L1FLnI_11p15.1v	LINE	AZA	3
L1FLnI_11p15.2t	LINE	AZA	3
L1FLnI_11p15.3k	LINE	AZA	3
L1FLnI_11p15.3l	LINE	AZA	3
L1FLnI_11p15.4a	LINE	AZA	3
L1FLnI_11p15.4e	LINE	AZA	3
L1FLnI_11p15.4m	LINE	AZA	3
L1FLnI_11p15.4n	LINE	AZA	3
L1FLnI_11p15.4q	LINE	AZA	3
L1FLnI_11p15.4s	LINE	AZA	3
L1FLnI_11p15.4u	LINE	AZA	3
L1FLnI_11q11r	LINE	AZA	3
L1FLnI_11q12.1a	LINE	AZA	3
L1FLnI_11q12.3i	LINE	AZA	3
L1FLnI_11q12.3n	LINE	AZA	3
L1FLnI_11q12.3q	LINE	AZA	3
L1FLnI_11q14.1m	LINE	AZA	3
L1FLnI_11q14.1p	LINE	AZA	3
L1FLnI_11q14.3j	LINE	AZA	3
L1FLnI_11q14.3n	LINE	AZA	3
L1FLnI_11q21a	LINE	AZA	3
L1FLnI_11q22.1ca	LINE	AZA	3
L1FLnI_11q22.1f	LINE	AZA	3
L1FLnI_11q22.2d	LINE	AZA	3
L1FLnI_11q22.3c	LINE	AZA	3
L1FLnI_11q22.3ea	LINE	AZA	3
L1FLnI_11q22.3g	LINE	AZA	3
L1FLnI_11q22.3j	LINE	AZA	3
L1FLnI_11q22.3ja	LINE	AZA	3
L1FLnI_11q22.3l	LINE	AZA	3
L1FLnI_11q23.3b	LINE	AZA	3
L1FLnI_11q24.2b	LINE	AZA	3
L1FLnI_11q24.2k	LINE	AZA	3
L1FLnI_11q24.3k	LINE	AZA	3
L1FLnI_11q24.3p	LINE	AZA	3
L1FLnI_11q25f	LINE	AZA	3
L1FLnI_12p11.1g	LINE	AZA	3
L1FLnI_12p11.21c	LINE	AZA	3
L1FLnI_12p12.1b	LINE	AZA	3
L1FLnI_12p12.1d	LINE	AZA	3
L1FLnI_12p12.1i	LINE	AZA	3
L1FLnI_12p12.1r	LINE	AZA	3
L1FLnI_12p12.2b	LINE	AZA	3
L1FLnI_12p12.3fa	LINE	AZA	3
L1FLnI_12p12.3n	LINE	AZA	3
L1FLnI_12p12.3r	LINE	AZA	3
L1FLnI_12p12.3u	LINE	AZA	3
L1FLnI_12p13.1c	LINE	AZA	3
L1FLnI_12q11d	LINE	AZA	3
L1FLnI_12q12ea	LINE	AZA	3
L1FLnI_12q12q	LINE	AZA	3
L1FLnI_12q12qa	LINE	AZA	3
L1FLnI_12q12v	LINE	AZA	3
L1FLnI_12q12za	LINE	AZA	3
L1FLnI_12q13.11p	LINE	AZA	3
L1FLnI_12q13.11s	LINE	AZA	3
L1FLnI_12q14.1aa	LINE	AZA	3
L1FLnI_12q14.2j	LINE	AZA	3
L1FLnI_12q15a	LINE	AZA	3
L1FLnI_12q15d	LINE	AZA	3
L1FLnI_12q21.1aa	LINE	AZA	3
L1FLnI_12q21.1da	LINE	AZA	3
L1FLnI_12q21.1s	LINE	AZA	3
L1FLnI_12q21.2g	LINE	AZA	3
L1FLnI_12q21.31d	LINE	AZA	3
L1FLnI_12q21.31p	LINE	AZA	3
L1FLnI_12q21.32aa	LINE	AZA	3
L1FLnI_12q21.32c	LINE	AZA	3
L1FLnI_12q21.32d	LINE	AZA	3
L1FLnI_12q21.32f	LINE	AZA	3
L1FLnI_12q21.32l	LINE	AZA	3
L1FLnI_12q21.32m	LINE	AZA	3
L1FLnI_12q21.32r	LINE	AZA	3
L1FLnI_12q21.32v	LINE	AZA	3
L1FLnI_12q21.33f	LINE	AZA	3
L1FLnI_12q21.33l	LINE	AZA	3
L1FLnI_12q23.1k	LINE	AZA	3
L1FLnI_12q23.1u	LINE	AZA	3
L1FLnI_12q23.2g	LINE	AZA	3
L1FLnI_12q24.13a	LINE	AZA	3
L1FLnI_12q24.13b	LINE	AZA	3
L1FLnI_12q24.32d	LINE	AZA	3
L1FLnI_13q12.11c	LINE	AZA	3
L1FLnI_13q12.12g	LINE	AZA	3
L1FLnI_13q13.3j	LINE	AZA	3
L1FLnI_13q13.3l	LINE	AZA	3
L1FLnI_13q14.13c	LINE	AZA	3
L1FLnI_13q14.2s	LINE	AZA	3
L1FLnI_13q14.3t	LINE	AZA	3
L1FLnI_13q21.2a	LINE	AZA	3
L1FLnI_13q21.2d	LINE	AZA	3
L1FLnI_13q21.2f	LINE	AZA	3
L1FLnI_13q21.32k	LINE	AZA	3
L1FLnI_13q21.33h	LINE	AZA	3
L1FLnI_13q22.2e	LINE	AZA	3
L1FLnI_13q22.2f	LINE	AZA	3
L1FLnI_13q31.1i	LINE	AZA	3
L1FLnI_13q31.1m	LINE	AZA	3
L1FLnI_13q31.1t	LINE	AZA	3
L1FLnI_13q31.1u	LINE	AZA	3
L1FLnI_13q31.3b	LINE	AZA	3
L1FLnI_13q32.1i	LINE	AZA	3
L1FLnI_13q32.2c	LINE	AZA	3
L1FLnI_13q33.1a	LINE	AZA	3
L1FLnI_13q33.2c	LINE	AZA	3
L1FLnI_13q33.2e	LINE	AZA	3
L1FLnI_14q11.2m	LINE	AZA	3
L1FLnI_14q12da	LINE	AZA	3
L1FLnI_14q12e	LINE	AZA	3
L1FLnI_14q12ea	LINE	AZA	3
L1FLnI_14q12ja	LINE	AZA	3
L1FLnI_14q12pa	LINE	AZA	3
L1FLnI_14q12t	LINE	AZA	3
L1FLnI_14q12v	LINE	AZA	3
L1FLnI_14q13.1b	LINE	AZA	3
L1FLnI_14q13.3h	LINE	AZA	3
L1FLnI_14q21.1g	LINE	AZA	3
L1FLnI_14q21.1ka	LINE	AZA	3
L1FLnI_14q21.1la	LINE	AZA	3
L1FLnI_14q21.1p	LINE	AZA	3
L1FLnI_14q21.1ra	LINE	AZA	3
L1FLnI_14q21.1sa	LINE	AZA	3
L1FLnI_14q21.1ta	LINE	AZA	3
L1FLnI_14q21.1va	LINE	AZA	3
L1FLnI_14q21.2a	LINE	AZA	3
L1FLnI_14q21.2h	LINE	AZA	3
L1FLnI_14q21.2i	LINE	AZA	3
L1FLnI_14q21.2k	LINE	AZA	3
L1FLnI_14q21.2n	LINE	AZA	3
L1FLnI_14q21.2p	LINE	AZA	3
L1FLnI_14q21.2s	LINE	AZA	3
L1FLnI_14q21.3f	LINE	AZA	3
L1FLnI_14q22.1b	LINE	AZA	3
L1FLnI_14q22.2a	LINE	AZA	3
L1FLnI_14q22.3l	LINE	AZA	3
L1FLnI_14q22.3o	LINE	AZA	3
L1FLnI_14q23.1c	LINE	AZA	3
L1FLnI_14q23.2e	LINE	AZA	3
L1FLnI_14q31.1k	LINE	AZA	3
L1FLnI_14q31.1o	LINE	AZA	3
L1FLnI_14q31.3ba	LINE	AZA	3
L1FLnI_14q32.12a	LINE	AZA	3
L1FLnI_15q11.2o	LINE	AZA	3
L1FLnI_15q14e	LINE	AZA	3
L1FLnI_15q14i	LINE	AZA	3
L1FLnI_15q14w	LINE	AZA	3
L1FLnI_15q21.1b	LINE	AZA	3
L1FLnI_15q21.2c	LINE	AZA	3
L1FLnI_15q21.3h	LINE	AZA	3
L1FLnI_15q21.3ha	LINE	AZA	3
L1FLnI_15q21.3t	LINE	AZA	3
L1FLnI_15q21.3w	LINE	AZA	3
L1FLnI_15q23c	LINE	AZA	3
L1FLnI_15q25.1d	LINE	AZA	3
L1FLnI_15q25.2h	LINE	AZA	3
L1FLnI_15q25.2j	LINE	AZA	3
L1FLnI_15q25.3t	LINE	AZA	3
L1FLnI_15q25.3x	LINE	AZA	3
L1FLnI_16p11.1b	LINE	AZA	3
L1FLnI_16p11.2t	LINE	AZA	3
L1FLnI_16p11.2w	LINE	AZA	3
L1FLnI_16p12.3b	LINE	AZA	3
L1FLnI_16q11.2a	LINE	AZA	3
L1FLnI_16q11.2d	LINE	AZA	3
L1FLnI_16q12.1o	LINE	AZA	3
L1FLnI_16q21ga	LINE	AZA	3
L1FLnI_16q21k	LINE	AZA	3
L1FLnI_16q21o	LINE	AZA	3
L1FLnI_16q23.2e	LINE	AZA	3
L1FLnI_17p13.1a	LINE	AZA	3
L1FLnI_17p13.3g	LINE	AZA	3
L1FLnI_17q11.1d	LINE	AZA	3
L1FLnI_17q11.2e	LINE	AZA	3
L1FLnI_17q22b	LINE	AZA	3
L1FLnI_18p11.21f	LINE	AZA	3
L1FLnI_18p11.21l	LINE	AZA	3
L1FLnI_18p11.21n	LINE	AZA	3
L1FLnI_18p11.31d	LINE	AZA	3
L1FLnI_18p11.32j	LINE	AZA	3
L1FLnI_18p11.32k	LINE	AZA	3
L1FLnI_18p11.32l	LINE	AZA	3
L1FLnI_18q12.2h	LINE	AZA	3
L1FLnI_18q12.2s	LINE	AZA	3
L1FLnI_18q12.3q	LINE	AZA	3
L1FLnI_18q12.3t	LINE	AZA	3
L1FLnI_18q21.2b	LINE	AZA	3
L1FLnI_18q21.2k	LINE	AZA	3
L1FLnI_18q21.2r	LINE	AZA	3
L1FLnI_18q21.2s	LINE	AZA	3
L1FLnI_18q21.33d	LINE	AZA	3
L1FLnI_19p12i	LINE	AZA	3
L1FLnI_19p12o	LINE	AZA	3
L1FLnI_19q11a	LINE	AZA	3
L1FLnI_19q13.11b	LINE	AZA	3
L1FLnI_19q13.2i	LINE	AZA	3
L1FLnI_19q13.42a	LINE	AZA	3
L1FLnI_19q13.42b	LINE	AZA	3
L1FLnI_1p11.2e	LINE	AZA	3
L1FLnI_1p11.2f	LINE	AZA	3
L1FLnI_1p12b	LINE	AZA	3
L1FLnI_1p12g	LINE	AZA	3
L1FLnI_1p13.3g	LINE	AZA	3
L1FLnI_1p13.3l	LINE	AZA	3
L1FLnI_1p21.1ba	LINE	AZA	3
L1FLnI_1p21.1h	LINE	AZA	3
L1FLnI_1p21.1i	LINE	AZA	3
L1FLnI_1p21.2j	LINE	AZA	3
L1FLnI_1p21.3da	LINE	AZA	3
L1FLnI_1p21.3g	LINE	AZA	3
L1FLnI_1p22.3b	LINE	AZA	3
L1FLnI_1p22.3h	LINE	AZA	3
L1FLnI_1p22.3p	LINE	AZA	3
L1FLnI_1p31.1dc	LINE	AZA	3
L1FLnI_1p31.1ec	LINE	AZA	3
L1FLnI_1p31.1g	LINE	AZA	3
L1FLnI_1p31.1ic	LINE	AZA	3
L1FLnI_1p31.1jb	LINE	AZA	3
L1FLnI_1p31.2d	LINE	AZA	3
L1FLnI_1p32.1a	LINE	AZA	3
L1FLnI_1p32.3i	LINE	AZA	3
L1FLnI_1p33f	LINE	AZA	3
L1FLnI_1p33q	LINE	AZA	3
L1FLnI_1p33r	LINE	AZA	3
L1FLnI_1p33t	LINE	AZA	3
L1FLnI_1p34.2a	LINE	AZA	3
L1FLnI_1p36.21b	LINE	AZA	3
L1FLnI_1q21.1e	LINE	AZA	3
L1FLnI_1q21.1i	LINE	AZA	3
L1FLnI_1q21.1j	LINE	AZA	3
L1FLnI_1q21.1k	LINE	AZA	3
L1FLnI_1q21.1l	LINE	AZA	3
L1FLnI_1q21.1n	LINE	AZA	3
L1FLnI_1q21.3i	LINE	AZA	3
L1FLnI_1q21.3l	LINE	AZA	3
L1FLnI_1q23.1c	LINE	AZA	3
L1FLnI_1q23.1t	LINE	AZA	3
L1FLnI_1q23.3s	LINE	AZA	3
L1FLnI_1q24.1h	LINE	AZA	3
L1FLnI_1q24.2s	LINE	AZA	3
L1FLnI_1q24.3a	LINE	AZA	3
L1FLnI_1q24.3b	LINE	AZA	3
L1FLnI_1q24.3c	LINE	AZA	3
L1FLnI_1q25.2g	LINE	AZA	3
L1FLnI_1q25.2l	LINE	AZA	3
L1FLnI_1q25.2t	LINE	AZA	3
L1FLnI_1q25.3b	LINE	AZA	3
L1FLnI_1q31.1f	LINE	AZA	3
L1FLnI_1q31.2g	LINE	AZA	3
L1FLnI_1q31.2k	LINE	AZA	3
L1FLnI_1q31.2n	LINE	AZA	3
L1FLnI_1q32.1d	LINE	AZA	3
L1FLnI_1q32.2l	LINE	AZA	3
L1FLnI_1q32.3k	LINE	AZA	3
L1FLnI_1q41l	LINE	AZA	3
L1FLnI_1q41qa	LINE	AZA	3
L1FLnI_1q42.2g	LINE	AZA	3
L1FLnI_1q42.2k	LINE	AZA	3
L1FLnI_1q44y	LINE	AZA	3
L1FLnI_20p11.1d	LINE	AZA	3
L1FLnI_20p11.22j	LINE	AZA	3
L1FLnI_20p11.22k	LINE	AZA	3
L1FLnI_20p12.1a	LINE	AZA	3
L1FLnI_20p12.1g	LINE	AZA	3
L1FLnI_20p12.2d	LINE	AZA	3
L1FLnI_20p12.3k	LINE	AZA	3
L1FLnI_20p12.3m	LINE	AZA	3
L1FLnI_20p13c	LINE	AZA	3
L1FLnI_20q11.1e	LINE	AZA	3
L1FLnI_20q11.21e	LINE	AZA	3
L1FLnI_20q12g	LINE	AZA	3
L1FLnI_20q13.2b	LINE	AZA	3
L1FLnI_20q13.2c	LINE	AZA	3
L1FLnI_21p11.2l	LINE	AZA	3
L1FLnI_21q21.1ea	LINE	AZA	3
L1FLnI_21q21.1fa	LINE	AZA	3
L1FLnI_21q21.1w	LINE	AZA	3
L1FLnI_21q21.1y	LINE	AZA	3
L1FLnI_21q21.3f	LINE	AZA	3
L1FLnI_21q21.3g	LINE	AZA	3
L1FLnI_21q22.12	LINE	AZA	3
L1FLnI_22p11.2e	LINE	AZA	3
L1FLnI_22p11.2g	LINE	AZA	3
L1FLnI_22p11.2h	LINE	AZA	3
L1FLnI_22q11.1k	LINE	AZA	3
L1FLnI_22q11.22c	LINE	AZA	3
L1FLnI_22q11.22e	LINE	AZA	3
L1FLnI_22q12.1a	LINE	AZA	3
L1FLnI_2p11.2h	LINE	AZA	3
L1FLnI_2p12bb	LINE	AZA	3
L1FLnI_2p12da	LINE	AZA	3
L1FLnI_2p12e	LINE	AZA	3
L1FLnI_2p12l	LINE	AZA	3
L1FLnI_2p12ra	LINE	AZA	3
L1FLnI_2p12u	LINE	AZA	3
L1FLnI_2p12w	LINE	AZA	3
L1FLnI_2p13.1d	LINE	AZA	3
L1FLnI_2p14c	LINE	AZA	3
L1FLnI_2p14f	LINE	AZA	3
L1FLnI_2p14j	LINE	AZA	3
L1FLnI_2p14v	LINE	AZA	3
L1FLnI_2p16.1da	LINE	AZA	3
L1FLnI_2p16.1k	LINE	AZA	3
L1FLnI_2p16.2a	LINE	AZA	3
L1FLnI_2p16.3aa	LINE	AZA	3
L1FLnI_2p16.3v	LINE	AZA	3
L1FLnI_2p16.3x	LINE	AZA	3
L1FLnI_2p22.3e	LINE	AZA	3
L1FLnI_2p22.3h	LINE	AZA	3
L1FLnI_2p24.1t	LINE	AZA	3
L1FLnI_2p24.3b	LINE	AZA	3
L1FLnI_2p24.3f	LINE	AZA	3
L1FLnI_2p24.3p	LINE	AZA	3
L1FLnI_2q12.1a	LINE	AZA	3
L1FLnI_2q14.1ea	LINE	AZA	3
L1FLnI_2q14.1t	LINE	AZA	3
L1FLnI_2q14.3a	LINE	AZA	3
L1FLnI_2q14.3b	LINE	AZA	3
L1FLnI_2q14.3ba	LINE	AZA	3
L1FLnI_2q14.3i	LINE	AZA	3
L1FLnI_2q21.1e	LINE	AZA	3
L1FLnI_2q21.2d	LINE	AZA	3
L1FLnI_2q22.1ea	LINE	AZA	3
L1FLnI_2q22.1f	LINE	AZA	3
L1FLnI_2q22.1m	LINE	AZA	3
L1FLnI_2q22.2c	LINE	AZA	3
L1FLnI_2q22.2d	LINE	AZA	3
L1FLnI_2q22.2i	LINE	AZA	3
L1FLnI_2q22.2j	LINE	AZA	3
L1FLnI_2q22.2k	LINE	AZA	3
L1FLnI_2q22.3b	LINE	AZA	3
L1FLnI_2q22.3f	LINE	AZA	3
L1FLnI_2q22.3j	LINE	AZA	3
L1FLnI_2q22.3o	LINE	AZA	3
L1FLnI_2q22.3u	LINE	AZA	3
L1FLnI_2q23.3b	LINE	AZA	3
L1FLnI_2q23.3m	LINE	AZA	3
L1FLnI_2q23.3v	LINE	AZA	3
L1FLnI_2q24.1d	LINE	AZA	3
L1FLnI_2q24.1ka	LINE	AZA	3
L1FLnI_2q24.1l	LINE	AZA	3
L1FLnI_2q24.1la	LINE	AZA	3
L1FLnI_2q24.1n	LINE	AZA	3
L1FLnI_2q24.1q	LINE	AZA	3
L1FLnI_2q24.1v	LINE	AZA	3
L1FLnI_2q24.1z	LINE	AZA	3
L1FLnI_2q24.2c	LINE	AZA	3
L1FLnI_2q24.2e	LINE	AZA	3
L1FLnI_2q24.2f	LINE	AZA	3
L1FLnI_2q24.2h	LINE	AZA	3
L1FLnI_2q24.2i	LINE	AZA	3
L1FLnI_2q24.2k	LINE	AZA	3
L1FLnI_2q24.2n	LINE	AZA	3
L1FLnI_2q24.2p	LINE	AZA	3
L1FLnI_2q24.3f	LINE	AZA	3
L1FLnI_2q31.1f	LINE	AZA	3
L1FLnI_2q31.1v	LINE	AZA	3
L1FLnI_2q31.1x	LINE	AZA	3
L1FLnI_2q31.3f	LINE	AZA	3
L1FLnI_2q31.3m	LINE	AZA	3
L1FLnI_2q32.1la	LINE	AZA	3
L1FLnI_2q32.1na	LINE	AZA	3
L1FLnI_2q32.1pa	LINE	AZA	3
L1FLnI_2q32.2b	LINE	AZA	3
L1FLnI_2q32.3aa	LINE	AZA	3
L1FLnI_2q32.3ba	LINE	AZA	3
L1FLnI_2q32.3l	LINE	AZA	3
L1FLnI_2q32.3m	LINE	AZA	3
L1FLnI_2q32.3r	LINE	AZA	3
L1FLnI_2q32.3s	LINE	AZA	3
L1FLnI_2q32.3z	LINE	AZA	3
L1FLnI_2q33.1d	LINE	AZA	3
L1FLnI_2q33.1f	LINE	AZA	3
L1FLnI_2q33.1h	LINE	AZA	3
L1FLnI_2q33.1j	LINE	AZA	3
L1FLnI_2q33.1q	LINE	AZA	3
L1FLnI_2q33.1s	LINE	AZA	3
L1FLnI_2q33.3d	LINE	AZA	3
L1FLnI_2q34d	LINE	AZA	3
L1FLnI_2q34m	LINE	AZA	3
L1FLnI_2q34s	LINE	AZA	3
L1FLnI_2q35m	LINE	AZA	3
L1FLnI_2q36.3l	LINE	AZA	3
L1FLnI_3p11.1w	LINE	AZA	3
L1FLnI_3p11.1x	LINE	AZA	3
L1FLnI_3p12.1a	LINE	AZA	3
L1FLnI_3p12.2d	LINE	AZA	3
L1FLnI_3p12.2f	LINE	AZA	3
L1FLnI_3p12.2g	LINE	AZA	3
L1FLnI_3p12.3f	LINE	AZA	3
L1FLnI_3p14.1ha	LINE	AZA	3
L1FLnI_3p14.3c	LINE	AZA	3
L1FLnI_3p14.3d	LINE	AZA	3
L1FLnI_3p21.1a	LINE	AZA	3
L1FLnI_3p21.1f	LINE	AZA	3
L1FLnI_3p22.1ba	LINE	AZA	3
L1FLnI_3p22.1o	LINE	AZA	3
L1FLnI_3p22.2g	LINE	AZA	3
L1FLnI_3p24.1e	LINE	AZA	3
L1FLnI_3p24.1g	LINE	AZA	3
L1FLnI_3p24.1i	LINE	AZA	3
L1FLnI_3p24.1j	LINE	AZA	3
L1FLnI_3p24.1v	LINE	AZA	3
L1FLnI_3p24.2a	LINE	AZA	3
L1FLnI_3p24.2h	LINE	AZA	3
L1FLnI_3p24.2j	LINE	AZA	3
L1FLnI_3p24.2k	LINE	AZA	3
L1FLnI_3p24.2m	LINE	AZA	3
L1FLnI_3p24.3ba	LINE	AZA	3
L1FLnI_3p24.3g	LINE	AZA	3
L1FLnI_3p24.3ga	LINE	AZA	3
L1FLnI_3p24.3ia	LINE	AZA	3
L1FLnI_3p24.3ja	LINE	AZA	3
L1FLnI_3p24.3x	LINE	AZA	3
L1FLnI_3p26.1x	LINE	AZA	3
L1FLnI_3q11.2fa	LINE	AZA	3
L1FLnI_3q11.2i	LINE	AZA	3
L1FLnI_3q11.2j	LINE	AZA	3
L1FLnI_3q12.2g	LINE	AZA	3
L1FLnI_3q12.2h	LINE	AZA	3
L1FLnI_3q13.11n	LINE	AZA	3
L1FLnI_3q13.11s	LINE	AZA	3
L1FLnI_3q13.11v	LINE	AZA	3
L1FLnI_3q13.12b	LINE	AZA	3
L1FLnI_3q13.12c	LINE	AZA	3
L1FLnI_3q13.13fa	LINE	AZA	3
L1FLnI_3q13.13ga	LINE	AZA	3
L1FLnI_3q13.13h	LINE	AZA	3
L1FLnI_3q13.13j	LINE	AZA	3
L1FLnI_3q13.13s	LINE	AZA	3
L1FLnI_3q13.13t	LINE	AZA	3
L1FLnI_3q13.13w	LINE	AZA	3
L1FLnI_3q13.2i	LINE	AZA	3
L1FLnI_3q13.2j	LINE	AZA	3
L1FLnI_3q13.32b	LINE	AZA	3
L1FLnI_3q13.32i	LINE	AZA	3
L1FLnI_3q13.32m	LINE	AZA	3
L1FLnI_3q13.33b	LINE	AZA	3
L1FLnI_3q13.33u	LINE	AZA	3
L1FLnI_3q22.1k	LINE	AZA	3
L1FLnI_3q22.1q	LINE	AZA	3
L1FLnI_3q22.3i	LINE	AZA	3
L1FLnI_3q22.3j	LINE	AZA	3
L1FLnI_3q22.3k	LINE	AZA	3
L1FLnI_3q24fa	LINE	AZA	3
L1FLnI_3q24ga	LINE	AZA	3
L1FLnI_3q24o	LINE	AZA	3
L1FLnI_3q24u	LINE	AZA	3
L1FLnI_3q25.1d	LINE	AZA	3
L1FLnI_3q25.1i	LINE	AZA	3
L1FLnI_3q25.2h	LINE	AZA	3
L1FLnI_3q25.31g	LINE	AZA	3
L1FLnI_3q25.32b	LINE	AZA	3
L1FLnI_3q25.32n	LINE	AZA	3
L1FLnI_3q25.33g	LINE	AZA	3
L1FLnI_3q26.1ia	LINE	AZA	3
L1FLnI_3q26.1t	LINE	AZA	3
L1FLnI_3q26.1w	LINE	AZA	3
L1FLnI_3q26.2h	LINE	AZA	3
L1FLnI_3q26.2j	LINE	AZA	3
L1FLnI_3q26.2m	LINE	AZA	3
L1FLnI_3q26.31d	LINE	AZA	3
L1FLnI_3q26.32e	LINE	AZA	3
L1FLnI_3q26.32h	LINE	AZA	3
L1FLnI_3q26.32l	LINE	AZA	3
L1FLnI_3q28d	LINE	AZA	3
L1FLnI_3q28g	LINE	AZA	3
L1FLnI_3q28h	LINE	AZA	3
L1FLnI_3q28i	LINE	AZA	3
L1FLnI_3q28p	LINE	AZA	3
L1FLnI_4p11f	LINE	AZA	3
L1FLnI_4p12r	LINE	AZA	3
L1FLnI_4p13d	LINE	AZA	3
L1FLnI_4p14c	LINE	AZA	3
L1FLnI_4p15.1u	LINE	AZA	3
L1FLnI_4p15.2n	LINE	AZA	3
L1FLnI_4p15.2q	LINE	AZA	3
L1FLnI_4p15.32e	LINE	AZA	3
L1FLnI_4p15.32j	LINE	AZA	3
L1FLnI_4p15.33j	LINE	AZA	3
L1FLnI_4p16.2a	LINE	AZA	3
L1FLnI_4p16.2g	LINE	AZA	3
L1FLnI_4p16.2j	LINE	AZA	3
L1FLnI_4p16.3c	LINE	AZA	3
L1FLnI_4q12cb	LINE	AZA	3
L1FLnI_4q12d	LINE	AZA	3
L1FLnI_4q12db	LINE	AZA	3
L1FLnI_4q12ib	LINE	AZA	3
L1FLnI_4q12j	LINE	AZA	3
L1FLnI_4q12n	LINE	AZA	3
L1FLnI_4q12na	LINE	AZA	3
L1FLnI_4q12oa	LINE	AZA	3
L1FLnI_4q12p	LINE	AZA	3
L1FLnI_4q12za	LINE	AZA	3
L1FLnI_4q13.1ja	LINE	AZA	3
L1FLnI_4q13.1oa	LINE	AZA	3
L1FLnI_4q13.1y	LINE	AZA	3
L1FLnI_4q13.2b	LINE	AZA	3
L1FLnI_4q13.2r	LINE	AZA	3
L1FLnI_4q13.2t	LINE	AZA	3
L1FLnI_4q13.2y	LINE	AZA	3
L1FLnI_4q13.3ea	LINE	AZA	3
L1FLnI_4q13.3w	LINE	AZA	3
L1FLnI_4q13.3za	LINE	AZA	3
L1FLnI_4q21.1b	LINE	AZA	3
L1FLnI_4q21.1c	LINE	AZA	3
L1FLnI_4q21.1o	LINE	AZA	3
L1FLnI_4q21.21w	LINE	AZA	3
L1FLnI_4q21.23n	LINE	AZA	3
L1FLnI_4q22.1c	LINE	AZA	3
L1FLnI_4q22.1ja	LINE	AZA	3
L1FLnI_4q22.3p	LINE	AZA	3
L1FLnI_4q22.3r	LINE	AZA	3
L1FLnI_4q22.3w	LINE	AZA	3
L1FLnI_4q23r	LINE	AZA	3
L1FLnI_4q24b	LINE	AZA	3
L1FLnI_4q24ga	LINE	AZA	3
L1FLnI_4q24ka	LINE	AZA	3
L1FLnI_4q24r	LINE	AZA	3
L1FLnI_4q24s	LINE	AZA	3
L1FLnI_4q24u	LINE	AZA	3
L1FLnI_4q25a	LINE	AZA	3
L1FLnI_4q25ga	LINE	AZA	3
L1FLnI_4q25ia	LINE	AZA	3
L1FLnI_4q25n	LINE	AZA	3
L1FLnI_4q26e	LINE	AZA	3
L1FLnI_4q26f	LINE	AZA	3
L1FLnI_4q26g	LINE	AZA	3
L1FLnI_4q26i	LINE	AZA	3
L1FLnI_4q26o	LINE	AZA	3
L1FLnI_4q27j	LINE	AZA	3
L1FLnI_4q27x	LINE	AZA	3
L1FLnI_4q28.1d	LINE	AZA	3
L1FLnI_4q28.1h	LINE	AZA	3
L1FLnI_4q28.1p	LINE	AZA	3
L1FLnI_4q28.1q	LINE	AZA	3
L1FLnI_4q28.1u	LINE	AZA	3
L1FLnI_4q28.1x	LINE	AZA	3
L1FLnI_4q28.1z	LINE	AZA	3
L1FLnI_4q28.2m	LINE	AZA	3
L1FLnI_4q28.2q	LINE	AZA	3
L1FLnI_4q28.2r	LINE	AZA	3
L1FLnI_4q28.2v	LINE	AZA	3
L1FLnI_4q28.3f	LINE	AZA	3
L1FLnI_4q28.3t	LINE	AZA	3
L1FLnI_4q28.3xa	LINE	AZA	3
L1FLnI_4q31.21g	LINE	AZA	3
L1FLnI_4q31.21ga	LINE	AZA	3
L1FLnI_4q31.21n	LINE	AZA	3
L1FLnI_4q31.21wa	LINE	AZA	3
L1FLnI_4q31.21y	LINE	AZA	3
L1FLnI_4q31.22k	LINE	AZA	3
L1FLnI_4q31.23e	LINE	AZA	3
L1FLnI_4q31.23i	LINE	AZA	3
L1FLnI_4q31.23m	LINE	AZA	3
L1FLnI_4q31.23q	LINE	AZA	3
L1FLnI_4q31.3h	LINE	AZA	3
L1FLnI_4q32.1a	LINE	AZA	3
L1FLnI_4q32.1v	LINE	AZA	3
L1FLnI_4q32.3y	LINE	AZA	3
L1FLnI_4q34.1d	LINE	AZA	3
L1FLnI_4q34.1r	LINE	AZA	3
L1FLnI_4q34.1t	LINE	AZA	3
L1FLnI_4q34.3a	LINE	AZA	3
L1FLnI_4q34.3e	LINE	AZA	3
L1FLnI_4q34.3f	LINE	AZA	3
L1FLnI_4q35.1e	LINE	AZA	3
L1FLnI_5p11e	LINE	AZA	3
L1FLnI_5p12ha	LINE	AZA	3
L1FLnI_5p12i	LINE	AZA	3
L1FLnI_5p13.1a	LINE	AZA	3
L1FLnI_5p13.1p	LINE	AZA	3
L1FLnI_5p13.1z	LINE	AZA	3
L1FLnI_5p13.2f	LINE	AZA	3
L1FLnI_5p13.2l	LINE	AZA	3
L1FLnI_5p13.2o	LINE	AZA	3
L1FLnI_5p13.2r	LINE	AZA	3
L1FLnI_5p13.3aa	LINE	AZA	3
L1FLnI_5p13.3p	LINE	AZA	3
L1FLnI_5p13.3t	LINE	AZA	3
L1FLnI_5p13.3v	LINE	AZA	3
L1FLnI_5p14.1f	LINE	AZA	3
L1FLnI_5p14.1k	LINE	AZA	3
L1FLnI_5p14.1s	LINE	AZA	3
L1FLnI_5p15.1m	LINE	AZA	3
L1FLnI_5p15.2d	LINE	AZA	3
L1FLnI_5p15.2h	LINE	AZA	3
L1FLnI_5p15.2i	LINE	AZA	3
L1FLnI_5p15.2j	LINE	AZA	3
L1FLnI_5p15.2m	LINE	AZA	3
L1FLnI_5p15.31a	LINE	AZA	3
L1FLnI_5p15.31b	LINE	AZA	3
L1FLnI_5p15.31r	LINE	AZA	3
L1FLnI_5p15.31s	LINE	AZA	3
L1FLnI_5q11.1j	LINE	AZA	3
L1FLnI_5q11.2h	LINE	AZA	3
L1FLnI_5q11.2ja	LINE	AZA	3
L1FLnI_5q11.2o	LINE	AZA	3
L1FLnI_5q11.2r	LINE	AZA	3
L1FLnI_5q11.2za	LINE	AZA	3
L1FLnI_5q12.1l	LINE	AZA	3
L1FLnI_5q13.1d	LINE	AZA	3
L1FLnI_5q13.1f	LINE	AZA	3
L1FLnI_5q13.3q	LINE	AZA	3
L1FLnI_5q14.2c	LINE	AZA	3
L1FLnI_5q14.3f	LINE	AZA	3
L1FLnI_5q14.3i	LINE	AZA	3
L1FLnI_5q14.3jb	LINE	AZA	3
L1FLnI_5q14.3l	LINE	AZA	3
L1FLnI_5q14.3lb	LINE	AZA	3
L1FLnI_5q14.3m	LINE	AZA	3
L1FLnI_5q14.3n	LINE	AZA	3
L1FLnI_5q14.3p	LINE	AZA	3
L1FLnI_5q14.3pb	LINE	AZA	3
L1FLnI_5q14.3q	LINE	AZA	3
L1FLnI_5q14.3u	LINE	AZA	3
L1FLnI_5q14.3ua	LINE	AZA	3
L1FLnI_5q14.3va	LINE	AZA	3
L1FLnI_5q14.3z	LINE	AZA	3
L1FLnI_5q15a	LINE	AZA	3
L1FLnI_5q15ia	LINE	AZA	3
L1FLnI_5q21.1aa	LINE	AZA	3
L1FLnI_5q21.1b	LINE	AZA	3
L1FLnI_5q21.1ba	LINE	AZA	3
L1FLnI_5q21.1p	LINE	AZA	3
L1FLnI_5q21.1y	LINE	AZA	3
L1FLnI_5q21.1z	LINE	AZA	3
L1FLnI_5q21.2c	LINE	AZA	3
L1FLnI_5q21.2d	LINE	AZA	3
L1FLnI_5q21.2f	LINE	AZA	3
L1FLnI_5q21.3g	LINE	AZA	3
L1FLnI_5q21.3j	LINE	AZA	3
L1FLnI_5q21.3u	LINE	AZA	3
L1FLnI_5q21.3x	LINE	AZA	3
L1FLnI_5q22.3f	LINE	AZA	3
L1FLnI_5q23.1aa	LINE	AZA	3
L1FLnI_5q23.1g	LINE	AZA	3
L1FLnI_5q23.1t	LINE	AZA	3
L1FLnI_5q23.2g	LINE	AZA	3
L1FLnI_5q23.2ra	LINE	AZA	3
L1FLnI_5q31.1e	LINE	AZA	3
L1FLnI_5q31.1f	LINE	AZA	3
L1FLnI_5q31.1j	LINE	AZA	3
L1FLnI_5q31.1q	LINE	AZA	3
L1FLnI_5q31.1v	LINE	AZA	3
L1FLnI_5q31.1w	LINE	AZA	3
L1FLnI_5q31.2f	LINE	AZA	3
L1FLnI_5q31.3h	LINE	AZA	3
L1FLnI_5q32a	LINE	AZA	3
L1FLnI_5q32n	LINE	AZA	3
L1FLnI_5q32r	LINE	AZA	3
L1FLnI_5q32u	LINE	AZA	3
L1FLnI_5q33.1c	LINE	AZA	3
L1FLnI_5q33.1l	LINE	AZA	3
L1FLnI_5q33.1r	LINE	AZA	3
L1FLnI_5q33.2g	LINE	AZA	3
L1FLnI_5q33.2h	LINE	AZA	3
L1FLnI_5q33.3c	LINE	AZA	3
L1FLnI_5q33.3d	LINE	AZA	3
L1FLnI_5q33.3i	LINE	AZA	3
L1FLnI_5q34a	LINE	AZA	3
L1FLnI_5q34f	LINE	AZA	3
L1FLnI_5q34ka	LINE	AZA	3
L1FLnI_5q34ra	LINE	AZA	3
L1FLnI_5q35.2h	LINE	AZA	3
L1FLnI_5q35.3f	LINE	AZA	3
L1FLnI_5q35.3j	LINE	AZA	3
L1FLnI_6p11.2a	LINE	AZA	3
L1FLnI_6p11.2g	LINE	AZA	3
L1FLnI_6p11.2j	LINE	AZA	3
L1FLnI_6p12.3ca	LINE	AZA	3
L1FLnI_6p12.3da	LINE	AZA	3
L1FLnI_6p12.3s	LINE	AZA	3
L1FLnI_6p12.3w	LINE	AZA	3
L1FLnI_6p22.1a	LINE	AZA	3
L1FLnI_6p22.3k	LINE	AZA	3
L1FLnI_6p22.3l	LINE	AZA	3
L1FLnI_6p22.3n	LINE	AZA	3
L1FLnI_6p24.2b	LINE	AZA	3
L1FLnI_6p25.1a	LINE	AZA	3
L1FLnI_6p25.1b	LINE	AZA	3
L1FLnI_6p25.1l	LINE	AZA	3
L1FLnI_6q11.1m	LINE	AZA	3
L1FLnI_6q11.1u	LINE	AZA	3
L1FLnI_6q12da	LINE	AZA	3
L1FLnI_6q12m	LINE	AZA	3
L1FLnI_6q13ba	LINE	AZA	3
L1FLnI_6q14.1bb	LINE	AZA	3
L1FLnI_6q14.1eb	LINE	AZA	3
L1FLnI_6q14.1m	LINE	AZA	3
L1FLnI_6q14.1n	LINE	AZA	3
L1FLnI_6q14.1ob	LINE	AZA	3
L1FLnI_6q14.1q	LINE	AZA	3
L1FLnI_6q14.1r	LINE	AZA	3
L1FLnI_6q14.2h	LINE	AZA	3
L1FLnI_6q14.2k	LINE	AZA	3
L1FLnI_6q14.3a	LINE	AZA	3
L1FLnI_6q14.3b	LINE	AZA	3
L1FLnI_6q14.3fa	LINE	AZA	3
L1FLnI_6q14.3t	LINE	AZA	3
L1FLnI_6q14.3va	LINE	AZA	3
L1FLnI_6q14.3xa	LINE	AZA	3
L1FLnI_6q16.1ka	LINE	AZA	3
L1FLnI_6q16.1u	LINE	AZA	3
L1FLnI_6q16.2b	LINE	AZA	3
L1FLnI_6q16.2j	LINE	AZA	3
L1FLnI_6q16.3l	LINE	AZA	3
L1FLnI_6q16.3o	LINE	AZA	3
L1FLnI_6q16.3v	LINE	AZA	3
L1FLnI_6q21a	LINE	AZA	3
L1FLnI_6q21ba	LINE	AZA	3
L1FLnI_6q21fa	LINE	AZA	3
L1FLnI_6q21u	LINE	AZA	3
L1FLnI_6q21v	LINE	AZA	3
L1FLnI_6q22.1fa	LINE	AZA	3
L1FLnI_6q22.1i	LINE	AZA	3
L1FLnI_6q22.1na	LINE	AZA	3
L1FLnI_6q22.31n	LINE	AZA	3
L1FLnI_6q22.31qa	LINE	AZA	3
L1FLnI_6q23.3c	LINE	AZA	3
L1FLnI_6q23.3l	LINE	AZA	3
L1FLnI_6q24.1e	LINE	AZA	3
L1FLnI_6q24.1j	LINE	AZA	3
L1FLnI_6q24.1p	LINE	AZA	3
L1FLnI_6q25.1e	LINE	AZA	3
L1FLnI_7p12.1c	LINE	AZA	3
L1FLnI_7p12.1d	LINE	AZA	3
L1FLnI_7p12.1v	LINE	AZA	3
L1FLnI_7p12.3i	LINE	AZA	3
L1FLnI_7p14.3i	LINE	AZA	3
L1FLnI_7p15.3f	LINE	AZA	3
L1FLnI_7p21.1h	LINE	AZA	3
L1FLnI_7p21.1t	LINE	AZA	3
L1FLnI_7p21.1x	LINE	AZA	3
L1FLnI_7p21.1y	LINE	AZA	3
L1FLnI_7p21.2d	LINE	AZA	3
L1FLnI_7p21.2i	LINE	AZA	3
L1FLnI_7p21.3a	LINE	AZA	3
L1FLnI_7p21.3f	LINE	AZA	3
L1FLnI_7p21.3ia	LINE	AZA	3
L1FLnI_7p21.3la	LINE	AZA	3
L1FLnI_7p21.3o	LINE	AZA	3
L1FLnI_7p21.3p	LINE	AZA	3
L1FLnI_7p21.3pa	LINE	AZA	3
L1FLnI_7p21.3sa	LINE	AZA	3
L1FLnI_7p21.3ua	LINE	AZA	3
L1FLnI_7p21.3va	LINE	AZA	3
L1FLnI_7p21.3y	LINE	AZA	3
L1FLnI_7q11.21k	LINE	AZA	3
L1FLnI_7q11.21l	LINE	AZA	3
L1FLnI_7q21.11g	LINE	AZA	3
L1FLnI_7q21.11ia	LINE	AZA	3
L1FLnI_7q21.11ua	LINE	AZA	3
L1FLnI_7q21.11z	LINE	AZA	3
L1FLnI_7q21.3b	LINE	AZA	3
L1FLnI_7q21.3u	LINE	AZA	3
L1FLnI_7q22.2e	LINE	AZA	3
L1FLnI_7q22.2g	LINE	AZA	3
L1FLnI_7q22.3a	LINE	AZA	3
L1FLnI_7q31.1ha	LINE	AZA	3
L1FLnI_7q31.1ja	LINE	AZA	3
L1FLnI_7q31.1r	LINE	AZA	3
L1FLnI_7q31.2i	LINE	AZA	3
L1FLnI_7q31.31k	LINE	AZA	3
L1FLnI_7q31.32b	LINE	AZA	3
L1FLnI_7q31.32n	LINE	AZA	3
L1FLnI_7q31.33d	LINE	AZA	3
L1FLnI_7q32.2a	LINE	AZA	3
L1FLnI_7q33q	LINE	AZA	3
L1FLnI_7q33t	LINE	AZA	3
L1FLnI_7q34d	LINE	AZA	3
L1FLnI_7q35c	LINE	AZA	3
L1FLnI_7q35d	LINE	AZA	3
L1FLnI_7q35h	LINE	AZA	3
L1FLnI_7q35k	LINE	AZA	3
L1FLnI_7q36.1g	LINE	AZA	3
L1FLnI_7q36.3d	LINE	AZA	3
L1FLnI_7q36.3e	LINE	AZA	3
L1FLnI_8p11.21b	LINE	AZA	3
L1FLnI_8p11.21i	LINE	AZA	3
L1FLnI_8p12da	LINE	AZA	3
L1FLnI_8p12e	LINE	AZA	3
L1FLnI_8p12na	LINE	AZA	3
L1FLnI_8p12o	LINE	AZA	3
L1FLnI_8p21.3b	LINE	AZA	3
L1FLnI_8p21.3c	LINE	AZA	3
L1FLnI_8p23.2h	LINE	AZA	3
L1FLnI_8q11.21k	LINE	AZA	3
L1FLnI_8q11.21l	LINE	AZA	3
L1FLnI_8q11.23m	LINE	AZA	3
L1FLnI_8q11.23p	LINE	AZA	3
L1FLnI_8q12.1m	LINE	AZA	3
L1FLnI_8q12.3aa	LINE	AZA	3
L1FLnI_8q12.3p	LINE	AZA	3
L1FLnI_8q13.1c	LINE	AZA	3
L1FLnI_8q13.3f	LINE	AZA	3
L1FLnI_8q21.11o	LINE	AZA	3
L1FLnI_8q21.11w	LINE	AZA	3
L1FLnI_8q21.12	LINE	AZA	3
L1FLnI_8q21.13aa	LINE	AZA	3
L1FLnI_8q21.13ba	LINE	AZA	3
L1FLnI_8q21.13cb	LINE	AZA	3
L1FLnI_8q21.13k	LINE	AZA	3
L1FLnI_8q21.13oa	LINE	AZA	3
L1FLnI_8q21.13ra	LINE	AZA	3
L1FLnI_8q21.13sa	LINE	AZA	3
L1FLnI_8q21.13x	LINE	AZA	3
L1FLnI_8q21.2b	LINE	AZA	3
L1FLnI_8q21.2g	LINE	AZA	3
L1FLnI_8q21.2n	LINE	AZA	3
L1FLnI_8q21.3a	LINE	AZA	3
L1FLnI_8q21.3ha	LINE	AZA	3
L1FLnI_8q21.3ra	LINE	AZA	3
L1FLnI_8q21.3s	LINE	AZA	3
L1FLnI_8q22.1ja	LINE	AZA	3
L1FLnI_8q22.1s	LINE	AZA	3
L1FLnI_8q22.1v	LINE	AZA	3
L1FLnI_8q22.3c	LINE	AZA	3
L1FLnI_8q23.1j	LINE	AZA	3
L1FLnI_8q23.1w	LINE	AZA	3
L1FLnI_8q23.2d	LINE	AZA	3
L1FLnI_8q23.3ba	LINE	AZA	3
L1FLnI_8q23.3g	LINE	AZA	3
L1FLnI_8q23.3k	LINE	AZA	3
L1FLnI_8q23.3v	LINE	AZA	3
L1FLnI_8q24.13d	LINE	AZA	3
L1FLnI_8q24.13l	LINE	AZA	3
L1FLnI_8q24.21g	LINE	AZA	3
L1FLnI_8q24.21l	LINE	AZA	3
L1FLnI_8q24.21m	LINE	AZA	3
L1FLnI_8q24.21s	LINE	AZA	3
L1FLnI_8q24.22o	LINE	AZA	3
L1FLnI_9p11.2i	LINE	AZA	3
L1FLnI_9p13.3b	LINE	AZA	3
L1FLnI_9p21.1b	LINE	AZA	3
L1FLnI_9p21.1ga	LINE	AZA	3
L1FLnI_9p21.1h	LINE	AZA	3
L1FLnI_9p21.1ja	LINE	AZA	3
L1FLnI_9p21.1k	LINE	AZA	3
L1FLnI_9p21.2f	LINE	AZA	3
L1FLnI_9p21.3a	LINE	AZA	3
L1FLnI_9p21.3r	LINE	AZA	3
L1FLnI_9p21.3w	LINE	AZA	3
L1FLnI_9p22.2h	LINE	AZA	3
L1FLnI_9p22.3c	LINE	AZA	3
L1FLnI_9p22.3q	LINE	AZA	3
L1FLnI_9p23aa	LINE	AZA	3
L1FLnI_9p24.1u	LINE	AZA	3
L1FLnI_9p24.1y	LINE	AZA	3
L1FLnI_9p24.3h	LINE	AZA	3
L1FLnI_9q21.12a	LINE	AZA	3
L1FLnI_9q21.13e	LINE	AZA	3
L1FLnI_9q21.13f	LINE	AZA	3
L1FLnI_9q21.13o	LINE	AZA	3
L1FLnI_9q21.31k	LINE	AZA	3
L1FLnI_9q21.31q	LINE	AZA	3
L1FLnI_9q31.1f	LINE	AZA	3
L1FLnI_9q31.3a	LINE	AZA	3
L1FLnI_9q31.3g	LINE	AZA	3
L1FLnI_9q32c	LINE	AZA	3
L1FLnI_9q33.1g	LINE	AZA	3
L1FLnI_9q33.2d	LINE	AZA	3
L1FLnI_9q33.2f	LINE	AZA	3
L1FLnI_9q33.2g	LINE	AZA	3
L1FLnI_9q34.2	LINE	AZA	3
L1FLnI_Xp11.21ac	LINE	AZA	3
L1FLnI_Xp11.21b	LINE	AZA	3
L1FLnI_Xp11.21ba	LINE	AZA	3
L1FLnI_Xp11.21ca	LINE	AZA	3
L1FLnI_Xp11.21ec	LINE	AZA	3
L1FLnI_Xp11.21k	LINE	AZA	3
L1FLnI_Xp11.21q	LINE	AZA	3
L1FLnI_Xp11.21r	LINE	AZA	3
L1FLnI_Xp11.21ra	LINE	AZA	3
L1FLnI_Xp11.21z	LINE	AZA	3
L1FLnI_Xp11.22ea	LINE	AZA	3
L1FLnI_Xp11.22n	LINE	AZA	3
L1FLnI_Xp11.3j	LINE	AZA	3
L1FLnI_Xp11.3l	LINE	AZA	3
L1FLnI_Xp11.3o	LINE	AZA	3
L1FLnI_Xp11.4k	LINE	AZA	3
L1FLnI_Xp21.1o	LINE	AZA	3
L1FLnI_Xp21.2d	LINE	AZA	3
L1FLnI_Xp21.3f	LINE	AZA	3
L1FLnI_Xp22.12o	LINE	AZA	3
L1FLnI_Xp22.2h	LINE	AZA	3
L1FLnI_Xp22.2l	LINE	AZA	3
L1FLnI_Xp22.33a	LINE	AZA	3
L1FLnI_Xq11.2ea	LINE	AZA	3
L1FLnI_Xq11.2f	LINE	AZA	3
L1FLnI_Xq11.2n	LINE	AZA	3
L1FLnI_Xq11.2na	LINE	AZA	3
L1FLnI_Xq11.2pa	LINE	AZA	3
L1FLnI_Xq13.1aa	LINE	AZA	3
L1FLnI_Xq13.1ba	LINE	AZA	3
L1FLnI_Xq13.1j	LINE	AZA	3
L1FLnI_Xq13.1y	LINE	AZA	3
L1FLnI_Xq13.2l	LINE	AZA	3
L1FLnI_Xq13.3a	LINE	AZA	3
L1FLnI_Xq13.3r	LINE	AZA	3
L1FLnI_Xq13.3t	LINE	AZA	3
L1FLnI_Xq13.3ua	LINE	AZA	3
L1FLnI_Xq13.3x	LINE	AZA	3
L1FLnI_Xq21.1a	LINE	AZA	3
L1FLnI_Xq21.1jc	LINE	AZA	3
L1FLnI_Xq21.1na	LINE	AZA	3
L1FLnI_Xq21.1ud	LINE	AZA	3
L1FLnI_Xq21.1wc	LINE	AZA	3
L1FLnI_Xq21.1zc	LINE	AZA	3
L1FLnI_Xq21.31fb	LINE	AZA	3
L1FLnI_Xq21.31g	LINE	AZA	3
L1FLnI_Xq21.31na	LINE	AZA	3
L1FLnI_Xq21.32g	LINE	AZA	3
L1FLnI_Xq21.32i	LINE	AZA	3
L1FLnI_Xq21.33aa	LINE	AZA	3
L1FLnI_Xq21.33ca	LINE	AZA	3
L1FLnI_Xq21.33fa	LINE	AZA	3
L1FLnI_Xq21.33hb	LINE	AZA	3
L1FLnI_Xq21.33qa	LINE	AZA	3
L1FLnI_Xq21.33sa	LINE	AZA	3
L1FLnI_Xq21.33va	LINE	AZA	3
L1FLnI_Xq21.33x	LINE	AZA	3
L1FLnI_Xq21.33xa	LINE	AZA	3
L1FLnI_Xq22.1ha	LINE	AZA	3
L1FLnI_Xq22.1ja	LINE	AZA	3
L1FLnI_Xq22.1n	LINE	AZA	3
L1FLnI_Xq22.1oa	LINE	AZA	3
L1FLnI_Xq23b	LINE	AZA	3
L1FLnI_Xq23ka	LINE	AZA	3
L1FLnI_Xq23tb	LINE	AZA	3
L1FLnI_Xq24x	LINE	AZA	3
L1FLnI_Xq24y	LINE	AZA	3
L1FLnI_Xq25c	LINE	AZA	3
L1FLnI_Xq25ca	LINE	AZA	3
L1FLnI_Xq25d	LINE	AZA	3
L1FLnI_Xq25gc	LINE	AZA	3
L1FLnI_Xq25jc	LINE	AZA	3
L1FLnI_Xq25mc	LINE	AZA	3
L1FLnI_Xq25u	LINE	AZA	3
L1FLnI_Xq25v	LINE	AZA	3
L1FLnI_Xq26.1e	LINE	AZA	3
L1FLnI_Xq26.2b	LINE	AZA	3
L1FLnI_Xq26.2q	LINE	AZA	3
L1FLnI_Xq26.3c	LINE	AZA	3
L1FLnI_Xq26.3da	LINE	AZA	3
L1FLnI_Xq26.3ea	LINE	AZA	3
L1FLnI_Xq26.3fa	LINE	AZA	3
L1FLnI_Xq26.3v	LINE	AZA	3
L1FLnI_Xq27.1f	LINE	AZA	3
L1FLnI_Xq27.1n	LINE	AZA	3
L1FLnI_Xq27.2d	LINE	AZA	3
L1FLnI_Xq27.2e	LINE	AZA	3
L1FLnI_Xq28aa	LINE	AZA	3
L1FLnI_Xq28d	LINE	AZA	3
L1FLnI_Xq28ea	LINE	AZA	3
L1FLnI_Xq28v	LINE	AZA	3
L1FLnI_Xq28x	LINE	AZA	3
L1FLnI_Yq11.221ta	LINE	AZA	3
L1ORF2_10p14	LINE	AZA	3
L1ORF2_15q21.2	LINE	AZA	3
L1ORF2_2p25.2	LINE	AZA	3
L1ORF2_2p25.3	LINE	AZA	3
L1ORF2_4p15.33	LINE	AZA	3
L1ORF2_4q32.1	LINE	AZA	3
L1ORF2_5p14.3	LINE	AZA	3
L1ORF2_6q13	LINE	AZA	3
L1ORF2_8q24.22	LINE	AZA	3
L1ORF2_Xq26.3	LINE	AZA	3
ERV316A3_11q13.3	LTR	AZA	3
ERV316A3_12p12.1a	LTR	AZA	3
ERV316A3_12q21.32c	LTR	AZA	3
ERV316A3_13q13.3c	LTR	AZA	3
ERV316A3_13q31.2a	LTR	AZA	3
ERV316A3_14q12d	LTR	AZA	3
ERV316A3_14q22.2	LTR	AZA	3
ERV316A3_14q24.2f	LTR	AZA	3
ERV316A3_18q22.1k	LTR	AZA	3
ERV316A3_1p22.3c	LTR	AZA	3
ERV316A3_1p31.1d	LTR	AZA	3
ERV316A3_1p31.1e	LTR	AZA	3
ERV316A3_1p36.22a	LTR	AZA	3
ERV316A3_1q24.2b	LTR	AZA	3
ERV316A3_20q12a	LTR	AZA	3
ERV316A3_2p13.3	LTR	AZA	3
ERV316A3_2q32.1i	LTR	AZA	3
ERV316A3_2q33.2	LTR	AZA	3
ERV316A3_3p12.2e	LTR	AZA	3
ERV316A3_3p12.2f	LTR	AZA	3
ERV316A3_3q13.2a	LTR	AZA	3
ERV316A3_3q13.32	LTR	AZA	3
ERV316A3_4p15.2a	LTR	AZA	3
ERV316A3_4q26a	LTR	AZA	3
ERV316A3_4q26b	LTR	AZA	3
ERV316A3_4q26c	LTR	AZA	3
ERV316A3_4q28.1a	LTR	AZA	3
ERV316A3_4q31.23d	LTR	AZA	3
ERV316A3_4q32.1h	LTR	AZA	3
ERV316A3_4q32.1k	LTR	AZA	3
ERV316A3_4q32.3b	LTR	AZA	3
ERV316A3_5q21.1c	LTR	AZA	3
ERV316A3_5q21.2d	LTR	AZA	3
ERV316A3_6p22.3b	LTR	AZA	3
ERV316A3_6p22.3c	LTR	AZA	3
ERV316A3_6p25.1d	LTR	AZA	3
ERV316A3_6q14.1a	LTR	AZA	3
ERV316A3_6q24.1g	LTR	AZA	3
ERV316A3_6q24.1h	LTR	AZA	3
ERV316A3_7q33d	LTR	AZA	3
ERV316A3_8p12a	LTR	AZA	3
ERV316A3_8q13.1b	LTR	AZA	3
ERV316A3_8q21.11e	LTR	AZA	3
ERV316A3_8q21.13a	LTR	AZA	3
ERV316A3_8q21.13h	LTR	AZA	3
ERV316A3_8q21.13j	LTR	AZA	3
ERV316A3_8q22.3a	LTR	AZA	3
ERV316A3_8q24.23c	LTR	AZA	3
ERV316A3_9q33.2	LTR	AZA	3
ERV316A3_Xq21.1a	LTR	AZA	3
ERVL_14q12	LTR	AZA	3
ERVL_21q21.1c	LTR	AZA	3
ERVL_4q22.1	LTR	AZA	3
ERVL_6p24.2	LTR	AZA	3
ERVL_7p21.2b	LTR	AZA	3
ERVL_Xq21.33b	LTR	AZA	3
ERVLB4_10q22.3a	LTR	AZA	3
ERVLB4_11q14.1	LTR	AZA	3
ERVLB4_12q21.1a	LTR	AZA	3
ERVLB4_12q21.32b	LTR	AZA	3
ERVLB4_12q23.2a	LTR	AZA	3
ERVLB4_12q23.2b	LTR	AZA	3
ERVLB4_13q31.2d	LTR	AZA	3
ERVLB4_14q12a	LTR	AZA	3
ERVLB4_14q12b	LTR	AZA	3
ERVLB4_14q21.1d	LTR	AZA	3
ERVLB4_14q31.1b	LTR	AZA	3
ERVLB4_18p11.32c	LTR	AZA	3
ERVLB4_19q13.31d	LTR	AZA	3
ERVLB4_1p22.3c	LTR	AZA	3
ERVLB4_1p36.12b	LTR	AZA	3
ERVLB4_1q25.1a	LTR	AZA	3
ERVLB4_22q11.1b	LTR	AZA	3
ERVLB4_2q12.3d	LTR	AZA	3
ERVLB4_3q29a	LTR	AZA	3
ERVLB4_4q21.1a	LTR	AZA	3
ERVLB4_4q22.3b	LTR	AZA	3
ERVLB4_4q26a	LTR	AZA	3
ERVLB4_4q26c	LTR	AZA	3
ERVLB4_5p14.3a	LTR	AZA	3
ERVLB4_5q21.2	LTR	AZA	3
ERVLB4_8p23.2c	LTR	AZA	3
ERVLB4_8q21.3c	LTR	AZA	3
ERVLB4_8q24.21	LTR	AZA	3
ERVLB4_9q31.2	LTR	AZA	3
ERVLB4_9q33.2	LTR	AZA	3
ERVLB4_Xq21.33f	LTR	AZA	3
ERVLB4_Xq24	LTR	AZA	3
ERVLB4_Xq26.3x	LTR	AZA	3
ERVLE_10q22.3	LTR	AZA	3
ERVLE_10q24.2	LTR	AZA	3
ERVLE_11q14.3d	LTR	AZA	3
ERVLE_11q22.3c	LTR	AZA	3
ERVLE_11q22.3j	LTR	AZA	3
ERVLE_11q24.3d	LTR	AZA	3
ERVLE_12q21.1f	LTR	AZA	3
ERVLE_13q14.2a	LTR	AZA	3
ERVLE_13q21.32c	LTR	AZA	3
ERVLE_13q31.1b	LTR	AZA	3
ERVLE_13q31.1i	LTR	AZA	3
ERVLE_14q12a	LTR	AZA	3
ERVLE_14q31.3e	LTR	AZA	3
ERVLE_15q14e	LTR	AZA	3
ERVLE_18p11.32	LTR	AZA	3
ERVLE_18q12.1b	LTR	AZA	3
ERVLE_1p33b	LTR	AZA	3
ERVLE_1p34.2f	LTR	AZA	3
ERVLE_1q32.1b	LTR	AZA	3
ERVLE_21q22.3b	LTR	AZA	3
ERVLE_2p16.3a	LTR	AZA	3
ERVLE_2p24.1g	LTR	AZA	3
ERVLE_2q14.1b	LTR	AZA	3
ERVLE_2q14.3b	LTR	AZA	3
ERVLE_2q14.3c	LTR	AZA	3
ERVLE_2q21.2a	LTR	AZA	3
ERVLE_2q22.3b	LTR	AZA	3
ERVLE_2q24.2b	LTR	AZA	3
ERVLE_2q33.1a	LTR	AZA	3
ERVLE_2q35b	LTR	AZA	3
ERVLE_3q28b	LTR	AZA	3
ERVLE_4p15.1g	LTR	AZA	3
ERVLE_4q13.3e	LTR	AZA	3
ERVLE_4q24b	LTR	AZA	3
ERVLE_4q24d	LTR	AZA	3
ERVLE_4q31.23c	LTR	AZA	3
ERVLE_4q35.1a	LTR	AZA	3
ERVLE_5p13.2c	LTR	AZA	3
ERVLE_5q15e	LTR	AZA	3
ERVLE_5q21.3b	LTR	AZA	3
ERVLE_5q23.3b	LTR	AZA	3
ERVLE_6p24.1b	LTR	AZA	3
ERVLE_6q14.1h	LTR	AZA	3
ERVLE_6q22.31j	LTR	AZA	3
ERVLE_6q23.3b	LTR	AZA	3
ERVLE_7p21.3g	LTR	AZA	3
ERVLE_7p21.3j	LTR	AZA	3
ERVLE_7q11.23	LTR	AZA	3
ERVLE_7q21.13b	LTR	AZA	3
ERVLE_8q21.13a	LTR	AZA	3
ERVLE_8q21.13d	LTR	AZA	3
ERVLE_8q21.13e	LTR	AZA	3
ERVLE_8q21.3e	LTR	AZA	3
ERVLE_9q33.2b	LTR	AZA	3
ERVLE_9q33.2c	LTR	AZA	3
HARLEQUIN_10q21.2b	LTR	AZA	3
HARLEQUIN_18p11.22b	LTR	AZA	3
HARLEQUIN_19p12b	LTR	AZA	3
HARLEQUIN_1p13.2b	LTR	AZA	3
HARLEQUIN_1q24.2	LTR	AZA	3
HARLEQUIN_4q22.1b	LTR	AZA	3
HARLEQUIN_6p21.33	LTR	AZA	3
HARLEQUIN_6p22.2	LTR	AZA	3
HARLEQUIN_6q23.1	LTR	AZA	3
HERV3_6p12.2	LTR	AZA	3
HERV3_6q14.3b	LTR	AZA	3
HERV30_3q26.1	LTR	AZA	3
HERV4_12q21.32	LTR	AZA	3
HERV4_15q26.1	LTR	AZA	3
HERV4_5q22.2	LTR	AZA	3
HERV9_11q22.1b	LTR	AZA	3
HERV9_12q22b	LTR	AZA	3
HERV9_17q11.2b	LTR	AZA	3
HERV9_2q22.3	LTR	AZA	3
HERV9_3p21.2	LTR	AZA	3
HERV9_3p24.3	LTR	AZA	3
HERV9_3q25.1	LTR	AZA	3
HERV9_5q13.2	LTR	AZA	3
HERVE_12p12.3	LTR	AZA	3
HERVE_3q22.1b	LTR	AZA	3
HERVE_4p16.3c	LTR	AZA	3
HERVE_8p23.1i	LTR	AZA	3
HERVEA_12q23.1b	LTR	AZA	3
HERVEA_19p13.3	LTR	AZA	3
HERVEA_5q14.3	LTR	AZA	3
HERVEA_Xp22.33	LTR	AZA	3
HERVEA_Xq28	LTR	AZA	3
HERVFH19_5q21.2	LTR	AZA	3
HERVFH19_9q34.11	LTR	AZA	3
HERVFH21_3q25.1	LTR	AZA	3
HERVFRD_15q11.2	LTR	AZA	3
HERVFRD_17q24.2	LTR	AZA	3
HERVFRD_4q31.21	LTR	AZA	3
HERVFRD_7p13	LTR	AZA	3
HERVFRD_7p21.3	LTR	AZA	3
HERVFRD_8q12.1d	LTR	AZA	3
HERVFRD_Xq21.31c	LTR	AZA	3
HERVH_11p15.1a	LTR	AZA	3
HERVH_11q24.1c	LTR	AZA	3
HERVH_11q24.2a	LTR	AZA	3
HERVH_12q15a	LTR	AZA	3
HERVH_14q13.1	LTR	AZA	3
HERVH_14q24.2b	LTR	AZA	3
HERVH_19q13.32d	LTR	AZA	3
HERVH_1p21.3b	LTR	AZA	3
HERVH_1p31.3d	LTR	AZA	3
HERVH_1p32.3a	LTR	AZA	3
HERVH_1q42.2c	LTR	AZA	3
HERVH_21q21.1a	LTR	AZA	3
HERVH_2p14c	LTR	AZA	3
HERVH_2p22.2b	LTR	AZA	3
HERVH_2q32.1c	LTR	AZA	3
HERVH_2q32.1d	LTR	AZA	3
HERVH_3p14.3a	LTR	AZA	3
[truncated: 39,666 more rows]
